# Supplementary material for: In Silico Molecular Dynamics of Griseofulvin and Its Derivatives Revealed Potential Therapeutic Applications for COVID-19
Source: MDPI journal article supplement (doi:10.3390/ijms23136889), 2022-06-21
Supplement: s1 [file s1]

Table S4. Molecular docking details of ligands interaction with Rbd.

| PubChem ID            | Binding Energy (kcal/mol) | H-bonds                       | Hydrophobic interactions                                       | Ligand interaction diagram                                                                                                                                                                                                                                                                       | Lipinski Analysis                                                                                                                              |                                           |
|-----------------------|---------------------------|-------------------------------|----------------------------------------------------------------|--------------------------------------------------------------------------------------------------------------------------------------------------------------------------------------------------------------------------------------------------------------------------------------------------|------------------------------------------------------------------------------------------------------------------------------------------------|-------------------------------------------|
| CID_7331772<br>(Rb2)  | -5.92                     | ARG 457<br>LYS 458<br>SER 459 | ARG 454<br>ARG 457<br>LYS 458<br>ASP 467<br>GLU 471<br>PRO 491 | 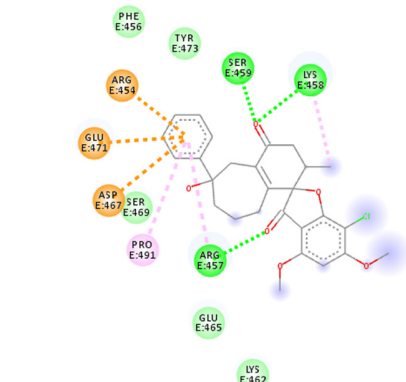 <p>Interactions</p> <ul style="list-style-type: none"> <li>van der Waals</li> <li>Conventional Hydrogen Bond</li> <li>Pi-Cation</li> <li>Pi-Anion</li> <li>Alkyl</li> <li>Pi-Alkyl</li> </ul>                 | Molecular weight (<500 Da)<br>Lipophilicity (LogP<5)<br>H bond donor (<5)<br>H bond acceptor (<10)<br>Violations<br>Lipinski<br>Hepatotoxicity | 417.5<br>3.47<br>0<br>5<br>0<br>Yes<br>No |
| CID_73330911<br>(Rb4) | -7.07                     | ARG 457<br>LYS 458<br>SER 459 | ARG 454<br>ARG 457<br>SER 469<br>GLU 471<br>PRO 491            |  <p>Interactions</p> <ul style="list-style-type: none"> <li>van der Waals</li> <li>Conventional Hydrogen Bond</li> <li>Carbon Hydrogen Bond</li> <li>Pi-Cation</li> <li>Pi-Anion</li> <li>Pi-Alkyl</li> </ul> | Molecular weight (<500 Da)<br>Lipophilicity (LogP<5)<br>H bond donor (<5)<br>H bond acceptor (<10)<br>Violations<br>Lipinski<br>Hepatotoxicity | 526.9<br>4.27<br>0<br>8<br>1<br>Yes<br>No |

Table S4. Molecular docking details of ligands interaction with Rbd.

|                       |       |                               |                                                                           |                                                                                     |                                                                                                                                                |                                           |
|-----------------------|-------|-------------------------------|---------------------------------------------------------------------------|-------------------------------------------------------------------------------------|------------------------------------------------------------------------------------------------------------------------------------------------|-------------------------------------------|
| CID_73331346<br>(Rb5) | -6.08 | ARG 454<br>ARG 457<br>GLU 471 | ARG 454<br>ARG 457<br>ASP 467<br>SER 469<br>GLU 471<br>PRO 491            | 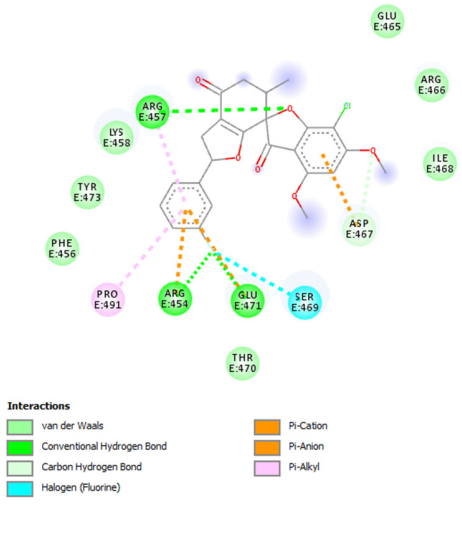  | Molecular weight (<500 Da)<br>Lipophilicity (LogP<5)<br>H bond donor (<5)<br>H bond acceptor (<10)<br>Violations<br>Lipinski<br>Hepatotoxicity | 458.8<br>3.73<br>0<br>7<br>0<br>Yes<br>No |
| CID_73331488<br>(Rb6) | -5.49 | ILE 468<br>ARG 454            | PHE 456<br>ARG 457<br>LYS 458<br>ASP 467<br>GLU 471<br>TYR 473<br>PRO 491 |  | Molecular weight (<500 Da)<br>Lipophilicity (LogP<5)<br>H bond donor (<5)<br>H bond acceptor (<10)<br>Violations<br>Lipinski<br>Hepatotoxicity | 508.8<br>4.00<br>0<br>9<br>1<br>Yes<br>No |

Table S4. Molecular docking details of ligands interaction with Rbd.

|                         |       |                                          |                                                                |                                                                                                                                                                                                              |                                                                                                                                                                                           |                                                                          |
|-------------------------|-------|------------------------------------------|----------------------------------------------------------------|--------------------------------------------------------------------------------------------------------------------------------------------------------------------------------------------------------------|-------------------------------------------------------------------------------------------------------------------------------------------------------------------------------------------|--------------------------------------------------------------------------|
| CID_11825421<br>4 (Rb7) | -6.68 | ARG 457<br>LYS 458<br>ILE 468<br>SER 469 | ARG 466<br>ILE 472<br>TYR 473<br>PRO 491                       | <p>Interactions</p> <ul style="list-style-type: none"> <li>van der Waals</li> <li>Conventional Hydrogen Bond</li> <li>Carbon Hydrogen Bond</li> <li>Halogen (Fluorine)</li> <li>Pi-Alkyl</li> </ul>          | <p>Molecular weight (&lt;500 Da)</p> <p>Lipophilicity (LogP&lt;5)</p> <p>H bond donor (&lt;5)</p> <p>H bond acceptor (&lt;10)</p> <p>Violations</p> <p>Lipinski</p> <p>Hepatotoxicity</p> | <p>458.8</p> <p>3.83</p> <p>0</p> <p>7</p> <p>0</p> <p>Yes</p> <p>No</p> |
| CID_11826324<br>6 (Rb8) | -7.02 | ARG 457<br>LYS 458<br>SER 459            | ARG 454<br>ARG 457<br>ASP 467<br>SER 469<br>GLU 471<br>PRO 491 | <p>Interactions</p> <ul style="list-style-type: none"> <li>van der Waals</li> <li>Conventional Hydrogen Bond</li> <li>Carbon Hydrogen Bond</li> <li>Pi-Cation</li> <li>Pi-Anion</li> <li>Pi-Alkyl</li> </ul> | <p>Molecular weight (&lt;500 Da)</p> <p>Lipophilicity (LogP&lt;5)</p> <p>H bond donor (&lt;5)</p> <p>H bond acceptor (&lt;10)</p> <p>Violations</p> <p>Lipinski</p> <p>Hepatotoxicity</p> | <p>526.9</p> <p>4.27</p> <p>0</p> <p>8</p> <p>1</p> <p>Yes</p> <p>No</p> |
