# Supplementary material for: In Silico Molecular Dynamics of Griseofulvin and Its Derivatives Revealed Potential Therapeutic Applications for COVID-19
Source: MDPI journal article supplement (doi:10.3390/ijms23136889), 2022-06-21
Supplement: s1 [file s1]

Table S5. Molecular docking details of ligands interaction with RdRp.

| PubChem ID            | Binding Energy (kcal/mol) | H- bonds                      | Hydrophobic interactions      | Ligand interaction diagram                                                                                                                                                 | Lipinski Analysis                                                                                                                              |                                           |
|-----------------------|---------------------------|-------------------------------|-------------------------------|----------------------------------------------------------------------------------------------------------------------------------------------------------------------------|------------------------------------------------------------------------------------------------------------------------------------------------|-------------------------------------------|
| CID_56924747<br>(Rd1) | -6.48                     | CYS 622                       | ASP 761<br>Glu 811<br>CYS 813 | <p>Interactions</p> <ul style="list-style-type: none"> <li>van der Waals</li> <li>Conventional Hydrogen Bond</li> <li>Carbon Hydrogen Bond</li> <li>Pi-Sulfur</li> </ul>   | Molecular weight (<500 Da)<br>Lipophilicity (LogP<5)<br>H bond donor (<5)<br>H bond acceptor (<10)<br>Violations<br>Lipinski<br>Hepatotoxicity | 478.9<br>3.68<br>0<br>6<br>0<br>Yes<br>No |
| CID_46844082<br>(Rd3) | -6.58                     | LYS 551<br>TYR 619<br>LYS 621 | ASP 618<br>CYS 622<br>LYS 798 | <p>Interactions</p> <ul style="list-style-type: none"> <li>van der Waals</li> <li>Conventional Hydrogen Bond</li> <li>Pi-Sigma</li> <li>Alkyl</li> <li>Pi-Alkyl</li> </ul> | Molecular weight (<500 Da)<br>Lipophilicity (LogP<5)<br>H bond donor (<5)<br>H bond acceptor (<10)<br>Violations<br>Lipinski<br>Hepatotoxicity | 641.1<br>5.51<br>0<br>8<br>2<br>Yes<br>No |

Table S5. Molecular docking details of ligands interaction with RdRp.

|                        |       |                               |                               |                                                                                                                                                                                                                                                                                                  |                                                                                                                                                |                                           |
|------------------------|-------|-------------------------------|-------------------------------|--------------------------------------------------------------------------------------------------------------------------------------------------------------------------------------------------------------------------------------------------------------------------------------------------|------------------------------------------------------------------------------------------------------------------------------------------------|-------------------------------------------|
| CID_118254216<br>(Rd4) | -6.62 | LYS 621<br>CYS 622<br>LYS 798 | ASP 618<br>CYS 622<br>ASP 623 | 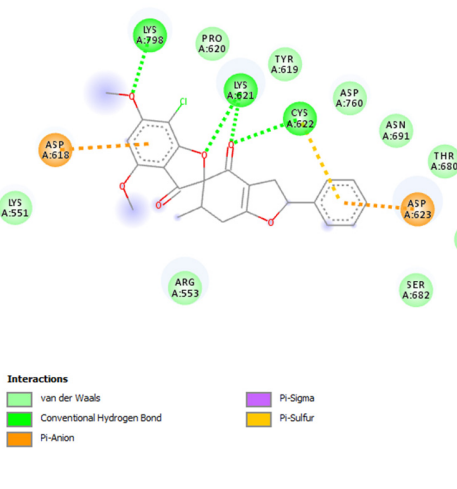 <p>Interactions</p> <ul style="list-style-type: none"> <li>van der Waals</li> <li>Conventional Hydrogen Bond</li> <li>Pi-Anion</li> <li>Pi-Sigma</li> <li>Pi-Sulfur</li> </ul>                                | Molecular weight (<500 Da)<br>Lipophilicity (LogP<5)<br>H bond donor (<5)<br>H bond acceptor (<10)<br>Violations<br>Lipinski<br>Hepatotoxicity | 440.8<br>3.65<br>0<br>6<br>0<br>Yes<br>No |
| CID_73331060<br>(Rd5)  | -6.87 | LYS 621<br>LYS 798            | LYS 621<br>CYS 622<br>ASP 623 |  <p>Interactions</p> <ul style="list-style-type: none"> <li>van der Waals</li> <li>Conventional Hydrogen Bond</li> <li>Carbon Hydrogen Bond</li> <li>Pi-Anion</li> <li>Pi-Sulfur</li> <li>Pi-Alkyl</li> </ul> | Molecular weight (<500 Da)<br>Lipophilicity (LogP<5)<br>H bond donor (<5)<br>H bond acceptor (<10)<br>Violations<br>Lipinski<br>Hepatotoxicity | 509.7<br>4.09<br>0<br>6<br>1<br>Yes<br>No |

Table S5. Molecular docking details of ligands interaction with RdRp.

|                       |       |         |                                                     |                                                                                                                                                                                                                                                                                                       |                                                                                                                                                |                                           |
|-----------------------|-------|---------|-----------------------------------------------------|-------------------------------------------------------------------------------------------------------------------------------------------------------------------------------------------------------------------------------------------------------------------------------------------------------|------------------------------------------------------------------------------------------------------------------------------------------------|-------------------------------------------|
| CID_73331487<br>(Rd8) | -6.01 | -       | ASP 618<br>PRO 620<br>LYS 621<br>ASP 761            | 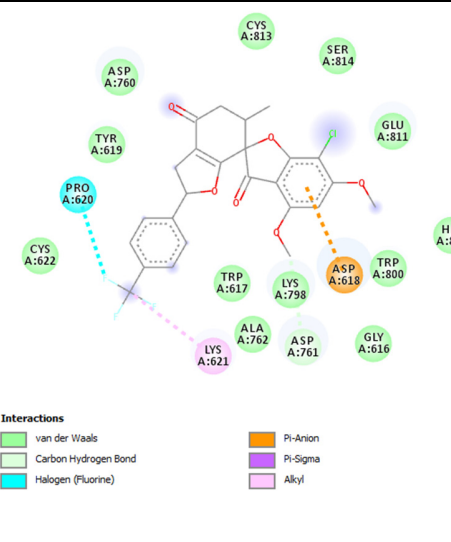 <p>Interactions</p> <ul style="list-style-type: none"> <li>van der Waals</li> <li>Carbon Hydrogen Bond</li> <li>Halogen (Fluorine)</li> <li>Pi-Anion</li> <li>Pi-Sigma</li> <li>Alkyl</li> </ul>                   | Molecular weight (<500 Da)<br>Lipophilicity (LogP<5)<br>H bond donor (<5)<br>H bond acceptor (<10)<br>Violations<br>Lipinski<br>Hepatotoxicity | 508.8<br>4.01<br>0<br>9<br>1<br>Yes<br>No |
| CID_73330763<br>(Rd9) | -6.84 | ARG 555 | HIS 439<br>ILE 548<br>ALA 550<br>ASP 618<br>LYS 798 |  <p>Interactions</p> <ul style="list-style-type: none"> <li>van der Waals</li> <li>Conventional Hydrogen Bond</li> <li>Carbon Hydrogen Bond</li> <li>Pi-Anion</li> <li>Pi-Pi T-shaped</li> <li>Pi-Alkyl</li> </ul> | Molecular weight (<500 Da)<br>Lipophilicity (LogP<5)<br>H bond donor (<5)<br>H bond acceptor (<10)<br>Violations<br>Lipinski<br>Hepatotoxicity | 516.9<br>4.22<br>0<br>6<br>1<br>Yes<br>No |
