# Supplementary material for: In Silico Molecular Dynamics of Griseofulvin and Its Derivatives Revealed Potential Therapeutic Applications for COVID-19
Source: MDPI journal article supplement (doi:10.3390/ijms23136889), 2022-06-21
Supplement: s1 [file s1]

Table S2. Molecular docking details of ligands interaction with Mprotease (6LU7).

| PubChem ID        | Binding Energy (kcal/mol) | H-bonds            | Hydrophobic interactions                                                | Ligand interaction diagram                                                                                                                                                                                | Lipinski Analysis                                                                                                                              |                                           |
|-------------------|---------------------------|--------------------|-------------------------------------------------------------------------|-----------------------------------------------------------------------------------------------------------------------------------------------------------------------------------------------------------|------------------------------------------------------------------------------------------------------------------------------------------------|-------------------------------------------|
| CID_25171849 (M2) | -8.86                     | GLY 143            | HIS 41<br>MET 49<br>LEU 141<br>MET 165<br>GLU 166<br>HIS 172<br>GLN 189 | <p>Interactions</p> <ul style="list-style-type: none"> <li>van der Waals</li> <li>Conventional Hydrogen Bond</li> <li>Carbon Hydrogen Bond</li> <li>Pi-Pi T-shaped</li> <li>Pi-Alkyl</li> </ul>           | Molecular weight (<500 Da)<br>Lipophilicity (LogP<5)<br>H bond donor (<5)<br>H bond acceptor (<10)<br>Violations<br>Lipinski<br>Hepatotoxicity | 478.9<br>3.29<br>0<br>6<br>0<br>Yes<br>No |
| CID_73330910 (M3) | -8.65                     | GLU 166<br>GLN 192 | HIS 41<br>ASN 142<br>CYS 145<br>MET 165<br>PRO 168<br>GLN 189           | <p>Interactions</p> <ul style="list-style-type: none"> <li>van der Waals</li> <li>Conventional Hydrogen Bond</li> <li>Carbon Hydrogen Bond</li> <li>Pi-Sulfur</li> <li>Alkyl</li> <li>Pi-Alkyl</li> </ul> | Molecular weight (<500 Da)<br>Lipophilicity (LogP<5)<br>H bond donor (<5)<br>H bond acceptor (<10)<br>Violations<br>Lipinski<br>Hepatotoxicity | 498.9<br>4.08<br>0<br>8<br>0<br>Yes<br>No |

Table S2. Molecular docking details of ligands interaction with Mprotease (6LU7).

|                       |       |                    |                                                                                                |                                                                                                                                                                                                                                                                                                                                                 |                                                                                                                                                |                                           |
|-----------------------|-------|--------------------|------------------------------------------------------------------------------------------------|-------------------------------------------------------------------------------------------------------------------------------------------------------------------------------------------------------------------------------------------------------------------------------------------------------------------------------------------------|------------------------------------------------------------------------------------------------------------------------------------------------|-------------------------------------------|
| CID_73331488<br>(M4)  | -8.08 | GLN 192            | HIS 41<br>PHE 140<br>CYS 145<br>MET 165<br>GLU 166<br>PRO 168<br>GLN 189<br>THR 190<br>ALA 191 | 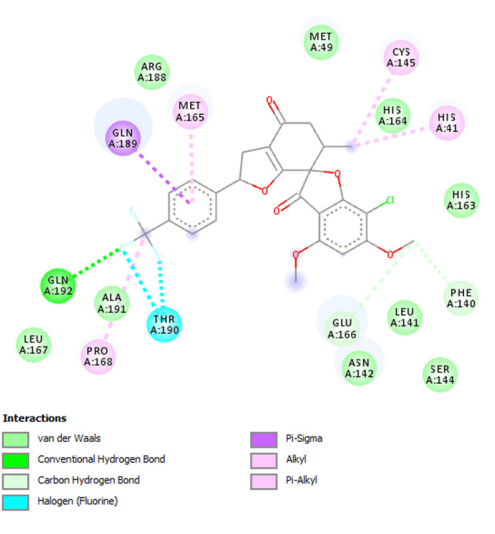 <p>Interactions</p> <ul style="list-style-type: none"> <li>van der Waals</li> <li>Conventional Hydrogen Bond</li> <li>Carbon Hydrogen Bond</li> <li>Halogen (Fluorine)</li> <li>Pi-Sigma</li> <li>Alkyl</li> <li>Pi-Alkyl</li> </ul>                         | Molecular weight (<500 Da)<br>Lipophilicity (LogP<5)<br>H bond donor (<5)<br>H bond acceptor (<10)<br>Violations<br>Lipinski<br>Hepatotoxicity | 508.8<br>4.00<br>0<br>9<br>1<br>Yes<br>No |
| CID_118254214<br>(M5) | -8.09 | ASN 142<br>GLU 166 | HIS 41<br>MET 49<br>PHE 140<br>LEU 141<br>HIS 164<br>MET 165<br>GLU 166                        |  <p>Interactions</p> <ul style="list-style-type: none"> <li>van der Waals</li> <li>Conventional Hydrogen Bond</li> <li>Carbon Hydrogen Bond</li> <li>Halogen (Fluorine)</li> <li>Pi-Anion</li> <li>Pi-Pi Stacked</li> <li>Alkyl</li> <li>Pi-Alkyl</li> </ul> | Molecular weight (<500 Da)<br>Lipophilicity (LogP<5)<br>H bond donor (<5)<br>H bond acceptor (<10)<br>Violations<br>Lipinski<br>Hepatotoxicity | 458.8<br>3.83<br>0<br>7<br>0<br>Yes<br>No |

Table S2. Molecular docking details of ligands interaction with Mprotease (6LU7).

|                       |       |                                                    |                                                     |                                                                                                                                                                                                     |                                                                                                                                                |                                            |
|-----------------------|-------|----------------------------------------------------|-----------------------------------------------------|-----------------------------------------------------------------------------------------------------------------------------------------------------------------------------------------------------|------------------------------------------------------------------------------------------------------------------------------------------------|--------------------------------------------|
| CID_138490235<br>(M6) | -7.76 | HIS 41<br>GLY 143<br>GLU 166<br>THR 190<br>GLN 192 | MET 165<br>GLU 166<br>PRO 168<br>GLN 189<br>THR 190 | <p>Interactions</p> <ul style="list-style-type: none"> <li>van der Waals</li> <li>Conventional Hydrogen Bond</li> <li>Carbon Hydrogen Bond</li> <li>Halogen (Fluorine)</li> <li>Pi-Alkyl</li> </ul> | Molecular weight (<500 Da)<br>Lipophilicity (LogP<5)<br>H bond donor (<5)<br>H bond acceptor (<10)<br>Violations<br>Lipinski<br>Hepatotoxicity | 470.8<br>2.84<br>0<br>11<br>1<br>Yes<br>No |
| CID_118254145<br>(M8) | -8.28 | GLU 166                                            | HIS 41<br>CYS 145<br>MET 165                        | <p>Interactions</p> <ul style="list-style-type: none"> <li>van der Waals</li> <li>Conventional Hydrogen Bond</li> <li>Carbon Hydrogen Bond</li> <li>Alkyl</li> <li>Pi-Alkyl</li> </ul>              | Molecular weight (<500 Da)<br>Lipophilicity (LogP<5)<br>H bond donor (<5)<br>H bond acceptor (<10)<br>Violations<br>Lipinski<br>Hepatotoxicity | 426.85<br>3.45<br>0<br>6<br>0<br>Yes<br>No |
