# Supplementary material for: In Silico Molecular Dynamics of Griseofulvin and Its Derivatives Revealed Potential Therapeutic Applications for COVID-19
Source: MDPI journal article supplement (doi:10.3390/ijms23136889), 2022-06-21
Supplement: s1 [file s1]

Table S6. Secondary structure changes upon ligand binding.

| Complex           | Coil      | B-Sheet   | B-Bridge | Bend      | Turn      | A-Helix   |
|-------------------|-----------|-----------|----------|-----------|-----------|-----------|
| 6LU7              | 88.2±3.05 | 74.3±2.2  | 3.5±.95  | 32.8±3.4  | 47.6±4.4  | 53.2±3.2  |
| 6lu7-144564153    | 82.1±3.5  | 78.7±3.6  | 6.6±1.3  | 26.2±2.8  | 47.7±4.7  | 55.2±4.2  |
| 6lu7-142550537    | 81.2±2.4  | 80.9±2.1  | 6.1±0.6  | 22.06±3.2 | 52.5±4.9  | 51.7±5.1  |
| 6lu7-griseofulvin | 79.1±2.9  | 79.2±2.4  | 5.2±0.98 | 33.6±3.1  | 45.2±4.9  | 51.5±4.3  |
| ACE2              | 96.9±3.4  | 20.23±3.7 | 5.07±1.7 | 57.1±4.9  | 83.9±7.8  | 286.5±8.1 |
| ACE2-132286359    | 97.6±3.2  | 23.35±2.7 | 3.89±1.1 | 56.1±4.6  | 68.8±7.2  | 326.7±6.4 |
| ACE2-46844082     | 87.7±3.2  | 21.97±2.7 | 4.2±1.3  | 56.8±4.5  | 72.5±7.6  | 325.1±6.9 |
| ACE2-griseofulvin | 90.5±3.4  | 24.6±3.8  | 2.5±1.4  | 60.7±4.5  | 69.3±8.7  | 314±7.5   |
| RBD               | 64.6±2.9  | 46.4±3.7  | 5.2±1.9  | 30.6±2.7  | 23.1±4.2  | 6.6±2.8   |
| RBD-griseofulvin  | 59.6±2.3  | 52±2.3    | 3.8±1.4  | 26.2±2.3  | 23.9±4.2  | 8.41±3.25 |
| RBD-125429633     | 64.8±2.8  | 47.3±2.6  | 4.5±1.5  | 28.4±2.9  | 22.8±3.75 | 8.75±3.5  |
| RBD-56950846      | 61.4±2.4  | 51.8±2.4  | 3.1±1.5  | 28.2±2.5  | 22.3±4.1  | 9.2±3.6   |
| RdRp              | 176.8±5   | 155.1±4.2 | 13.5±2.7 | 87.6±5.5  | 113.2±8.1 | 325±6.8   |
| RdRp-griseofulvin | 186.1±6   | 142.8±4.4 | 15.1±1.9 | 83.3±6.1  | 120.5±8.5 | 327.1±6.8 |
| RdRp-118254151    | 185.6±6.6 | 139.5±6.3 | 14.4±2.5 | 89.1±5.5  | 105±7.6   | 335±6.3   |
| RdRp-73331209     | 179.1±6.6 | 151.6±1.1 | 14.2±1.9 | 87.8±6.1  | 122.2±8.1 | 326.1±6.2 |
