# Supplementary material for: In Silico Molecular Dynamics of Griseofulvin and Its Derivatives Revealed Potential Therapeutic Applications for COVID-19
Source: MDPI journal article supplement (doi:10.3390/ijms23136889), 2022-06-21
Supplement: s1 [file s1]

Table S3. Molecular docking details of ligands interaction with ACE2.

| PubChem ID        | Binding Energy (kcal/mol) | H- bonds           | Hydrophobic interactions                                                             | Ligand interaction diagram                                                           | Lipinski Analysis                                                                                                                              |                                           |
|-------------------|---------------------------|--------------------|--------------------------------------------------------------------------------------|--------------------------------------------------------------------------------------|------------------------------------------------------------------------------------------------------------------------------------------------|-------------------------------------------|
| CID_10574693 (A1) | -6.66                     | ARG 514            | ALA 348<br>ASP 350<br>HIS 378<br>ASP 382<br>TYR 385<br>ASN 394<br>GLU 398<br>HIS 401 | 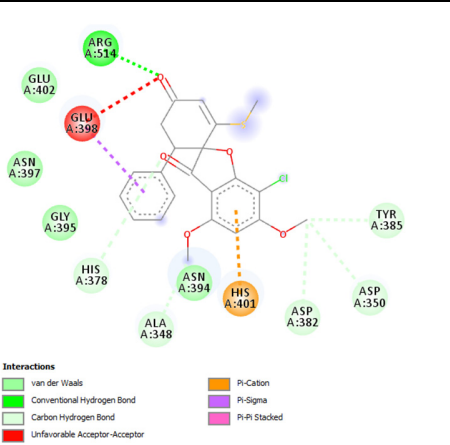  | Molecular weight (<500 Da)<br>Lipophilicity (LogP<5)<br>H bond donor (<5)<br>H bond acceptor (<10)<br>Violations<br>Lipinski<br>Hepatotoxicity | 430.9<br>3.39<br>0<br>5<br>0<br>Yes<br>No |
| CID_44566075 (A2) | -5.85                     | GLU 402<br>ARG 514 | GLU 375<br>HIS 401<br>GLU 402                                                        |  | Molecular weight (<500 Da)<br>Lipophilicity (LogP<5)<br>H bond donor (<5)<br>H bond acceptor (<10)<br>Violations<br>Lipinski<br>Hepatotoxicity | 428.8<br>3.25<br>1<br>6<br>0<br>Yes<br>No |

Table S3. Molecular docking details of ligands interaction with ACE2.

|                    |       |         |                                                                           |                                                                                      |                                                                                                                                                                                           |                                                                          |
|--------------------|-------|---------|---------------------------------------------------------------------------|--------------------------------------------------------------------------------------|-------------------------------------------------------------------------------------------------------------------------------------------------------------------------------------------|--------------------------------------------------------------------------|
| CID_118254131 (A4) | -5.74 | ARG 514 | ALA 348<br>HIS 378<br>ASN 394<br>GLU 398<br>HIS 401<br>GLU 402<br>ARG 514 | 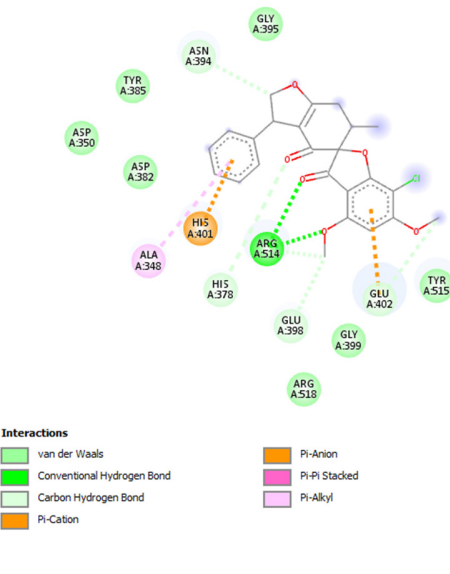  | <p>Molecular weight (&lt;500 Da)</p> <p>Lipophilicity (LogP&lt;5)</p> <p>H bond donor (&lt;5)</p> <p>H bond acceptor (&lt;10)</p> <p>Violations</p> <p>Lipinski</p> <p>Hepatotoxicity</p> | <p>440.8</p> <p>3.58</p> <p>0</p> <p>6</p> <p>0</p> <p>Yes</p> <p>No</p> |
| CID_118254232 (A5) | -6.30 | -       | ALA 348<br>HIS 378<br>ASP 382<br>GLU 398<br>ARG 514                       |  | <p>Molecular weight (&lt;500 Da)</p> <p>Lipophilicity (LogP&lt;5)</p> <p>H bond donor (&lt;5)</p> <p>H bond acceptor (&lt;10)</p> <p>Violations</p> <p>Lipinski</p> <p>Hepatotoxicity</p> | <p>458.8</p> <p>3.76</p> <p>0</p> <p>7</p> <p>0</p> <p>Yes</p> <p>No</p> |

Table S3. Molecular docking details of ligands interaction with ACE2.

|                    |       |                                          |                                          |                                                                                                                                                                                                                                                                                                       |                                                                                                                                                |                                            |
|--------------------|-------|------------------------------------------|------------------------------------------|-------------------------------------------------------------------------------------------------------------------------------------------------------------------------------------------------------------------------------------------------------------------------------------------------------|------------------------------------------------------------------------------------------------------------------------------------------------|--------------------------------------------|
| CID_129895222 (A6) | -6.55 | ALA 348<br>ASP 382                       | HIS 345<br>HIS 378<br>GLU 398<br>HIS 401 | 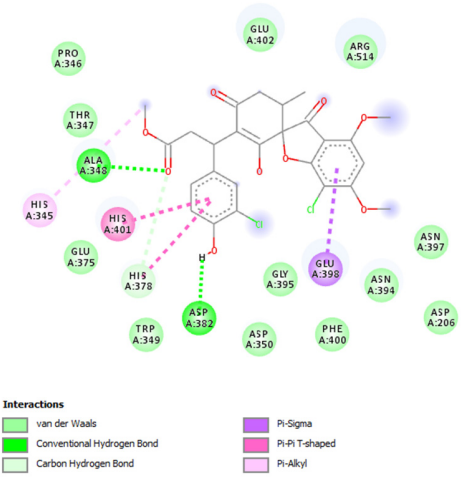 <p>Interactions</p> <ul style="list-style-type: none"> <li>van der Waals</li> <li>Conventional Hydrogen Bond</li> <li>Carbon Hydrogen Bond</li> <li>Pi-Sigma</li> <li>Pi-Pi T-shaped</li> <li>Pi-Alkyl</li> </ul> | Molecular weight (<500 Da)<br>Lipophilicity (LogP<5)<br>H bond donor (<5)<br>H bond acceptor (<10)<br>Violations<br>Lipinski<br>Hepatotoxicity | 551.37<br>3.61<br>2<br>9<br>1<br>Yes<br>No |
| CID_132286067 (A8) | -6.57 | ALA 348<br>ASP 350<br>ASP 382<br>GLY 395 | PRO 346<br>THR 347<br>HIS 378<br>HIS 401 |  <p>Interactions</p> <ul style="list-style-type: none"> <li>van der Waals</li> <li>Conventional Hydrogen Bond</li> <li>Carbon Hydrogen Bond</li> <li>Pi-Pi T-shaped</li> <li>Pi-Alkyl</li> </ul>                  | Molecular weight (<500 Da)<br>Lipophilicity (LogP<5)<br>H bond donor (<5)<br>H bond acceptor (<10)<br>Violations<br>Lipinski<br>Hepatotoxicity | 516.9<br>3.52<br>2<br>9<br>1<br>Yes<br>No  |
