# Supplementary material for: In Silico Molecular Dynamics of Griseofulvin and Its Derivatives Revealed Potential Therapeutic Applications for COVID-19
Source: MDPI journal article supplement (doi:10.3390/ijms23136889), 2022-06-21
Supplement: s1 [file s1]

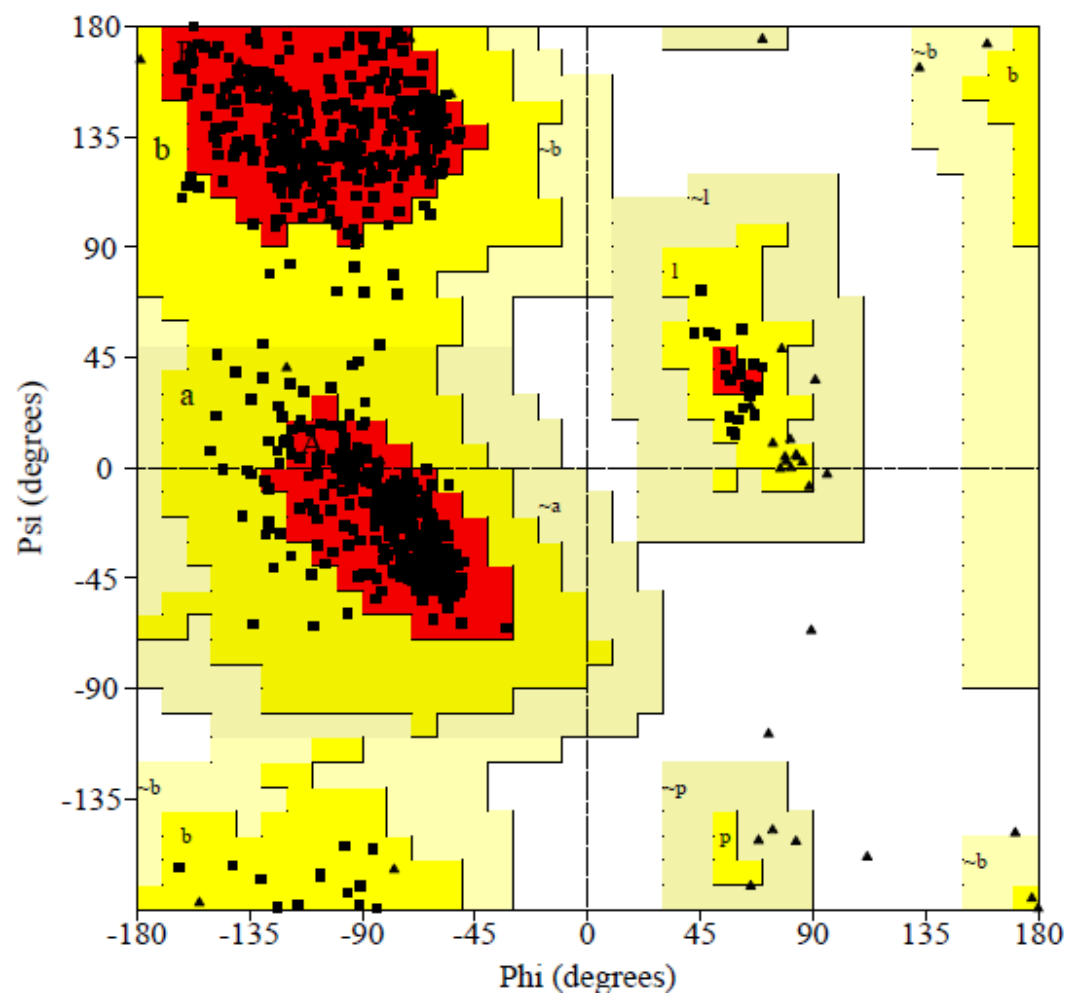

Figure S1. Ramachandran plot analysis of RdRp protein. Here, red region indicates favored region, yellow region for allowed and light yellow shows generously allowed region and white for disallowed region. Phi and Psi angles determine torsion angles.

Table S1. Ramachandran plot statistics of RdRp.

| Ramachandran plot statistics                         | RdRp    |        |
|------------------------------------------------------|---------|--------|
|                                                      | Residue | %      |
| Residues in the most favored regions [A,B,L]         | 960     | 92.00% |
| Residues in the additional allowed regions [a,b,l,p] | 84      | 8%     |
| Residues in the generously allowed regions [a,b,l,p] | 0       | 0%     |
| Residues in the disallowed regions [xx]              | 0       | 0%     |
| Number of non-glycine and non-proline residues       | 1044    | 100%   |
| Number of end residues (excl. Gly and Pro)           | 11      |        |
| Number of glycine residues (shown as triangles)      | 48      |        |
| Number of proline residues                           | 35      |        |
| Total number of residues                             | 1138    |        |
