# Supplementary material for: In Silico Molecular Dynamics of Griseofulvin and Its Derivatives Revealed Potential Therapeutic Applications for COVID-19
Source: Int J Mol Sci. 2022 Jun 21;23(13):6889. doi: 10.3390/ijms23136889 (PMC9267096; doi:10.3390/ijms23136889)
Supplement: Supplementary file 1 [file ijms-23-06889-s001.zip]

Archive with 9 entries (9 files):
- File S1.xls
- File S2.pdf
- File S3.xls
- File S4, Table S2.pdf
- File S4, Table S3.pdf
- File S4, Table S4.pdf
- File S4, Table S5.pdf
- File S5.pdf
- File S6.pdf
