# Supplementary material for: In Silico Molecular Dynamics of Griseofulvin and Its Derivatives Revealed Potential Therapeutic Applications for COVID-19
Source: Int J Mol Sci. 2022 Jun 21;23(13):6889. doi: 10.3390/ijms23136889 (PMC9267096; doi:10.3390/ijms23136889)
Supplement: Supplementary file 1 [file ijms-23-06889-s001.zip › File S1.xls]

## Sheet: Supplementary File 1 
CID ID	Compound Name	Molecular Weight	Molecular Formula	Isosmiles	inchikey	Iupacname
3512	Gris-PEG	352.8	C17H17ClO6	CC1CC(=O)C=C(C12C(=O)C3=C(O2)C(=C(C=C3OC)OC)Cl)OC	DDUHZTYCFQRHIY-UHFFFAOYSA-N	7-chloro-3',4,6-trimethoxy-5'-methylspiro[1-benzofuran-2,4'-cyclohex-2-ene]-1',3-dione
10097	7-Chloro-3',4,6-trimethoxy-5'-methylspiro[1-benzofuran-2,6'-cyclohex-2-ene]-1',3-dione	352.8	C17H17ClO6	CC1CC(=CC(=O)C12C(=O)C3=C(O2)C(=C(C=C3OC)OC)Cl)OC	FFKRWPQQTGWKIH-UHFFFAOYSA-N	7-chloro-3',4,6-trimethoxy-5'-methylspiro[1-benzofuran-2,6'-cyclohex-2-ene]-1',3-dione
31336	(2S)-7-chloro-3',4,6-trimethoxy-5'-methylspiro[1-benzofuran-2,4'-cyclohex-2-ene]-1',3-dione	352.8	C17H17ClO6	CC1CC(=O)C=C([C@]12C(=O)C3=C(O2)C(=C(C=C3OC)OC)Cl)OC	DDUHZTYCFQRHIY-UIQXJYDPSA-N	(2S)-7-chloro-3',4,6-trimethoxy-5'-methylspiro[1-benzofuran-2,4'-cyclohex-2-ene]-1',3-dione
161302	6-Demethylgriseofulvin	338.74	C16H15ClO6	CC1CC(=O)C=C(C12C(=O)C3=C(C=C(C(=C3O2)Cl)O)OC)OC	SYNGDIBHUPXIQA-UHFFFAOYSA-N	7-chloro-6-hydroxy-3',4-dimethoxy-5'-methylspiro[1-benzofuran-2,4'-cyclohex-2-ene]-1',3-dione
176431	Dtxsid80949069	338.74	C16H15ClO6	COC1=CC(=C(C2=C1C(=O)C3(O2)CCC(=O)C=C3OC)Cl)OC	KKKIYCGDJAVQGI-UHFFFAOYSA-N	7-chloro-3',4,6-trimethoxyspiro[1-benzofuran-2,4'-cyclohex-2-ene]-1',3-dione
195521	2'-Demethoxy-2'-methyldehydrogriseofulvin	334.7	C17H15ClO5	CC1=CC(=O)C=C(C12C(=O)C3=C(O2)C(=C(C=C3OC)OC)Cl)C	YSXFOJNCGPZFFU-UHFFFAOYSA-N	7-chloro-4,6-dimethoxy-3',5'-dimethylspiro[1-benzofuran-2,4'-cyclohexa-2,5-diene]-1',3-dione
195522	7-Chloro-4,6-dimethoxy-3',5'-dimethylspiro[1-benzofuran-2,4'-cyclohex-2-ene]-1',3-dione	336.8	C17H17ClO5	CC1CC(=O)C=C(C12C(=O)C3=C(O2)C(=C(C=C3OC)OC)Cl)C	MHGHFPYONBUSLO-UHFFFAOYSA-N	7-chloro-4,6-dimethoxy-3',5'-dimethylspiro[1-benzofuran-2,4'-cyclohex-2-ene]-1',3-dione
253250	Spiro[benzofuran-2(3H),1'-[2]cyclohexene]-3,4'-dione, 7-chloro-4,6-dimethoxy-6'-methyl-2'-(methylthio)-	368.8	C17H17ClO5S	CC1CC(=O)C=C(C12C(=O)C3=C(O2)C(=C(C=C3OC)OC)Cl)SC	DCCZLOASKLQMQQ-UHFFFAOYSA-N	7-chloro-4,6-dimethoxy-5'-methyl-3'-methylsulfanylspiro[1-benzofuran-2,4'-cyclohex-2-ene]-1',3-dione
289550	7-Chloro-4,6-dimethoxy-1-benzofuran-3(2h)-one	228.63	C10H9ClO4	COC1=CC(=C(C2=C1C(=O)CO2)Cl)OC	LXAQGDPMKKHFKF-UHFFFAOYSA-N	7-chloro-4,6-dimethoxy-1-benzofuran-3-one
298140	Spiro[benzofuran-2(3H),1'-[3]cyclohexene]-2',3-dione, 7-chloro-4,6-dimethoxy-6'-methyl-	322.74	C16H15ClO5	CC1CC=CC(=O)C12C(=O)C3=C(O2)C(=C(C=C3OC)OC)Cl	WCAAZXVCBHLGSE-UHFFFAOYSA-N	7-chloro-4,6-dimethoxy-5'-methylspiro[1-benzofuran-2,6'-cyclohex-2-ene]-1',3-dione
441140	Griseofulvin	352.8	C17H17ClO6	C[C@@H]1CC(=O)C=C([C@]12C(=O)C3=C(O2)C(=C(C=C3OC)OC)Cl)OC	DDUHZTYCFQRHIY-RBHXEPJQSA-N	(2S,5'R)-7-chloro-3',4,6-trimethoxy-5'-methylspiro[1-benzofuran-2,4'-cyclohex-2-ene]-1',3-dione
566721	Spiro[benzofuran-2(3H),1'-[3]cyclohexene]-2',3-dione, 7-chloro-6-hydroxy-4,4'-dimethoxy-6'-methyl-	338.74	C16H15ClO6	CC1CC(=CC(=O)C12C(=O)C3=C(C=C(C(=C3O2)Cl)O)OC)OC	BOBFBEVZUHZXCZ-UHFFFAOYSA-N	7-chloro-6-hydroxy-3',4-dimethoxy-5'-methylspiro[1-benzofuran-2,6'-cyclohex-2-ene]-1',3-dione
574586	Spiro[benzofuran-2(3H),1'-[3]cyclohexene]-2',3-dione, 7-chloro-4,4',6-trimethoxy-3',6'-dimethyl-	366.8	C18H19ClO6	CC1CC(=C(C(=O)C12C(=O)C3=C(O2)C(=C(C=C3OC)OC)Cl)C)OC	XOXLQNYOOAKSKC-UHFFFAOYSA-N	7-chloro-3',4,6-trimethoxy-2',5'-dimethylspiro[1-benzofuran-2,6'-cyclohex-2-ene]-1',3-dione
586839	Spiro[benzofuran-2(3H),1'-[2]cyclohexene]-3,4'-dione, 7-chloro-4-hydroxy-2',6-dimethoxy-6'-methyl-, methanesulfonate	416.8	C17H17ClO8S	CC1CC(=O)C=C(C12C(=O)C3=C(O2)C(=C(C=C3OS(=O)(=O)C)OC)Cl)OC	MGYHJTADXDTACX-UHFFFAOYSA-N	(7-chloro-1',6-dimethoxy-5'-methyl-3,3'-dioxospiro[1-benzofuran-2,6'-cyclohexene]-4-yl) methanesulfonate
586858	Spiro[benzofuran-2(3H),1'-[2]cyclohexene]-3,4'-dione, 5,7-dichloro-2',4,6-trimethoxy-6'-methyl-, (2S-trans)-	387.2	C17H16Cl2O6	CC1CC(=O)C=C(C12C(=O)C3=C(O2)C(=C(C(=C3OC)Cl)OC)Cl)OC	VOYKFNUPFUJNKL-UHFFFAOYSA-N	5,7-dichloro-3',4,6-trimethoxy-5'-methylspiro[1-benzofuran-2,4'-cyclohex-2-ene]-1',3-dione
592609	Spiro[benzofuran-2(3H),1'-[2]cyclohexene]-3,4'-dione, 7-chloro-2',4,6-trimethoxy-3',6'-dimethyl-	366.8	C18H19ClO6	CC1CC(=O)C(=C(C12C(=O)C3=C(O2)C(=C(C=C3OC)OC)Cl)OC)C	HMYYTHJMWUICRM-UHFFFAOYSA-N	7-chloro-3',4,6-trimethoxy-2',5'-dimethylspiro[1-benzofuran-2,4'-cyclohex-2-ene]-1',3-dione
611914	7-Chloro-4,6-dimethoxy-5'-methylspiro[1-benzofuran-2,4'-cyclohex-2-ene]-1',3-dione	322.74	C16H15ClO5	CC1CC(=O)C=CC12C(=O)C3=C(O2)C(=C(C=C3OC)OC)Cl	HVPYSAOMOUOPRL-UHFFFAOYSA-N	7-chloro-4,6-dimethoxy-5'-methylspiro[1-benzofuran-2,4'-cyclohex-2-ene]-1',3-dione
611918	Spiro[benzofuran-2(3H),1'-[2]cyclohexene]-3,4'-dione, 2',7-dichloro-4,6-dimethoxy-6'-methyl-	357.2	C16H14Cl2O5	CC1CC(=O)C=C(C12C(=O)C3=C(O2)C(=C(C=C3OC)OC)Cl)Cl	ZARJFOZMHNKHAD-UHFFFAOYSA-N	3',7-dichloro-4,6-dimethoxy-5'-methylspiro[1-benzofuran-2,4'-cyclohex-2-ene]-1',3-dione
612127	Spiro[benzofuran-2(3H),1'-[2]cyclohexene]-3,4'-dione, 7-chloro-5'-hydroxy-2',4,6-trimethoxy-6'-methyl-, [1'S-(1'alpha,5'beta,6'beta)]-	368.8	C17H17ClO7	CC1C(C(=O)C=C(C12C(=O)C3=C(O2)C(=C(C=C3OC)OC)Cl)OC)O	SJUXBYNINSBOOT-UHFFFAOYSA-N	7-chloro-6'-hydroxy-3',4,6-trimethoxy-5'-methylspiro[1-benzofuran-2,4'-cyclohex-2-ene]-1',3-dione
617268	Spiro[benzofuran-2(3H),1'-cyclohexane]-2',3,4'-trione, 7-chloro-6-methoxy-4,6'-dimethyl-	322.74	C16H15ClO5	CC1CC(=O)CC(=O)C12C(=O)C3=C(O2)C(=C(C=C3C)OC)Cl	VKGMBELWKBFZKP-UHFFFAOYSA-N	7-chloro-6-methoxy-4,5'-dimethylspiro[1-benzofuran-2,4'-cyclohexane]-1',3,3'-trione
617713	Spiro[benzofuran-2(3H),1'-cyclohexane]-2',3,4'-trione, 7-chloro-4-hydroxy-6-methoxy-6'-methyl-	324.71	C15H13ClO6	CC1CC(=O)CC(=O)C12C(=O)C3=C(O2)C(=C(C=C3O)OC)Cl	FGWPOVGQXIYLFA-UHFFFAOYSA-N	7-chloro-4-hydroxy-6-methoxy-5'-methylspiro[1-benzofuran-2,4'-cyclohexane]-1',3,3'-trione
617901	Spiro[benzofuran-2(3H),1'-cyclohexane]-2',3,4'-trione, 7-chloro-6-hydroxy-4-methoxy-6'-methyl-	324.71	C15H13ClO6	CC1CC(=O)CC(=O)C12C(=O)C3=C(C=C(C(=C3O2)Cl)O)OC	SXCNFUDOBRUGOV-UHFFFAOYSA-N	7-chloro-6-hydroxy-4-methoxy-5'-methylspiro[1-benzofuran-2,4'-cyclohexane]-1',3,3'-trione
620242	Spiro[benzofuran-2(3H),1'-[3]cyclohexene]-2',3-dione, 7-chloro-4,6-dimethoxy-6'-methyl-4'-(methylthio)-	368.8	C17H17ClO5S	CC1CC(=CC(=O)C12C(=O)C3=C(O2)C(=C(C=C3OC)OC)Cl)SC	KXOZDHIFNBTGKC-UHFFFAOYSA-N	7-chloro-4,6-dimethoxy-5'-methyl-3'-methylsulfanylspiro[1-benzofuran-2,6'-cyclohex-2-ene]-1',3-dione
620360	Spiro[benzofuran-2(3H),1'-cyclohexane]-2',3-dione, 7-chloro-4,4',6-trimethoxy-6'-methyl-	354.8	C17H19ClO6	CC1CC(CC(=O)C12C(=O)C3=C(O2)C(=C(C=C3OC)OC)Cl)OC	RJAXPZYJHCLJOY-UHFFFAOYSA-N	7-chloro-4,5',6-trimethoxy-3'-methylspiro[1-benzofuran-2,2'-cyclohexane]-1',3-dione
620368	Spiro[benzofuran-2(3H),1'-cyclohexane]-3,4'-dione, 7-chloro-2',4,6-trimethoxy-6'-methyl-	354.8	C17H19ClO6	CC1CC(=O)CC(C12C(=O)C3=C(O2)C(=C(C=C3OC)OC)Cl)OC	IIUZTXTZRGLYTI-UHFFFAOYSA-N	7-chloro-3',4,6-trimethoxy-5'-methylspiro[1-benzofuran-2,4'-cyclohexane]-1',3-dione
620370	Spiro[benzofuran-2(3H),1'-[3]cyclohexene]-2',3-dione, 4',7-dichloro-4,6-dimethoxy-6'-methyl-	357.2	C16H14Cl2O5	CC1CC(=CC(=O)C12C(=O)C3=C(O2)C(=C(C=C3OC)OC)Cl)Cl	DWFAJTZKBVTMQY-UHFFFAOYSA-N	3',7-dichloro-4,6-dimethoxy-5'-methylspiro[1-benzofuran-2,6'-cyclohex-2-ene]-1',3-dione
620371	Spiro[benzofuran-2(3H),1'-cyclohexan]-3-one, 7-chloro-4'-hydroxy-2',4,6-trimethoxy-6'-methyl-	356.8	C17H21ClO6	CC1CC(CC(C12C(=O)C3=C(O2)C(=C(C=C3OC)OC)Cl)OC)O	ZUAVWHYWKWBECT-UHFFFAOYSA-N	7-chloro-4'-hydroxy-2',4,6-trimethoxy-6'-methylspiro[1-benzofuran-2,1'-cyclohexane]-3-one
620374	Spiro[benzofuran-2(3H),1'-cyclohexane]-2',3,4'-trione, 3',7-dichloro-4,6-dimethoxy-6'-methyl-	373.2	C16H14Cl2O6	CC1CC(=O)C(C(=O)C12C(=O)C3=C(O2)C(=C(C=C3OC)OC)Cl)Cl	PLUXNSMVIZJKBP-UHFFFAOYSA-N	2',7-dichloro-4,6-dimethoxy-5'-methylspiro[1-benzofuran-2,4'-cyclohexane]-1',3,3'-trione
622712	Spiro[benzofuran-2(3H),1'-cyclohexane]-2',3-dione, 7-chloro-4,6-dimethoxy-6'-methyl-	324.75	C16H17ClO5	CC1CCCC(=O)C12C(=O)C3=C(O2)C(=C(C=C3OC)OC)Cl	GRCGJNQSUAPUMF-UHFFFAOYSA-N	7-chloro-4,6-dimethoxy-3'-methylspiro[1-benzofuran-2,2'-cyclohexane]-1',3-dione
626596	Spiro[benzofuran-2(3H),1'-cyclohexane]-2',3,4'-trione, 7-chloro-4,6-dimethoxy-3',3',6'-trimethyl-	366.8	C18H19ClO6	CC1CC(=O)C(C(=O)C12C(=O)C3=C(O2)C(=C(C=C3OC)OC)Cl)(C)C	PWLHVTJCMHHDOD-UHFFFAOYSA-N	7-chloro-4,6-dimethoxy-2',2',5'-trimethylspiro[1-benzofuran-2,4'-cyclohexane]-1',3,3'-trione
629676	Spiro[benzofuran-2(3H),1'-cyclohexane]-3,4'-dione, 7-chloro-4,6-dimethoxy-2'-methyl-	324.75	C16H17ClO5	CC1CC(=O)CCC12C(=O)C3=C(O2)C(=C(C=C3OC)OC)Cl	SHZYVBKVXCQBLF-UHFFFAOYSA-N	7-chloro-4,6-dimethoxy-3'-methylspiro[1-benzofuran-2,4'-cyclohexane]-1',3-dione
630845	Spiro[benzofuran-2(3H),1'-cyclohexane]-2',3,4'-trione, 7-chloro-4,6-dimethoxy-6'-methyl-	338.74	C16H15ClO6	CC1CC(=O)CC(=O)C12C(=O)C3=C(O2)C(=C(C=C3OC)OC)Cl	YIQRSAKVWZVLDN-UHFFFAOYSA-N	7-chloro-4,6-dimethoxy-5'-methylspiro[1-benzofuran-2,4'-cyclohexane]-1',3,3'-trione
631655	Griseophenone	350.7	C17H15ClO6	CC1=CC(=O)C=C(C12C(=O)C3=C(O2)C(=C(C=C3OC)OC)Cl)OC	ISLYVROQSJYFAZ-UHFFFAOYSA-N	7-chloro-3',4,6-trimethoxy-5'-methylspiro[1-benzofuran-2,4'-cyclohexa-2,5-diene]-1',3-dione
941385	(2S,6'R)-7-chloro-2',4,6-trimethoxy-6'-methyl-3H-spiro[1-benzofuran-2,1'-cyclohexan]-2'-ene-3,4'-dione	352.8	C17H17ClO6	C[C@H]1CC(=O)C=C([C@@]12C(=O)C3=C(O2)C(=C(C=C3OC)OC)Cl)OC	DDUHZTYCFQRHIY-WNWIJWBNSA-N	(2R,5'S)-7-chloro-3',4,6-trimethoxy-5'-methylspiro[1-benzofuran-2,4'-cyclohex-2-ene]-1',3-dione
978391	(2S,5'S)-7-chloro-3',4,6-trimethoxy-5'-methylspiro[1-benzofuran-2,4'-cyclohex-2-ene]-1',3-dione	352.8	C17H17ClO6	C[C@H]1CC(=O)C=C([C@]12C(=O)C3=C(O2)C(=C(C=C3OC)OC)Cl)OC	DDUHZTYCFQRHIY-QPFGOUBPSA-N	(2S,5'S)-7-chloro-3',4,6-trimethoxy-5'-methylspiro[1-benzofuran-2,4'-cyclohex-2-ene]-1',3-dione
978395	(2R,5'R)-7-chloro-3',4,6-trimethoxy-5'-methylspiro[1-benzofuran-2,4'-cyclohex-2-ene]-1',3-dione	352.8	C17H17ClO6	C[C@@H]1CC(=O)C=C([C@@]12C(=O)C3=C(O2)C(=C(C=C3OC)OC)Cl)OC	DDUHZTYCFQRHIY-CQLKUDPESA-N	(2R,5'R)-7-chloro-3',4,6-trimethoxy-5'-methylspiro[1-benzofuran-2,4'-cyclohex-2-ene]-1',3-dione
3082005	Dehydrogriseofulvin	350.7	C17H15ClO6	CC1=CC(=O)C=C([C@]12C(=O)C3=C(O2)C(=C(C=C3OC)OC)Cl)OC	ISLYVROQSJYFAZ-KRWDZBQOSA-N	(2S)-7-chloro-3',4,6-trimethoxy-5'-methylspiro[1-benzofuran-2,4'-cyclohexa-2,5-diene]-1',3-dione
4125561	7-Chloro-4'-hydroxy-2',4,6-trimethoxy-6'-methyl-3H-spiro[benzofuran-2,1'-cyclohex[2]EN]-3-one	354.8	C17H19ClO6	CC1CC(C=C(C12C(=O)C3=C(O2)C(=C(C=C3OC)OC)Cl)OC)O	QDNCNBBKBODBDR-UHFFFAOYSA-N	7-chloro-3'-hydroxy-1',4,6-trimethoxy-5'-methylspiro[1-benzofuran-2,6'-cyclohexene]-3-one
5126442	7-Chloro-3'-hydroxy-4,6-dimethoxy-5'-methylspiro[1-benzofuran-2,4'-cyclohex-2-ene]-1',3-dione	338.74	C16H15ClO6	CC1CC(=O)C=C(C12C(=O)C3=C(O2)C(=C(C=C3OC)OC)Cl)O	KUTVEHNZHKAAAO-UHFFFAOYSA-N	7-chloro-3'-hydroxy-4,6-dimethoxy-5'-methylspiro[1-benzofuran-2,4'-cyclohex-2-ene]-1',3-dione
5702061	(5'R)-7-chloro-3',4,6-trimethoxy-5'-methylspiro[1-benzofuran-2,4'-cyclohex-2-ene]-1',3-dione	352.8	C17H17ClO6	C[C@@H]1CC(=O)C=C(C12C(=O)C3=C(O2)C(=C(C=C3OC)OC)Cl)OC	DDUHZTYCFQRHIY-OEWHWVHBSA-N	(5'R)-7-chloro-3',4,6-trimethoxy-5'-methylspiro[1-benzofuran-2,4'-cyclohex-2-ene]-1',3-dione
6452395	Desmethylgriseofulvin	338.74	C16H15ClO6	CC1CC(=O)C=C(C12C(=O)C3=C(O2)C(=C(C=C3O)OC)Cl)OC	KTICLSBYPHKDMM-UHFFFAOYSA-N	7-chloro-4-hydroxy-3',6-dimethoxy-5'-methylspiro[1-benzofuran-2,4'-cyclohex-2-ene]-1',3-dione
6604225	(2S,3'S,5'R)-7-chloro-3',4,6-trimethoxy-5'-methylspiro[1-benzofuran-2,4'-cyclohexane]-1',3-dione	354.8	C17H19ClO6	C[C@@H]1CC(=O)C[C@@H]([C@]12C(=O)C3=C(O2)C(=C(C=C3OC)OC)Cl)OC	IIUZTXTZRGLYTI-DSISRMJSSA-N	(2S,3'S,5'R)-7-chloro-3',4,6-trimethoxy-5'-methylspiro[1-benzofuran-2,4'-cyclohexane]-1',3-dione
6713927	(2S,5'R)-7-chloro-3',4,6-trimethoxy-5'-methylspiro[benzofuran-2,4'-cyclohexane]-1',3-dione	354.8	C17H19ClO6	C[C@@H]1CC(=O)CC([C@]12C(=O)C3=C(O2)C(=C(C=C3OC)OC)Cl)OC	IIUZTXTZRGLYTI-LKUJNTHKSA-N	(2S,5'R)-7-chloro-3',4,6-trimethoxy-5'-methylspiro[1-benzofuran-2,4'-cyclohexane]-1',3-dione
9974417	6-O-Demethyl Griseofulvin	338.74	C16H15ClO6	C[C@@H]1CC(=O)C=C([C@]12C(=O)C3=C(C=C(C(=C3O2)Cl)O)OC)OC	SYNGDIBHUPXIQA-QZTNRIJFSA-N	(2S,5'R)-7-chloro-6-hydroxy-3',4-dimethoxy-5'-methylspiro[1-benzofuran-2,4'-cyclohex-2-ene]-1',3-dione
10019062	(2S,6'R)-2',4-Dimethoxy-6'beta-methyl-7-chlorospiro[benzofuran-2(3H),1'-[2]cyclohexene]-3,4'-dione	322.74	C16H15ClO5	C[C@@H]1CC(=O)C=C([C@]12C(=O)C3=C(C=CC(=C3O2)Cl)OC)OC	KWMQBKSSIZJZMJ-BCTVWOGZSA-N	(2S,5'R)-7-chloro-3',4-dimethoxy-5'-methylspiro[1-benzofuran-2,4'-cyclohex-2-ene]-1',3-dione
10045461	(2S,6'R)-2',4,5,6-Tetramethoxy-6'beta-methyl-7-chlorospiro[benzofuran-2(3H),1'-[2]cyclohexene]-3,4'-dione	382.8	C18H19ClO7	C[C@@H]1CC(=O)C=C([C@]12C(=O)C3=C(O2)C(=C(C(=C3OC)OC)OC)Cl)OC	NECORMMYWASPKR-CVJBHZAOSA-N	(2S,5'R)-7-chloro-3',4,5,6-tetramethoxy-5'-methylspiro[1-benzofuran-2,4'-cyclohex-2-ene]-1',3-dione
10406626	(2S,6'R)-2',4,6-Trimethoxy-5,6'beta-dimethyl-7-chlorospiro[benzofuran-2(3H),1'-[2]cyclohexene]-3,4'-dione	366.8	C18H19ClO6	C[C@@H]1CC(=O)C=C([C@]12C(=O)C3=C(O2)C(=C(C(=C3OC)C)OC)Cl)OC	OZBDUPFSHYEYFW-CVJBHZAOSA-N	(2S,5'R)-7-chloro-3',4,6-trimethoxy-5,5'-dimethylspiro[1-benzofuran-2,4'-cyclohex-2-ene]-1',3-dione
10407853	5-Chlorogriseofulvin	387.2	C17H16Cl2O6	C[C@@H]1CC(=O)C=C([C@]12C(=O)C3=C(O2)C(=C(C(=C3OC)Cl)OC)Cl)OC	VOYKFNUPFUJNKL-GJEGPGMTSA-N	(2S,5'R)-5,7-dichloro-3',4,6-trimethoxy-5'-methylspiro[1-benzofuran-2,4'-cyclohex-2-ene]-1',3-dione
10497262	(2R,6'R)-2'-(Methylthio)-4-methoxy-6'beta-methyl-7-chlorospiro[benzofuran-2(3H),1'-[2]cyclohexene]-3,4'-dione	338.8	C16H15ClO4S	C[C@@H]1CC(=O)C=C([C@]12C(=O)C3=C(C=CC(=C3O2)Cl)OC)SC	UMKOQPNALXEWHO-BCTVWOGZSA-N	(2R,5'R)-7-chloro-4-methoxy-5'-methyl-3'-methylsulfanylspiro[1-benzofuran-2,4'-cyclohex-2-ene]-1',3-dione
10574693	(2S,5'S)-7-chloro-4,6-dimethoxy-3'-methylsulfanyl-5'-phenylspiro[1-benzofuran-2,4'-cyclohex-2-ene]-1',3-dione	430.9	C22H19ClO5S	COC1=CC(=C(C2=C1C(=O)[C@@]3(O2)[C@@H](CC(=O)C=C3SC)C4=CC=CC=C4)Cl)OC	FDCODSDXUSLAEJ-RCDICMHDSA-N	(2S,5'S)-7-chloro-4,6-dimethoxy-3'-methylsulfanyl-5'-phenylspiro[1-benzofuran-2,4'-cyclohex-2-ene]-1',3-dione
10596108	(2S,5'R)-7-chloro-3'-ethylsulfanyl-4,6-dimethoxy-5'-methylspiro[1-benzofuran-2,4'-cyclohex-2-ene]-1',3-dione	382.9	C18H19ClO5S	CCSC1=CC(=O)C[C@H]([C@]12C(=O)C3=C(O2)C(=C(C=C3OC)OC)Cl)C	ZZTHRMLYTFHFIP-DYBLOJMWSA-N	(2S,5'R)-7-chloro-3'-ethylsulfanyl-4,6-dimethoxy-5'-methylspiro[1-benzofuran-2,4'-cyclohex-2-ene]-1',3-dione
10619960	(2R,6'R)-2'-(Methylthio)-4,6-dimethoxy-5,6'beta-dimethyl-7-chlorospiro[benzofuran-2(3H),1'-[2]cyclohexene]-3,4'-dione	382.9	C18H19ClO5S	C[C@@H]1CC(=O)C=C([C@]12C(=O)C3=C(O2)C(=C(C(=C3OC)C)OC)Cl)SC	LPIAMNJEBVGECE-CVJBHZAOSA-N	(2R,5'R)-7-chloro-4,6-dimethoxy-5,5'-dimethyl-3'-methylsulfanylspiro[1-benzofuran-2,4'-cyclohex-2-ene]-1',3-dione
10621755	(2S,5'S)-7-chloro-3',4,6-trimethoxy-5'-phenylspiro[1-benzofuran-2,6'-cyclohex-2-ene]-1',3-dione	414.8	C22H19ClO6	COC1=CC(=O)[C@@]2([C@@H](C1)C3=CC=CC=C3)C(=O)C4=C(O2)C(=C(C=C4OC)OC)Cl	FWXVCIKGJWNYCI-FPTDNZKUSA-N	(2S,5'S)-7-chloro-3',4,6-trimethoxy-5'-phenylspiro[1-benzofuran-2,6'-cyclohex-2-ene]-1',3-dione
10623284	(2R,5'S)-7-chloro-4,6-dimethoxy-3'-methylsulfinyl-5'-phenylspiro[1-benzofuran-2,4'-cyclohex-2-ene]-1',3-dione	446.9	C22H19ClO6S	COC1=CC(=C(C2=C1C(=O)[C@]3(O2)[C@@H](CC(=O)C=C3S(=O)C)C4=CC=CC=C4)Cl)OC	FRMRENYQXMEWSX-MIDGXRAASA-N	(2R,5'S)-7-chloro-4,6-dimethoxy-3'-methylsulfinyl-5'-phenylspiro[1-benzofuran-2,4'-cyclohex-2-ene]-1',3-dione
10642700	(2S,6'R)-7-Chloro-2',4,6-trimethoxy-6'-ethylspiro[benzofuran-2(3H),1'-[2]cyclohexene]-3,4'-dione	366.8	C18H19ClO6	CC[C@@H]1CC(=O)C=C([C@]12C(=O)C3=C(O2)C(=C(C=C3OC)OC)Cl)OC	SELNQQUJXLLOII-LZVRBXCZSA-N	(2S,5'R)-7-chloro-5'-ethyl-3',4,6-trimethoxyspiro[1-benzofuran-2,4'-cyclohex-2-ene]-1',3-dione
10643661	(2R,5'R)-7-chloro-5'-ethyl-4,6-dimethoxy-3'-methylsulfanylspiro[1-benzofuran-2,4'-cyclohex-2-ene]-1',3-dione	382.9	C18H19ClO5S	CC[C@@H]1CC(=O)C=C([C@]12C(=O)C3=C(O2)C(=C(C=C3OC)OC)Cl)SC	DTEONYQXPRTMKP-LZVRBXCZSA-N	(2R,5'R)-7-chloro-5'-ethyl-4,6-dimethoxy-3'-methylsulfanylspiro[1-benzofuran-2,4'-cyclohex-2-ene]-1',3-dione
10668598	(2S,5'R)-7-chloro-3'-ethylsulfinyl-4,6-dimethoxy-5'-methylspiro[1-benzofuran-2,4'-cyclohex-2-ene]-1',3-dione	398.9	C18H19ClO6S	CCS(=O)C1=CC(=O)C[C@H]([C@]12C(=O)C3=C(O2)C(=C(C=C3OC)OC)Cl)C	BTQCAINGBIGWID-WFKPOPTESA-N	(2S,5'R)-7-chloro-3'-ethylsulfinyl-4,6-dimethoxy-5'-methylspiro[1-benzofuran-2,4'-cyclohex-2-ene]-1',3-dione
10687333	(2S,6'R)-2',6-Dimethoxy-6'beta-methyl-7-chlorospiro[benzofuran-2(3H),1'-[2]cyclohexene]-3,4'-dione	322.74	C16H15ClO5	C[C@@H]1CC(=O)C=C([C@]12C(=O)C3=C(O2)C(=C(C=C3)OC)Cl)OC	XKOIOOKZEAEGSO-BCTVWOGZSA-N	(2S,5'R)-7-chloro-3',6-dimethoxy-5'-methylspiro[1-benzofuran-2,4'-cyclohex-2-ene]-1',3-dione
10690292	7-Chloro-3'-ethoxy-4,6-dimethoxy-5'-methylspiro[1-benzofuran-2,4'-cyclohex-2-ene]-1',3-dione	366.8	C18H19ClO6	CCOC1=CC(=O)CC(C12C(=O)C3=C(O2)C(=C(C=C3OC)OC)Cl)C	VHXBNOUUDLLFER-UHFFFAOYSA-N	7-chloro-3'-ethoxy-4,6-dimethoxy-5'-methylspiro[1-benzofuran-2,4'-cyclohex-2-ene]-1',3-dione
10691346	(2R)-4,6-Dimethoxy-4'-(ethylthio)-6'beta-methyl-7-chlorospiro[benzofuran-2(3H),1'-[3]cyclohexene]-2',3-dione	382.9	C18H19ClO5S	CCSC1=CC(=O)[C@]2([C@@H](C1)C)C(=O)C3=C(O2)C(=C(C=C3OC)OC)Cl	BGCHGRUQZMWCET-DYBLOJMWSA-N	(2R,5'R)-7-chloro-3'-ethylsulfanyl-4,6-dimethoxy-5'-methylspiro[1-benzofuran-2,6'-cyclohex-2-ene]-1',3-dione
10691458	(2S,5'R)-7-chloro-4,6-dimethoxy-5'-methyl-3'-methylsulfinylspiro[1-benzofuran-2,4'-cyclohex-2-ene]-1',3-dione	384.8	C17H17ClO6S	C[C@@H]1CC(=O)C=C([C@@]12C(=O)C3=C(O2)C(=C(C=C3OC)OC)Cl)S(=O)C	AOSLJCRNQADIPD-YXUOZMEDSA-N	(2S,5'R)-7-chloro-4,6-dimethoxy-5'-methyl-3'-methylsulfinylspiro[1-benzofuran-2,4'-cyclohex-2-ene]-1',3-dione
10693960	(2R,5'S)-7-chloro-4,6-dimethoxy-3'-methylsulfanyl-5'-phenylspiro[1-benzofuran-2,4'-cyclohex-2-ene]-1',3-dione	430.9	C22H19ClO5S	COC1=CC(=C(C2=C1C(=O)[C@]3(O2)[C@@H](CC(=O)C=C3SC)C4=CC=CC=C4)Cl)OC	FDCODSDXUSLAEJ-FPTDNZKUSA-N	(2R,5'S)-7-chloro-4,6-dimethoxy-3'-methylsulfanyl-5'-phenylspiro[1-benzofuran-2,4'-cyclohex-2-ene]-1',3-dione
10712095	(2R,6'R)-2'-(Methylthio)-6-methoxy-6'beta-methyl-7-chlorospiro[benzofuran-2(3H),1'-[2]cyclohexene]-3,4'-dione	338.8	C16H15ClO4S	C[C@@H]1CC(=O)C=C([C@]12C(=O)C3=C(O2)C(=C(C=C3)OC)Cl)SC	ZEQJGGMNWNZBGL-BCTVWOGZSA-N	(2R,5'R)-7-chloro-6-methoxy-5'-methyl-3'-methylsulfanylspiro[1-benzofuran-2,4'-cyclohex-2-ene]-1',3-dione
10715802	(2S,5'R)-7-chloro-5'-ethyl-3'-ethylsulfanyl-4,6-dimethoxyspiro[1-benzofuran-2,6'-cyclohex-2-ene]-1',3-dione	396.9	C19H21ClO5S	CC[C@@H]1CC(=CC(=O)[C@]12C(=O)C3=C(O2)C(=C(C=C3OC)OC)Cl)SCC	RNLOZDJLCYZWDU-DGIBIBHMSA-N	(2S,5'R)-7-chloro-5'-ethyl-3'-ethylsulfanyl-4,6-dimethoxyspiro[1-benzofuran-2,6'-cyclohex-2-ene]-1',3-dione
10761572	7-Chloro-4,6-dimethoxy-6'-methyl-2'-(methylthio)-spiro(benzofuran-2(3H),1'-(2)cyclohexene)-3,4'-dione, cis-(+/-)-	368.8	C17H17ClO5S	C[C@@H]1CC(=O)C=C([C@@]12C(=O)C3=C(O2)C(=C(C=C3OC)OC)Cl)SC	DCCZLOASKLQMQQ-CQLKUDPESA-N	(2S,5'R)-7-chloro-4,6-dimethoxy-5'-methyl-3'-methylsulfanylspiro[1-benzofuran-2,4'-cyclohex-2-ene]-1',3-dione
10763672	(2R,6'R)-2'-(Methylthio)-4,6-dimethoxy-5,7-dichloro-6'beta-methylspiro[benzofuran-2(3H),1'-[2]cyclohexene]-3,4'-dione	403.3	C17H16Cl2O5S	C[C@@H]1CC(=O)C=C([C@]12C(=O)C3=C(O2)C(=C(C(=C3OC)Cl)OC)Cl)SC	PJWSSDRPWRGFCQ-GJEGPGMTSA-N	(2R,5'R)-5,7-dichloro-4,6-dimethoxy-5'-methyl-3'-methylsulfanylspiro[1-benzofuran-2,4'-cyclohex-2-ene]-1',3-dione
10785158	(2S,5'R)-7-chloro-5'-ethyl-3',4,6-trimethoxyspiro[1-benzofuran-2,6'-cyclohex-2-ene]-1',3-dione	366.8	C18H19ClO6	CC[C@@H]1CC(=CC(=O)[C@]12C(=O)C3=C(O2)C(=C(C=C3OC)OC)Cl)OC	KKOGARJUYCNIGF-LZVRBXCZSA-N	(2S,5'R)-7-chloro-5'-ethyl-3',4,6-trimethoxyspiro[1-benzofuran-2,6'-cyclohex-2-ene]-1',3-dione
10787864	(2R,5'R)-7-chloro-5'-ethyl-3'-ethylsulfinyl-4,6-dimethoxyspiro[1-benzofuran-2,4'-cyclohex-2-ene]-1',3-dione	412.9	C19H21ClO6S	CC[C@@H]1CC(=O)C=C([C@]12C(=O)C3=C(O2)C(=C(C=C3OC)OC)Cl)S(=O)CC	TYASYPMDFGADRK-FNBWHOKESA-N	(2R,5'R)-7-chloro-5'-ethyl-3'-ethylsulfinyl-4,6-dimethoxyspiro[1-benzofuran-2,4'-cyclohex-2-ene]-1',3-dione
10787978	(2S)-2',4,6-Trimethoxy-6'beta-phenyl-7-chlorospiro[benzofuran-2(3H),1'-[2]cyclohexene]-3,4'-dione	414.8	C22H19ClO6	COC1=CC(=C(C2=C1C(=O)[C@]3(O2)[C@@H](CC(=O)C=C3OC)C4=CC=CC=C4)Cl)OC	KGXLNYUXCCSYAP-FPTDNZKUSA-N	(2S,5'S)-7-chloro-3',4,6-trimethoxy-5'-phenylspiro[1-benzofuran-2,4'-cyclohex-2-ene]-1',3-dione
10810786	(2R)-2'-(Ethylthio)-4,6-dimethoxy-6'beta-ethyl-7-chlorospiro[benzofuran-2(3H),1'-[2]cyclohexene]-3,4'-dione	396.9	C19H21ClO5S	CC[C@@H]1CC(=O)C=C([C@]12C(=O)C3=C(O2)C(=C(C=C3OC)OC)Cl)SCC	YALUYCXNVPWUKO-DGIBIBHMSA-N	(2R,5'R)-7-chloro-5'-ethyl-3'-ethylsulfanyl-4,6-dimethoxyspiro[1-benzofuran-2,4'-cyclohex-2-ene]-1',3-dione
10810923	(2R,5'R)-7-chloro-5'-ethyl-4,6-dimethoxy-3'-methylsulfinylspiro[1-benzofuran-2,4'-cyclohex-2-ene]-1',3-dione	398.9	C18H19ClO6S	CC[C@@H]1CC(=O)C=C([C@]12C(=O)C3=C(O2)C(=C(C=C3OC)OC)Cl)S(=O)C	BNCQTUMFSJPTOG-DJWBADGCSA-N	(2R,5'R)-7-chloro-5'-ethyl-4,6-dimethoxy-3'-methylsulfinylspiro[1-benzofuran-2,4'-cyclohex-2-ene]-1',3-dione
10837041	(2R)-2'-(Ethylthio)-4,6-dimethoxy-6'beta-phenyl-7-chlorospiro[benzofuran-2(3H),1'-[2]cyclohexene]-3,4'-dione	444.9	C23H21ClO5S	CCSC1=CC(=O)C[C@H]([C@@]12C(=O)C3=C(O2)C(=C(C=C3OC)OC)Cl)C4=CC=CC=C4	FGEYQEXCLQWGLT-WNSKOXEYSA-N	(2R,5'S)-7-chloro-3'-ethylsulfanyl-4,6-dimethoxy-5'-phenylspiro[1-benzofuran-2,4'-cyclohex-2-ene]-1',3-dione
11603327	(2S)-7-chloro-4,6-dimethoxy-5'-methyl-3'-propoxyspiro[1-benzofuran-2,4'-cyclohex-2-ene]-1',3-dione	380.8	C19H21ClO6	CCCOC1=CC(=O)CC([C@@]12C(=O)C3=C(O2)C(=C(C=C3OC)OC)Cl)C	CFOHRWBARJOUIP-JLNKLDRZSA-N	(2S)-7-chloro-4,6-dimethoxy-5'-methyl-3'-propoxyspiro[1-benzofuran-2,4'-cyclohex-2-ene]-1',3-dione
11794329	(2S,5'R)-7-chloro-5'-ethyl-4,6-dimethoxy-3'-methylsulfanylspiro[1-benzofuran-2,4'-cyclohex-2-ene]-1',3-dione	382.9	C18H19ClO5S	CC[C@@H]1CC(=O)C=C([C@@]12C(=O)C3=C(O2)C(=C(C=C3OC)OC)Cl)SC	DTEONYQXPRTMKP-DYBLOJMWSA-N	(2S,5'R)-7-chloro-5'-ethyl-4,6-dimethoxy-3'-methylsulfanylspiro[1-benzofuran-2,4'-cyclohex-2-ene]-1',3-dione
13735050	7-Chloro-2-[(2-hydroxy-3-oxo-5-propan-2-ylcyclohepta-1,4,6-trien-1-yl)-(4-methoxyphenyl)methyl]-4,6-dimethoxy-1-benzofuran-3-one	511	C28H27ClO7	CC(C)C1=CC(=O)C(=C(C=C1)C(C2C(=O)C3=C(O2)C(=C(C=C3OC)OC)Cl)C4=CC=C(C=C4)OC)O	OSJRZMYTBINECU-UHFFFAOYSA-N	7-chloro-2-[(2-hydroxy-3-oxo-5-propan-2-ylcyclohepta-1,4,6-trien-1-yl)-(4-methoxyphenyl)methyl]-4,6-dimethoxy-1-benzofuran-3-one
14067764	ethyl 2-[4-[(Z)-(7-chloro-4,6-dimethoxy-3-oxo-1-benzofuran-2-ylidene)methyl]phenoxy]-2-methylpropanoate	446.9	C23H23ClO7	CCOC(=O)C(C)(C)OC1=CC=C(C=C1)/C=C\\2/C(=O)C3=C(O2)C(=C(C=C3OC)OC)Cl	PQBZHUJYZBRYTM-BOPFTXTBSA-N	ethyl 2-[4-[(Z)-(7-chloro-4,6-dimethoxy-3-oxo-1-benzofuran-2-ylidene)methyl]phenoxy]-2-methylpropanoate
14565581	(2S,6'R)-7-Chloro-4,6-dimethoxy-6'-methylspiro[benzofuran-2(3H),1'-[2]cyclohexene]-3,4'-dione	322.74	C16H15ClO5	C[C@@H]1CC(=O)C=C[C@]12C(=O)C3=C(O2)C(=C(C=C3OC)OC)Cl	HVPYSAOMOUOPRL-VPTHRUTESA-N	(2S,5'R)-7-chloro-4,6-dimethoxy-5'-methylspiro[1-benzofuran-2,4'-cyclohex-2-ene]-1',3-dione
14565583	(3'R,5'R)-7-chloro-4,6-dimethoxy-3',5'-dimethylspiro[1-benzofuran-2,4'-cyclohexane]-1',3-dione	338.8	C17H19ClO5	C[C@@H]1CC(=O)C[C@H](C12C(=O)C3=C(O2)C(=C(C=C3OC)OC)Cl)C	SEJIULWQYHLORG-RKDXNWHRSA-N	(3'R,5'R)-7-chloro-4,6-dimethoxy-3',5'-dimethylspiro[1-benzofuran-2,4'-cyclohexane]-1',3-dione
14565584	(3'R,5'S)-7-chloro-4,6-dimethoxy-3',5'-dimethylspiro[1-benzofuran-2,4'-cyclohexane]-1',3-dione	338.8	C17H19ClO5	C[C@@H]1CC(=O)C[C@@H](C12C(=O)C3=C(O2)C(=C(C=C3OC)OC)Cl)C	SEJIULWQYHLORG-LKQKLGIQSA-N	(3'R,5'S)-7-chloro-4,6-dimethoxy-3',5'-dimethylspiro[1-benzofuran-2,4'-cyclohexane]-1',3-dione
14565585	(2S,6'R)-7-Chloro-4,6-dimethoxy-2',6'-dimethylspiro[benzofuran-2(3H),1'-[2]cyclohexene]-3,4'-dione	336.8	C17H17ClO5	C[C@@H]1CC(=O)C=C([C@]12C(=O)C3=C(O2)C(=C(C=C3OC)OC)Cl)C	MHGHFPYONBUSLO-VVVCHXIZSA-N	(2S,5'R)-7-chloro-4,6-dimethoxy-3',5'-dimethylspiro[1-benzofuran-2,4'-cyclohex-2-ene]-1',3-dione
14565587	(2S,5'R)-3'-(bromomethyl)-7-chloro-4,6-dimethoxy-5'-methylspiro[1-benzofuran-2,4'-cyclohex-2-ene]-1',3-dione	415.7	C17H16BrClO5	C[C@@H]1CC(=O)C=C([C@]12C(=O)C3=C(O2)C(=C(C=C3OC)OC)Cl)CBr	PPGYUMAQYLTGQL-RBHXEPJQSA-N	(2S,5'R)-3'-(bromomethyl)-7-chloro-4,6-dimethoxy-5'-methylspiro[1-benzofuran-2,4'-cyclohex-2-ene]-1',3-dione
14565589	(2S,5'S,6'R)-6'-bromo-3'-(bromomethyl)-7-chloro-4,6-dimethoxy-5'-methylspiro[1-benzofuran-2,4'-cyclohex-2-ene]-1',3-dione	494.6	C17H15Br2ClO5	C[C@@H]1[C@H](C(=O)C=C([C@]12C(=O)C3=C(O2)C(=C(C=C3OC)OC)Cl)CBr)Br	CXQROVHOJVVOLR-YYNXVVIESA-N	(2S,5'S,6'R)-6'-bromo-3'-(bromomethyl)-7-chloro-4,6-dimethoxy-5'-methylspiro[1-benzofuran-2,4'-cyclohex-2-ene]-1',3-dione
14589751	(2Z)-7-Chloro-2-ethylidene-4,6-dimethoxybenzofuran-3(2H)-one	254.66	C12H11ClO4	C/C=C\\1/C(=O)C2=C(O1)C(=C(C=C2OC)OC)Cl	PLYRJIAIVQTTOE-XQRVVYSFSA-N	(2Z)-7-chloro-2-ethylidene-4,6-dimethoxy-1-benzofuran-3-one
14589753	(2Z)-7-Chloro-4,6-dimethoxy-2-propylidenebenzofuran-3(2H)-one	268.69	C13H13ClO4	CC/C=C\\1/C(=O)C2=C(O1)C(=C(C=C2OC)OC)Cl	WYTNIQXZBNSDRQ-ALCCZGGFSA-N	(2Z)-7-chloro-4,6-dimethoxy-2-propylidene-1-benzofuran-3-one
14589759	7-chloro-4,6-dimethoxy-2-methylene-3(2H)-benzofuranone	240.64	C11H9ClO4	COC1=CC(=C(C2=C1C(=O)C(=C)O2)Cl)OC	OJKPSWMAZUPITN-UHFFFAOYSA-N	7-chloro-4,6-dimethoxy-2-methylidene-1-benzofuran-3-one
14589761	7-Chloro-6',6'-dimethyl-2',4,6-trimethoxyspiro[benzofuran-2(3H),1'-[2]cyclohexene]-3,4'-dione	366.8	C18H19ClO6	CC1(CC(=O)C=C(C12C(=O)C3=C(O2)C(=C(C=C3OC)OC)Cl)OC)C	IQQZDYZOWIUKLD-UHFFFAOYSA-N	7-chloro-3',4,6-trimethoxy-5',5'-dimethylspiro[1-benzofuran-2,4'-cyclohex-2-ene]-1',3-dione
14706665	7-Chloro-4,6-dimethoxy-6'-methyl-2'-(methylthio)-spiro(benzofuran-2(3H),1'-(2)cyclohexene)-3,4'-dione, trans-(+/-)-	368.8	C17H17ClO5S	C[C@@H]1CC(=O)C=C([C@]12C(=O)C3=C(O2)C(=C(C=C3OC)OC)Cl)SC	DCCZLOASKLQMQQ-RBHXEPJQSA-N	(2R,5'R)-7-chloro-4,6-dimethoxy-5'-methyl-3'-methylsulfanylspiro[1-benzofuran-2,4'-cyclohex-2-ene]-1',3-dione
14737140	2-Phenyl-methylene-7-chloro-4,6-dimethoxy-3(2H)-benzofuranone	316.7	C17H13ClO4	COC1=CC(=C(C2=C1C(=O)/C(=C/C3=CC=CC=C3)/O2)Cl)OC	ROZXRVHHHIEKOW-JYRVWZFOSA-N	(2Z)-2-benzylidene-7-chloro-4,6-dimethoxy-1-benzofuran-3-one
14760418	2,2-Bis(hydroxymethyl)-4,6-dimethoxy-7-chlorobenzofuran-3(2H)-one	288.68	C12H13ClO6	COC1=CC(=C(C2=C1C(=O)C(O2)(CO)CO)Cl)OC	YZTTXHKYZWUODG-UHFFFAOYSA-N	7-chloro-2,2-bis(hydroxymethyl)-4,6-dimethoxy-1-benzofuran-3-one
15086460	4'-O-Demethyl Griseofulvin	338.74	C16H15ClO6	C[C@@H]1CC(=O)C=C([C@]12C(=O)C3=C(O2)C(=C(C=C3OC)OC)Cl)O	KUTVEHNZHKAAAO-QZTNRIJFSA-N	(2S,5'R)-7-chloro-3'-hydroxy-4,6-dimethoxy-5'-methylspiro[1-benzofuran-2,4'-cyclohex-2-ene]-1',3-dione
20841686	(2S)-7-chloro-4-hydroxy-3',6-dimethoxy-5'-methylspiro[1-benzofuran-2,4'-cyclohex-2-ene]-1',3-dione	338.74	C16H15ClO6	CC1CC(=O)C=C([C@]12C(=O)C3=C(O2)C(=C(C=C3O)OC)Cl)OC	KTICLSBYPHKDMM-CGGQJNRTSA-N	(2S)-7-chloro-4-hydroxy-3',6-dimethoxy-5'-methylspiro[1-benzofuran-2,4'-cyclohex-2-ene]-1',3-dione
21123948	(2S)-7-chloro-6-hydroxy-3',4-dimethoxy-5'-methylspiro[1-benzofuran-2,4'-cyclohex-2-ene]-1',3-dione	338.74	C16H15ClO6	CC1CC(=O)C=C([C@]12C(=O)C3=C(C=C(C(=C3O2)Cl)O)OC)OC	SYNGDIBHUPXIQA-CGGQJNRTSA-N	(2S)-7-chloro-6-hydroxy-3',4-dimethoxy-5'-methylspiro[1-benzofuran-2,4'-cyclohex-2-ene]-1',3-dione
21629991	(2R,5'R)-7-chloro-2'-hydroxy-4,6-dimethoxy-3',5'-dimethylspiro[1-benzofuran-2,4'-cyclohex-2-ene]-1',3-dione	352.8	C17H17ClO6	C[C@@H]1CC(=O)C(=C([C@@]12C(=O)C3=C(O2)C(=C(C=C3OC)OC)Cl)C)O	MTQCZNHBXWMACK-IWEMQMMOSA-N	(2R,5'R)-7-chloro-2'-hydroxy-4,6-dimethoxy-3',5'-dimethylspiro[1-benzofuran-2,4'-cyclohex-2-ene]-1',3-dione
21677661	Isogriseofulvin	352.8	C17H17ClO6	C[C@@H]1CC(=CC(=O)[C@]12C(=O)C3=C(O2)C(=C(C=C3OC)OC)Cl)OC	FFKRWPQQTGWKIH-RBHXEPJQSA-N	(2S,5'R)-7-chloro-3',4,6-trimethoxy-5'-methylspiro[1-benzofuran-2,6'-cyclohex-2-ene]-1',3-dione
21677662	(2S,5'R)-7-chloro-4,6-dimethoxy-5'-methylspiro[1-benzofuran-2,6'-cyclohex-2-ene]-1',3-dione	322.74	C16H15ClO5	C[C@@H]1CC=CC(=O)[C@]12C(=O)C3=C(O2)C(=C(C=C3OC)OC)Cl	WCAAZXVCBHLGSE-BCTVWOGZSA-N	(2S,5'R)-7-chloro-4,6-dimethoxy-5'-methylspiro[1-benzofuran-2,6'-cyclohex-2-ene]-1',3-dione
21820746	7-Chloro-2'-hydroxy-4,5',6-trimethoxy-3'-methylspiro[1-benzofuran-2,4'-cyclohexa-2,5-diene]-1',3-dione	366.7	C17H15ClO7	CC1=C(C(=O)C=C(C12C(=O)C3=C(O2)C(=C(C=C3OC)OC)Cl)OC)O	WYNWIUYPXBYPAX-UHFFFAOYSA-N	7-chloro-2'-hydroxy-4,5',6-trimethoxy-3'-methylspiro[1-benzofuran-2,4'-cyclohexa-2,5-diene]-1',3-dione
22216755	(2S)-5,7-dichloro-3',4,6-trimethoxy-5'-methylspiro[1-benzofuran-2,4'-cyclohex-2-ene]-1',3-dione	387.2	C17H16Cl2O6	CC1CC(=O)C=C([C@]12C(=O)C3=C(O2)C(=C(C(=C3OC)Cl)OC)Cl)OC	VOYKFNUPFUJNKL-PWQURCTCSA-N	(2S)-5,7-dichloro-3',4,6-trimethoxy-5'-methylspiro[1-benzofuran-2,4'-cyclohex-2-ene]-1',3-dione
23424082	7-Chloro-3'-ethoxy-4,6-dimethoxy-5'-methylspiro[1-benzofuran-2,6'-cyclohex-2-ene]-1',3-dione	366.8	C18H19ClO6	CCOC1=CC(=O)C2(C(C1)C)C(=O)C3=C(O2)C(=C(C=C3OC)OC)Cl	NIPIUEYPZWURFS-UHFFFAOYSA-N	7-chloro-3'-ethoxy-4,6-dimethoxy-5'-methylspiro[1-benzofuran-2,6'-cyclohex-2-ene]-1',3-dione
23424318	7-Chloro-4,6-dimethoxy-5'-methyl-3'-propoxyspiro[1-benzofuran-2,4'-cyclohex-2-ene]-1',3-dione	380.8	C19H21ClO6	CCCOC1=CC(=O)CC(C12C(=O)C3=C(O2)C(=C(C=C3OC)OC)Cl)C	CFOHRWBARJOUIP-UHFFFAOYSA-N	7-chloro-4,6-dimethoxy-5'-methyl-3'-propoxyspiro[1-benzofuran-2,4'-cyclohex-2-ene]-1',3-dione
23424319	7-Chloro-4,6-dimethoxy-5'-methyl-3'-propoxyspiro[1-benzofuran-2,6'-cyclohex-2-ene]-1',3-dione	380.8	C19H21ClO6	CCCOC1=CC(=O)C2(C(C1)C)C(=O)C3=C(O2)C(=C(C=C3OC)OC)Cl	JBUAXQJLEVDLMQ-UHFFFAOYSA-N	7-chloro-4,6-dimethoxy-5'-methyl-3'-propoxyspiro[1-benzofuran-2,6'-cyclohex-2-ene]-1',3-dione
23424320	3'-Butoxy-7-chloro-4,6-dimethoxy-5'-methylspiro[1-benzofuran-2,4'-cyclohex-2-ene]-1',3-dione	394.8	C20H23ClO6	CCCCOC1=CC(=O)CC(C12C(=O)C3=C(O2)C(=C(C=C3OC)OC)Cl)C	VYKVCWHSRHNRJY-UHFFFAOYSA-N	3'-butoxy-7-chloro-4,6-dimethoxy-5'-methylspiro[1-benzofuran-2,4'-cyclohex-2-ene]-1',3-dione
23424321	3'-Butoxy-7-chloro-4,6-dimethoxy-5'-methylspiro[1-benzofuran-2,6'-cyclohex-2-ene]-1',3-dione	394.8	C20H23ClO6	CCCCOC1=CC(=O)C2(C(C1)C)C(=O)C3=C(O2)C(=C(C=C3OC)OC)Cl	VIQPDEWXJRMOTI-UHFFFAOYSA-N	3'-butoxy-7-chloro-4,6-dimethoxy-5'-methylspiro[1-benzofuran-2,6'-cyclohex-2-ene]-1',3-dione
23424413	7-Chloro-3',6-diethoxy-4-methoxy-5'-methylspiro[1-benzofuran-2,4'-cyclohex-2-ene]-1',3-dione	380.8	C19H21ClO6	CCOC1=CC(=O)CC(C12C(=O)C3=C(O2)C(=C(C=C3OC)OCC)Cl)C	ANHLDWAKGVPKNR-UHFFFAOYSA-N	7-chloro-3',6-diethoxy-4-methoxy-5'-methylspiro[1-benzofuran-2,4'-cyclohex-2-ene]-1',3-dione
23424433	7-Chloro-3'-hexoxy-4,6-dimethoxy-5'-methylspiro[1-benzofuran-2,6'-cyclohex-2-ene]-1',3-dione	422.9	C22H27ClO6	CCCCCCOC1=CC(=O)C2(C(C1)C)C(=O)C3=C(O2)C(=C(C=C3OC)OC)Cl	NSIRTSHYKAUYQV-UHFFFAOYSA-N	7-chloro-3'-hexoxy-4,6-dimethoxy-5'-methylspiro[1-benzofuran-2,6'-cyclohex-2-ene]-1',3-dione
23424466	[3,4,5-Triacetyloxy-6-(7-chloro-4,6-dimethoxy-5'-methyl-3,3'-dioxospiro[1-benzofuran-2,6'-cyclohexene]-1'-yl)oxyoxan-2-yl]methyl acetate	669	C30H33ClO15	CC1CC(=O)C=C(C12C(=O)C3=C(O2)C(=C(C=C3OC)OC)Cl)OC4C(C(C(C(O4)COC(=O)C)OC(=O)C)OC(=O)C)OC(=O)C	JPUMREVAEBJASI-UHFFFAOYSA-N	[3,4,5-triacetyloxy-6-(7-chloro-4,6-dimethoxy-5'-methyl-3,3'-dioxospiro[1-benzofuran-2,6'-cyclohexene]-1'-yl)oxyoxan-2-yl]methyl acetate
23955821	7-Chloro-3'-hydroxy-4,6-dimethoxy-5'-methylspiro[1-benzofuran-2,6'-cyclohexa-2,4-diene]-1',3-dione	336.72	C16H13ClO6	CC1=CC(=CC(=O)C12C(=O)C3=C(O2)C(=C(C=C3OC)OC)Cl)O	ICZDZQIPOVIYEN-UHFFFAOYSA-N	7-chloro-3'-hydroxy-4,6-dimethoxy-5'-methylspiro[1-benzofuran-2,6'-cyclohexa-2,4-diene]-1',3-dione
25171426	(2S,5'R)-3'-butoxy-7-chloro-4,6-dimethoxy-5'-methylspiro[1-benzofuran-2,4'-cyclohex-2-ene]-1',3-dione	394.8	C20H23ClO6	CCCCOC1=CC(=O)C[C@H]([C@@]12C(=O)C3=C(O2)C(=C(C=C3OC)OC)Cl)C	VYKVCWHSRHNRJY-GIPWTMENSA-N	(2S,5'R)-3'-butoxy-7-chloro-4,6-dimethoxy-5'-methylspiro[1-benzofuran-2,4'-cyclohex-2-ene]-1',3-dione
25171427	(2S,5'R)-7-chloro-4,6-dimethoxy-5'-methyl-3'-pentoxyspiro[1-benzofuran-2,4'-cyclohex-2-ene]-1',3-dione	408.9	C21H25ClO6	CCCCCOC1=CC(=O)C[C@H]([C@@]12C(=O)C3=C(O2)C(=C(C=C3OC)OC)Cl)C	OVSVDTPXTGNTEA-GTJPDFRWSA-N	(2S,5'R)-7-chloro-4,6-dimethoxy-5'-methyl-3'-pentoxyspiro[1-benzofuran-2,4'-cyclohex-2-ene]-1',3-dione
25171428	(2S,5'R)-7-chloro-3'-hexoxy-4,6-dimethoxy-5'-methylspiro[1-benzofuran-2,4'-cyclohex-2-ene]-1',3-dione	422.9	C22H27ClO6	CCCCCCOC1=CC(=O)C[C@H]([C@@]12C(=O)C3=C(O2)C(=C(C=C3OC)OC)Cl)C	JIGCVYPLJSACEB-DMZKTXOQSA-N	(2S,5'R)-7-chloro-3'-hexoxy-4,6-dimethoxy-5'-methylspiro[1-benzofuran-2,4'-cyclohex-2-ene]-1',3-dione
25171429	(2S,5'R)-7-chloro-4,6-dimethoxy-5'-methyl-3'-pent-4-enoxyspiro[1-benzofuran-2,4'-cyclohex-2-ene]-1',3-dione	406.9	C21H23ClO6	C[C@@H]1CC(=O)C=C([C@]12C(=O)C3=C(O2)C(=C(C=C3OC)OC)Cl)OCCCC=C	UBIHPQYRNODHDT-GTJPDFRWSA-N	(2S,5'R)-7-chloro-4,6-dimethoxy-5'-methyl-3'-pent-4-enoxyspiro[1-benzofuran-2,4'-cyclohex-2-ene]-1',3-dione
25171430	(2S,5'R)-7-chloro-3'-(cyclopropylmethoxy)-4,6-dimethoxy-5'-methylspiro[1-benzofuran-2,4'-cyclohex-2-ene]-1',3-dione	392.8	C20H21ClO6	C[C@@H]1CC(=O)C=C([C@]12C(=O)C3=C(O2)C(=C(C=C3OC)OC)Cl)OCC4CC4	CKHBACZCTLPKRC-SBKAZYGRSA-N	(2S,5'R)-7-chloro-3'-(cyclopropylmethoxy)-4,6-dimethoxy-5'-methylspiro[1-benzofuran-2,4'-cyclohex-2-ene]-1',3-dione
25171632	(2S,5'R)-7-chloro-3'-cyclopentyloxy-4,6-dimethoxy-5'-methylspiro[1-benzofuran-2,4'-cyclohex-2-ene]-1',3-dione	406.9	C21H23ClO6	C[C@@H]1CC(=O)C=C([C@]12C(=O)C3=C(O2)C(=C(C=C3OC)OC)Cl)OC4CCCC4	UANRQUVMROWFKR-FIKIJFGZSA-N	(2S,5'R)-7-chloro-3'-cyclopentyloxy-4,6-dimethoxy-5'-methylspiro[1-benzofuran-2,4'-cyclohex-2-ene]-1',3-dione
25171633	(2S,5'R)-7-chloro-4,6-dimethoxy-5'-methyl-3'-phenylmethoxyspiro[1-benzofuran-2,4'-cyclohex-2-ene]-1',3-dione	428.9	C23H21ClO6	C[C@@H]1CC(=O)C=C([C@]12C(=O)C3=C(O2)C(=C(C=C3OC)OC)Cl)OCC4=CC=CC=C4	LAWAOYZSUFCPKY-ZLOXQWCVSA-N	(2S,5'R)-7-chloro-4,6-dimethoxy-5'-methyl-3'-phenylmethoxyspiro[1-benzofuran-2,4'-cyclohex-2-ene]-1',3-dione
25171634	(2S,5'R)-7-chloro-4-ethoxy-3',6-dimethoxy-5'-methylspiro[1-benzofuran-2,4'-cyclohex-2-ene]-1',3-dione	366.8	C18H19ClO6	CCOC1=CC(=C(C2=C1C(=O)[C@]3(O2)[C@@H](CC(=O)C=C3OC)C)Cl)OC	UYKRALKUUGWPGG-LZVRBXCZSA-N	(2S,5'R)-7-chloro-4-ethoxy-3',6-dimethoxy-5'-methylspiro[1-benzofuran-2,4'-cyclohex-2-ene]-1',3-dione
25171635	(2S,5'R)-7-chloro-3',6-dimethoxy-5'-methyl-4-phenylmethoxyspiro[1-benzofuran-2,4'-cyclohex-2-ene]-1',3-dione	428.9	C23H21ClO6	C[C@@H]1CC(=O)C=C([C@]12C(=O)C3=C(O2)C(=C(C=C3OCC4=CC=CC=C4)OC)Cl)OC	IXLMMSVGPRNBCX-ZLOXQWCVSA-N	(2S,5'R)-7-chloro-3',6-dimethoxy-5'-methyl-4-phenylmethoxyspiro[1-benzofuran-2,4'-cyclohex-2-ene]-1',3-dione
25171636	(2S,5'R)-7-chloro-3',4,6-trimethoxy-2',5'-dimethylspiro[1-benzofuran-2,4'-cyclohex-2-ene]-1',3-dione	366.8	C18H19ClO6	C[C@@H]1CC(=O)C(=C([C@]12C(=O)C3=C(O2)C(=C(C=C3OC)OC)Cl)OC)C	HMYYTHJMWUICRM-NTCNTBNZSA-N	(2S,5'R)-7-chloro-3',4,6-trimethoxy-2',5'-dimethylspiro[1-benzofuran-2,4'-cyclohex-2-ene]-1',3-dione
25171637	(2S,3'R,5'S)-7-chloro-4,6-dimethoxy-3'-methyl-5'-phenylmethoxyspiro[1-benzofuran-2,4'-cyclohexane]-1',3-dione	430.9	C23H23ClO6	C[C@@H]1CC(=O)C[C@@H]([C@]12C(=O)C3=C(O2)C(=C(C=C3OC)OC)Cl)OCC4=CC=CC=C4	VYRBGZRARROZHV-UTAGQHFDSA-N	(2S,3'R,5'S)-7-chloro-4,6-dimethoxy-3'-methyl-5'-phenylmethoxyspiro[1-benzofuran-2,4'-cyclohexane]-1',3-dione
25171846	(2S,3'E,5'R)-7-chloro-3'-hydroxyimino-1',4,6-trimethoxy-5'-methylspiro[1-benzofuran-2,6'-cyclohexene]-3-one	367.8	C17H18ClNO6	C[C@@H]1C/C(=N\\O)/C=C([C@]12C(=O)C3=C(O2)C(=C(C=C3OC)OC)Cl)OC	OVQUIBVMVDMJJI-VKRVZJRYSA-N	(2S,3'E,5'R)-7-chloro-3'-hydroxyimino-1',4,6-trimethoxy-5'-methylspiro[1-benzofuran-2,6'-cyclohexene]-3-one
25171847	(2S,5'R)-7-chloro-4,6-dimethoxy-5'-methyl-3'-propan-2-yloxyspiro[1-benzofuran-2,4'-cyclohex-2-ene]-1',3-dione	380.8	C19H21ClO6	C[C@@H]1CC(=O)C=C([C@]12C(=O)C3=C(O2)C(=C(C=C3OC)OC)Cl)OC(C)C	YDYBTZLQOZLSGM-DGIBIBHMSA-N	(2S,5'R)-7-chloro-4,6-dimethoxy-5'-methyl-3'-propan-2-yloxyspiro[1-benzofuran-2,4'-cyclohex-2-ene]-1',3-dione
25171849	(2S,5'R)-7-chloro-4,6-dimethoxy-5'-methyl-3'-(naphthalen-1-ylmethoxy)spiro[1-benzofuran-2,4'-cyclohex-2-ene]-1',3-dione	478.9	C27H23ClO6	C[C@@H]1CC(=O)C=C([C@]12C(=O)C3=C(O2)C(=C(C=C3OC)OC)Cl)OCC4=CC=CC5=CC=CC=C54	YPFXDKRKCZYIIC-RXAIFQJESA-N	(2S,5'R)-7-chloro-4,6-dimethoxy-5'-methyl-3'-(naphthalen-1-ylmethoxy)spiro[1-benzofuran-2,4'-cyclohex-2-ene]-1',3-dione
25172057	(2R,5'R)-3'-benzylsulfanyl-7-chloro-4,6-dimethoxy-5'-methylspiro[1-benzofuran-2,4'-cyclohex-2-ene]-1',3-dione	444.9	C23H21ClO5S	C[C@@H]1CC(=O)C=C([C@]12C(=O)C3=C(O2)C(=C(C=C3OC)OC)Cl)SCC4=CC=CC=C4	KOWBFBWFLFWGIE-ZLOXQWCVSA-N	(2R,5'R)-3'-benzylsulfanyl-7-chloro-4,6-dimethoxy-5'-methylspiro[1-benzofuran-2,4'-cyclohex-2-ene]-1',3-dione
40455568	(2R)-7-chloro-3',4,6-trimethoxy-5'-methylspiro[1-benzofuran-2,4'-cyclohexa-2,5-diene]-1',3-dione	350.7	C17H15ClO6	CC1=CC(=O)C=C([C@@]12C(=O)C3=C(O2)C(=C(C=C3OC)OC)Cl)OC	ISLYVROQSJYFAZ-QGZVFWFLSA-N	(2R)-7-chloro-3',4,6-trimethoxy-5'-methylspiro[1-benzofuran-2,4'-cyclohexa-2,5-diene]-1',3-dione
44139468	(2S,5'R)-7-chloro-4,6-dimethoxy-5'-methyl-3'-[(4-methylphenyl)methoxy]spiro[1-benzofuran-2,4'-cyclohex-2-ene]-1',3-dione	442.9	C24H23ClO6	C[C@@H]1CC(=O)C=C([C@]12C(=O)C3=C(O2)C(=C(C=C3OC)OC)Cl)OCC4=CC=C(C=C4)C	RCARUSSJOULNHH-SHACYNPGSA-N	(2S,5'R)-7-chloro-4,6-dimethoxy-5'-methyl-3'-[(4-methylphenyl)methoxy]spiro[1-benzofuran-2,4'-cyclohex-2-ene]-1',3-dione
44139586	(2S,5'R)-3'-(1-adamantylmethoxy)-7-chloro-4,6-dimethoxy-5'-methylspiro[1-benzofuran-2,4'-cyclohex-2-ene]-1',3-dione	487	C27H31ClO6	C[C@@H]1CC(=O)C=C([C@]12C(=O)C3=C(O2)C(=C(C=C3OC)OC)Cl)OCC45CC6CC(C4)CC(C6)C5	FFCLQFXYURCGSS-NVFUEESLSA-N	(2S,5'R)-3'-(1-adamantylmethoxy)-7-chloro-4,6-dimethoxy-5'-methylspiro[1-benzofuran-2,4'-cyclohex-2-ene]-1',3-dione
44139587	(2S,5'R)-7-chloro-3'-(cyclopropylmethoxy)-4,6-dimethoxy-5'-methylspiro[1-benzofuran-2,6'-cyclohex-2-ene]-1',3-dione	392.8	C20H21ClO6	C[C@@H]1CC(=CC(=O)[C@]12C(=O)C3=C(O2)C(=C(C=C3OC)OC)Cl)OCC4CC4	FJCBUABDYILSBA-SBKAZYGRSA-N	(2S,5'R)-7-chloro-3'-(cyclopropylmethoxy)-4,6-dimethoxy-5'-methylspiro[1-benzofuran-2,6'-cyclohex-2-ene]-1',3-dione
44139588	(2S,5'R)-7-chloro-4,6-dimethoxy-5'-methyl-3'-(2-phenylethoxy)spiro[1-benzofuran-2,4'-cyclohex-2-ene]-1',3-dione	442.9	C24H23ClO6	C[C@@H]1CC(=O)C=C([C@]12C(=O)C3=C(O2)C(=C(C=C3OC)OC)Cl)OCCC4=CC=CC=C4	RNHQTYFNOYNEHU-SHACYNPGSA-N	(2S,5'R)-7-chloro-4,6-dimethoxy-5'-methyl-3'-(2-phenylethoxy)spiro[1-benzofuran-2,4'-cyclohex-2-ene]-1',3-dione
44139589	(2S,5'R)-7-chloro-4,6-dimethoxy-5'-methyl-3'-[(4-phenylphenyl)methoxy]spiro[1-benzofuran-2,4'-cyclohex-2-ene]-1',3-dione	505	C29H25ClO6	C[C@@H]1CC(=O)C=C([C@]12C(=O)C3=C(O2)C(=C(C=C3OC)OC)Cl)OCC4=CC=C(C=C4)C5=CC=CC=C5	MFPJCDKJLCZACG-JWRCQZCYSA-N	(2S,5'R)-7-chloro-4,6-dimethoxy-5'-methyl-3'-[(4-phenylphenyl)methoxy]spiro[1-benzofuran-2,4'-cyclohex-2-ene]-1',3-dione
44139590	(2S,5'R)-7-chloro-3'-cyclopentyloxy-4,6-dimethoxy-5'-methylspiro[1-benzofuran-2,6'-cyclohex-2-ene]-1',3-dione	406.9	C21H23ClO6	C[C@@H]1CC(=CC(=O)[C@]12C(=O)C3=C(O2)C(=C(C=C3OC)OC)Cl)OC4CCCC4	IBMQOJDGKKQEKI-FIKIJFGZSA-N	(2S,5'R)-7-chloro-3'-cyclopentyloxy-4,6-dimethoxy-5'-methylspiro[1-benzofuran-2,6'-cyclohex-2-ene]-1',3-dione
44148513	Griseofulvin 4'-oxime	367.8	C17H18ClNO6	CC1C/C(=N\\O)/C=C(C12C(=O)C3=C(O2)C(=C(C=C3OC)OC)Cl)OC	OVQUIBVMVDMJJI-DJKKODMXSA-N	(3'E)-7-chloro-3'-hydroxyimino-1',4,6-trimethoxy-5'-methylspiro[1-benzofuran-2,6'-cyclohexene]-3-one
44565921	4-O-Demethyl Griseofulvin	338.74	C16H15ClO6	C[C@@H]1CC(=O)C=C([C@]12C(=O)C3=C(O2)C(=C(C=C3O)OC)Cl)OC	KTICLSBYPHKDMM-QZTNRIJFSA-N	(2S,5'R)-7-chloro-4-hydroxy-3',6-dimethoxy-5'-methylspiro[1-benzofuran-2,4'-cyclohex-2-ene]-1',3-dione
44565973	(2S,5'R)-7-chloro-3'-ethoxy-4,6-dimethoxy-5'-methylspiro[1-benzofuran-2,4'-cyclohex-2-ene]-1',3-dione	366.8	C18H19ClO6	CCOC1=CC(=O)C[C@H]([C@@]12C(=O)C3=C(O2)C(=C(C=C3OC)OC)Cl)C	VHXBNOUUDLLFER-LZVRBXCZSA-N	(2S,5'R)-7-chloro-3'-ethoxy-4,6-dimethoxy-5'-methylspiro[1-benzofuran-2,4'-cyclohex-2-ene]-1',3-dione
44565974	(2S,6'R)-7-Chloro-2'-propoxy-4,6-dimethoxy-6'-methylspiro[benzofuran-2(3H),1'-[2]cyclohexene]-3,4'-dione	380.8	C19H21ClO6	CCCOC1=CC(=O)C[C@H]([C@@]12C(=O)C3=C(O2)C(=C(C=C3OC)OC)Cl)C	CFOHRWBARJOUIP-DGIBIBHMSA-N	(2S,5'R)-7-chloro-4,6-dimethoxy-5'-methyl-3'-propoxyspiro[1-benzofuran-2,4'-cyclohex-2-ene]-1',3-dione
44566031	(2S,5'R)-7-chloro-4,6-dimethoxy-5'-methyl-3'-phenoxyspiro[1-benzofuran-2,4'-cyclohex-2-ene]-1',3-dione	414.8	C22H19ClO6	C[C@@H]1CC(=O)C=C([C@]12C(=O)C3=C(O2)C(=C(C=C3OC)OC)Cl)OC4=CC=CC=C4	MLXKTDAOIYKXDM-IPQOISQHSA-N	(2S,5'R)-7-chloro-4,6-dimethoxy-5'-methyl-3'-phenoxyspiro[1-benzofuran-2,4'-cyclohex-2-ene]-1',3-dione
44566051	(2S,3'S,5'R)-7-chloro-3',6-dihydroxy-1',4-dimethoxy-5'-methylspiro[1-benzofuran-2,6'-cyclohexene]-3-one	340.75	C16H17ClO6	C[C@@H]1C[C@@H](C=C([C@]12C(=O)C3=C(C=C(C(=C3O2)Cl)O)OC)OC)O	JDWOVZABPZINND-BJLCURGVSA-N	(2S,3'S,5'R)-7-chloro-3',6-dihydroxy-1',4-dimethoxy-5'-methylspiro[1-benzofuran-2,6'-cyclohexene]-3-one
44566064	(2S,2'S,4'S,6'R)-7-chloro-4'-hydroxy-2',4,6-trimethoxy-6'-methylspiro[1-benzofuran-2,1'-cyclohexane]-3-one	356.8	C17H21ClO6	C[C@@H]1C[C@@H](C[C@@H]([C@]12C(=O)C3=C(O2)C(=C(C=C3OC)OC)Cl)OC)O	ZUAVWHYWKWBECT-KJKHMHQUSA-N	(2S,2'S,4'S,6'R)-7-chloro-4'-hydroxy-2',4,6-trimethoxy-6'-methylspiro[1-benzofuran-2,1'-cyclohexane]-3-one
44566065	(2S,3'Z,5'R)-7-chloro-3'-hydroxyimino-1',4,6-trimethoxy-5'-methylspiro[1-benzofuran-2,6'-cyclohexene]-3-one	367.8	C17H18ClNO6	C[C@@H]1C/C(=N/O)/C=C([C@]12C(=O)C3=C(O2)C(=C(C=C3OC)OC)Cl)OC	OVQUIBVMVDMJJI-MVDOQPSKSA-N	(2S,3'Z,5'R)-7-chloro-3'-hydroxyimino-1',4,6-trimethoxy-5'-methylspiro[1-benzofuran-2,6'-cyclohexene]-3-one
44566068	(2R,5'R)-7-chloro-4,6-dimethoxy-2',2',5'-trimethylspiro[1-benzofuran-2,4'-cyclohexane]-1',3,3'-trione	366.8	C18H19ClO6	C[C@@H]1CC(=O)C(C(=O)[C@]12C(=O)C3=C(O2)C(=C(C=C3OC)OC)Cl)(C)C	PWLHVTJCMHHDOD-NTCNTBNZSA-N	(2R,5'R)-7-chloro-4,6-dimethoxy-2',2',5'-trimethylspiro[1-benzofuran-2,4'-cyclohexane]-1',3,3'-trione
44566075	(2S,5'R)-2'-benzyl-7-chloro-3'-hydroxy-4,6-dimethoxy-5'-methylspiro[1-benzofuran-2,4'-cyclohex-2-ene]-1',3-dione	428.9	C23H21ClO6	C[C@@H]1CC(=O)C(=C([C@]12C(=O)C3=C(O2)C(=C(C=C3OC)OC)Cl)O)CC4=CC=CC=C4	BCLALKQLZFVDPT-SPSFWMDKSA-N	(2S,5'R)-2'-benzyl-7-chloro-3'-hydroxy-4,6-dimethoxy-5'-methylspiro[1-benzofuran-2,4'-cyclohex-2-ene]-1',3-dione
44566076	(2S,5'R)-7-chloro-2'-iodo-3',4,6-trimethoxy-5'-methylspiro[1-benzofuran-2,4'-cyclohex-2-ene]-1',3-dione	478.7	C17H16ClIO6	C[C@@H]1CC(=O)C(=C([C@]12C(=O)C3=C(O2)C(=C(C=C3OC)OC)Cl)OC)I	QRASOQFJKRHZSW-IWEMQMMOSA-N	(2S,5'R)-7-chloro-2'-iodo-3',4,6-trimethoxy-5'-methylspiro[1-benzofuran-2,4'-cyclohex-2-ene]-1',3-dione
44566077	(2S,5'R)-7-chloro-2'-iodo-4,6-dimethoxy-5'-methyl-3'-propoxyspiro[1-benzofuran-2,4'-cyclohex-2-ene]-1',3-dione	506.7	C19H20ClIO6	CCCOC1=C(C(=O)C[C@H]([C@@]12C(=O)C3=C(O2)C(=C(C=C3OC)OC)Cl)C)I	DCWULYIYJLKLQU-AYLIAGHASA-N	(2S,5'R)-7-chloro-2'-iodo-4,6-dimethoxy-5'-methyl-3'-propoxyspiro[1-benzofuran-2,4'-cyclohex-2-ene]-1',3-dione
44566078	(2S,5'R)-7-chloro-2'-iodo-4,6-dimethoxy-5'-methyl-3'-phenylmethoxyspiro[1-benzofuran-2,4'-cyclohex-2-ene]-1',3-dione	554.8	C23H20ClIO6	C[C@@H]1CC(=O)C(=C([C@]12C(=O)C3=C(O2)C(=C(C=C3OC)OC)Cl)OCC4=CC=CC=C4)I	GMCOGARSJURMJB-SFDCACGMSA-N	(2S,5'R)-7-chloro-2'-iodo-4,6-dimethoxy-5'-methyl-3'-phenylmethoxyspiro[1-benzofuran-2,4'-cyclohex-2-ene]-1',3-dione
46843899	(2S,5'R)-7-chloro-3'-[(4-chlorophenyl)methoxy]-4,6-dimethoxy-5'-methylspiro[1-benzofuran-2,4'-cyclohex-2-ene]-1',3-dione	463.3	C23H20Cl2O6	C[C@@H]1CC(=O)C=C([C@]12C(=O)C3=C(O2)C(=C(C=C3OC)OC)Cl)OCC4=CC=C(C=C4)Cl	IFDFNRPWVVIJMN-SPSFWMDKSA-N	(2S,5'R)-7-chloro-3'-[(4-chlorophenyl)methoxy]-4,6-dimethoxy-5'-methylspiro[1-benzofuran-2,4'-cyclohex-2-ene]-1',3-dione
46843961	(2S,5'R)-7-chloro-3'-[(4-iodophenyl)methoxy]-4,6-dimethoxy-5'-methylspiro[1-benzofuran-2,4'-cyclohex-2-ene]-1',3-dione	554.8	C23H20ClIO6	C[C@@H]1CC(=O)C=C([C@]12C(=O)C3=C(O2)C(=C(C=C3OC)OC)Cl)OCC4=CC=C(C=C4)I	FHUFURVGAREWMX-SPSFWMDKSA-N	(2S,5'R)-7-chloro-3'-[(4-iodophenyl)methoxy]-4,6-dimethoxy-5'-methylspiro[1-benzofuran-2,4'-cyclohex-2-ene]-1',3-dione
46843962	(2S,5'R)-7-chloro-3'-[(3-iodophenyl)methoxy]-4,6-dimethoxy-5'-methylspiro[1-benzofuran-2,4'-cyclohex-2-ene]-1',3-dione	554.8	C23H20ClIO6	C[C@@H]1CC(=O)C=C([C@]12C(=O)C3=C(O2)C(=C(C=C3OC)OC)Cl)OCC4=CC(=CC=C4)I	BSTCRAQRULCJRT-SPSFWMDKSA-N	(2S,5'R)-7-chloro-3'-[(3-iodophenyl)methoxy]-4,6-dimethoxy-5'-methylspiro[1-benzofuran-2,4'-cyclohex-2-ene]-1',3-dione
46843963	(2S,5'R)-7-chloro-3'-[(2-iodophenyl)methoxy]-4,6-dimethoxy-5'-methylspiro[1-benzofuran-2,4'-cyclohex-2-ene]-1',3-dione	554.8	C23H20ClIO6	C[C@@H]1CC(=O)C=C([C@]12C(=O)C3=C(O2)C(=C(C=C3OC)OC)Cl)OCC4=CC=CC=C4I	UVDPVANUXBQYTA-SPSFWMDKSA-N	(2S,5'R)-7-chloro-3'-[(2-iodophenyl)methoxy]-4,6-dimethoxy-5'-methylspiro[1-benzofuran-2,4'-cyclohex-2-ene]-1',3-dione
46843964	(2S,5'R)-7-chloro-3'-[[4-(hydroxymethyl)phenyl]methoxy]-4,6-dimethoxy-5'-methylspiro[1-benzofuran-2,4'-cyclohex-2-ene]-1',3-dione	458.9	C24H23ClO7	C[C@@H]1CC(=O)C=C([C@]12C(=O)C3=C(O2)C(=C(C=C3OC)OC)Cl)OCC4=CC=C(C=C4)CO	SMBQHXSDCMUAIA-OZAJXLCCSA-N	(2S,5'R)-7-chloro-3'-[[4-(hydroxymethyl)phenyl]methoxy]-4,6-dimethoxy-5'-methylspiro[1-benzofuran-2,4'-cyclohex-2-ene]-1',3-dione
46843965	(2S,5'R)-3'-[[4-(bromomethyl)phenyl]methoxy]-7-chloro-4,6-dimethoxy-5'-methylspiro[1-benzofuran-2,4'-cyclohex-2-ene]-1',3-dione	521.799	C24H22BrClO6	C[C@@H]1CC(=O)C=C([C@]12C(=O)C3=C(O2)C(=C(C=C3OC)OC)Cl)OCC4=CC=C(C=C4)CBr	ZBBDWFLCPKFZLH-OZAJXLCCSA-N	(2S,5'R)-3'-[[4-(bromomethyl)phenyl]methoxy]-7-chloro-4,6-dimethoxy-5'-methylspiro[1-benzofuran-2,4'-cyclohex-2-ene]-1',3-dione
46844022	(2S,5'R)-7-chloro-3'-[(2-chlorophenyl)methoxy]-4,6-dimethoxy-5'-methylspiro[1-benzofuran-2,4'-cyclohex-2-ene]-1',3-dione	463.3	C23H20Cl2O6	C[C@@H]1CC(=O)C=C([C@]12C(=O)C3=C(O2)C(=C(C=C3OC)OC)Cl)OCC4=CC=CC=C4Cl	DBUZGDCVMBJCSC-SPSFWMDKSA-N	(2S,5'R)-7-chloro-3'-[(2-chlorophenyl)methoxy]-4,6-dimethoxy-5'-methylspiro[1-benzofuran-2,4'-cyclohex-2-ene]-1',3-dione
46844023	(2S,5'R)-3'-[(3-bromophenyl)methoxy]-7-chloro-4,6-dimethoxy-5'-methylspiro[1-benzofuran-2,4'-cyclohex-2-ene]-1',3-dione	507.8	C23H20BrClO6	C[C@@H]1CC(=O)C=C([C@]12C(=O)C3=C(O2)C(=C(C=C3OC)OC)Cl)OCC4=CC(=CC=C4)Br	UEAVERZUPZGGDF-SPSFWMDKSA-N	(2S,5'R)-3'-[(3-bromophenyl)methoxy]-7-chloro-4,6-dimethoxy-5'-methylspiro[1-benzofuran-2,4'-cyclohex-2-ene]-1',3-dione
46844024	(2S,5'R)-7-chloro-3'-[(4-fluorophenyl)methoxy]-4,6-dimethoxy-5'-methylspiro[1-benzofuran-2,4'-cyclohex-2-ene]-1',3-dione	446.8	C23H20ClFO6	C[C@@H]1CC(=O)C=C([C@]12C(=O)C3=C(O2)C(=C(C=C3OC)OC)Cl)OCC4=CC=C(C=C4)F	NTAZCCWXWQYSGM-SPSFWMDKSA-N	(2S,5'R)-7-chloro-3'-[(4-fluorophenyl)methoxy]-4,6-dimethoxy-5'-methylspiro[1-benzofuran-2,4'-cyclohex-2-ene]-1',3-dione
46844079	4-[[(2S,5'R)-7-chloro-4,6-dimethoxy-5'-methyl-3,3'-dioxospiro[1-benzofuran-2,6'-cyclohexene]-1'-yl]oxymethyl]benzonitrile	453.9	C24H20ClNO6	C[C@@H]1CC(=O)C=C([C@]12C(=O)C3=C(O2)C(=C(C=C3OC)OC)Cl)OCC4=CC=C(C=C4)C#N	FNIMBFDGLCXEIZ-OZAJXLCCSA-N	4-[[(2S,5'R)-7-chloro-4,6-dimethoxy-5'-methyl-3,3'-dioxospiro[1-benzofuran-2,6'-cyclohexene]-1'-yl]oxymethyl]benzonitrile
46844082	(2S,5'R)-3'-[[3,5-bis(phenylmethoxy)phenyl]methoxy]-7-chloro-4,6-dimethoxy-5'-methylspiro[1-benzofuran-2,4'-cyclohex-2-ene]-1',3-dione	641.1	C37H33ClO8	C[C@@H]1CC(=O)C=C([C@]12C(=O)C3=C(O2)C(=C(C=C3OC)OC)Cl)OCC4=CC(=CC(=C4)OCC5=CC=CC=C5)OCC6=CC=CC=C6	LRZGUZWNVLCIMP-FPHJQGEJSA-N	(2S,5'R)-3'-[[3,5-bis(phenylmethoxy)phenyl]methoxy]-7-chloro-4,6-dimethoxy-5'-methylspiro[1-benzofuran-2,4'-cyclohex-2-ene]-1',3-dione
46844083	(2S,5'R)-3'-[(4-butoxyphenyl)methoxy]-7-chloro-4,6-dimethoxy-5'-methylspiro[1-benzofuran-2,4'-cyclohex-2-ene]-1',3-dione	501	C27H29ClO7	CCCCOC1=CC=C(C=C1)COC2=CC(=O)C[C@H]([C@@]23C(=O)C4=C(O3)C(=C(C=C4OC)OC)Cl)C	LJOJCLKSNAUYOE-JWIGPWBQSA-N	(2S,5'R)-3'-[(4-butoxyphenyl)methoxy]-7-chloro-4,6-dimethoxy-5'-methylspiro[1-benzofuran-2,4'-cyclohex-2-ene]-1',3-dione
46844137	(2S,5'R)-7-chloro-4,6-dimethoxy-5'-methyl-3'-[[4-(trifluoromethyl)phenyl]methoxy]spiro[1-benzofuran-2,4'-cyclohex-2-ene]-1',3-dione	496.9	C24H20ClF3O6	C[C@@H]1CC(=O)C=C([C@]12C(=O)C3=C(O2)C(=C(C=C3OC)OC)Cl)OCC4=CC=C(C=C4)C(F)(F)F	YUAHXBKVHLJFDM-SPSFWMDKSA-N	(2S,5'R)-7-chloro-4,6-dimethoxy-5'-methyl-3'-[[4-(trifluoromethyl)phenyl]methoxy]spiro[1-benzofuran-2,4'-cyclohex-2-ene]-1',3-dione
46844138	(2S,5'R)-7-chloro-3'-decoxy-2'-iodo-4,6-dimethoxy-5'-methylspiro[1-benzofuran-2,4'-cyclohex-2-ene]-1',3-dione	604.9	C26H34ClIO6	CCCCCCCCCCOC1=C(C(=O)C[C@H]([C@@]12C(=O)C3=C(O2)C(=C(C=C3OC)OC)Cl)C)I	BMFIBFANOUIFRU-AKJBCIBTSA-N	(2S,5'R)-7-chloro-3'-decoxy-2'-iodo-4,6-dimethoxy-5'-methylspiro[1-benzofuran-2,4'-cyclohex-2-ene]-1',3-dione
51401507	(2S,3'R,5'R)-7-chloro-3',4,6-trimethoxy-5'-methylspiro[1-benzofuran-2,4'-cyclohexane]-1',3-dione	354.8	C17H19ClO6	C[C@@H]1CC(=O)C[C@H]([C@]12C(=O)C3=C(O2)C(=C(C=C3OC)OC)Cl)OC	IIUZTXTZRGLYTI-GHRXZXLISA-N	(2S,3'R,5'R)-7-chloro-3',4,6-trimethoxy-5'-methylspiro[1-benzofuran-2,4'-cyclohexane]-1',3-dione
56691266	7-Chloro-2',4,6-trimethoxy-6'-methylspiro[1-benzofuran-2,4'-cyclohex-2-ene]-1',3-dione	352.8	C17H17ClO6	CC1CC2(C=C(C1=O)OC)C(=O)C3=C(O2)C(=C(C=C3OC)OC)Cl	SPLQSELLVJQFGL-UHFFFAOYSA-N	7-chloro-2',4,6-trimethoxy-6'-methylspiro[1-benzofuran-2,4'-cyclohex-2-ene]-1',3-dione
56924745	(2S,5'R)-3',7-dichloro-4,6-dimethoxy-5'-methylspiro[1-benzofuran-2,6'-cyclohex-2-ene]-1',3-dione	357.2	C16H14Cl2O5	C[C@@H]1CC(=CC(=O)[C@]12C(=O)C3=C(O2)C(=C(C=C3OC)OC)Cl)Cl	DWFAJTZKBVTMQY-QZTNRIJFSA-N	(2S,5'R)-3',7-dichloro-4,6-dimethoxy-5'-methylspiro[1-benzofuran-2,6'-cyclohex-2-ene]-1',3-dione
56924746	(2R,5'R)-3',7-dichloro-4,6-dimethoxy-5'-methylspiro[1-benzofuran-2,4'-cyclohex-2-ene]-1',3-dione	357.2	C16H14Cl2O5	C[C@@H]1CC(=O)C=C([C@]12C(=O)C3=C(O2)C(=C(C=C3OC)OC)Cl)Cl	ZARJFOZMHNKHAD-QZTNRIJFSA-N	(2R,5'R)-3',7-dichloro-4,6-dimethoxy-5'-methylspiro[1-benzofuran-2,4'-cyclohex-2-ene]-1',3-dione
56924747	(2S,5'R)-7-chloro-3',6-dimethoxy-5'-methyl-4-(naphthalen-1-ylmethoxy)spiro[1-benzofuran-2,4'-cyclohex-2-ene]-1',3-dione	478.9	C27H23ClO6	C[C@@H]1CC(=O)C=C([C@]12C(=O)C3=C(O2)C(=C(C=C3OCC4=CC=CC5=CC=CC=C54)OC)Cl)OC	UKPDAYCCUAALGA-RXAIFQJESA-N	(2S,5'R)-7-chloro-3',6-dimethoxy-5'-methyl-4-(naphthalen-1-ylmethoxy)spiro[1-benzofuran-2,4'-cyclohex-2-ene]-1',3-dione
56950704	(2S,5'R)-7-chloro-3',6-dimethoxy-5'-methyl-4-pentoxyspiro[1-benzofuran-2,4'-cyclohex-2-ene]-1',3-dione	408.9	C21H25ClO6	CCCCCOC1=CC(=C(C2=C1C(=O)[C@]3(O2)[C@@H](CC(=O)C=C3OC)C)Cl)OC	RGZRTWLAKRPYAD-GTJPDFRWSA-N	(2S,5'R)-7-chloro-3',6-dimethoxy-5'-methyl-4-pentoxyspiro[1-benzofuran-2,4'-cyclohex-2-ene]-1',3-dione
56950842	(2S,5'R)-7-chloro-4,6-dimethoxy-3'-[(2-methoxyphenyl)methoxy]-5'-methylspiro[1-benzofuran-2,4'-cyclohex-2-ene]-1',3-dione	458.9	C24H23ClO7	C[C@@H]1CC(=O)C=C([C@]12C(=O)C3=C(O2)C(=C(C=C3OC)OC)Cl)OCC4=CC=CC=C4OC	WIMIYJNGPVKWSF-OZAJXLCCSA-N	(2S,5'R)-7-chloro-4,6-dimethoxy-3'-[(2-methoxyphenyl)methoxy]-5'-methylspiro[1-benzofuran-2,4'-cyclohex-2-ene]-1',3-dione
56950843	(2S,5'R)-7-chloro-4,6-dimethoxy-3'-[(3-methoxyphenyl)methoxy]-5'-methylspiro[1-benzofuran-2,4'-cyclohex-2-ene]-1',3-dione	458.9	C24H23ClO7	C[C@@H]1CC(=O)C=C([C@]12C(=O)C3=C(O2)C(=C(C=C3OC)OC)Cl)OCC4=CC(=CC=C4)OC	JSYQVISFBXCAAF-OZAJXLCCSA-N	(2S,5'R)-7-chloro-4,6-dimethoxy-3'-[(3-methoxyphenyl)methoxy]-5'-methylspiro[1-benzofuran-2,4'-cyclohex-2-ene]-1',3-dione
56950844	(2S,5'R)-7-chloro-4,6-dimethoxy-3'-[(4-methoxyphenyl)methoxy]-5'-methylspiro[1-benzofuran-2,4'-cyclohex-2-ene]-1',3-dione	458.9	C24H23ClO7	C[C@@H]1CC(=O)C=C([C@]12C(=O)C3=C(O2)C(=C(C=C3OC)OC)Cl)OCC4=CC=C(C=C4)OC	ZNPBRFZWAJXMQQ-OZAJXLCCSA-N	(2S,5'R)-7-chloro-4,6-dimethoxy-3'-[(4-methoxyphenyl)methoxy]-5'-methylspiro[1-benzofuran-2,4'-cyclohex-2-ene]-1',3-dione
56950845	(2S,5'R)-7-chloro-4,6-dimethoxy-3'-[(3-methoxyphenyl)methoxy]-5'-methylspiro[1-benzofuran-2,6'-cyclohex-2-ene]-1',3-dione	458.9	C24H23ClO7	C[C@@H]1CC(=CC(=O)[C@]12C(=O)C3=C(O2)C(=C(C=C3OC)OC)Cl)OCC4=CC(=CC=C4)OC	MRVZTYDFXPQGHH-OZAJXLCCSA-N	(2S,5'R)-7-chloro-4,6-dimethoxy-3'-[(3-methoxyphenyl)methoxy]-5'-methylspiro[1-benzofuran-2,6'-cyclohex-2-ene]-1',3-dione
56950846	(2S,5'R)-7-chloro-4,6-dimethoxy-5'-methyl-3'-phenylmethoxyspiro[1-benzofuran-2,6'-cyclohex-2-ene]-1',3-dione	428.9	C23H21ClO6	C[C@@H]1CC(=CC(=O)[C@]12C(=O)C3=C(O2)C(=C(C=C3OC)OC)Cl)OCC4=CC=CC=C4	SPYONLUZMGZZAO-ZLOXQWCVSA-N	(2S,5'R)-7-chloro-4,6-dimethoxy-5'-methyl-3'-phenylmethoxyspiro[1-benzofuran-2,6'-cyclohex-2-ene]-1',3-dione
57390407	(2S,5'R)-7-chloro-3'-ethoxy-4,6-dimethoxy-5'-methylspiro[1-benzofuran-2,6'-cyclohex-2-ene]-1',3-dione	366.8	C18H19ClO6	CCOC1=CC(=O)[C@@]2([C@@H](C1)C)C(=O)C3=C(O2)C(=C(C=C3OC)OC)Cl	NIPIUEYPZWURFS-LZVRBXCZSA-N	(2S,5'R)-7-chloro-3'-ethoxy-4,6-dimethoxy-5'-methylspiro[1-benzofuran-2,6'-cyclohex-2-ene]-1',3-dione
57392201	(2S,5'R)-7-chloro-6-ethoxy-3',4-dimethoxy-5'-methylspiro[1-benzofuran-2,4'-cyclohex-2-ene]-1',3-dione	366.8	C18H19ClO6	CCOC1=C(C2=C(C(=C1)OC)C(=O)[C@]3(O2)[C@@H](CC(=O)C=C3OC)C)Cl	HEZSKWAZIDDYQL-LZVRBXCZSA-N	(2S,5'R)-7-chloro-6-ethoxy-3',4-dimethoxy-5'-methylspiro[1-benzofuran-2,4'-cyclohex-2-ene]-1',3-dione
57393956	(2S,5'R)-7-chloro-4,6-dimethoxy-5'-methyl-3'-propan-2-yloxyspiro[1-benzofuran-2,6'-cyclohex-2-ene]-1',3-dione	380.8	C19H21ClO6	C[C@@H]1CC(=CC(=O)[C@]12C(=O)C3=C(O2)C(=C(C=C3OC)OC)Cl)OC(C)C	CYZJSZVUIKQTBH-DGIBIBHMSA-N	(2S,5'R)-7-chloro-4,6-dimethoxy-5'-methyl-3'-propan-2-yloxyspiro[1-benzofuran-2,6'-cyclohex-2-ene]-1',3-dione
57395698	(2S,5'R)-7-chloro-4,6-dimethoxy-5'-methyl-3'-propoxyspiro[1-benzofuran-2,6'-cyclohex-2-ene]-1',3-dione	380.8	C19H21ClO6	CCCOC1=CC(=O)[C@@]2([C@@H](C1)C)C(=O)C3=C(O2)C(=C(C=C3OC)OC)Cl	JBUAXQJLEVDLMQ-DGIBIBHMSA-N	(2S,5'R)-7-chloro-4,6-dimethoxy-5'-methyl-3'-propoxyspiro[1-benzofuran-2,6'-cyclohex-2-ene]-1',3-dione
57397525	Rel-Griseofulvic Acid	338.74	C16H15ClO6	C[C@H]1CC(=O)CC(=O)[C@@]12C(=O)C3=C(O2)C(=C(C=C3OC)OC)Cl	YIQRSAKVWZVLDN-HYORBCNSSA-N	(2R,5'S)-7-chloro-4,6-dimethoxy-5'-methylspiro[1-benzofuran-2,4'-cyclohexane]-1',3,3'-trione
57397526	(2S,5'R)-7-chloro-3',6-dihydroxy-4-methoxy-5'-methylspiro[1-benzofuran-2,4'-cyclohex-2-ene]-1',3-dione	324.71	C15H13ClO6	C[C@@H]1CC(=O)C=C([C@]12C(=O)C3=C(C=C(C(=C3O2)Cl)O)OC)O	ZRCMNGPJMAXKBY-BAHMLBHCSA-N	(2S,5'R)-7-chloro-3',6-dihydroxy-4-methoxy-5'-methylspiro[1-benzofuran-2,4'-cyclohex-2-ene]-1',3-dione
67096429	(2S,6'R)-7-Chloro-2',4,6-trimethoxy-6'-methyl-3H,4'H-spiro[1-benzofuran-2,1'-cyclohex-2-ene]-3,4'-dione	705.5	C34H34Cl2O12	C[C@@H]1CC(=O)C=C([C@]12C(=O)C3=C(O2)C(=C(C=C3OC)OC)Cl)OC.C[C@@H]1CC(=O)C=C([C@]12C(=O)C3=C(O2)C(=C(C=C3OC)OC)Cl)OC	KLMAILZPHSLTAQ-KPCUWVDVSA-N	(2S,5'R)-7-chloro-3',4,6-trimethoxy-5'-methylspiro[1-benzofuran-2,4'-cyclohex-2-ene]-1',3-dione
67363532	2-aminoacetic acid;(2S,5'R)-7-chloro-3',4,6-trimethoxy-5'-methylspiro[1-benzofuran-2,4'-cyclohex-2-ene]-1',3-dione	427.8	C19H22ClNO8	C[C@@H]1CC(=O)C=C([C@]12C(=O)C3=C(O2)C(=C(C=C3OC)OC)Cl)OC.C(C(=O)O)N	QYNROSRCLAJYQU-BVQPHPBYSA-N	2-aminoacetic acid;(2S,5'R)-7-chloro-3',4,6-trimethoxy-5'-methylspiro[1-benzofuran-2,4'-cyclohex-2-ene]-1',3-dione
67892219	(2S,5'R)-7-chloro-3',4,6-trimethoxy-5'-methylspiro[1-benzofuran-2,4'-cyclohex-2-ene]-1',3-dione;prop-2-en-1-amine	409.9	C20H24ClNO6	C[C@@H]1CC(=O)C=C([C@]12C(=O)C3=C(O2)C(=C(C=C3OC)OC)Cl)OC.C=CCN	OVYHJVUPYZVUPV-BVQPHPBYSA-N	(2S,5'R)-7-chloro-3',4,6-trimethoxy-5'-methylspiro[1-benzofuran-2,4'-cyclohex-2-ene]-1',3-dione;prop-2-en-1-amine
68024713	(2S)-7-chloro-3'-hexoxy-4-hydroxy-6-methoxyspiro[1-benzofuran-2,4'-cyclohex-2-ene]-1',3-dione	394.8	C20H23ClO6	CCCCCCOC1=CC(=O)CC[C@@]12C(=O)C3=C(O2)C(=C(C=C3O)OC)Cl	OKHYMLANEWNXMO-FQEVSTJZSA-N	(2S)-7-chloro-3'-hexoxy-4-hydroxy-6-methoxyspiro[1-benzofuran-2,4'-cyclohex-2-ene]-1',3-dione
68727568	(5'R)-7-chloro-3',4,6-trimethoxy-2',5'-dimethylspiro[1-benzofuran-2,4'-cyclohex-2-ene]-1',3-dione	366.8	C18H19ClO6	C[C@@H]1CC(=O)C(=C(C12C(=O)C3=C(O2)C(=C(C=C3OC)OC)Cl)OC)C	HMYYTHJMWUICRM-XENHGZCFSA-N	(5'R)-7-chloro-3',4,6-trimethoxy-2',5'-dimethylspiro[1-benzofuran-2,4'-cyclohex-2-ene]-1',3-dione
68727702	(2S,5'R)-7-chloro-4,6-dimethoxy-5'-methyl-3'-prop-2-enoxyspiro[1-benzofuran-2,4'-cyclohex-2-ene]-1',3-dione	378.8	C19H19ClO6	C[C@@H]1CC(=O)C=C([C@]12C(=O)C3=C(O2)C(=C(C=C3OC)OC)Cl)OCC=C	ZWCBKWLNOPFRCL-DGIBIBHMSA-N	(2S,5'R)-7-chloro-4,6-dimethoxy-5'-methyl-3'-prop-2-enoxyspiro[1-benzofuran-2,4'-cyclohex-2-ene]-1',3-dione
70039744	(2S,5'R)-7-chloro-3',4,6-trimethoxy-5'-methylspiro[1-benzofuran-2,4'-cyclohex-2-ene]-1',3-dione;1,4-dioxane	440.9	C21H25ClO8	C[C@@H]1CC(=O)C=C([C@]12C(=O)C3=C(O2)C(=C(C=C3OC)OC)Cl)OC.C1COCCO1	HWWWBHSXOOKCOT-BVQPHPBYSA-N	(2S,5'R)-7-chloro-3',4,6-trimethoxy-5'-methylspiro[1-benzofuran-2,4'-cyclohex-2-ene]-1',3-dione;1,4-dioxane
70355234	(2S,5'R)-7-chloro-3',4,6-trimethoxy-5'-methylspiro[1-benzofuran-2,4'-cyclohex-2-ene]-1',3-dione;sulfane	386.8	C17H19ClO6S	C[C@@H]1CC(=O)C=C([C@]12C(=O)C3=C(O2)C(=C(C=C3OC)OC)Cl)OC.S	RAZFXSNBSVMDSM-BVQPHPBYSA-N	(2S,5'R)-7-chloro-3',4,6-trimethoxy-5'-methylspiro[1-benzofuran-2,4'-cyclohex-2-ene]-1',3-dione;sulfane
70658189	7-Chloro-6-(hydroxymethyl)-3',4-dimethoxy-5'-methylspiro[1-benzofuran-2,4'-cyclohex-2-ene]-1',3-dione	352.8	C17H17ClO6	CC1CC(=O)C=C(C12C(=O)C3=C(C=C(C(=C3O2)Cl)CO)OC)OC	GOKVEUZDIYKLTI-UHFFFAOYSA-N	7-chloro-6-(hydroxymethyl)-3',4-dimethoxy-5'-methylspiro[1-benzofuran-2,4'-cyclohex-2-ene]-1',3-dione
70870984	(2S,5'R)-7-chloro-3'-[2-(2-iodophenyl)ethyl]-4,6-dimethoxy-5'-methylspiro[1-benzofuran-2,4'-cyclohex-2-ene]-1',3-dione	552.8	C24H22ClIO5	C[C@@H]1CC(=O)C=C([C@]12C(=O)C3=C(O2)C(=C(C=C3OC)OC)Cl)CCC4=CC=CC=C4I	YCCKSKWLQSPEOK-OZAJXLCCSA-N	(2S,5'R)-7-chloro-3'-[2-(2-iodophenyl)ethyl]-4,6-dimethoxy-5'-methylspiro[1-benzofuran-2,4'-cyclohex-2-ene]-1',3-dione
70876805	(2S,5'R)-7-chloro-4,6-dimethoxy-5'-methyl-3'-(2-phenylethyl)spiro[1-benzofuran-2,4'-cyclohex-2-ene]-1',3-dione	426.9	C24H23ClO5	C[C@@H]1CC(=O)C=C([C@]12C(=O)C3=C(O2)C(=C(C=C3OC)OC)Cl)CCC4=CC=CC=C4	SVYSEMXUPDSBSY-SHACYNPGSA-N	(2S,5'R)-7-chloro-4,6-dimethoxy-5'-methyl-3'-(2-phenylethyl)spiro[1-benzofuran-2,4'-cyclohex-2-ene]-1',3-dione
71043635	(2S)-7-chloro-3'-(cyclopropylmethoxy)-4,6-dimethoxyspiro[1-benzofuran-2,4'-cyclohex-2-ene]-1',3-dione	378.8	C19H19ClO6	COC1=CC(=C(C2=C1C(=O)[C@]3(O2)CCC(=O)C=C3OCC4CC4)Cl)OC	HCCXKJHPCAKUBQ-IBGZPJMESA-N	(2S)-7-chloro-3'-(cyclopropylmethoxy)-4,6-dimethoxyspiro[1-benzofuran-2,4'-cyclohex-2-ene]-1',3-dione
71312580	Griseofulvin 13C17	369.64	C17H17ClO6	[13CH3][13C@@H]1[13CH2][13C](=O)[13CH]=[13C]([13C@]12[13C](=O)[13C]3=[13C](O2)[13C](=[13C]([13CH]=[13C]3O[13CH3])O[13CH3])Cl)O[13CH3]	DDUHZTYCFQRHIY-ZHYGDYSESA-N	(4S,5R)-7'-chloro-3,4',6'-tri((113C)methoxy)-5-(113C)methylspiro[(1,2,3,4,5,6-13C6)cyclohex-2-ene-4,2'-1-benzofuran]-1,3'-dione
71317160	Griseofulvic acid	338.74	C16H15ClO6	C[C@@H]1CC(=O)CC(=O)[C@]12C(=O)C3=C(O2)C(=C(C=C3OC)OC)Cl	YIQRSAKVWZVLDN-QZTNRIJFSA-N	(2S,5'R)-7-chloro-4,6-dimethoxy-5'-methylspiro[1-benzofuran-2,4'-cyclohexane]-1',3,3'-trione
71317161	(2S,5'R)-7-chloro-3',6-dimethoxy-5'-methyl-4-(trideuterio(113C)methoxy)spiro[1-benzofuran-2,4'-cyclohex-2-ene]-1',3-dione	356.77	C17H17ClO6	[2H][13C]([2H])([2H])OC1=CC(=C(C2=C1C(=O)[C@]3(O2)[C@@H](CC(=O)C=C3OC)C)Cl)OC	DDUHZTYCFQRHIY-IQVAYXSPSA-N	(2S,5'R)-7-chloro-3',6-dimethoxy-5'-methyl-4-(trideuterio(113C)methoxy)spiro[1-benzofuran-2,4'-cyclohex-2-ene]-1',3-dione
71318420	3(2H)-Benzofuranone, 7-chloro-4,6-dimethoxy-2-(phenylmethylene)-	316.7	C17H13ClO4	COC1=CC(=C(C2=C1C(=O)C(=CC3=CC=CC=C3)O2)Cl)OC	ROZXRVHHHIEKOW-UHFFFAOYSA-N	2-benzylidene-7-chloro-4,6-dimethoxy-1-benzofuran-3-one
71318422	3(2H)-Benzofuranone, 5-chloro-4,6-dimethoxy-2-(phenylmethylene)-	316.7	C17H13ClO4	COC1=C(C(=C2C(=C1)OC(=CC3=CC=CC=C3)C2=O)OC)Cl	ZLDKXDMAAMIYED-UHFFFAOYSA-N	2-benzylidene-5-chloro-4,6-dimethoxy-1-benzofuran-3-one
71737790	7-Chloro-4,6-dimethoxy-6'-methyl-2'-(methylthio)-spiro(benzofuran-2(3H),1'-(2)cyclohexene)-3,4'-dione	368.8	C17H17ClO5S	CC1CC(=O)C(=CC12C(=O)C3=C(O2)C(=C(C=C3OC)OC)Cl)SC	DJBWEQPZZMWNMA-UHFFFAOYSA-N	7-chloro-4,6-dimethoxy-5'-methyl-2'-methylsulfanylspiro[1-benzofuran-2,4'-cyclohex-2-ene]-1',3-dione
71763716	(2S)-2'-[[4-(Trimethylsilyl)benzyl]oxy]-4,6-dimethoxy-6'beta-methyl-7-chlorospiro[benzofuran-2(3H),1'-[2]cyclohexene]-3,4'-dione	501	C26H29ClO6Si	C[C@@H]1CC(=O)C=C([C@]12C(=O)C3=C(O2)C(=C(C=C3OC)OC)Cl)OCC4=CC=C(C=C4)[Si](C)(C)C	MXSDLNFTAMKGQE-WZQKQDCOSA-N	(2S,5'R)-7-chloro-4,6-dimethoxy-5'-methyl-3'-[(4-trimethylsilylphenyl)methoxy]spiro[1-benzofuran-2,4'-cyclohex-2-ene]-1',3-dione
71763717	(2S,5'R)-7-chloro-3'-[(4-(125I)iodanylphenyl)methoxy]-4,6-dimethoxy-5'-methylspiro[1-benzofuran-2,4'-cyclohex-2-ene]-1',3-dione	552.8	C23H20ClIO6	C[C@@H]1CC(=O)C=C([C@]12C(=O)C3=C(O2)C(=C(C=C3OC)OC)Cl)OCC4=CC=C(C=C4)[125I]	FHUFURVGAREWMX-UFCMWQRESA-N	(2S,5'R)-7-chloro-3'-[(4-(125I)iodanylphenyl)methoxy]-4,6-dimethoxy-5'-methylspiro[1-benzofuran-2,4'-cyclohex-2-ene]-1',3-dione
71764910	(2S,5'R)-7-chloro-3'-[(2-(125I)iodanylphenyl)methoxy]-4,6-dimethoxy-5'-methylspiro[1-benzofuran-2,4'-cyclohex-2-ene]-1',3-dione	552.8	C23H20ClIO6	C[C@@H]1CC(=O)C=C([C@]12C(=O)C3=C(O2)C(=C(C=C3OC)OC)Cl)OCC4=CC=CC=C4[125I]	UVDPVANUXBQYTA-UFCMWQRESA-N	(2S,5'R)-7-chloro-3'-[(2-(125I)iodanylphenyl)methoxy]-4,6-dimethoxy-5'-methylspiro[1-benzofuran-2,4'-cyclohex-2-ene]-1',3-dione
71764911	(2S,5'R)-7-chloro-3'-[(3-(125I)iodanylphenyl)methoxy]-4,6-dimethoxy-5'-methylspiro[1-benzofuran-2,4'-cyclohex-2-ene]-1',3-dione	552.8	C23H20ClIO6	C[C@@H]1CC(=O)C=C([C@]12C(=O)C3=C(O2)C(=C(C=C3OC)OC)Cl)OCC4=CC(=CC=C4)[125I]	BSTCRAQRULCJRT-UFCMWQRESA-N	(2S,5'R)-7-chloro-3'-[(3-(125I)iodanylphenyl)methoxy]-4,6-dimethoxy-5'-methylspiro[1-benzofuran-2,4'-cyclohex-2-ene]-1',3-dione
71777464	(2R,5'R)-7-chloro-4,6-dimethoxy-5'-methylspiro[1-benzofuran-2,4'-cyclohexane]-1',3,3'-trione	338.74	C16H15ClO6	C[C@@H]1CC(=O)CC(=O)[C@@]12C(=O)C3=C(O2)C(=C(C=C3OC)OC)Cl	YIQRSAKVWZVLDN-VGDKGRGNSA-N	(2R,5'R)-7-chloro-4,6-dimethoxy-5'-methylspiro[1-benzofuran-2,4'-cyclohexane]-1',3,3'-trione
72726987	Ethyl 2-[4-[(7-chloro-4,6-dimethoxy-3-oxo-1-benzofuran-2-ylidene)methyl]phenoxy]-2-methylpropanoate	446.9	C23H23ClO7	CCOC(=O)C(C)(C)OC1=CC=C(C=C1)C=C2C(=O)C3=C(O2)C(=C(C=C3OC)OC)Cl	PQBZHUJYZBRYTM-UHFFFAOYSA-N	ethyl 2-[4-[(7-chloro-4,6-dimethoxy-3-oxo-1-benzofuran-2-ylidene)methyl]phenoxy]-2-methylpropanoate
73053256	(2S,5'R)-7-chloro-4,6-dimethoxy-5'-methyl-3'-methylsulfonylspiro[1-benzofuran-2,4'-cyclohex-2-ene]-1',3-dione	400.8	C17H17ClO7S	C[C@@H]1CC(=O)C=C([C@@]12C(=O)C3=C(O2)C(=C(C=C3OC)OC)Cl)S(=O)(=O)C	PQROFVLRHSPJER-CQLKUDPESA-N	(2S,5'R)-7-chloro-4,6-dimethoxy-5'-methyl-3'-methylsulfonylspiro[1-benzofuran-2,4'-cyclohex-2-ene]-1',3-dione
73330625	(2S,2'S,6'R)-7-chloro-4,6-dimethoxy-6'-methyl-2'-phenylspiro[1-benzofuran-2,5'-2,3,6,7-tetrahydro-1-benzofuran]-3,4'-dione	440.9	C24H21ClO6	C[C@@H]1CC2=C(C[C@H](O2)C3=CC=CC=C3)C(=O)[C@]14C(=O)C5=C(O4)C(=C(C=C5OC)OC)Cl	VIDAZTLROWUZBN-PIQRMGSASA-N	(2S,2'S,6'R)-7-chloro-4,6-dimethoxy-6'-methyl-2'-phenylspiro[1-benzofuran-2,5'-2,3,6,7-tetrahydro-1-benzofuran]-3,4'-dione
73330762	(2S,2'R,6'R)-7-chloro-4,6-dimethoxy-2',6'-dimethyl-2'-phenylspiro[1-benzofuran-2,7'-5,6-dihydro-3H-1-benzofuran]-3,4'-dione	454.9	C25H23ClO6	C[C@@H]1CC(=O)C2=C([C@]13C(=O)C4=C(O3)C(=C(C=C4OC)OC)Cl)O[C@@](C2)(C)C5=CC=CC=C5	XXMYFHITKAVTSL-ZTSHRCRKSA-N	(2S,2'R,6'R)-7-chloro-4,6-dimethoxy-2',6'-dimethyl-2'-phenylspiro[1-benzofuran-2,7'-5,6-dihydro-3H-1-benzofuran]-3,4'-dione
73330763	(2S,6'R)-7-chloro-4,6-dimethoxy-6'-methyl-2',2'-diphenylspiro[1-benzofuran-2,5'-6,7-dihydro-3H-1-benzofuran]-3,4'-dione	517	C30H25ClO6	C[C@@H]1CC2=C(CC(O2)(C3=CC=CC=C3)C4=CC=CC=C4)C(=O)[C@]15C(=O)C6=C(O5)C(=C(C=C6OC)OC)Cl	PERIWIJOMCRPDH-ZQHDKMAOSA-N	(2S,6'R)-7-chloro-4,6-dimethoxy-6'-methyl-2',2'-diphenylspiro[1-benzofuran-2,5'-6,7-dihydro-3H-1-benzofuran]-3,4'-dione
73330764	(2S,6'R)-7-chloro-4,6-dimethoxy-6'-methyl-2',2'-diphenylspiro[1-benzofuran-2,7'-5,6-dihydro-3H-1-benzofuran]-3,4'-dione	517	C30H25ClO6	C[C@@H]1CC(=O)C2=C([C@]13C(=O)C4=C(O3)C(=C(C=C4OC)OC)Cl)OC(C2)(C5=CC=CC=C5)C6=CC=CC=C6	YOLUXCOYYFGAJX-BJLXPSRBSA-N	(2S,6'R)-7-chloro-4,6-dimethoxy-6'-methyl-2',2'-diphenylspiro[1-benzofuran-2,7'-5,6-dihydro-3H-1-benzofuran]-3,4'-dione
73330766	methyl 4-[(2S,2'S,6'R)-7-chloro-4,6-dimethoxy-6'-methyl-3,4'-dioxospiro[1-benzofuran-2,7'-2,3,5,6-tetrahydro-1-benzofuran]-2'-yl]benzoate	498.9	C26H23ClO8	C[C@@H]1CC(=O)C2=C([C@]13C(=O)C4=C(O3)C(=C(C=C4OC)OC)Cl)O[C@@H](C2)C5=CC=C(C=C5)C(=O)OC	IJNFANBVYKZWES-LCIOXHBFSA-N	methyl 4-[(2S,2'S,6'R)-7-chloro-4,6-dimethoxy-6'-methyl-3,4'-dioxospiro[1-benzofuran-2,7'-2,3,5,6-tetrahydro-1-benzofuran]-2'-yl]benzoate
73330910	methyl 4-[(2S,2'R,6'R)-7-chloro-4,6-dimethoxy-6'-methyl-3,4'-dioxospiro[1-benzofuran-2,7'-2,3,5,6-tetrahydro-1-benzofuran]-2'-yl]benzoate	498.9	C26H23ClO8	C[C@@H]1CC(=O)C2=C([C@]13C(=O)C4=C(O3)C(=C(C=C4OC)OC)Cl)O[C@H](C2)C5=CC=C(C=C5)C(=O)OC	IJNFANBVYKZWES-RAFFTOIBSA-N	methyl 4-[(2S,2'R,6'R)-7-chloro-4,6-dimethoxy-6'-methyl-3,4'-dioxospiro[1-benzofuran-2,7'-2,3,5,6-tetrahydro-1-benzofuran]-2'-yl]benzoate
73330911	2-[(2S,2'R,6'R)-7-chloro-4,6-dimethoxy-6'-methyl-3,4'-dioxo-2'-phenylspiro[1-benzofuran-2,7'-5,6-dihydro-3H-1-benzofuran]-2'-yl]ethyl acetate	527	C28H27ClO8	C[C@@H]1CC(=O)C2=C([C@]13C(=O)C4=C(O3)C(=C(C=C4OC)OC)Cl)O[C@](C2)(CCOC(=O)C)C5=CC=CC=C5	ANCNSUXIBIXEJP-ZXOINBKBSA-N	2-[(2S,2'R,6'R)-7-chloro-4,6-dimethoxy-6'-methyl-3,4'-dioxo-2'-phenylspiro[1-benzofuran-2,7'-5,6-dihydro-3H-1-benzofuran]-2'-yl]ethyl acetate
73330912	(2S,2'R,6'R)-7-chloro-2'-(4-hydroxybutyl)-4,6-dimethoxy-6'-methyl-2'-phenylspiro[1-benzofuran-2,7'-5,6-dihydro-3H-1-benzofuran]-3,4'-dione	513	C28H29ClO7	C[C@@H]1CC(=O)C2=C([C@]13C(=O)C4=C(O3)C(=C(C=C4OC)OC)Cl)O[C@@](C2)(CCCCO)C5=CC=CC=C5	LSVDGMZEAWHEEV-XBJZADGRSA-N	(2S,2'R,6'R)-7-chloro-2'-(4-hydroxybutyl)-4,6-dimethoxy-6'-methyl-2'-phenylspiro[1-benzofuran-2,7'-5,6-dihydro-3H-1-benzofuran]-3,4'-dione
73331060	(2S,2'S,6'R)-7-chloro-2'-(3,4-dichlorophenyl)-4,6-dimethoxy-6'-methylspiro[1-benzofuran-2,7'-2,3,5,6-tetrahydro-1-benzofuran]-3,4'-dione	509.8	C24H19Cl3O6	C[C@@H]1CC(=O)C2=C([C@]13C(=O)C4=C(O3)C(=C(C=C4OC)OC)Cl)O[C@@H](C2)C5=CC(=C(C=C5)Cl)Cl	PGSUOIYSAQIKBZ-DWBJOHEJSA-N	(2S,2'S,6'R)-7-chloro-2'-(3,4-dichlorophenyl)-4,6-dimethoxy-6'-methylspiro[1-benzofuran-2,7'-2,3,5,6-tetrahydro-1-benzofuran]-3,4'-dione
73331205	(2S,2'R,6'R)-7-chloro-2'-(3,4-dichlorophenyl)-4,6-dimethoxy-6'-methylspiro[1-benzofuran-2,7'-2,3,5,6-tetrahydro-1-benzofuran]-3,4'-dione	509.8	C24H19Cl3O6	C[C@@H]1CC(=O)C2=C([C@]13C(=O)C4=C(O3)C(=C(C=C4OC)OC)Cl)O[C@H](C2)C5=CC(=C(C=C5)Cl)Cl	PGSUOIYSAQIKBZ-WPUKFBOLSA-N	(2S,2'R,6'R)-7-chloro-2'-(3,4-dichlorophenyl)-4,6-dimethoxy-6'-methylspiro[1-benzofuran-2,7'-2,3,5,6-tetrahydro-1-benzofuran]-3,4'-dione
73331208	(2S,2'S,6'R)-7-chloro-2'-(4-fluorophenyl)-4,6-dimethoxy-6'-methylspiro[1-benzofuran-2,5'-2,3,6,7-tetrahydro-1-benzofuran]-3,4'-dione	458.9	C24H20ClFO6	C[C@@H]1CC2=C(C[C@H](O2)C3=CC=C(C=C3)F)C(=O)[C@]14C(=O)C5=C(O4)C(=C(C=C5OC)OC)Cl	IHKHGNOLJBRLOM-GBDDZHJPSA-N	(2S,2'S,6'R)-7-chloro-2'-(4-fluorophenyl)-4,6-dimethoxy-6'-methylspiro[1-benzofuran-2,5'-2,3,6,7-tetrahydro-1-benzofuran]-3,4'-dione
73331209	(2S,2'R,6'R)-7-chloro-2'-(4-fluorophenyl)-4,6-dimethoxy-6'-methylspiro[1-benzofuran-2,5'-2,3,6,7-tetrahydro-1-benzofuran]-3,4'-dione	458.9	C24H20ClFO6	C[C@@H]1CC2=C(C[C@@H](O2)C3=CC=C(C=C3)F)C(=O)[C@]14C(=O)C5=C(O4)C(=C(C=C5OC)OC)Cl	IHKHGNOLJBRLOM-XPUXWNRCSA-N	(2S,2'R,6'R)-7-chloro-2'-(4-fluorophenyl)-4,6-dimethoxy-6'-methylspiro[1-benzofuran-2,5'-2,3,6,7-tetrahydro-1-benzofuran]-3,4'-dione
73331344	(2S,6'R)-7-chloro-2'-(2-fluorophenyl)-4,6-dimethoxy-6'-methylspiro[1-benzofuran-2,5'-2,3,6,7-tetrahydro-1-benzofuran]-3,4'-dione	458.9	C24H20ClFO6	C[C@@H]1CC2=C(CC(O2)C3=CC=CC=C3F)C(=O)[C@]14C(=O)C5=C(O4)C(=C(C=C5OC)OC)Cl	TVPQTUXYESYXND-LMNWACSTSA-N	(2S,6'R)-7-chloro-2'-(2-fluorophenyl)-4,6-dimethoxy-6'-methylspiro[1-benzofuran-2,5'-2,3,6,7-tetrahydro-1-benzofuran]-3,4'-dione
73331345	(2S,2'S,6'R)-7-chloro-2'-(3-fluorophenyl)-4,6-dimethoxy-6'-methylspiro[1-benzofuran-2,7'-2,3,5,6-tetrahydro-1-benzofuran]-3,4'-dione	458.9	C24H20ClFO6	C[C@@H]1CC(=O)C2=C([C@]13C(=O)C4=C(O3)C(=C(C=C4OC)OC)Cl)O[C@@H](C2)C5=CC(=CC=C5)F	PGHHMXKMCOZAKB-LWPWGXQRSA-N	(2S,2'S,6'R)-7-chloro-2'-(3-fluorophenyl)-4,6-dimethoxy-6'-methylspiro[1-benzofuran-2,7'-2,3,5,6-tetrahydro-1-benzofuran]-3,4'-dione
73331346	(2S,2'R,6'R)-7-chloro-2'-(3-fluorophenyl)-4,6-dimethoxy-6'-methylspiro[1-benzofuran-2,7'-2,3,5,6-tetrahydro-1-benzofuran]-3,4'-dione	458.9	C24H20ClFO6	C[C@@H]1CC(=O)C2=C([C@]13C(=O)C4=C(O3)C(=C(C=C4OC)OC)Cl)O[C@H](C2)C5=CC(=CC=C5)F	PGHHMXKMCOZAKB-PVJMJOEKSA-N	(2S,2'R,6'R)-7-chloro-2'-(3-fluorophenyl)-4,6-dimethoxy-6'-methylspiro[1-benzofuran-2,7'-2,3,5,6-tetrahydro-1-benzofuran]-3,4'-dione
73331347	(2S,2'R,6'R)-7-chloro-2'-(4-fluorophenyl)-4,6-dimethoxy-6'-methylspiro[1-benzofuran-2,7'-2,3,5,6-tetrahydro-1-benzofuran]-3,4'-dione	458.9	C24H20ClFO6	C[C@@H]1CC(=O)C2=C([C@]13C(=O)C4=C(O3)C(=C(C=C4OC)OC)Cl)O[C@H](C2)C5=CC=C(C=C5)F	WZNNJKBLGNGLNN-PVJMJOEKSA-N	(2S,2'R,6'R)-7-chloro-2'-(4-fluorophenyl)-4,6-dimethoxy-6'-methylspiro[1-benzofuran-2,7'-2,3,5,6-tetrahydro-1-benzofuran]-3,4'-dione
73331348	(2S,2'S,6'R)-7-chloro-2'-(2-fluorophenyl)-4,6-dimethoxy-6'-methylspiro[1-benzofuran-2,7'-2,3,5,6-tetrahydro-1-benzofuran]-3,4'-dione	458.9	C24H20ClFO6	C[C@@H]1CC(=O)C2=C([C@]13C(=O)C4=C(O3)C(=C(C=C4OC)OC)Cl)O[C@@H](C2)C5=CC=CC=C5F	XMQWLKMSFCUZDK-LWPWGXQRSA-N	(2S,2'S,6'R)-7-chloro-2'-(2-fluorophenyl)-4,6-dimethoxy-6'-methylspiro[1-benzofuran-2,7'-2,3,5,6-tetrahydro-1-benzofuran]-3,4'-dione
73331349	(2S,2'R,6'R)-7-chloro-2'-(2-fluorophenyl)-4,6-dimethoxy-6'-methylspiro[1-benzofuran-2,7'-2,3,5,6-tetrahydro-1-benzofuran]-3,4'-dione	458.9	C24H20ClFO6	C[C@@H]1CC(=O)C2=C([C@]13C(=O)C4=C(O3)C(=C(C=C4OC)OC)Cl)O[C@H](C2)C5=CC=CC=C5F	XMQWLKMSFCUZDK-PVJMJOEKSA-N	(2S,2'R,6'R)-7-chloro-2'-(2-fluorophenyl)-4,6-dimethoxy-6'-methylspiro[1-benzofuran-2,7'-2,3,5,6-tetrahydro-1-benzofuran]-3,4'-dione
73331487	(2S,2'S,6'R)-7-chloro-4,6-dimethoxy-6'-methyl-2'-[4-(trifluoromethyl)phenyl]spiro[1-benzofuran-2,7'-2,3,5,6-tetrahydro-1-benzofuran]-3,4'-dione	508.9	C25H20ClF3O6	C[C@@H]1CC(=O)C2=C([C@]13C(=O)C4=C(O3)C(=C(C=C4OC)OC)Cl)O[C@@H](C2)C5=CC=C(C=C5)C(F)(F)F	XYVJEGLMXJCXSM-LWPWGXQRSA-N	(2S,2'S,6'R)-7-chloro-4,6-dimethoxy-6'-methyl-2'-[4-(trifluoromethyl)phenyl]spiro[1-benzofuran-2,7'-2,3,5,6-tetrahydro-1-benzofuran]-3,4'-dione
73331488	(2S,2'R,6'R)-7-chloro-4,6-dimethoxy-6'-methyl-2'-[4-(trifluoromethyl)phenyl]spiro[1-benzofuran-2,7'-2,3,5,6-tetrahydro-1-benzofuran]-3,4'-dione	508.9	C25H20ClF3O6	C[C@@H]1CC(=O)C2=C([C@]13C(=O)C4=C(O3)C(=C(C=C4OC)OC)Cl)O[C@H](C2)C5=CC=C(C=C5)C(F)(F)F	XYVJEGLMXJCXSM-PVJMJOEKSA-N	(2S,2'R,6'R)-7-chloro-4,6-dimethoxy-6'-methyl-2'-[4-(trifluoromethyl)phenyl]spiro[1-benzofuran-2,7'-2,3,5,6-tetrahydro-1-benzofuran]-3,4'-dione
73331490	(2S,2'R,6'R)-7-chloro-4,6-dimethoxy-6'-methyl-2'-phenylspiro[1-benzofuran-2,7'-2,3,5,6-tetrahydro-1-benzofuran]-3,4'-dione	440.9	C24H21ClO6	C[C@@H]1CC(=O)C2=C([C@]13C(=O)C4=C(O3)C(=C(C=C4OC)OC)Cl)O[C@H](C2)C5=CC=CC=C5	AYEOSSCPCFNOIC-FQVCVTIRSA-N	(2S,2'R,6'R)-7-chloro-4,6-dimethoxy-6'-methyl-2'-phenylspiro[1-benzofuran-2,7'-2,3,5,6-tetrahydro-1-benzofuran]-3,4'-dione
73331491	(2S,2'S,6'R)-7-chloro-4,6-dimethoxy-6'-methyl-2'-phenylspiro[1-benzofuran-2,7'-2,3,5,6-tetrahydro-1-benzofuran]-3,4'-dione	440.9	C24H21ClO6	C[C@@H]1CC(=O)C2=C([C@]13C(=O)C4=C(O3)C(=C(C=C4OC)OC)Cl)O[C@@H](C2)C5=CC=CC=C5	AYEOSSCPCFNOIC-ITNVVUHYSA-N	(2S,2'S,6'R)-7-chloro-4,6-dimethoxy-6'-methyl-2'-phenylspiro[1-benzofuran-2,7'-2,3,5,6-tetrahydro-1-benzofuran]-3,4'-dione
73331628	(2S,2'R,6'R)-2'-(2-bromoethyl)-7-chloro-4,6-dimethoxy-6'-methyl-2'-phenylspiro[1-benzofuran-2,7'-5,6-dihydro-3H-1-benzofuran]-3,4'-dione	547.8	C26H24BrClO6	C[C@@H]1CC(=O)C2=C([C@]13C(=O)C4=C(O3)C(=C(C=C4OC)OC)Cl)O[C@](C2)(CCBr)C5=CC=CC=C5	XRAJEIHWOSFQFE-DDHLINGLSA-N	(2S,2'R,6'R)-2'-(2-bromoethyl)-7-chloro-4,6-dimethoxy-6'-methyl-2'-phenylspiro[1-benzofuran-2,7'-5,6-dihydro-3H-1-benzofuran]-3,4'-dione
73331629	(2S,2'S,6'R)-2'-(2-bromoethyl)-7-chloro-4,6-dimethoxy-6'-methyl-2'-phenylspiro[1-benzofuran-2,7'-5,6-dihydro-3H-1-benzofuran]-3,4'-dione	547.8	C26H24BrClO6	C[C@@H]1CC(=O)C2=C([C@]13C(=O)C4=C(O3)C(=C(C=C4OC)OC)Cl)O[C@@](C2)(CCBr)C5=CC=CC=C5	XRAJEIHWOSFQFE-GIALVMGZSA-N	(2S,2'S,6'R)-2'-(2-bromoethyl)-7-chloro-4,6-dimethoxy-6'-methyl-2'-phenylspiro[1-benzofuran-2,7'-5,6-dihydro-3H-1-benzofuran]-3,4'-dione
73331632	(2R,2'R,6'S)-7-chloro-6'-hydroxy-4,6-dimethoxy-2'-methyl-6'-phenylspiro[1-benzofuran-2,1'-2,3,5,7,8,9-hexahydrobenzo[7]annulene]-3,4'-dione	482.9	C27H27ClO6	C[C@@H]1CC(=O)C2=C([C@@]13C(=O)C4=C(O3)C(=C(C=C4OC)OC)Cl)CCC[C@](C2)(C5=CC=CC=C5)O	UVZIUVJLYUTLMY-BLCUMICNSA-N	(2R,2'R,6'S)-7-chloro-6'-hydroxy-4,6-dimethoxy-2'-methyl-6'-phenylspiro[1-benzofuran-2,1'-2,3,5,7,8,9-hexahydrobenzo[7]annulene]-3,4'-dione
73331772	(2R,2'R,6'R)-7-chloro-6'-hydroxy-4,6-dimethoxy-2'-methyl-6'-phenylspiro[1-benzofuran-2,1'-2,3,5,7,8,9-hexahydrobenzo[7]annulene]-3,4'-dione	482.9	C27H27ClO6	C[C@@H]1CC(=O)C2=C([C@@]13C(=O)C4=C(O3)C(=C(C=C4OC)OC)Cl)CCC[C@@](C2)(C5=CC=CC=C5)O	UVZIUVJLYUTLMY-FEYIMHKFSA-N	(2R,2'R,6'R)-7-chloro-6'-hydroxy-4,6-dimethoxy-2'-methyl-6'-phenylspiro[1-benzofuran-2,1'-2,3,5,7,8,9-hexahydrobenzo[7]annulene]-3,4'-dione
74426566	3'-Benzylsulfanyl-7-chloro-4,6-dimethoxy-5'-methylspiro[1-benzofuran-2,4'-cyclohex-2-ene]-1',3-dione	444.9	C23H21ClO5S	CC1CC(=O)C=C(C12C(=O)C3=C(O2)C(=C(C=C3OC)OC)Cl)SCC4=CC=CC=C4	KOWBFBWFLFWGIE-UHFFFAOYSA-N	3'-benzylsulfanyl-7-chloro-4,6-dimethoxy-5'-methylspiro[1-benzofuran-2,4'-cyclohex-2-ene]-1',3-dione
75218801	3'-[[4-(Bromomethyl)phenyl]methoxy]-7-chloro-4,6-dimethoxy-5'-methylspiro[1-benzofuran-2,4'-cyclohex-2-ene]-1',3-dione	521.799	C24H22BrClO6	CC1CC(=O)C=C(C12C(=O)C3=C(O2)C(=C(C=C3OC)OC)Cl)OCC4=CC=C(C=C4)CBr	ZBBDWFLCPKFZLH-UHFFFAOYSA-N	3'-[[4-(bromomethyl)phenyl]methoxy]-7-chloro-4,6-dimethoxy-5'-methylspiro[1-benzofuran-2,4'-cyclohex-2-ene]-1',3-dione
75218823	7-Chloro-3'-[(2-chlorophenyl)methoxy]-4,6-dimethoxy-5'-methylspiro[1-benzofuran-2,4'-cyclohex-2-ene]-1',3-dione	463.3	C23H20Cl2O6	CC1CC(=O)C=C(C12C(=O)C3=C(O2)C(=C(C=C3OC)OC)Cl)OCC4=CC=CC=C4Cl	DBUZGDCVMBJCSC-UHFFFAOYSA-N	7-chloro-3'-[(2-chlorophenyl)methoxy]-4,6-dimethoxy-5'-methylspiro[1-benzofuran-2,4'-cyclohex-2-ene]-1',3-dione
75218824	3'-[(3-Bromophenyl)methoxy]-7-chloro-4,6-dimethoxy-5'-methylspiro[1-benzofuran-2,4'-cyclohex-2-ene]-1',3-dione	507.8	C23H20BrClO6	CC1CC(=O)C=C(C12C(=O)C3=C(O2)C(=C(C=C3OC)OC)Cl)OCC4=CC(=CC=C4)Br	UEAVERZUPZGGDF-UHFFFAOYSA-N	3'-[(3-bromophenyl)methoxy]-7-chloro-4,6-dimethoxy-5'-methylspiro[1-benzofuran-2,4'-cyclohex-2-ene]-1',3-dione
75218825	7-Chloro-3'-[(4-fluorophenyl)methoxy]-4,6-dimethoxy-5'-methylspiro[1-benzofuran-2,4'-cyclohex-2-ene]-1',3-dione	446.8	C23H20ClFO6	CC1CC(=O)C=C(C12C(=O)C3=C(O2)C(=C(C=C3OC)OC)Cl)OCC4=CC=C(C=C4)F	NTAZCCWXWQYSGM-UHFFFAOYSA-N	7-chloro-3'-[(4-fluorophenyl)methoxy]-4,6-dimethoxy-5'-methylspiro[1-benzofuran-2,4'-cyclohex-2-ene]-1',3-dione
75218847	3'-[(4-Butoxyphenyl)methoxy]-7-chloro-4,6-dimethoxy-5'-methylspiro[1-benzofuran-2,4'-cyclohex-2-ene]-1',3-dione	501	C27H29ClO7	CCCCOC1=CC=C(C=C1)COC2=CC(=O)CC(C23C(=O)C4=C(O3)C(=C(C=C4OC)OC)Cl)C	LJOJCLKSNAUYOE-UHFFFAOYSA-N	3'-[(4-butoxyphenyl)methoxy]-7-chloro-4,6-dimethoxy-5'-methylspiro[1-benzofuran-2,4'-cyclohex-2-ene]-1',3-dione
75218864	7-Chloro-4,6-dimethoxy-5'-methyl-3'-[[4-(trifluoromethyl)phenyl]methoxy]spiro[1-benzofuran-2,4'-cyclohex-2-ene]-1',3-dione	496.9	C24H20ClF3O6	CC1CC(=O)C=C(C12C(=O)C3=C(O2)C(=C(C=C3OC)OC)Cl)OCC4=CC=C(C=C4)C(F)(F)F	YUAHXBKVHLJFDM-UHFFFAOYSA-N	7-chloro-4,6-dimethoxy-5'-methyl-3'-[[4-(trifluoromethyl)phenyl]methoxy]spiro[1-benzofuran-2,4'-cyclohex-2-ene]-1',3-dione
75641496	7-Chloro-4,6-dimethoxy-5'-methyl-3,3'-dioxospiro[1-benzofuran-2,6'-cyclohexene]-1'-olate	337.73	C16H14ClO6-	CC1CC(=O)C=C(C12C(=O)C3=C(O2)C(=C(C=C3OC)OC)Cl)[O-]	KUTVEHNZHKAAAO-UHFFFAOYSA-M	7-chloro-4,6-dimethoxy-5'-methyl-3,3'-dioxospiro[1-benzofuran-2,6'-cyclohexene]-1'-olate
76964619	(2S)-7-Chloro-2'-methylthio-4,6-dimethoxy-6'alpha-methylspiro[benzofuran-2(3H),1'-cyclohexan]-2'-ene-3,4'-dione	368.8	C17H17ClO5S	C[C@H]1CC(=O)C=C([C@@]12C(=O)C3=C(O2)C(=C(C=C3OC)OC)Cl)SC	DCCZLOASKLQMQQ-WNWIJWBNSA-N	(2S,5'S)-7-chloro-4,6-dimethoxy-5'-methyl-3'-methylsulfanylspiro[1-benzofuran-2,4'-cyclohex-2-ene]-1',3-dione
76968174	(2R,5'S)-7-chloro-4,6-dimethoxy-5'-methyl-3'-methylsulfanylspiro[1-benzofuran-2,4'-cyclohex-2-ene]-1',3-dione	368.8	C17H17ClO5S	C[C@H]1CC(=O)C=C([C@]12C(=O)C3=C(O2)C(=C(C=C3OC)OC)Cl)SC	DCCZLOASKLQMQQ-QPFGOUBPSA-N	(2R,5'S)-7-chloro-4,6-dimethoxy-5'-methyl-3'-methylsulfanylspiro[1-benzofuran-2,4'-cyclohex-2-ene]-1',3-dione
76970921	(2R,5'S)-7-chloro-3',4,6-trimethoxy-5'-methylspiro[1-benzofuran-2,6'-cyclohex-2-ene]-1',3-dione	352.8	C17H17ClO6	C[C@H]1CC(=CC(=O)[C@@]12C(=O)C3=C(O2)C(=C(C=C3OC)OC)Cl)OC	FFKRWPQQTGWKIH-WNWIJWBNSA-N	(2R,5'S)-7-chloro-3',4,6-trimethoxy-5'-methylspiro[1-benzofuran-2,6'-cyclohex-2-ene]-1',3-dione
76973167	(2S,5'R)-7-chloro-4,6-dimethoxy-5'-methyl-3'-(trideuterio(113C)methoxy)spiro[1-benzofuran-2,4'-cyclohex-2-ene]-1',3-dione	356.77	C17H17ClO6	[2H][13C]([2H])([2H])OC1=CC(=O)C[C@H]([C@@]12C(=O)C3=C(O2)C(=C(C=C3OC)OC)Cl)C	DDUHZTYCFQRHIY-PODFOBPDSA-N	(2S,5'R)-7-chloro-4,6-dimethoxy-5'-methyl-3'-(trideuterio(113C)methoxy)spiro[1-benzofuran-2,4'-cyclohex-2-ene]-1',3-dione
76973812	(+)-Griseofulvin	355.8	C17H17ClO6	[2H]C([2H])([2H])OC1=CC(=O)C[C@H]([C@@]12C(=O)C3=C(O2)C(=C(C=C3OC)OC)Cl)C	DDUHZTYCFQRHIY-BCBJJHLGSA-N	(2S,5'R)-7-chloro-4,6-dimethoxy-5'-methyl-3'-(trideuteriomethoxy)spiro[1-benzofuran-2,4'-cyclohex-2-ene]-1',3-dione
84820866	Dimethyl 7-chloro-4,4',6-trimethoxy-6'-methyl-2',3-dioxospiro[1-benzofuran-2,5'-cyclohex-3-ene]-1',5-dicarboxylate	468.8	C21H21ClO10	CC1C(C(=O)C=C(C12C(=O)C3=C(O2)C(=C(C(=C3OC)C(=O)OC)OC)Cl)OC)C(=O)OC	DBSCVAHNPJOQAM-UHFFFAOYSA-N	dimethyl 7-chloro-4,4',6-trimethoxy-6'-methyl-2',3-dioxospiro[1-benzofuran-2,5'-cyclohex-3-ene]-1',5-dicarboxylate
85199072	7-Chloro-3'-ethylsulfanyl-4,6-dimethoxy-5'-methylspiro[1-benzofuran-2,4'-cyclohex-2-ene]-1',3-dione	382.9	C18H19ClO5S	CCSC1=CC(=O)CC(C12C(=O)C3=C(O2)C(=C(C=C3OC)OC)Cl)C	ZZTHRMLYTFHFIP-UHFFFAOYSA-N	7-chloro-3'-ethylsulfanyl-4,6-dimethoxy-5'-methylspiro[1-benzofuran-2,4'-cyclohex-2-ene]-1',3-dione
89050851	CID 89050851	452.7	C24H22BClO6	[B]CC1=CC=C(C=C1)COC2=CC(=O)C[C@H]([C@@]23C(=O)C4=C(O3)C(=C(C=C4OC)OC)Cl)C	BVNMSMWBUXENRB-OZAJXLCCSA-N	NULL
89054741	(2S,5'R)-7-chloro-4,6-dimethoxy-5'-methyl-3'-[(Z,2E)-2-prop-2-enylidenehex-3-enoxy]spiro[1-benzofuran-2,4'-cyclohex-2-ene]-1',3-dione	458.9	C25H27ClO6	CC/C=C\\C(=C/C=C)\\COC1=CC(=O)C[C@H]([C@@]12C(=O)C3=C(O2)C(=C(C=C3OC)OC)Cl)C	MKIWGUQTCJEYAP-WTLBAXSQSA-N	(2S,5'R)-7-chloro-4,6-dimethoxy-5'-methyl-3'-[(Z,2E)-2-prop-2-enylidenehex-3-enoxy]spiro[1-benzofuran-2,4'-cyclohex-2-ene]-1',3-dione
89798228	(2S,5'R)-7-chloro-6-(hydroxymethyl)-3',4-dimethoxy-5'-methylspiro[1-benzofuran-2,4'-cyclohex-2-ene]-1',3-dione	352.8	C17H17ClO6	C[C@@H]1CC(=O)C=C([C@]12C(=O)C3=C(C=C(C(=C3O2)Cl)CO)OC)OC	GOKVEUZDIYKLTI-RBHXEPJQSA-N	(2S,5'R)-7-chloro-6-(hydroxymethyl)-3',4-dimethoxy-5'-methylspiro[1-benzofuran-2,4'-cyclohex-2-ene]-1',3-dione
90958864	7-Chloro-4,6-dimethoxy-5'-methyl-3'-[(2-methylphenyl)methoxy]spiro[1-benzofuran-2,4'-cyclohex-2-ene]-1',3-dione	442.9	C24H23ClO6	CC1CC(=O)C=C(C12C(=O)C3=C(O2)C(=C(C=C3OC)OC)Cl)OCC4=CC=CC=C4C	VEMSWLYSQOYCCM-UHFFFAOYSA-N	7-chloro-4,6-dimethoxy-5'-methyl-3'-[(2-methylphenyl)methoxy]spiro[1-benzofuran-2,4'-cyclohex-2-ene]-1',3-dione
91035900	7-chloro-4,6-dimethoxy-7'-methyl-3'-octylspiro[1-benzofuran-2,8'-3,4,6,7-tetrahydro-2H-chromene]-3,5'-dione	491	C27H35ClO6	CCCCCCCCC1CC2=C(C3(C(CC2=O)C)C(=O)C4=C(O3)C(=C(C=C4OC)OC)Cl)OC1	WCLZDFDSYFIVCJ-UHFFFAOYSA-N	7-chloro-4,6-dimethoxy-7'-methyl-3'-octylspiro[1-benzofuran-2,8'-3,4,6,7-tetrahydro-2H-chromene]-3,5'-dione
91109362	7-Chloro-2'-ethyl-4,6-dimethoxy-5'-methyl-3'-propoxyspiro[1-benzofuran-2,4'-cyclohex-2-ene]-1',3-dione	408.9	C21H25ClO6	CCCOC1=C(C(=O)CC(C12C(=O)C3=C(O2)C(=C(C=C3OC)OC)Cl)C)CC	DDRHZOXXLIEFKU-UHFFFAOYSA-N	7-chloro-2'-ethyl-4,6-dimethoxy-5'-methyl-3'-propoxyspiro[1-benzofuran-2,4'-cyclohex-2-ene]-1',3-dione
91564943	7-Chloro-3'-[(3-ethylphenyl)methoxy]-4,6-dimethoxy-5'-methylspiro[1-benzofuran-2,4'-cyclohex-2-ene]-1',3-dione	456.9	C25H25ClO6	CCC1=CC(=CC=C1)COC2=CC(=O)CC(C23C(=O)C4=C(O3)C(=C(C=C4OC)OC)Cl)C	BMJLMLQBRCJSDJ-UHFFFAOYSA-N	7-chloro-3'-[(3-ethylphenyl)methoxy]-4,6-dimethoxy-5'-methylspiro[1-benzofuran-2,4'-cyclohex-2-ene]-1',3-dione
91820110	Desmethyl-dehydro-griseofulvin	336.72	C16H13ClO6	CC1=CC(=O)C=C([C@]12C(=O)C3=C(O2)C(=C(C=C3O)OC)Cl)OC	CBXSKYYDMDVVJP-INIZCTEOSA-N	(2S)-7-chloro-4-hydroxy-3',6-dimethoxy-5'-methylspiro[1-benzofuran-2,4'-cyclohexa-2,5-diene]-1',3-dione
92222230	(2R,3'S,5'R)-7-chloro-3'-hydroxy-1',4,6-trimethoxy-5'-methylspiro[1-benzofuran-2,6'-cyclohexene]-3-one	354.8	C17H19ClO6	C[C@@H]1C[C@@H](C=C([C@@]12C(=O)C3=C(O2)C(=C(C=C3OC)OC)Cl)OC)O	QDNCNBBKBODBDR-KSRUKNBBSA-N	(2R,3'S,5'R)-7-chloro-3'-hydroxy-1',4,6-trimethoxy-5'-methylspiro[1-benzofuran-2,6'-cyclohexene]-3-one
92222231	(2R,3'S,5'S)-7-chloro-3'-hydroxy-1',4,6-trimethoxy-5'-methylspiro[1-benzofuran-2,6'-cyclohexene]-3-one	354.8	C17H19ClO6	C[C@H]1C[C@@H](C=C([C@@]12C(=O)C3=C(O2)C(=C(C=C3OC)OC)Cl)OC)O	QDNCNBBKBODBDR-IRWWLHRVSA-N	(2R,3'S,5'S)-7-chloro-3'-hydroxy-1',4,6-trimethoxy-5'-methylspiro[1-benzofuran-2,6'-cyclohexene]-3-one
92222232	(2R,3'R,5'R)-7-chloro-3'-hydroxy-1',4,6-trimethoxy-5'-methylspiro[1-benzofuran-2,6'-cyclohexene]-3-one	354.8	C17H19ClO6	C[C@@H]1C[C@H](C=C([C@@]12C(=O)C3=C(O2)C(=C(C=C3OC)OC)Cl)OC)O	QDNCNBBKBODBDR-CGMALJKESA-N	(2R,3'R,5'R)-7-chloro-3'-hydroxy-1',4,6-trimethoxy-5'-methylspiro[1-benzofuran-2,6'-cyclohexene]-3-one
92222233	(2R,3'R,5'S)-7-chloro-3'-hydroxy-1',4,6-trimethoxy-5'-methylspiro[1-benzofuran-2,6'-cyclohexene]-3-one	354.8	C17H19ClO6	C[C@H]1C[C@H](C=C([C@@]12C(=O)C3=C(O2)C(=C(C=C3OC)OC)Cl)OC)O	QDNCNBBKBODBDR-MRAOVIAESA-N	(2R,3'R,5'S)-7-chloro-3'-hydroxy-1',4,6-trimethoxy-5'-methylspiro[1-benzofuran-2,6'-cyclohexene]-3-one
92860931	(2S,6'R)-4,4'-Dimethoxy-6-hydroxy-6'beta-methyl-7-chlorospiro[benzofuran-2(3H),1'-[3]cyclohexene]-3,2'-dione	338.74	C16H15ClO6	C[C@@H]1CC(=CC(=O)[C@]12C(=O)C3=C(C=C(C(=C3O2)Cl)O)OC)OC	BOBFBEVZUHZXCZ-QZTNRIJFSA-N	(2S,5'R)-7-chloro-6-hydroxy-3',4-dimethoxy-5'-methylspiro[1-benzofuran-2,6'-cyclohex-2-ene]-1',3-dione
95988133	(2R,6'R)-7-chloro-2',4,6-trimethoxy-6'-methylspiro[1-benzofuran-2,4'-cyclohex-2-ene]-1',3-dione	352.8	C17H17ClO6	C[C@@H]1C[C@@]2(C=C(C1=O)OC)C(=O)C3=C(O2)C(=C(C=C3OC)OC)Cl	SPLQSELLVJQFGL-CQLKUDPESA-N	(2R,6'R)-7-chloro-2',4,6-trimethoxy-6'-methylspiro[1-benzofuran-2,4'-cyclohex-2-ene]-1',3-dione
95988134	(2R,6'S)-7-chloro-2',4,6-trimethoxy-6'-methylspiro[1-benzofuran-2,4'-cyclohex-2-ene]-1',3-dione	352.8	C17H17ClO6	C[C@H]1C[C@@]2(C=C(C1=O)OC)C(=O)C3=C(O2)C(=C(C=C3OC)OC)Cl	SPLQSELLVJQFGL-WNWIJWBNSA-N	(2R,6'S)-7-chloro-2',4,6-trimethoxy-6'-methylspiro[1-benzofuran-2,4'-cyclohex-2-ene]-1',3-dione
95988135	(2S,6'R)-7-chloro-2',4,6-trimethoxy-6'-methylspiro[1-benzofuran-2,4'-cyclohex-2-ene]-1',3-dione	352.8	C17H17ClO6	C[C@@H]1C[C@]2(C=C(C1=O)OC)C(=O)C3=C(O2)C(=C(C=C3OC)OC)Cl	SPLQSELLVJQFGL-RBHXEPJQSA-N	(2S,6'R)-7-chloro-2',4,6-trimethoxy-6'-methylspiro[1-benzofuran-2,4'-cyclohex-2-ene]-1',3-dione
95988136	(2S,6'S)-7-chloro-2',4,6-trimethoxy-6'-methylspiro[1-benzofuran-2,4'-cyclohex-2-ene]-1',3-dione	352.8	C17H17ClO6	C[C@H]1C[C@]2(C=C(C1=O)OC)C(=O)C3=C(O2)C(=C(C=C3OC)OC)Cl	SPLQSELLVJQFGL-QPFGOUBPSA-N	(2S,6'S)-7-chloro-2',4,6-trimethoxy-6'-methylspiro[1-benzofuran-2,4'-cyclohex-2-ene]-1',3-dione
98058924	(2R,5'R)-7-chloro-6-hydroxy-4-methoxy-5'-methylspiro[1-benzofuran-2,4'-cyclohexane]-1',3,3'-trione	324.71	C15H13ClO6	C[C@@H]1CC(=O)CC(=O)[C@@]12C(=O)C3=C(C=C(C(=C3O2)Cl)O)OC	SXCNFUDOBRUGOV-NPMWZIQKSA-N	(2R,5'R)-7-chloro-6-hydroxy-4-methoxy-5'-methylspiro[1-benzofuran-2,4'-cyclohexane]-1',3,3'-trione
98058925	(2R,5'S)-7-chloro-6-hydroxy-4-methoxy-5'-methylspiro[1-benzofuran-2,4'-cyclohexane]-1',3,3'-trione	324.71	C15H13ClO6	C[C@H]1CC(=O)CC(=O)[C@@]12C(=O)C3=C(C=C(C(=C3O2)Cl)O)OC	SXCNFUDOBRUGOV-WDDATRMLSA-N	(2R,5'S)-7-chloro-6-hydroxy-4-methoxy-5'-methylspiro[1-benzofuran-2,4'-cyclohexane]-1',3,3'-trione
98058926	(2S,5'R)-7-chloro-6-hydroxy-4-methoxy-5'-methylspiro[1-benzofuran-2,4'-cyclohexane]-1',3,3'-trione	324.71	C15H13ClO6	C[C@@H]1CC(=O)CC(=O)[C@]12C(=O)C3=C(C=C(C(=C3O2)Cl)O)OC	SXCNFUDOBRUGOV-BAHMLBHCSA-N	(2S,5'R)-7-chloro-6-hydroxy-4-methoxy-5'-methylspiro[1-benzofuran-2,4'-cyclohexane]-1',3,3'-trione
98058927	(2S,5'S)-7-chloro-6-hydroxy-4-methoxy-5'-methylspiro[1-benzofuran-2,4'-cyclohexane]-1',3,3'-trione	324.71	C15H13ClO6	C[C@H]1CC(=O)CC(=O)[C@]12C(=O)C3=C(C=C(C(=C3O2)Cl)O)OC	SXCNFUDOBRUGOV-XHLQUELWSA-N	(2S,5'S)-7-chloro-6-hydroxy-4-methoxy-5'-methylspiro[1-benzofuran-2,4'-cyclohexane]-1',3,3'-trione
98125634	dimethyl (1'S,2R,6'R)-7-chloro-4,4',6-trimethoxy-6'-methyl-2',3-dioxospiro[1-benzofuran-2,5'-cyclohex-3-ene]-1',5-dicarboxylate	468.8	C21H21ClO10	C[C@@H]1[C@@H](C(=O)C=C([C@@]12C(=O)C3=C(O2)C(=C(C(=C3OC)C(=O)OC)OC)Cl)OC)C(=O)OC	DBSCVAHNPJOQAM-KJLUZHGOSA-N	dimethyl (1'S,2R,6'R)-7-chloro-4,4',6-trimethoxy-6'-methyl-2',3-dioxospiro[1-benzofuran-2,5'-cyclohex-3-ene]-1',5-dicarboxylate
98125635	dimethyl (1'S,2R,6'S)-7-chloro-4,4',6-trimethoxy-6'-methyl-2',3-dioxospiro[1-benzofuran-2,5'-cyclohex-3-ene]-1',5-dicarboxylate	468.8	C21H21ClO10	C[C@H]1[C@@H](C(=O)C=C([C@@]12C(=O)C3=C(O2)C(=C(C(=C3OC)C(=O)OC)OC)Cl)OC)C(=O)OC	DBSCVAHNPJOQAM-PZLHRIISSA-N	dimethyl (1'S,2R,6'S)-7-chloro-4,4',6-trimethoxy-6'-methyl-2',3-dioxospiro[1-benzofuran-2,5'-cyclohex-3-ene]-1',5-dicarboxylate
98125636	dimethyl (1'R,2R,6'R)-7-chloro-4,4',6-trimethoxy-6'-methyl-2',3-dioxospiro[1-benzofuran-2,5'-cyclohex-3-ene]-1',5-dicarboxylate	468.8	C21H21ClO10	C[C@@H]1[C@H](C(=O)C=C([C@@]12C(=O)C3=C(O2)C(=C(C(=C3OC)C(=O)OC)OC)Cl)OC)C(=O)OC	DBSCVAHNPJOQAM-XUDSXTTASA-N	dimethyl (1'R,2R,6'R)-7-chloro-4,4',6-trimethoxy-6'-methyl-2',3-dioxospiro[1-benzofuran-2,5'-cyclohex-3-ene]-1',5-dicarboxylate
98125637	dimethyl (1'R,2R,6'S)-7-chloro-4,4',6-trimethoxy-6'-methyl-2',3-dioxospiro[1-benzofuran-2,5'-cyclohex-3-ene]-1',5-dicarboxylate	468.8	C21H21ClO10	C[C@H]1[C@H](C(=O)C=C([C@@]12C(=O)C3=C(O2)C(=C(C(=C3OC)C(=O)OC)OC)Cl)OC)C(=O)OC	DBSCVAHNPJOQAM-GSADZCJLSA-N	dimethyl (1'R,2R,6'S)-7-chloro-4,4',6-trimethoxy-6'-methyl-2',3-dioxospiro[1-benzofuran-2,5'-cyclohex-3-ene]-1',5-dicarboxylate
98159926	(2S,3'R,5'S)-7-chloro-3'-hydroxy-1',4,6-trimethoxy-5'-methylspiro[1-benzofuran-2,6'-cyclohexene]-3-one	354.8	C17H19ClO6	C[C@H]1C[C@H](C=C([C@]12C(=O)C3=C(O2)C(=C(C=C3OC)OC)Cl)OC)O	QDNCNBBKBODBDR-BTKFHORUSA-N	(2S,3'R,5'S)-7-chloro-3'-hydroxy-1',4,6-trimethoxy-5'-methylspiro[1-benzofuran-2,6'-cyclohexene]-3-one
98159927	(2S,3'R,5'R)-7-chloro-3'-hydroxy-1',4,6-trimethoxy-5'-methylspiro[1-benzofuran-2,6'-cyclohexene]-3-one	354.8	C17H19ClO6	C[C@@H]1C[C@H](C=C([C@]12C(=O)C3=C(O2)C(=C(C=C3OC)OC)Cl)OC)O	QDNCNBBKBODBDR-MHIIWPAESA-N	(2S,3'R,5'R)-7-chloro-3'-hydroxy-1',4,6-trimethoxy-5'-methylspiro[1-benzofuran-2,6'-cyclohexene]-3-one
99908084	ethyl 2-[4-[(E)-(7-chloro-4,6-dimethoxy-3-oxo-1-benzofuran-2-ylidene)methyl]phenoxy]-2-methylpropanoate	446.9	C23H23ClO7	CCOC(=O)C(C)(C)OC1=CC=C(C=C1)/C=C/2\\C(=O)C3=C(O2)C(=C(C=C3OC)OC)Cl	PQBZHUJYZBRYTM-GZTJUZNOSA-N	ethyl 2-[4-[(E)-(7-chloro-4,6-dimethoxy-3-oxo-1-benzofuran-2-ylidene)methyl]phenoxy]-2-methylpropanoate
101288398	(2S)-7-Chloro-5'beta-hydroxy-2',4,6-trimethoxy-6'beta-methylspiro[benzofuran-2(3H),1'-[2]cyclohexene]-3,4'-dione	368.8	C17H17ClO7	C[C@@H]1[C@@H](C(=O)C=C([C@]12C(=O)C3=C(O2)C(=C(C=C3OC)OC)Cl)OC)O	SJUXBYNINSBOOT-WVKLCRKESA-N	(2S,5'R,6'S)-7-chloro-6'-hydroxy-3',4,6-trimethoxy-5'-methylspiro[1-benzofuran-2,4'-cyclohex-2-ene]-1',3-dione
101592379	7-Chloro-4,6-dimethoxyspiro[benzofuran-2(3H),1'-cyclohexane]-3,4'-dione	310.73	C15H15ClO5	COC1=CC(=C(C2=C1C(=O)C3(O2)CCC(=O)CC3)Cl)OC	MUSBRAPSWYXCFA-UHFFFAOYSA-N	7-chloro-4,6-dimethoxyspiro[1-benzofuran-2,4'-cyclohexane]-1',3-dione
101592382	(2S,6'S)-7-Chloro-2',4,6-trimethoxy-6'-ethylspiro[benzofuran-2(3H),1'-[2]cyclohexene]-3,4'-dione	366.8	C18H19ClO6	CC[C@H]1CC(=O)C=C([C@]12C(=O)C3=C(O2)C(=C(C=C3OC)OC)Cl)OC	SELNQQUJXLLOII-YYSFKGJASA-N	(2S,5'S)-7-chloro-5'-ethyl-3',4,6-trimethoxyspiro[1-benzofuran-2,4'-cyclohex-2-ene]-1',3-dione
101749852	2-(1-Methyl-3-oxobutyl)-3-oxo-4,6-dimethoxy-7-chloro-2,3-dihydrobenzofuran-2-carboxylic acid tert-butyl ester	412.9	C20H25ClO7	CC(CC(=O)C)C1(C(=O)C2=C(O1)C(=C(C=C2OC)OC)Cl)C(=O)OC(C)(C)C	WDYLWHWQSDPMNU-UHFFFAOYSA-N	tert-butyl 7-chloro-4,6-dimethoxy-3-oxo-2-(4-oxopentan-2-yl)-1-benzofuran-2-carboxylate
101749855	3-Oxo-4,6-dimethoxy-7-chloro-2,3-dihydrobenzofuran-2-carboxylic acid tert-butyl ester	328.74	C15H17ClO6	CC(C)(C)OC(=O)C1C(=O)C2=C(O1)C(=C(C=C2OC)OC)Cl	XHGQSBYLNGTRSI-UHFFFAOYSA-N	tert-butyl 7-chloro-4,6-dimethoxy-3-oxo-1-benzofuran-2-carboxylate
102066898	2-(Demethoxy)ethylthio-griseofulvin	382.9	C18H19ClO5S	CCSC1=CC(=O)C[C@H]([C@@]12C(=O)C3=C(O2)C(=C(C=C3OC)OC)Cl)C	ZZTHRMLYTFHFIP-LZVRBXCZSA-N	(2R,5'R)-7-chloro-3'-ethylsulfanyl-4,6-dimethoxy-5'-methylspiro[1-benzofuran-2,4'-cyclohex-2-ene]-1',3-dione
102066899	(2R)-4,6-Dimethoxy-4'-(ethylthio)-6'beta-ethyl-7-chlorospiro[benzofuran-2(3H),1'-[3]cyclohexene]-2',3-dione	396.9	C19H21ClO5S	CC[C@@H]1CC(=CC(=O)[C@@]12C(=O)C3=C(O2)C(=C(C=C3OC)OC)Cl)SCC	RNLOZDJLCYZWDU-GIGQVBGESA-N	(2R,5'R)-7-chloro-5'-ethyl-3'-ethylsulfanyl-4,6-dimethoxyspiro[1-benzofuran-2,6'-cyclohex-2-ene]-1',3-dione
102102400	(2S)-2'-[[3-(Trimethylsilyl)benzyl]oxy]-4,6-dimethoxy-6'beta-methyl-7-chlorospiro[benzofuran-2(3H),1'-[2]cyclohexene]-3,4'-dione	501	C26H29ClO6Si	C[C@@H]1CC(=O)C=C([C@]12C(=O)C3=C(O2)C(=C(C=C3OC)OC)Cl)OCC4=CC(=CC=C4)[Si](C)(C)C	PTLZXHJTWVBPJN-WZQKQDCOSA-N	(2S,5'R)-7-chloro-4,6-dimethoxy-5'-methyl-3'-[(3-trimethylsilylphenyl)methoxy]spiro[1-benzofuran-2,4'-cyclohex-2-ene]-1',3-dione
102102401	(2S)-2'-[[2-(Trimethylsilyl)benzyl]oxy]-4,6-dimethoxy-6'beta-methyl-7-chlorospiro[benzofuran-2(3H),1'-[2]cyclohexene]-3,4'-dione	501	C26H29ClO6Si	C[C@@H]1CC(=O)C=C([C@]12C(=O)C3=C(O2)C(=C(C=C3OC)OC)Cl)OCC4=CC=CC=C4[Si](C)(C)C	MDTCMWWUAMUELP-WZQKQDCOSA-N	(2S,5'R)-7-chloro-4,6-dimethoxy-5'-methyl-3'-[(2-trimethylsilylphenyl)methoxy]spiro[1-benzofuran-2,4'-cyclohex-2-ene]-1',3-dione
102239942	7-Chloro-4,4',6-trimethoxyspiro[benzofuran-2(3H),1'-cyclohexan]-3'-ene-2',3-dione	338.74	C16H15ClO6	COC1=CC(=O)C2(CC1)C(=O)C3=C(O2)C(=C(C=C3OC)OC)Cl	CAMDLTXKPDIRSF-UHFFFAOYSA-N	7-chloro-3',4,6-trimethoxyspiro[1-benzofuran-2,6'-cyclohex-2-ene]-1',3-dione
118207010	(2S,4'R)-7-chloro-4,6-dimethoxy-4'-methylspiro[1-benzofuran-2,5'-7-oxabicyclo[4.1.0]heptane]-2',3-dione	338.74	C16H15ClO6	C[C@@H]1CC(=O)C2C([C@]13C(=O)C4=C(O3)C(=C(C=C4OC)OC)Cl)O2	VTKGZGMULYQHPJ-LYHQMKPLSA-N	(2S,4'R)-7-chloro-4,6-dimethoxy-4'-methylspiro[1-benzofuran-2,5'-7-oxabicyclo[4.1.0]heptane]-2',3-dione
118207067	(2R,5'R)-7-chloro-4,6-dimethoxy-5'-methyl-3'-methylsulfonylspiro[1-benzofuran-2,4'-cyclohex-2-ene]-1',3-dione	400.8	C17H17ClO7S	C[C@@H]1CC(=O)C=C([C@]12C(=O)C3=C(O2)C(=C(C=C3OC)OC)Cl)S(=O)(=O)C	PQROFVLRHSPJER-RBHXEPJQSA-N	(2R,5'R)-7-chloro-4,6-dimethoxy-5'-methyl-3'-methylsulfonylspiro[1-benzofuran-2,4'-cyclohex-2-ene]-1',3-dione
118218025	(5'R)-3'-benzylsulfanyl-7-chloro-4,6-dimethoxy-5'-methylspiro[1-benzofuran-2,4'-cyclohex-2-ene]-1',3-dione	444.9	C23H21ClO5S	C[C@@H]1CC(=O)C=C(C12C(=O)C3=C(O2)C(=C(C=C3OC)OC)Cl)SCC4=CC=CC=C4	KOWBFBWFLFWGIE-JHQYKTOJSA-N	(5'R)-3'-benzylsulfanyl-7-chloro-4,6-dimethoxy-5'-methylspiro[1-benzofuran-2,4'-cyclohex-2-ene]-1',3-dione
118254083	(2S,2'S,6'R)-7-chloro-4,6-dimethoxy-2',6'-dimethyl-2'-phenylspiro[1-benzofuran-2,7'-5,6-dihydro-3H-1-benzofuran]-3,4'-dione	454.9	C25H23ClO6	C[C@@H]1CC(=O)C2=C([C@]13C(=O)C4=C(O3)C(=C(C=C4OC)OC)Cl)O[C@](C2)(C)C5=CC=CC=C5	XXMYFHITKAVTSL-QTBUGSGMSA-N	(2S,2'S,6'R)-7-chloro-4,6-dimethoxy-2',6'-dimethyl-2'-phenylspiro[1-benzofuran-2,7'-5,6-dihydro-3H-1-benzofuran]-3,4'-dione
118254099	(2S,7'R)-7-chloro-2'-ethoxy-4,6-dimethoxy-7'-methylspiro[1-benzofuran-2,6'-3,4,7,8-tetrahydro-2H-chromene]-3,5'-dione	422.9	C21H23ClO7	CCOC1CCC2=C(O1)C[C@H]([C@]3(C2=O)C(=O)C4=C(O3)C(=C(C=C4OC)OC)Cl)C	GPCYBFHQQMQASF-XYUZCHQGSA-N	(2S,7'R)-7-chloro-2'-ethoxy-4,6-dimethoxy-7'-methylspiro[1-benzofuran-2,6'-3,4,7,8-tetrahydro-2H-chromene]-3,5'-dione
118254103	(2S,3'R,6'R)-7-chloro-4,6-dimethoxy-6'-methyl-3'-phenylspiro[1-benzofuran-2,5'-2,3,6,7-tetrahydro-1-benzofuran]-3,4'-dione	440.9	C24H21ClO6	C[C@@H]1CC2=C([C@H](CO2)C3=CC=CC=C3)C(=O)[C@]14C(=O)C5=C(O4)C(=C(C=C5OC)OC)Cl	AZQIJNBWYDEOCT-XYWAVCLCSA-N	(2S,3'R,6'R)-7-chloro-4,6-dimethoxy-6'-methyl-3'-phenylspiro[1-benzofuran-2,5'-2,3,6,7-tetrahydro-1-benzofuran]-3,4'-dione
118254121	(2S,6'R)-7-chloro-4'-hydroxy-4,6-dimethoxy-6'-methyl-2'-phenylspiro[1-benzofuran-2,7'-3,4,5,6-tetrahydro-2H-1-benzofuran]-3-one	442.9	C24H23ClO6	C[C@@H]1CC(C2=C([C@]13C(=O)C4=C(O3)C(=C(C=C4OC)OC)Cl)OC(C2)C5=CC=CC=C5)O	DTSDWTFUBIGMFZ-FBZNLJJASA-N	(2S,6'R)-7-chloro-4'-hydroxy-4,6-dimethoxy-6'-methyl-2'-phenylspiro[1-benzofuran-2,7'-3,4,5,6-tetrahydro-2H-1-benzofuran]-3-one
118254131	(2S,3'S,6'R)-7-chloro-4,6-dimethoxy-6'-methyl-3'-phenylspiro[1-benzofuran-2,5'-2,3,6,7-tetrahydro-1-benzofuran]-3,4'-dione	440.9	C24H21ClO6	C[C@@H]1CC2=C([C@@H](CO2)C3=CC=CC=C3)C(=O)[C@]14C(=O)C5=C(O4)C(=C(C=C5OC)OC)Cl	AZQIJNBWYDEOCT-GTVBZTTRSA-N	(2S,3'S,6'R)-7-chloro-4,6-dimethoxy-6'-methyl-3'-phenylspiro[1-benzofuran-2,5'-2,3,6,7-tetrahydro-1-benzofuran]-3,4'-dione
118254142	(2S,3'R)-7-chloro-4,6-dimethoxy-3'-methylspiro[1-benzofuran-2,4'-3,6-dihydro-2H-benzo[c]chromene]-1',3-dione	426.8	C23H19ClO6	C[C@@H]1CC(=O)C2=C([C@]13C(=O)C4=C(O3)C(=C(C=C4OC)OC)Cl)OCC5=CC=CC=C52	FMNIQJRXZRGRIR-QVQLBTGDSA-N	(2S,3'R)-7-chloro-4,6-dimethoxy-3'-methylspiro[1-benzofuran-2,4'-3,6-dihydro-2H-benzo[c]chromene]-1',3-dione
118254145	(3'R)-7-chloro-4,6-dimethoxy-3'-methylspiro[1-benzofuran-2,4'-3,6-dihydro-2H-benzo[c]chromene]-1',3-dione	426.8	C23H19ClO6	C[C@@H]1CC(=O)C2=C(C13C(=O)C4=C(O3)C(=C(C=C4OC)OC)Cl)OCC5=CC=CC=C52	FMNIQJRXZRGRIR-YBSXLYEGSA-N	(3'R)-7-chloro-4,6-dimethoxy-3'-methylspiro[1-benzofuran-2,4'-3,6-dihydro-2H-benzo[c]chromene]-1',3-dione
118254151	(2S,2'R,6'R)-7-chloro-2'-(3-fluorophenyl)-4,6-dimethoxy-6'-methylspiro[1-benzofuran-2,5'-2,3,6,7-tetrahydro-1-benzofuran]-3,4'-dione	458.9	C24H20ClFO6	C[C@@H]1CC2=C(C[C@@H](O2)C3=CC(=CC=C3)F)C(=O)[C@]14C(=O)C5=C(O4)C(=C(C=C5OC)OC)Cl	KRQCKXHAVOUJBB-XPUXWNRCSA-N	(2S,2'R,6'R)-7-chloro-2'-(3-fluorophenyl)-4,6-dimethoxy-6'-methylspiro[1-benzofuran-2,5'-2,3,6,7-tetrahydro-1-benzofuran]-3,4'-dione
118254179	(2S,5'R)-3'-(1-benzofuran-2-yl)-7-chloro-4,6-dimethoxy-5'-methylspiro[1-benzofuran-2,4'-cyclohex-2-ene]-1',3-dione	438.9	C24H19ClO6	C[C@@H]1CC(=O)C=C([C@]12C(=O)C3=C(O2)C(=C(C=C3OC)OC)Cl)C4=CC5=CC=CC=C5O4	HEKGTKWQYGRVIK-YYUOZPCZSA-N	(2S,5'R)-3'-(1-benzofuran-2-yl)-7-chloro-4,6-dimethoxy-5'-methylspiro[1-benzofuran-2,4'-cyclohex-2-ene]-1',3-dione
118254182	(2S,2'R,6'R)-7-chloro-2'-(2-hydroxyethyl)-4,6-dimethoxy-6'-methyl-2'-phenylspiro[1-benzofuran-2,7'-5,6-dihydro-3H-1-benzofuran]-3,4'-dione	484.9	C26H25ClO7	C[C@@H]1CC(=O)C2=C([C@]13C(=O)C4=C(O3)C(=C(C=C4OC)OC)Cl)O[C@](C2)(CCO)C5=CC=CC=C5	NWIRMVAINQIMGM-DDHLINGLSA-N	(2S,2'R,6'R)-7-chloro-2'-(2-hydroxyethyl)-4,6-dimethoxy-6'-methyl-2'-phenylspiro[1-benzofuran-2,7'-5,6-dihydro-3H-1-benzofuran]-3,4'-dione
118254190	(2S,7'R)-7-chloro-2'-ethoxy-4,6-dimethoxy-7'-methylspiro[1-benzofuran-2,8'-3,4,6,7-tetrahydro-2H-chromene]-3,5'-dione	422.9	C21H23ClO7	CCOC1CCC2=C(O1)[C@@]3([C@@H](CC2=O)C)C(=O)C4=C(O3)C(=C(C=C4OC)OC)Cl	YJCHRBGEDNSUQQ-MOCAZDAOSA-N	(2S,7'R)-7-chloro-2'-ethoxy-4,6-dimethoxy-7'-methylspiro[1-benzofuran-2,8'-3,4,6,7-tetrahydro-2H-chromene]-3,5'-dione
118254213	(2S,2'S,6'R)-7-chloro-2'-(4-hydroxybutyl)-4,6-dimethoxy-6'-methyl-2'-phenylspiro[1-benzofuran-2,7'-5,6-dihydro-3H-1-benzofuran]-3,4'-dione	513	C28H29ClO7	C[C@@H]1CC(=O)C2=C([C@]13C(=O)C4=C(O3)C(=C(C=C4OC)OC)Cl)O[C@](C2)(CCCCO)C5=CC=CC=C5	LSVDGMZEAWHEEV-KCUQYIBQSA-N	(2S,2'S,6'R)-7-chloro-2'-(4-hydroxybutyl)-4,6-dimethoxy-6'-methyl-2'-phenylspiro[1-benzofuran-2,7'-5,6-dihydro-3H-1-benzofuran]-3,4'-dione
118254214	(2S,2'S,6'R)-7-chloro-2'-(3-fluorophenyl)-4,6-dimethoxy-6'-methylspiro[1-benzofuran-2,5'-2,3,6,7-tetrahydro-1-benzofuran]-3,4'-dione	458.9	C24H20ClFO6	C[C@@H]1CC2=C(C[C@H](O2)C3=CC(=CC=C3)F)C(=O)[C@]14C(=O)C5=C(O4)C(=C(C=C5OC)OC)Cl	KRQCKXHAVOUJBB-GBDDZHJPSA-N	(2S,2'S,6'R)-7-chloro-2'-(3-fluorophenyl)-4,6-dimethoxy-6'-methylspiro[1-benzofuran-2,5'-2,3,6,7-tetrahydro-1-benzofuran]-3,4'-dione
118254216	(2S,2'R,6'R)-7-chloro-4,6-dimethoxy-6'-methyl-2'-phenylspiro[1-benzofuran-2,5'-2,3,6,7-tetrahydro-1-benzofuran]-3,4'-dione	440.9	C24H21ClO6	C[C@@H]1CC2=C(C[C@@H](O2)C3=CC=CC=C3)C(=O)[C@]14C(=O)C5=C(O4)C(=C(C=C5OC)OC)Cl	VIDAZTLROWUZBN-VQGQKXPLSA-N	(2S,2'R,6'R)-7-chloro-4,6-dimethoxy-6'-methyl-2'-phenylspiro[1-benzofuran-2,5'-2,3,6,7-tetrahydro-1-benzofuran]-3,4'-dione
118254219	(2S,5'R)-7-chloro-4,6-dimethoxy-5'-methyl-3'-phenylspiro[1-benzofuran-2,4'-cyclohex-2-ene]-1',3-dione	398.8	C22H19ClO5	C[C@@H]1CC(=O)C=C([C@]12C(=O)C3=C(O2)C(=C(C=C3OC)OC)Cl)C4=CC=CC=C4	JQTUXNNXKOJMON-IPQOISQHSA-N	(2S,5'R)-7-chloro-4,6-dimethoxy-5'-methyl-3'-phenylspiro[1-benzofuran-2,4'-cyclohex-2-ene]-1',3-dione
118254227	(2S,2'S,6'R)-7-chloro-2'-(2-hydroxyethyl)-4,6-dimethoxy-6'-methyl-2'-phenylspiro[1-benzofuran-2,7'-5,6-dihydro-3H-1-benzofuran]-3,4'-dione	484.9	C26H25ClO7	C[C@@H]1CC(=O)C2=C([C@]13C(=O)C4=C(O3)C(=C(C=C4OC)OC)Cl)O[C@@](C2)(CCO)C5=CC=CC=C5	NWIRMVAINQIMGM-GIALVMGZSA-N	(2S,2'S,6'R)-7-chloro-2'-(2-hydroxyethyl)-4,6-dimethoxy-6'-methyl-2'-phenylspiro[1-benzofuran-2,7'-5,6-dihydro-3H-1-benzofuran]-3,4'-dione
118254232	(2S,2'S,6'R)-7-chloro-2'-(4-fluorophenyl)-4,6-dimethoxy-6'-methylspiro[1-benzofuran-2,7'-2,3,5,6-tetrahydro-1-benzofuran]-3,4'-dione	458.9	C24H20ClFO6	C[C@@H]1CC(=O)C2=C([C@]13C(=O)C4=C(O3)C(=C(C=C4OC)OC)Cl)O[C@@H](C2)C5=CC=C(C=C5)F	WZNNJKBLGNGLNN-LWPWGXQRSA-N	(2S,2'S,6'R)-7-chloro-2'-(4-fluorophenyl)-4,6-dimethoxy-6'-methylspiro[1-benzofuran-2,7'-2,3,5,6-tetrahydro-1-benzofuran]-3,4'-dione
118254246	2-[(2S,2'S,6'R)-7-chloro-4,6-dimethoxy-6'-methyl-3,4'-dioxo-2'-phenylspiro[1-benzofuran-2,7'-5,6-dihydro-3H-1-benzofuran]-2'-yl]ethyl acetate	527	C28H27ClO8	C[C@@H]1CC(=O)C2=C([C@]13C(=O)C4=C(O3)C(=C(C=C4OC)OC)Cl)O[C@@](C2)(CCOC(=O)C)C5=CC=CC=C5	ANCNSUXIBIXEJP-GKCNSXBISA-N	2-[(2S,2'S,6'R)-7-chloro-4,6-dimethoxy-6'-methyl-3,4'-dioxo-2'-phenylspiro[1-benzofuran-2,7'-5,6-dihydro-3H-1-benzofuran]-2'-yl]ethyl acetate
118263228	7-chloro-4,6-dimethoxy-7'-methylspiro[1-benzofuran-2,8'-3,4,6,7-tetrahydro-2H-chromene]-3,5'-dione	378.8	C19H19ClO6	CC1CC(=O)C2=C(C13C(=O)C4=C(O3)C(=C(C=C4OC)OC)Cl)OCCC2	DLNRWZFGKUEZHU-UHFFFAOYSA-N	7-chloro-4,6-dimethoxy-7'-methylspiro[1-benzofuran-2,8'-3,4,6,7-tetrahydro-2H-chromene]-3,5'-dione
118263231	(5R,6R)-7'-chloro-4',6'-dimethoxy-5-methylspiro[1,2,3,3a,4,5,7,7a-octahydroindene-6,2'-1-benzofuran]-3'-one	350.8	C19H23ClO4	C[C@@H]1CC2CCCC2C[C@]13C(=O)C4=C(O3)C(=C(C=C4OC)OC)Cl	PHNNETUPRDTOIR-DHCVUUPGSA-N	(5R,6R)-7'-chloro-4',6'-dimethoxy-5-methylspiro[1,2,3,3a,4,5,7,7a-octahydroindene-6,2'-1-benzofuran]-3'-one
118263233	7-Chloro-4,6-dimethoxy-2',6'-dimethyl-4'-methylidenespiro[1-benzofuran-2,7'-2,3,5,6-tetrahydro-1-benzofuran]-3-one	376.8	C20H21ClO5	CC1CC(=C)C2=C(C13C(=O)C4=C(O3)C(=C(C=C4OC)OC)Cl)OC(C2)C	POPGPSAYYDXQIC-UHFFFAOYSA-N	7-chloro-4,6-dimethoxy-2',6'-dimethyl-4'-methylidenespiro[1-benzofuran-2,7'-2,3,5,6-tetrahydro-1-benzofuran]-3-one
118263237	(2R,6'R)-7-chloro-4,6-dimethoxy-2',3',3',6'-tetramethylspiro[1-benzofuran-2,5'-2,4,6,7-tetrahydro-1-benzofuran]-3-one	392.9	C21H25ClO5	C[C@@H]1CC2=C(C[C@]13C(=O)C4=C(O3)C(=C(C=C4OC)OC)Cl)C(C(O2)C)(C)C	VRUBSDCXYHUPLC-OBNWYKQXSA-N	(2R,6'R)-7-chloro-4,6-dimethoxy-2',3',3',6'-tetramethylspiro[1-benzofuran-2,5'-2,4,6,7-tetrahydro-1-benzofuran]-3-one
118263241	(2R,7'R)-7-chloro-4,6-dimethoxy-2',3',3',4',4',7'-hexamethylspiro[1-benzofuran-2,6'-2,5,7,8-tetrahydrochromene]-3-one	435	C24H31ClO5	C[C@@H]1CC2=C(C[C@]13C(=O)C4=C(O3)C(=C(C=C4OC)OC)Cl)C(C(C(O2)C)(C)C)(C)C	QBJOTFHIRJQNGA-VLXISTMHSA-N	(2R,7'R)-7-chloro-4,6-dimethoxy-2',3',3',4',4',7'-hexamethylspiro[1-benzofuran-2,6'-2,5,7,8-tetrahydrochromene]-3-one
118263242	(2S,3'R)-7-chloro-4,6-dimethoxy-3'-methylspiro[1-benzofuran-2,2'-7-oxabicyclo[4.1.0]heptane]-3-one	324.75	C16H17ClO5	C[C@@H]1CCC2C([C@]13C(=O)C4=C(O3)C(=C(C=C4OC)OC)Cl)O2	LEZBPTVMGKKMGI-NQPIVPOISA-N	(2S,3'R)-7-chloro-4,6-dimethoxy-3'-methylspiro[1-benzofuran-2,2'-7-oxabicyclo[4.1.0]heptane]-3-one
118263243	(2S,5'R)-7-chloro-3'-hydroxy-4-methoxy-5',6-dimethylspiro[1-benzofuran-2,4'-cyclohex-2-ene]-1',3-dione	322.74	C16H15ClO5	C[C@@H]1CC(=O)C=C([C@]12C(=O)C3=C(C=C(C(=C3O2)Cl)C)OC)O	SYJOTZCQSMXMTL-BCTVWOGZSA-N	(2S,5'R)-7-chloro-3'-hydroxy-4-methoxy-5',6-dimethylspiro[1-benzofuran-2,4'-cyclohex-2-ene]-1',3-dione
118263244	(2S,6'R)-7-chloro-2'-(2-hydroxyethyl)-4,6-dimethoxy-6'-methyl-2'-phenylspiro[1-benzofuran-2,7'-5,6-dihydro-3H-1-benzofuran]-3,4'-dione	484.9	C26H25ClO7	C[C@@H]1CC(=O)C2=C([C@]13C(=O)C4=C(O3)C(=C(C=C4OC)OC)Cl)OC(C2)(CCO)C5=CC=CC=C5	NWIRMVAINQIMGM-GBJQPFTRSA-N	(2S,6'R)-7-chloro-2'-(2-hydroxyethyl)-4,6-dimethoxy-6'-methyl-2'-phenylspiro[1-benzofuran-2,7'-5,6-dihydro-3H-1-benzofuran]-3,4'-dione
118263245	(2R,6'R)-7-chloro-4,6-dimethoxy-2',3',6'-trimethylspiro[1-benzofuran-2,5'-6,7-dihydro-4H-1-benzofuran]-3-one	376.8	C20H21ClO5	C[C@@H]1CC2=C(C[C@]13C(=O)C4=C(O3)C(=C(C=C4OC)OC)Cl)C(=C(O2)C)C	ZVUMXICZSFOIPY-GSDQLPOLSA-N	(2R,6'R)-7-chloro-4,6-dimethoxy-2',3',6'-trimethylspiro[1-benzofuran-2,5'-6,7-dihydro-4H-1-benzofuran]-3-one
118263246	2-[(2S,6'R)-7-chloro-4,6-dimethoxy-6'-methyl-3,4'-dioxo-2'-phenylspiro[1-benzofuran-2,7'-5,6-dihydro-3H-1-benzofuran]-2'-yl]ethyl acetate	527	C28H27ClO8	C[C@@H]1CC(=O)C2=C([C@]13C(=O)C4=C(O3)C(=C(C=C4OC)OC)Cl)OC(C2)(CCOC(=O)C)C5=CC=CC=C5	ANCNSUXIBIXEJP-CQYIRWNQSA-N	2-[(2S,6'R)-7-chloro-4,6-dimethoxy-6'-methyl-3,4'-dioxo-2'-phenylspiro[1-benzofuran-2,7'-5,6-dihydro-3H-1-benzofuran]-2'-yl]ethyl acetate
118263247	(2S,6'R)-2'-(2-bromoethyl)-7-chloro-4,6-dimethoxy-6'-methyl-2'-phenylspiro[1-benzofuran-2,7'-5,6-dihydro-3H-1-benzofuran]-3,4'-dione	547.8	C26H24BrClO6	C[C@@H]1CC(=O)C2=C([C@]13C(=O)C4=C(O3)C(=C(C=C4OC)OC)Cl)OC(C2)(CCBr)C5=CC=CC=C5	XRAJEIHWOSFQFE-GBJQPFTRSA-N	(2S,6'R)-2'-(2-bromoethyl)-7-chloro-4,6-dimethoxy-6'-methyl-2'-phenylspiro[1-benzofuran-2,7'-5,6-dihydro-3H-1-benzofuran]-3,4'-dione
118263248	(2R,2'Z,5'R)-7-chloro-2'-(dimethylaminomethylidene)-4,6-dimethoxy-5'-methylspiro[1-benzofuran-2,4'-cyclohexane]-1',3,3'-trione	393.8	C19H20ClNO6	C[C@@H]1CC(=O)/C(=C/N(C)C)/C(=O)[C@]12C(=O)C3=C(O2)C(=C(C=C3OC)OC)Cl	QJHBJICXBXSQCO-RMHWBROQSA-N	(2R,2'Z,5'R)-7-chloro-2'-(dimethylaminomethylidene)-4,6-dimethoxy-5'-methylspiro[1-benzofuran-2,4'-cyclohexane]-1',3,3'-trione
118263250	(2S,2'S,7'R)-7-chloro-2'-ethoxy-4,6-dimethoxy-7'-methylspiro[1-benzofuran-2,6'-3,4,7,8-tetrahydro-2H-chromene]-3,5'-dione	422.9	C21H23ClO7	CCO[C@@H]1CCC2=C(O1)C[C@H]([C@]3(C2=O)C(=O)C4=C(O3)C(=C(C=C4OC)OC)Cl)C	GPCYBFHQQMQASF-JHBIKAPFSA-N	(2S,2'S,7'R)-7-chloro-2'-ethoxy-4,6-dimethoxy-7'-methylspiro[1-benzofuran-2,6'-3,4,7,8-tetrahydro-2H-chromene]-3,5'-dione
118263251	(2S,2'R,7'R)-7-chloro-2'-ethoxy-4,6-dimethoxy-7'-methylspiro[1-benzofuran-2,8'-3,4,6,7-tetrahydro-2H-chromene]-3,5'-dione	422.9	C21H23ClO7	CCO[C@H]1CCC2=C(O1)[C@@]3([C@@H](CC2=O)C)C(=O)C4=C(O3)C(=C(C=C4OC)OC)Cl	YJCHRBGEDNSUQQ-HESLQRHSSA-N	(2S,2'R,7'R)-7-chloro-2'-ethoxy-4,6-dimethoxy-7'-methylspiro[1-benzofuran-2,8'-3,4,6,7-tetrahydro-2H-chromene]-3,5'-dione
118263264	(2S,3'R)-7-chloro-4,6-dimethoxy-3',7',7',8',8'-pentamethylspiro[1-benzofuran-2,2'-bicyclo[4.2.0]oct-1(6)-ene]-3-one	390.9	C22H27ClO4	C[C@@H]1CCC2=C([C@]13C(=O)C4=C(O3)C(=C(C=C4OC)OC)Cl)C(C2(C)C)(C)C	WWUQSDKOTOBFKK-XFNZEKPQSA-N	(2S,3'R)-7-chloro-4,6-dimethoxy-3',7',7',8',8'-pentamethylspiro[1-benzofuran-2,2'-bicyclo[4.2.0]oct-1(6)-ene]-3-one
118263268	(2S,2'R,4'R)-7-chloro-2'-hydroxy-4,6-dimethoxy-4',7',7',8',8'-pentamethylspiro[1-benzofuran-2,3'-bicyclo[4.2.0]oct-1(6)-ene]-3-one	406.9	C22H27ClO5	C[C@@H]1CC2=C([C@H]([C@]13C(=O)C4=C(O3)C(=C(C=C4OC)OC)Cl)O)C(C2(C)C)(C)C	OIMIMLZPNBDETQ-KTWOQNQHSA-N	(2S,2'R,4'R)-7-chloro-2'-hydroxy-4,6-dimethoxy-4',7',7',8',8'-pentamethylspiro[1-benzofuran-2,3'-bicyclo[4.2.0]oct-1(6)-ene]-3-one
118263269	(2S,2'S,4'R)-7-chloro-2'-hydroxy-4,6-dimethoxy-4',7',7',8',8'-pentamethylspiro[1-benzofuran-2,3'-bicyclo[4.2.0]oct-1(6)-ene]-3-one	406.9	C22H27ClO5	C[C@@H]1CC2=C([C@@H]([C@]13C(=O)C4=C(O3)C(=C(C=C4OC)OC)Cl)O)C(C2(C)C)(C)C	OIMIMLZPNBDETQ-MQIWIDOFSA-N	(2S,2'S,4'R)-7-chloro-2'-hydroxy-4,6-dimethoxy-4',7',7',8',8'-pentamethylspiro[1-benzofuran-2,3'-bicyclo[4.2.0]oct-1(6)-ene]-3-one
118263272	(2S,4'R)-7-chloro-4,6-dimethoxy-4',7',7',8',8'-pentamethylspiro[1-benzofuran-2,5'-bicyclo[4.2.0]oct-1(6)-ene]-2',3-dione	404.9	C22H25ClO5	C[C@@H]1CC(=O)C2=C([C@]13C(=O)C4=C(O3)C(=C(C=C4OC)OC)Cl)C(C2(C)C)(C)C	RPJSMKRTULJUQZ-STFLBKPXSA-N	(2S,4'R)-7-chloro-4,6-dimethoxy-4',7',7',8',8'-pentamethylspiro[1-benzofuran-2,5'-bicyclo[4.2.0]oct-1(6)-ene]-2',3-dione
118263273	(2R,4'R)-7-chloro-4,6,6'-trimethoxy-4'-methylspiro[1-benzofuran-2,5'-7-oxabicyclo[4.1.0]heptane]-2',3-dione	368.8	C17H17ClO7	C[C@@H]1CC(=O)C2C([C@]13C(=O)C4=C(O3)C(=C(C=C4OC)OC)Cl)(O2)OC	QJTATUPVXUBZGY-DNWRVCMESA-N	(2R,4'R)-7-chloro-4,6,6'-trimethoxy-4'-methylspiro[1-benzofuran-2,5'-7-oxabicyclo[4.1.0]heptane]-2',3-dione
118267042	(2S,4'R)-7-chloro-2'-ethyl-4,6-dimethoxy-1',4'-dimethylspiro[1-benzofuran-2,3'-cyclohexene]-3-one	350.8	C19H23ClO4	CCC1=C(CC[C@H]([C@@]12C(=O)C3=C(O2)C(=C(C=C3OC)OC)Cl)C)C	QKCROPUPLSGIEZ-WYRIXSBYSA-N	(2S,4'R)-7-chloro-2'-ethyl-4,6-dimethoxy-1',4'-dimethylspiro[1-benzofuran-2,3'-cyclohexene]-3-one
118267045	(2S,3'S,5'R)-7-chloro-3'-hydroxy-4,6-dimethoxy-1',2',5'-trimethylspiro[1-benzofuran-2,4'-cyclohexene]-3-one	352.8	C18H21ClO5	C[C@@H]1CC(=C([C@@H]([C@]12C(=O)C3=C(O2)C(=C(C=C3OC)OC)Cl)O)C)C	PSENPSFDIHKSKA-COJQNKITSA-N	(2S,3'S,5'R)-7-chloro-3'-hydroxy-4,6-dimethoxy-1',2',5'-trimethylspiro[1-benzofuran-2,4'-cyclohexene]-3-one
118267046	(2S,5'R)-7-chloro-4,6-dimethoxy-2',3',5'-trimethylspiro[1-benzofuran-2,4'-cyclohex-2-ene]-1',3-dione	350.8	C18H19ClO5	C[C@@H]1CC(=O)C(=C([C@]12C(=O)C3=C(O2)C(=C(C=C3OC)OC)Cl)C)C	BAJBPNFZUFIPDM-CVJBHZAOSA-N	(2S,5'R)-7-chloro-4,6-dimethoxy-2',3',5'-trimethylspiro[1-benzofuran-2,4'-cyclohex-2-ene]-1',3-dione
118267049	(2S,4'R,6'S)-7-chloro-6'-hydroxy-4,6-dimethoxy-1',2',4'-trimethylspiro[1-benzofuran-2,3'-cyclohexene]-3-one	352.8	C18H21ClO5	C[C@@H]1C[C@@H](C(=C([C@]12C(=O)C3=C(O2)C(=C(C=C3OC)OC)Cl)C)C)O	JDYAOAZXBUBQRW-URUSGVHJSA-N	(2S,4'R,6'S)-7-chloro-6'-hydroxy-4,6-dimethoxy-1',2',4'-trimethylspiro[1-benzofuran-2,3'-cyclohexene]-3-one
118267052	(2S,4'R,6'R)-7-chloro-6'-hydroxy-4,6-dimethoxy-1',2',4'-trimethylspiro[1-benzofuran-2,3'-cyclohexene]-3-one	352.8	C18H21ClO5	C[C@@H]1C[C@H](C(=C([C@]12C(=O)C3=C(O2)C(=C(C=C3OC)OC)Cl)C)C)O	JDYAOAZXBUBQRW-BNYJVKCBSA-N	(2S,4'R,6'R)-7-chloro-6'-hydroxy-4,6-dimethoxy-1',2',4'-trimethylspiro[1-benzofuran-2,3'-cyclohexene]-3-one
118267073	7-Chloro-4,6-dimethoxy-2',6'-dimethylspiro[1-benzofuran-2,7'-2,3,5,6-tetrahydro-1-benzofuran]-3,4'-dione	378.8	C19H19ClO6	CC1CC(=O)C2=C(C13C(=O)C4=C(O3)C(=C(C=C4OC)OC)Cl)OC(C2)C	GWIDRZDIDPPDDH-UHFFFAOYSA-N	7-chloro-4,6-dimethoxy-2',6'-dimethylspiro[1-benzofuran-2,7'-2,3,5,6-tetrahydro-1-benzofuran]-3,4'-dione
118267096	(2S,5'R)-7-chloro-4,6-dimethoxy-3',5'-dimethyl-2'-[(1Z)-3-methylbuta-1,3-dienyl]spiro[1-benzofuran-2,6'-cyclohex-2-ene]-1',3-dione	402.9	C22H23ClO5	C[C@@H]1CC(=C(C(=O)[C@]12C(=O)C3=C(O2)C(=C(C=C3OC)OC)Cl)/C=C\\C(=C)C)C	YJNVPFINEYLGHH-RXNIRYNWSA-N	(2S,5'R)-7-chloro-4,6-dimethoxy-3',5'-dimethyl-2'-[(1Z)-3-methylbuta-1,3-dienyl]spiro[1-benzofuran-2,6'-cyclohex-2-ene]-1',3-dione
118267097	(2S,3'R,5'R)-7-chloro-3'-hydroxy-4,6-dimethoxy-1',2',5'-trimethylspiro[1-benzofuran-2,4'-cyclohexene]-3-one	352.8	C18H21ClO5	C[C@@H]1CC(=C([C@H]([C@]12C(=O)C3=C(O2)C(=C(C=C3OC)OC)Cl)O)C)C	PSENPSFDIHKSKA-AWBWRCJSSA-N	(2S,3'R,5'R)-7-chloro-3'-hydroxy-4,6-dimethoxy-1',2',5'-trimethylspiro[1-benzofuran-2,4'-cyclohexene]-3-one
118267131	(3'R)-7-chloro-4,6-dimethoxy-3',5'-dimethylspiro[1-benzofuran-2,4'-cyclohexane]-1',3-dione	338.8	C17H19ClO5	C[C@@H]1CC(=O)CC(C12C(=O)C3=C(O2)C(=C(C=C3OC)OC)Cl)C	SEJIULWQYHLORG-LOWPREMFSA-N	(3'R)-7-chloro-4,6-dimethoxy-3',5'-dimethylspiro[1-benzofuran-2,4'-cyclohexane]-1',3-dione
119091269	3(2H)-Benzofuranone, 7-chloro-4-ethoxy-6-methoxy-	242.65	C11H11ClO4	CCOC1=CC(=C(C2=C1C(=O)CO2)Cl)OC	PWOFVNUFGJITBL-UHFFFAOYSA-N	7-chloro-4-ethoxy-6-methoxy-1-benzofuran-3-one
122400007	(3R,6S)-3-Hydroxy-6-((2S,6'R)-3,4'-dioxo-6,2'-dimethoxy-7-chloro-6'-methylspiro[benzofuran-2(3H),1'-[2]cyclohexene]-4-yl)oxycyclohexene-1-carboxylic acid methyl ester	492.9	C24H25ClO9	C[C@@H]1CC(=O)C=C([C@]12C(=O)C3=C(O2)C(=C(C=C3O[C@H]4CC[C@H](C=C4C(=O)OC)O)OC)Cl)OC	CTYCFJIVJUKWEB-ILJMNOAHSA-N	methyl (3R,6S)-6-[(2S,5'R)-7-chloro-1',6-dimethoxy-5'-methyl-3,3'-dioxospiro[1-benzofuran-2,6'-cyclohexene]-4-yl]oxy-3-hydroxycyclohexene-1-carboxylate
122400012	(5S,6R)-5-Hydroxy-6-((2S,6'R)-3,4'-dioxo-6,2'-dimethoxy-7-chloro-6'-methylspiro[benzofuran-2(3H),1'-[2]cyclohexene]-4-yl)oxycyclohexene-1-carboxylic acid methyl ester	492.9	C24H25ClO9	C[C@@H]1CC(=O)C=C([C@]12C(=O)C3=C(O2)C(=C(C=C3O[C@H]4[C@H](CCC=C4C(=O)OC)O)OC)Cl)OC	VWUSWDXGMUNICL-BSZGDSHMSA-N	methyl (5S,6R)-6-[(2S,5'R)-7-chloro-1',6-dimethoxy-5'-methyl-3,3'-dioxospiro[1-benzofuran-2,6'-cyclohexene]-4-yl]oxy-5-hydroxycyclohexene-1-carboxylate
123214764	3'-Butan-2-yl-7-chloro-2'-(2-ethylphenyl)-4,6-dimethoxy-5'-methylspiro[1-benzofuran-2,4'-cyclohex-2-ene]-1',3-dione	483	C28H31ClO5	CCC1=CC=CC=C1C2=C(C3(C(CC2=O)C)C(=O)C4=C(O3)C(=C(C=C4OC)OC)Cl)C(C)CC	IPRSOXWZZGHFTE-UHFFFAOYSA-N	3'-butan-2-yl-7-chloro-2'-(2-ethylphenyl)-4,6-dimethoxy-5'-methylspiro[1-benzofuran-2,4'-cyclohex-2-ene]-1',3-dione
123282608	7-chloro-2'-ethoxy-4,6-dimethoxy-7'-methylspiro[1-benzofuran-2,6'-3,4,7,8-tetrahydro-2H-chromene]-3,5'-dione	422.9	C21H23ClO7	CCOC1CCC2=C(O1)CC(C3(C2=O)C(=O)C4=C(O3)C(=C(C=C4OC)OC)Cl)C	GPCYBFHQQMQASF-UHFFFAOYSA-N	7-chloro-2'-ethoxy-4,6-dimethoxy-7'-methylspiro[1-benzofuran-2,6'-3,4,7,8-tetrahydro-2H-chromene]-3,5'-dione
123293391	2-(7-chloro-4,6-dimethoxy-6'-methyl-3,4'-dioxo-2'-phenylspiro[1-benzofuran-2,7'-5,6-dihydro-3H-1-benzofuran]-2'-yl)ethyl acetate	527	C28H27ClO8	CC1CC(=O)C2=C(C13C(=O)C4=C(O3)C(=C(C=C4OC)OC)Cl)OC(C2)(CCOC(=O)C)C5=CC=CC=C5	ANCNSUXIBIXEJP-UHFFFAOYSA-N	2-(7-chloro-4,6-dimethoxy-6'-methyl-3,4'-dioxo-2'-phenylspiro[1-benzofuran-2,7'-5,6-dihydro-3H-1-benzofuran]-2'-yl)ethyl acetate
123350254	7-Chloro-4,6-dimethoxy-4'-methylspiro[1-benzofuran-2,5'-7-oxabicyclo[4.1.0]heptane]-2',3-dione	338.74	C16H15ClO6	CC1CC(=O)C2C(C13C(=O)C4=C(O3)C(=C(C=C4OC)OC)Cl)O2	VTKGZGMULYQHPJ-UHFFFAOYSA-N	7-chloro-4,6-dimethoxy-4'-methylspiro[1-benzofuran-2,5'-7-oxabicyclo[4.1.0]heptane]-2',3-dione
123361815	7-Chloro-5'-hydroxy-4,6-dimethoxy-3'-methylspiro[1-benzofuran-2,2'-cyclohexane]-1',3-dione	340.75	C16H17ClO6	CC1CC(CC(=O)C12C(=O)C3=C(O2)C(=C(C=C3OC)OC)Cl)O	PFEJCOHFVHTICT-UHFFFAOYSA-N	7-chloro-5'-hydroxy-4,6-dimethoxy-3'-methylspiro[1-benzofuran-2,2'-cyclohexane]-1',3-dione
123396595	1',7-Dichloro-4,6-dimethoxy-5'-methyl-3'-methylidenespiro[1-benzofuran-2,6'-cyclohexene]-3-one	355.2	C17H16Cl2O4	CC1CC(=C)C=C(C12C(=O)C3=C(O2)C(=C(C=C3OC)OC)Cl)Cl	DZLLBZUZIRSLMP-UHFFFAOYSA-N	1',7-dichloro-4,6-dimethoxy-5'-methyl-3'-methylidenespiro[1-benzofuran-2,6'-cyclohexene]-3-one
123704177	2'-(2-bromoethyl)-7-chloro-4,6-dimethoxy-6'-methyl-2'-phenylspiro[1-benzofuran-2,7'-5,6-dihydro-3H-1-benzofuran]-3,4'-dione	547.8	C26H24BrClO6	CC1CC(=O)C2=C(C13C(=O)C4=C(O3)C(=C(C=C4OC)OC)Cl)OC(C2)(CCBr)C5=CC=CC=C5	XRAJEIHWOSFQFE-UHFFFAOYSA-N	2'-(2-bromoethyl)-7-chloro-4,6-dimethoxy-6'-methyl-2'-phenylspiro[1-benzofuran-2,7'-5,6-dihydro-3H-1-benzofuran]-3,4'-dione
123825667	(2S,5'R)-7-chloro-3'-imino-4,6-dimethoxy-5'-methylspiro[1-benzofuran-2,4'-cyclohexane]-1',3-dione	337.75	C16H16ClNO5	C[C@@H]1CC(=O)CC(=N)[C@]12C(=O)C3=C(O2)C(=C(C=C3OC)OC)Cl	HQMOIESTNIQZKG-QZTNRIJFSA-N	(2S,5'R)-7-chloro-3'-imino-4,6-dimethoxy-5'-methylspiro[1-benzofuran-2,4'-cyclohexane]-1',3-dione
123836216	7-Chloro-4,6-dimethoxy-6'-methyl-3'-phenylspiro[1-benzofuran-2,5'-2,3,6,7-tetrahydro-1-benzofuran]-3,4'-dione	440.9	C24H21ClO6	CC1CC2=C(C(CO2)C3=CC=CC=C3)C(=O)C14C(=O)C5=C(O4)C(=C(C=C5OC)OC)Cl	AZQIJNBWYDEOCT-UHFFFAOYSA-N	7-chloro-4,6-dimethoxy-6'-methyl-3'-phenylspiro[1-benzofuran-2,5'-2,3,6,7-tetrahydro-1-benzofuran]-3,4'-dione
123846923	(2R,5'R)-7-chloro-2'-(dimethylaminomethylidene)-4,6-dimethoxy-5'-methylspiro[1-benzofuran-2,4'-cyclohexane]-1',3,3'-trione	393.8	C19H20ClNO6	C[C@@H]1CC(=O)C(=CN(C)C)C(=O)[C@]12C(=O)C3=C(O2)C(=C(C=C3OC)OC)Cl	QJHBJICXBXSQCO-HOGDKLEQSA-N	(2R,5'R)-7-chloro-2'-(dimethylaminomethylidene)-4,6-dimethoxy-5'-methylspiro[1-benzofuran-2,4'-cyclohexane]-1',3,3'-trione
123872201	7-Chloro-4,6,6'-trimethoxy-4'-methylspiro[1-benzofuran-2,5'-7-oxabicyclo[4.1.0]heptane]-2',3-dione	368.8	C17H17ClO7	CC1CC(=O)C2C(C13C(=O)C4=C(O3)C(=C(C=C4OC)OC)Cl)(O2)OC	QJTATUPVXUBZGY-UHFFFAOYSA-N	7-chloro-4,6,6'-trimethoxy-4'-methylspiro[1-benzofuran-2,5'-7-oxabicyclo[4.1.0]heptane]-2',3-dione
124024037	7-Chloro-3'-imino-4,6-dimethoxy-5'-methylspiro[1-benzofuran-2,4'-cyclohexane]-1',3-dione	337.75	C16H16ClNO5	CC1CC(=O)CC(=N)C12C(=O)C3=C(O2)C(=C(C=C3OC)OC)Cl	HQMOIESTNIQZKG-UHFFFAOYSA-N	7-chloro-3'-imino-4,6-dimethoxy-5'-methylspiro[1-benzofuran-2,4'-cyclohexane]-1',3-dione
124301775	(2S,5'S)-7-chloro-3',4,6-trimethoxy-5'-methylspiro[1-benzofuran-2,6'-cyclohex-2-ene]-1',3-dione	352.8	C17H17ClO6	C[C@H]1CC(=CC(=O)[C@]12C(=O)C3=C(O2)C(=C(C=C3OC)OC)Cl)OC	FFKRWPQQTGWKIH-QPFGOUBPSA-N	(2S,5'S)-7-chloro-3',4,6-trimethoxy-5'-methylspiro[1-benzofuran-2,6'-cyclohex-2-ene]-1',3-dione
124301776	(2R,5'R)-7-chloro-3',4,6-trimethoxy-5'-methylspiro[1-benzofuran-2,6'-cyclohex-2-ene]-1',3-dione	352.8	C17H17ClO6	C[C@@H]1CC(=CC(=O)[C@@]12C(=O)C3=C(O2)C(=C(C=C3OC)OC)Cl)OC	FFKRWPQQTGWKIH-CQLKUDPESA-N	(2R,5'R)-7-chloro-3',4,6-trimethoxy-5'-methylspiro[1-benzofuran-2,6'-cyclohex-2-ene]-1',3-dione
124307480	(2R,5'S)-7-chloro-6-hydroxy-3',4-dimethoxy-5'-methylspiro[1-benzofuran-2,4'-cyclohex-2-ene]-1',3-dione	338.74	C16H15ClO6	C[C@H]1CC(=O)C=C([C@@]12C(=O)C3=C(C=C(C(=C3O2)Cl)O)OC)OC	SYNGDIBHUPXIQA-HYORBCNSSA-N	(2R,5'S)-7-chloro-6-hydroxy-3',4-dimethoxy-5'-methylspiro[1-benzofuran-2,4'-cyclohex-2-ene]-1',3-dione
124397086	(2R,5'S)-7-chloro-4-hydroxy-3',6-dimethoxy-5'-methylspiro[1-benzofuran-2,4'-cyclohex-2-ene]-1',3-dione	338.74	C16H15ClO6	C[C@H]1CC(=O)C=C([C@@]12C(=O)C3=C(O2)C(=C(C=C3O)OC)Cl)OC	KTICLSBYPHKDMM-HYORBCNSSA-N	(2R,5'S)-7-chloro-4-hydroxy-3',6-dimethoxy-5'-methylspiro[1-benzofuran-2,4'-cyclohex-2-ene]-1',3-dione
125427757	methyl (3R)-3-[(2S,4'R)-7-chloro-2'-hydroxy-4,6-dimethoxy-4'-methyl-3,6'-dioxospiro[1-benzofuran-2,3'-cyclohexene]-1'-yl]-3-(4-methoxyphenyl)propanoate	530.9	C27H27ClO9	C[C@@H]1CC(=O)C(=C([C@]12C(=O)C3=C(O2)C(=C(C=C3OC)OC)Cl)O)[C@H](CC(=O)OC)C4=CC=C(C=C4)OC	FYAYJJJTMIRCBS-GZVCGHTCSA-N	methyl (3R)-3-[(2S,4'R)-7-chloro-2'-hydroxy-4,6-dimethoxy-4'-methyl-3,6'-dioxospiro[1-benzofuran-2,3'-cyclohexene]-1'-yl]-3-(4-methoxyphenyl)propanoate
125427758	methyl (3S)-3-[(2S,4'R)-7-chloro-2'-hydroxy-4,6-dimethoxy-4'-methyl-3,6'-dioxospiro[1-benzofuran-2,3'-cyclohexene]-1'-yl]-3-(4-methoxyphenyl)propanoate	530.9	C27H27ClO9	C[C@@H]1CC(=O)C(=C([C@]12C(=O)C3=C(O2)C(=C(C=C3OC)OC)Cl)O)[C@@H](CC(=O)OC)C4=CC=C(C=C4)OC	FYAYJJJTMIRCBS-HFAJPBBRSA-N	methyl (3S)-3-[(2S,4'R)-7-chloro-2'-hydroxy-4,6-dimethoxy-4'-methyl-3,6'-dioxospiro[1-benzofuran-2,3'-cyclohexene]-1'-yl]-3-(4-methoxyphenyl)propanoate
125428416	methyl (3R)-3-[(2S,4'R)-7-chloro-2'-hydroxy-4,6-dimethoxy-4'-methyl-3,6'-dioxospiro[1-benzofuran-2,3'-cyclohexene]-1'-yl]-4-methylpentanoate	466.9	C23H27ClO8	C[C@@H]1CC(=O)C(=C([C@]12C(=O)C3=C(O2)C(=C(C=C3OC)OC)Cl)O)[C@H](CC(=O)OC)C(C)C	JTNHPNWIIQPTMN-MNDBLIDSSA-N	methyl (3R)-3-[(2S,4'R)-7-chloro-2'-hydroxy-4,6-dimethoxy-4'-methyl-3,6'-dioxospiro[1-benzofuran-2,3'-cyclohexene]-1'-yl]-4-methylpentanoate
125428417	methyl (3S)-3-[(2S,4'R)-7-chloro-2'-hydroxy-4,6-dimethoxy-4'-methyl-3,6'-dioxospiro[1-benzofuran-2,3'-cyclohexene]-1'-yl]-4-methylpentanoate	466.9	C23H27ClO8	C[C@@H]1CC(=O)C(=C([C@]12C(=O)C3=C(O2)C(=C(C=C3OC)OC)Cl)O)[C@@H](CC(=O)OC)C(C)C	JTNHPNWIIQPTMN-WCBZVUCDSA-N	methyl (3S)-3-[(2S,4'R)-7-chloro-2'-hydroxy-4,6-dimethoxy-4'-methyl-3,6'-dioxospiro[1-benzofuran-2,3'-cyclohexene]-1'-yl]-4-methylpentanoate
125428702	methyl (3R)-3-[(2S,4'R)-7-chloro-2'-hydroxy-4,6-dimethoxy-4'-methyl-3,6'-dioxospiro[1-benzofuran-2,3'-cyclohexene]-1'-yl]-3-[4-(2-methylprop-2-enoxy)phenyl]propanoate	571	C30H31ClO9	C[C@@H]1CC(=O)C(=C([C@]12C(=O)C3=C(O2)C(=C(C=C3OC)OC)Cl)O)[C@H](CC(=O)OC)C4=CC=C(C=C4)OCC(=C)C	VTNQGPXXPSMFQK-LCUVTVSSSA-N	methyl (3R)-3-[(2S,4'R)-7-chloro-2'-hydroxy-4,6-dimethoxy-4'-methyl-3,6'-dioxospiro[1-benzofuran-2,3'-cyclohexene]-1'-yl]-3-[4-(2-methylprop-2-enoxy)phenyl]propanoate
125428703	methyl (3S)-3-[(2S,4'R)-7-chloro-2'-hydroxy-4,6-dimethoxy-4'-methyl-3,6'-dioxospiro[1-benzofuran-2,3'-cyclohexene]-1'-yl]-3-[4-(2-methylprop-2-enoxy)phenyl]propanoate	571	C30H31ClO9	C[C@@H]1CC(=O)C(=C([C@]12C(=O)C3=C(O2)C(=C(C=C3OC)OC)Cl)O)[C@@H](CC(=O)OC)C4=CC=C(C=C4)OCC(=C)C	VTNQGPXXPSMFQK-NQNGNYMJSA-N	methyl (3S)-3-[(2S,4'R)-7-chloro-2'-hydroxy-4,6-dimethoxy-4'-methyl-3,6'-dioxospiro[1-benzofuran-2,3'-cyclohexene]-1'-yl]-3-[4-(2-methylprop-2-enoxy)phenyl]propanoate
125428749	methyl (3R)-3-[(2S,4'R)-7-chloro-2'-hydroxy-4,6-dimethoxy-4'-methyl-3,6'-dioxospiro[1-benzofuran-2,3'-cyclohexene]-1'-yl]-3-phenylpropanoate	500.9	C26H25ClO8	C[C@@H]1CC(=O)C(=C([C@]12C(=O)C3=C(O2)C(=C(C=C3OC)OC)Cl)O)[C@H](CC(=O)OC)C4=CC=CC=C4	XAZOOWUNZASUEN-NGKZDAFWSA-N	methyl (3R)-3-[(2S,4'R)-7-chloro-2'-hydroxy-4,6-dimethoxy-4'-methyl-3,6'-dioxospiro[1-benzofuran-2,3'-cyclohexene]-1'-yl]-3-phenylpropanoate
125428750	methyl (3S)-3-[(2S,4'R)-7-chloro-2'-hydroxy-4,6-dimethoxy-4'-methyl-3,6'-dioxospiro[1-benzofuran-2,3'-cyclohexene]-1'-yl]-3-phenylpropanoate	500.9	C26H25ClO8	C[C@@H]1CC(=O)C(=C([C@]12C(=O)C3=C(O2)C(=C(C=C3OC)OC)Cl)O)[C@@H](CC(=O)OC)C4=CC=CC=C4	XAZOOWUNZASUEN-YBKWPNDMSA-N	methyl (3S)-3-[(2S,4'R)-7-chloro-2'-hydroxy-4,6-dimethoxy-4'-methyl-3,6'-dioxospiro[1-benzofuran-2,3'-cyclohexene]-1'-yl]-3-phenylpropanoate
125429126	methyl (3R)-3-[(2S,4'R)-7-chloro-2'-hydroxy-4,6-dimethoxy-4'-methyl-3,6'-dioxospiro[1-benzofuran-2,3'-cyclohexene]-1'-yl]-3-(3-chloro-4-hydroxyphenyl)propanoate	551.4	C26H24Cl2O9	C[C@@H]1CC(=O)C(=C([C@]12C(=O)C3=C(O2)C(=C(C=C3OC)OC)Cl)O)[C@H](CC(=O)OC)C4=CC(=C(C=C4)O)Cl	LLJBSQNWTISYOX-BAKZXQNTSA-N	methyl (3R)-3-[(2S,4'R)-7-chloro-2'-hydroxy-4,6-dimethoxy-4'-methyl-3,6'-dioxospiro[1-benzofuran-2,3'-cyclohexene]-1'-yl]-3-(3-chloro-4-hydroxyphenyl)propanoate
125429127	methyl (3S)-3-[(2S,4'R)-7-chloro-2'-hydroxy-4,6-dimethoxy-4'-methyl-3,6'-dioxospiro[1-benzofuran-2,3'-cyclohexene]-1'-yl]-3-(3-chloro-4-hydroxyphenyl)propanoate	551.4	C26H24Cl2O9	C[C@@H]1CC(=O)C(=C([C@]12C(=O)C3=C(O2)C(=C(C=C3OC)OC)Cl)O)[C@@H](CC(=O)OC)C4=CC(=C(C=C4)O)Cl	LLJBSQNWTISYOX-NJAKMQSKSA-N	methyl (3S)-3-[(2S,4'R)-7-chloro-2'-hydroxy-4,6-dimethoxy-4'-methyl-3,6'-dioxospiro[1-benzofuran-2,3'-cyclohexene]-1'-yl]-3-(3-chloro-4-hydroxyphenyl)propanoate
125429177	methyl (3R)-3-[(2S,4'R)-7-chloro-2'-hydroxy-4,6-dimethoxy-4'-methyl-3,6'-dioxospiro[1-benzofuran-2,3'-cyclohexene]-1'-yl]-3-(4-hydroxyphenyl)propanoate	516.9	C26H25ClO9	C[C@@H]1CC(=O)C(=C([C@]12C(=O)C3=C(O2)C(=C(C=C3OC)OC)Cl)O)[C@H](CC(=O)OC)C4=CC=C(C=C4)O	NKVPKNXDKUJVKY-PLQDTCIUSA-N	methyl (3R)-3-[(2S,4'R)-7-chloro-2'-hydroxy-4,6-dimethoxy-4'-methyl-3,6'-dioxospiro[1-benzofuran-2,3'-cyclohexene]-1'-yl]-3-(4-hydroxyphenyl)propanoate
125429178	methyl (3S)-3-[(2S,4'R)-7-chloro-2'-hydroxy-4,6-dimethoxy-4'-methyl-3,6'-dioxospiro[1-benzofuran-2,3'-cyclohexene]-1'-yl]-3-(4-hydroxyphenyl)propanoate	516.9	C26H25ClO9	C[C@@H]1CC(=O)C(=C([C@]12C(=O)C3=C(O2)C(=C(C=C3OC)OC)Cl)O)[C@@H](CC(=O)OC)C4=CC=C(C=C4)O	NKVPKNXDKUJVKY-PTEODDATSA-N	methyl (3S)-3-[(2S,4'R)-7-chloro-2'-hydroxy-4,6-dimethoxy-4'-methyl-3,6'-dioxospiro[1-benzofuran-2,3'-cyclohexene]-1'-yl]-3-(4-hydroxyphenyl)propanoate
125429419	methyl (3S)-3-[(2S,4'R)-7-chloro-2'-hydroxy-4,6-dimethoxy-4'-methyl-3,6'-dioxospiro[1-benzofuran-2,3'-cyclohexene]-1'-yl]-3-(2,4-dimethoxyphenyl)propanoate	561	C28H29ClO10	C[C@@H]1CC(=O)C(=C([C@]12C(=O)C3=C(O2)C(=C(C=C3OC)OC)Cl)O)[C@@H](CC(=O)OC)C4=C(C=C(C=C4)OC)OC	YBQAXLGNISJVRY-HNWGMOHISA-N	methyl (3S)-3-[(2S,4'R)-7-chloro-2'-hydroxy-4,6-dimethoxy-4'-methyl-3,6'-dioxospiro[1-benzofuran-2,3'-cyclohexene]-1'-yl]-3-(2,4-dimethoxyphenyl)propanoate
125429420	methyl (3R)-3-[(2S,4'R)-7-chloro-2'-hydroxy-4,6-dimethoxy-4'-methyl-3,6'-dioxospiro[1-benzofuran-2,3'-cyclohexene]-1'-yl]-3-(2,4-dimethoxyphenyl)propanoate	561	C28H29ClO10	C[C@@H]1CC(=O)C(=C([C@]12C(=O)C3=C(O2)C(=C(C=C3OC)OC)Cl)O)[C@H](CC(=O)OC)C4=C(C=C(C=C4)OC)OC	YBQAXLGNISJVRY-NGTFFEPXSA-N	methyl (3R)-3-[(2S,4'R)-7-chloro-2'-hydroxy-4,6-dimethoxy-4'-methyl-3,6'-dioxospiro[1-benzofuran-2,3'-cyclohexene]-1'-yl]-3-(2,4-dimethoxyphenyl)propanoate
125429426	2-[4-[(1S)-1-[(2S,4'R)-7-chloro-2'-hydroxy-4,6-dimethoxy-4'-methyl-3,6'-dioxospiro[1-benzofuran-2,3'-cyclohexene]-1'-yl]-3-methoxy-3-oxopropyl]phenoxy]acetic acid	575	C28H27ClO11	C[C@@H]1CC(=O)C(=C([C@]12C(=O)C3=C(O2)C(=C(C=C3OC)OC)Cl)O)[C@@H](CC(=O)OC)C4=CC=C(C=C4)OCC(=O)O	YJBUVAAIEUQIAG-HNWGMOHISA-N	2-[4-[(1S)-1-[(2S,4'R)-7-chloro-2'-hydroxy-4,6-dimethoxy-4'-methyl-3,6'-dioxospiro[1-benzofuran-2,3'-cyclohexene]-1'-yl]-3-methoxy-3-oxopropyl]phenoxy]acetic acid
125429427	2-[4-[(1R)-1-[(2S,4'R)-7-chloro-2'-hydroxy-4,6-dimethoxy-4'-methyl-3,6'-dioxospiro[1-benzofuran-2,3'-cyclohexene]-1'-yl]-3-methoxy-3-oxopropyl]phenoxy]acetic acid	575	C28H27ClO11	C[C@@H]1CC(=O)C(=C([C@]12C(=O)C3=C(O2)C(=C(C=C3OC)OC)Cl)O)[C@H](CC(=O)OC)C4=CC=C(C=C4)OCC(=O)O	YJBUVAAIEUQIAG-NGTFFEPXSA-N	2-[4-[(1R)-1-[(2S,4'R)-7-chloro-2'-hydroxy-4,6-dimethoxy-4'-methyl-3,6'-dioxospiro[1-benzofuran-2,3'-cyclohexene]-1'-yl]-3-methoxy-3-oxopropyl]phenoxy]acetic acid
125429497	methyl (3S)-3-[(2S,4'R)-7-chloro-2'-hydroxy-4,6-dimethoxy-4'-methyl-3,6'-dioxospiro[1-benzofuran-2,3'-cyclohexene]-1'-yl]-3-(4-oxochromen-3-yl)propanoate	569	C29H25ClO10	C[C@@H]1CC(=O)C(=C([C@]12C(=O)C3=C(O2)C(=C(C=C3OC)OC)Cl)O)[C@@H](CC(=O)OC)C4=COC5=CC=CC=C5C4=O	AVMUDZUEOSDYHX-BOWJYTNOSA-N	methyl (3S)-3-[(2S,4'R)-7-chloro-2'-hydroxy-4,6-dimethoxy-4'-methyl-3,6'-dioxospiro[1-benzofuran-2,3'-cyclohexene]-1'-yl]-3-(4-oxochromen-3-yl)propanoate
125429498	methyl (3R)-3-[(2S,4'R)-7-chloro-2'-hydroxy-4,6-dimethoxy-4'-methyl-3,6'-dioxospiro[1-benzofuran-2,3'-cyclohexene]-1'-yl]-3-(4-oxochromen-3-yl)propanoate	569	C29H25ClO10	C[C@@H]1CC(=O)C(=C([C@]12C(=O)C3=C(O2)C(=C(C=C3OC)OC)Cl)O)[C@H](CC(=O)OC)C4=COC5=CC=CC=C5C4=O	AVMUDZUEOSDYHX-IWZUZTOOSA-N	methyl (3R)-3-[(2S,4'R)-7-chloro-2'-hydroxy-4,6-dimethoxy-4'-methyl-3,6'-dioxospiro[1-benzofuran-2,3'-cyclohexene]-1'-yl]-3-(4-oxochromen-3-yl)propanoate
125429633	methyl (3R)-3-[(2S,4'R)-7-chloro-2'-hydroxy-4,6-dimethoxy-4'-methyl-3,6'-dioxospiro[1-benzofuran-2,3'-cyclohexene]-1'-yl]-3-(3-hydroxyphenyl)propanoate	516.9	C26H25ClO9	C[C@@H]1CC(=O)C(=C([C@]12C(=O)C3=C(O2)C(=C(C=C3OC)OC)Cl)O)[C@H](CC(=O)OC)C4=CC(=CC=C4)O	GXEFTNRGHRTTHR-PLQDTCIUSA-N	methyl (3R)-3-[(2S,4'R)-7-chloro-2'-hydroxy-4,6-dimethoxy-4'-methyl-3,6'-dioxospiro[1-benzofuran-2,3'-cyclohexene]-1'-yl]-3-(3-hydroxyphenyl)propanoate
125429634	methyl (3S)-3-[(2S,4'R)-7-chloro-2'-hydroxy-4,6-dimethoxy-4'-methyl-3,6'-dioxospiro[1-benzofuran-2,3'-cyclohexene]-1'-yl]-3-(3-hydroxyphenyl)propanoate	516.9	C26H25ClO9	C[C@@H]1CC(=O)C(=C([C@]12C(=O)C3=C(O2)C(=C(C=C3OC)OC)Cl)O)[C@@H](CC(=O)OC)C4=CC(=CC=C4)O	GXEFTNRGHRTTHR-PTEODDATSA-N	methyl (3S)-3-[(2S,4'R)-7-chloro-2'-hydroxy-4,6-dimethoxy-4'-methyl-3,6'-dioxospiro[1-benzofuran-2,3'-cyclohexene]-1'-yl]-3-(3-hydroxyphenyl)propanoate
125429840	methyl (3R)-3-[(2S,4'R)-7-chloro-2'-hydroxy-4,6-dimethoxy-4'-methyl-3,6'-dioxospiro[1-benzofuran-2,3'-cyclohexene]-1'-yl]-3-(3,4,5-trifluorophenyl)propanoate	554.9	C26H22ClF3O8	C[C@@H]1CC(=O)C(=C([C@]12C(=O)C3=C(O2)C(=C(C=C3OC)OC)Cl)O)[C@H](CC(=O)OC)C4=CC(=C(C(=C4)F)F)F	OSSUCCJRRXSNLX-HMLMRQBDSA-N	methyl (3R)-3-[(2S,4'R)-7-chloro-2'-hydroxy-4,6-dimethoxy-4'-methyl-3,6'-dioxospiro[1-benzofuran-2,3'-cyclohexene]-1'-yl]-3-(3,4,5-trifluorophenyl)propanoate
125429841	methyl (3S)-3-[(2S,4'R)-7-chloro-2'-hydroxy-4,6-dimethoxy-4'-methyl-3,6'-dioxospiro[1-benzofuran-2,3'-cyclohexene]-1'-yl]-3-(3,4,5-trifluorophenyl)propanoate	554.9	C26H22ClF3O8	C[C@@H]1CC(=O)C(=C([C@]12C(=O)C3=C(O2)C(=C(C=C3OC)OC)Cl)O)[C@@H](CC(=O)OC)C4=CC(=C(C(=C4)F)F)F	OSSUCCJRRXSNLX-YYQJGWKRSA-N	methyl (3S)-3-[(2S,4'R)-7-chloro-2'-hydroxy-4,6-dimethoxy-4'-methyl-3,6'-dioxospiro[1-benzofuran-2,3'-cyclohexene]-1'-yl]-3-(3,4,5-trifluorophenyl)propanoate
125429985	methyl (3R)-3-[(2S,4'R)-7-chloro-2'-hydroxy-4,6-dimethoxy-4'-methyl-3,6'-dioxospiro[1-benzofuran-2,3'-cyclohexene]-1'-yl]-5-methylhexanoate	480.9	C24H29ClO8	C[C@@H]1CC(=O)C(=C([C@]12C(=O)C3=C(O2)C(=C(C=C3OC)OC)Cl)O)[C@H](CC(C)C)CC(=O)OC	UYPWDNDWNCKTGW-FPJCUDJDSA-N	methyl (3R)-3-[(2S,4'R)-7-chloro-2'-hydroxy-4,6-dimethoxy-4'-methyl-3,6'-dioxospiro[1-benzofuran-2,3'-cyclohexene]-1'-yl]-5-methylhexanoate
125429986	methyl (3S)-3-[(2S,4'R)-7-chloro-2'-hydroxy-4,6-dimethoxy-4'-methyl-3,6'-dioxospiro[1-benzofuran-2,3'-cyclohexene]-1'-yl]-5-methylhexanoate	480.9	C24H29ClO8	C[C@@H]1CC(=O)C(=C([C@]12C(=O)C3=C(O2)C(=C(C=C3OC)OC)Cl)O)[C@@H](CC(C)C)CC(=O)OC	UYPWDNDWNCKTGW-VXMWWYGOSA-N	methyl (3S)-3-[(2S,4'R)-7-chloro-2'-hydroxy-4,6-dimethoxy-4'-methyl-3,6'-dioxospiro[1-benzofuran-2,3'-cyclohexene]-1'-yl]-5-methylhexanoate
127053184	(2S,5'R)-7-chloro-4-(difluoromethoxy)-6-methoxy-5'-methyl-3'-phenylmethoxyspiro[1-benzofuran-2,4'-cyclohex-2-ene]-1',3-dione	464.8	C23H19ClF2O6	C[C@@H]1CC(=O)C=C([C@]12C(=O)C3=C(O2)C(=C(C=C3OC(F)F)OC)Cl)OCC4=CC=CC=C4	DJFXKBZUDHKKLF-SPSFWMDKSA-N	(2S,5'R)-7-chloro-4-(difluoromethoxy)-6-methoxy-5'-methyl-3'-phenylmethoxyspiro[1-benzofuran-2,4'-cyclohex-2-ene]-1',3-dione
127053185	(2S,5'R)-7-chloro-6-(difluoromethoxy)-4-methoxy-5'-methyl-3'-phenylmethoxyspiro[1-benzofuran-2,4'-cyclohex-2-ene]-1',3-dione	464.8	C23H19ClF2O6	C[C@@H]1CC(=O)C=C([C@]12C(=O)C3=C(O2)C(=C(C=C3OC)OC(F)F)Cl)OCC4=CC=CC=C4	SDUIWSJBUCNSPA-SPSFWMDKSA-N	(2S,5'R)-7-chloro-6-(difluoromethoxy)-4-methoxy-5'-methyl-3'-phenylmethoxyspiro[1-benzofuran-2,4'-cyclohex-2-ene]-1',3-dione
127253416	methyl 3-[(2S,4'R)-7-chloro-2'-hydroxy-4,6-dimethoxy-4'-methyl-3,6'-dioxospiro[1-benzofuran-2,3'-cyclohexene]-1'-yl]-3-(4-octoxyphenyl)propanoate	629.1	C34H41ClO9	CCCCCCCCOC1=CC=C(C=C1)C(CC(=O)OC)C2=C([C@@]3([C@@H](CC2=O)C)C(=O)C4=C(O3)C(=C(C=C4OC)OC)Cl)O	IXWFFASHPMUBGO-UDJSRGECSA-N	methyl 3-[(2S,4'R)-7-chloro-2'-hydroxy-4,6-dimethoxy-4'-methyl-3,6'-dioxospiro[1-benzofuran-2,3'-cyclohexene]-1'-yl]-3-(4-octoxyphenyl)propanoate
129010273	(2R)-7-chloro-3',4,6-trimethoxy-5'-methylspiro[1-benzofuran-2,4'-cyclohex-2-ene]-1',3-dione	352.8	C17H17ClO6	CC1CC(=O)C=C([C@@]12C(=O)C3=C(O2)C(=C(C=C3OC)OC)Cl)OC	DDUHZTYCFQRHIY-KCHMSYDNSA-N	(2R)-7-chloro-3',4,6-trimethoxy-5'-methylspiro[1-benzofuran-2,4'-cyclohex-2-ene]-1',3-dione
129603773	methyl (3R)-3-[(2S,4'R)-7-chloro-2'-hydroxy-4,6-dimethoxy-4'-methyl-3,6'-dioxospiro[1-benzofuran-2,3'-cyclohexene]-1'-yl]-3-(4-octoxyphenyl)propanoate	629.1	C34H41ClO9	CCCCCCCCOC1=CC=C(C=C1)[C@@H](CC(=O)OC)C2=C([C@@]3([C@@H](CC2=O)C)C(=O)C4=C(O3)C(=C(C=C4OC)OC)Cl)O	IXWFFASHPMUBGO-OTHANADMSA-N	methyl (3R)-3-[(2S,4'R)-7-chloro-2'-hydroxy-4,6-dimethoxy-4'-methyl-3,6'-dioxospiro[1-benzofuran-2,3'-cyclohexene]-1'-yl]-3-(4-octoxyphenyl)propanoate
129603774	methyl (3S)-3-[(2S,4'R)-7-chloro-2'-hydroxy-4,6-dimethoxy-4'-methyl-3,6'-dioxospiro[1-benzofuran-2,3'-cyclohexene]-1'-yl]-3-(4-octoxyphenyl)propanoate	629.1	C34H41ClO9	CCCCCCCCOC1=CC=C(C=C1)[C@H](CC(=O)OC)C2=C([C@@]3([C@@H](CC2=O)C)C(=O)C4=C(O3)C(=C(C=C4OC)OC)Cl)O	IXWFFASHPMUBGO-VSWMQDILSA-N	methyl (3S)-3-[(2S,4'R)-7-chloro-2'-hydroxy-4,6-dimethoxy-4'-methyl-3,6'-dioxospiro[1-benzofuran-2,3'-cyclohexene]-1'-yl]-3-(4-octoxyphenyl)propanoate
129894712	methyl 3-[(2S,4'R)-7-chloro-2'-hydroxy-4,6-dimethoxy-4'-methyl-3,6'-dioxospiro[1-benzofuran-2,3'-cyclohexene]-1'-yl]-3-(4-methoxyphenyl)propanoate	530.9	C27H27ClO9	C[C@@H]1CC(=O)C(=C([C@]12C(=O)C3=C(O2)C(=C(C=C3OC)OC)Cl)O)C(CC(=O)OC)C4=CC=C(C=C4)OC	FYAYJJJTMIRCBS-XSMRWMOWSA-N	methyl 3-[(2S,4'R)-7-chloro-2'-hydroxy-4,6-dimethoxy-4'-methyl-3,6'-dioxospiro[1-benzofuran-2,3'-cyclohexene]-1'-yl]-3-(4-methoxyphenyl)propanoate
129894893	methyl 3-[(2S,4'R)-7-chloro-2'-hydroxy-4,6-dimethoxy-4'-methyl-3,6'-dioxospiro[1-benzofuran-2,3'-cyclohexene]-1'-yl]-3-phenylpropanoate	500.9	C26H25ClO8	C[C@@H]1CC(=O)C(=C([C@]12C(=O)C3=C(O2)C(=C(C=C3OC)OC)Cl)O)C(CC(=O)OC)C4=CC=CC=C4	XAZOOWUNZASUEN-XOBNBHGTSA-N	methyl 3-[(2S,4'R)-7-chloro-2'-hydroxy-4,6-dimethoxy-4'-methyl-3,6'-dioxospiro[1-benzofuran-2,3'-cyclohexene]-1'-yl]-3-phenylpropanoate
129895030	methyl 3-[(2S,4'R)-7-chloro-2'-hydroxy-4,6-dimethoxy-4'-methyl-3,6'-dioxospiro[1-benzofuran-2,3'-cyclohexene]-1'-yl]-4-methylpentanoate	466.9	C23H27ClO8	C[C@@H]1CC(=O)C(=C([C@]12C(=O)C3=C(O2)C(=C(C=C3OC)OC)Cl)O)C(CC(=O)OC)C(C)C	JTNHPNWIIQPTMN-HBJWOKFRSA-N	methyl 3-[(2S,4'R)-7-chloro-2'-hydroxy-4,6-dimethoxy-4'-methyl-3,6'-dioxospiro[1-benzofuran-2,3'-cyclohexene]-1'-yl]-4-methylpentanoate
129895087	methyl 3-[(2S,4'R)-7-chloro-2'-hydroxy-4,6-dimethoxy-4'-methyl-3,6'-dioxospiro[1-benzofuran-2,3'-cyclohexene]-1'-yl]-3-[4-(2-methylprop-2-enoxy)phenyl]propanoate	571	C30H31ClO9	C[C@@H]1CC(=O)C(=C([C@]12C(=O)C3=C(O2)C(=C(C=C3OC)OC)Cl)O)C(CC(=O)OC)C4=CC=C(C=C4)OCC(=C)C	VTNQGPXXPSMFQK-XEGLVFTNSA-N	methyl 3-[(2S,4'R)-7-chloro-2'-hydroxy-4,6-dimethoxy-4'-methyl-3,6'-dioxospiro[1-benzofuran-2,3'-cyclohexene]-1'-yl]-3-[4-(2-methylprop-2-enoxy)phenyl]propanoate
129895176	methyl 3-[(2S,4'R)-7-chloro-2'-hydroxy-4,6-dimethoxy-4'-methyl-3,6'-dioxospiro[1-benzofuran-2,3'-cyclohexene]-1'-yl]-3-(4-hydroxyphenyl)propanoate	516.9	C26H25ClO9	C[C@@H]1CC(=O)C(=C([C@]12C(=O)C3=C(O2)C(=C(C=C3OC)OC)Cl)O)C(CC(=O)OC)C4=CC=C(C=C4)O	NKVPKNXDKUJVKY-UKCGDORRSA-N	methyl 3-[(2S,4'R)-7-chloro-2'-hydroxy-4,6-dimethoxy-4'-methyl-3,6'-dioxospiro[1-benzofuran-2,3'-cyclohexene]-1'-yl]-3-(4-hydroxyphenyl)propanoate
129895205	2-[4-[1-[(2S,4'R)-7-chloro-2'-hydroxy-4,6-dimethoxy-4'-methyl-3,6'-dioxospiro[1-benzofuran-2,3'-cyclohexene]-1'-yl]-3-methoxy-3-oxopropyl]phenoxy]acetic acid	575	C28H27ClO11	C[C@@H]1CC(=O)C(=C([C@]12C(=O)C3=C(O2)C(=C(C=C3OC)OC)Cl)O)C(CC(=O)OC)C4=CC=C(C=C4)OCC(=O)O	YJBUVAAIEUQIAG-JYJCHFTJSA-N	2-[4-[1-[(2S,4'R)-7-chloro-2'-hydroxy-4,6-dimethoxy-4'-methyl-3,6'-dioxospiro[1-benzofuran-2,3'-cyclohexene]-1'-yl]-3-methoxy-3-oxopropyl]phenoxy]acetic acid
129895222	methyl 3-[(2S,4'R)-7-chloro-2'-hydroxy-4,6-dimethoxy-4'-methyl-3,6'-dioxospiro[1-benzofuran-2,3'-cyclohexene]-1'-yl]-3-(3-chloro-4-hydroxyphenyl)propanoate	551.4	C26H24Cl2O9	C[C@@H]1CC(=O)C(=C([C@]12C(=O)C3=C(O2)C(=C(C=C3OC)OC)Cl)O)C(CC(=O)OC)C4=CC(=C(C=C4)O)Cl	LLJBSQNWTISYOX-LZLPAYPLSA-N	methyl 3-[(2S,4'R)-7-chloro-2'-hydroxy-4,6-dimethoxy-4'-methyl-3,6'-dioxospiro[1-benzofuran-2,3'-cyclohexene]-1'-yl]-3-(3-chloro-4-hydroxyphenyl)propanoate
129895373	methyl 3-[(2S,4'R)-7-chloro-2'-hydroxy-4,6-dimethoxy-4'-methyl-3,6'-dioxospiro[1-benzofuran-2,3'-cyclohexene]-1'-yl]-3-(2,4-dimethoxyphenyl)propanoate	561	C28H29ClO10	C[C@@H]1CC(=O)C(=C([C@]12C(=O)C3=C(O2)C(=C(C=C3OC)OC)Cl)O)C(CC(=O)OC)C4=C(C=C(C=C4)OC)OC	YBQAXLGNISJVRY-JYJCHFTJSA-N	methyl 3-[(2S,4'R)-7-chloro-2'-hydroxy-4,6-dimethoxy-4'-methyl-3,6'-dioxospiro[1-benzofuran-2,3'-cyclohexene]-1'-yl]-3-(2,4-dimethoxyphenyl)propanoate
129895443	methyl 3-[(2S,4'R)-7-chloro-2'-hydroxy-4,6-dimethoxy-4'-methyl-3,6'-dioxospiro[1-benzofuran-2,3'-cyclohexene]-1'-yl]-5-methylhexanoate	480.9	C24H29ClO8	C[C@@H]1CC(=O)C(=C([C@]12C(=O)C3=C(O2)C(=C(C=C3OC)OC)Cl)O)C(CC(C)C)CC(=O)OC	UYPWDNDWNCKTGW-WHKIWBFYSA-N	methyl 3-[(2S,4'R)-7-chloro-2'-hydroxy-4,6-dimethoxy-4'-methyl-3,6'-dioxospiro[1-benzofuran-2,3'-cyclohexene]-1'-yl]-5-methylhexanoate
129895451	methyl 3-[(2S,4'R)-7-chloro-2'-hydroxy-4,6-dimethoxy-4'-methyl-3,6'-dioxospiro[1-benzofuran-2,3'-cyclohexene]-1'-yl]-3-(3-hydroxyphenyl)propanoate	516.9	C26H25ClO9	C[C@@H]1CC(=O)C(=C([C@]12C(=O)C3=C(O2)C(=C(C=C3OC)OC)Cl)O)C(CC(=O)OC)C4=CC(=CC=C4)O	GXEFTNRGHRTTHR-UKCGDORRSA-N	methyl 3-[(2S,4'R)-7-chloro-2'-hydroxy-4,6-dimethoxy-4'-methyl-3,6'-dioxospiro[1-benzofuran-2,3'-cyclohexene]-1'-yl]-3-(3-hydroxyphenyl)propanoate
129895481	methyl 3-[(2S,4'R)-7-chloro-2'-hydroxy-4,6-dimethoxy-4'-methyl-3,6'-dioxospiro[1-benzofuran-2,3'-cyclohexene]-1'-yl]-3-(4-oxochromen-3-yl)propanoate	569	C29H25ClO10	C[C@@H]1CC(=O)C(=C([C@]12C(=O)C3=C(O2)C(=C(C=C3OC)OC)Cl)O)C(CC(=O)OC)C4=COC5=CC=CC=C5C4=O	AVMUDZUEOSDYHX-LGLDPFCDSA-N	methyl 3-[(2S,4'R)-7-chloro-2'-hydroxy-4,6-dimethoxy-4'-methyl-3,6'-dioxospiro[1-benzofuran-2,3'-cyclohexene]-1'-yl]-3-(4-oxochromen-3-yl)propanoate
129895618	methyl 3-[(2S,4'R)-7-chloro-2'-hydroxy-4,6-dimethoxy-4'-methyl-3,6'-dioxospiro[1-benzofuran-2,3'-cyclohexene]-1'-yl]-3-(3,4,5-trifluorophenyl)propanoate	554.9	C26H22ClF3O8	C[C@@H]1CC(=O)C(=C([C@]12C(=O)C3=C(O2)C(=C(C=C3OC)OC)Cl)O)C(CC(=O)OC)C4=CC(=C(C(=C4)F)F)F	OSSUCCJRRXSNLX-RVUKPFSISA-N	methyl 3-[(2S,4'R)-7-chloro-2'-hydroxy-4,6-dimethoxy-4'-methyl-3,6'-dioxospiro[1-benzofuran-2,3'-cyclohexene]-1'-yl]-3-(3,4,5-trifluorophenyl)propanoate
131770040	6-Methyl-griseofulvin	336.8	C17H17ClO5	C[C@@H]1CC(=O)C=C([C@]12C(=O)C3=C(C=C(C(=C3O2)Cl)C)OC)OC	QNPINWFXONNRKM-XLFHBGCDSA-N	(2S,5'R)-7-chloro-3',4-dimethoxy-5',6-dimethylspiro[1-benzofuran-2,4'-cyclohex-2-ene]-1',3-dione
131964492	(2S,5'R)-7-chloro-6-hydroxy-3'-methoxy-5'-methyl-4-[2-(oxan-2-yloxy)ethoxy]spiro[1-benzofuran-2,4'-cyclohex-2-ene]-1',3-dione	452.9	C22H25ClO8	C[C@@H]1CC(=O)C=C([C@]12C(=O)C3=C(C=C(C(=C3O2)Cl)O)OCCOC4CCCCO4)OC	CYLZUGVLYNQLNC-ZHXVUIMYSA-N	(2S,5'R)-7-chloro-6-hydroxy-3'-methoxy-5'-methyl-4-[2-(oxan-2-yloxy)ethoxy]spiro[1-benzofuran-2,4'-cyclohex-2-ene]-1',3-dione
131964498	(2S,5'R)-7-chloro-3',4-dimethoxy-6-(2-methoxyethoxy)-5'-methylspiro[1-benzofuran-2,4'-cyclohex-2-ene]-1',3-dione	396.8	C19H21ClO7	C[C@@H]1CC(=O)C=C([C@]12C(=O)C3=C(O2)C(=C(C=C3OC)OCCOC)Cl)OC	UCRGOQCZRBGFRC-DGIBIBHMSA-N	(2S,5'R)-7-chloro-3',4-dimethoxy-6-(2-methoxyethoxy)-5'-methylspiro[1-benzofuran-2,4'-cyclohex-2-ene]-1',3-dione
131964505	(2S,5'R)-7-chloro-6-(2-hydroxyethoxy)-3',4-dimethoxy-5'-methylspiro[1-benzofuran-2,4'-cyclohex-2-ene]-1',3-dione	382.8	C18H19ClO7	C[C@@H]1CC(=O)C=C([C@]12C(=O)C3=C(O2)C(=C(C=C3OC)OCCO)Cl)OC	GTXGPAGDKOAHMP-LZVRBXCZSA-N	(2S,5'R)-7-chloro-6-(2-hydroxyethoxy)-3',4-dimethoxy-5'-methylspiro[1-benzofuran-2,4'-cyclohex-2-ene]-1',3-dione
131964506	(2S,5'R)-7-chloro-3',6-dimethoxy-5'-methyl-4-[2-(oxan-2-yloxy)ethoxy]spiro[1-benzofuran-2,4'-cyclohex-2-ene]-1',3-dione	466.9	C23H27ClO8	C[C@@H]1CC(=O)C=C([C@]12C(=O)C3=C(O2)C(=C(C=C3OCCOC4CCCCO4)OC)Cl)OC	NLIILKXVWZQVFD-HHQVVCBYSA-N	(2S,5'R)-7-chloro-3',6-dimethoxy-5'-methyl-4-[2-(oxan-2-yloxy)ethoxy]spiro[1-benzofuran-2,4'-cyclohex-2-ene]-1',3-dione
131975182	(5'R)-7-chloro-3',6-dimethoxy-5'-methyl-4-[2-(oxan-2-yloxy)ethoxy]spiro[1-benzofuran-2,4'-cyclohex-2-ene]-1',3-dione	466.9	C23H27ClO8	C[C@@H]1CC(=O)C=C(C12C(=O)C3=C(O2)C(=C(C=C3OCCOC4CCCCO4)OC)Cl)OC	NLIILKXVWZQVFD-RJVDIYDSSA-N	(5'R)-7-chloro-3',6-dimethoxy-5'-methyl-4-[2-(oxan-2-yloxy)ethoxy]spiro[1-benzofuran-2,4'-cyclohex-2-ene]-1',3-dione
131975184	(2S,5'R)-7-chloro-3'-hydroxy-6-methoxy-5'-methyl-4-[2-(oxan-2-yloxy)ethoxy]spiro[1-benzofuran-2,4'-cyclohex-2-ene]-1',3-dione	452.9	C22H25ClO8	C[C@@H]1CC(=O)C=C([C@]12C(=O)C3=C(O2)C(=C(C=C3OCCOC4CCCCO4)OC)Cl)O	VZOLVAADIDKSGK-ZHXVUIMYSA-N	(2S,5'R)-7-chloro-3'-hydroxy-6-methoxy-5'-methyl-4-[2-(oxan-2-yloxy)ethoxy]spiro[1-benzofuran-2,4'-cyclohex-2-ene]-1',3-dione
132285856	methyl 3-(7-chloro-4'-hydroxy-4,6-dimethoxy-6'-methyl-2',3-dioxo-3H-spiro[1-benzofuran-2,1'-cyclohex[3]en]-3'-yl)-3-[4-(octyloxy)phenyl]propanoate	629.1	C34H41ClO9	CCCCCCCCOC1=CC=C(C=C1)C(CC(=O)OC)C2=C(C3(C(CC2=O)C)C(=O)C4=C(O3)C(=C(C=C4OC)OC)Cl)O	IXWFFASHPMUBGO-UHFFFAOYSA-N	methyl 3-(7-chloro-2'-hydroxy-4,6-dimethoxy-4'-methyl-3,6'-dioxospiro[1-benzofuran-2,3'-cyclohexene]-1'-yl)-3-(4-octoxyphenyl)propanoate
132285940	methyl 3-(7-chloro-4'-hydroxy-4,6-dimethoxy-6'-methyl-2',3-dioxo-3H-spiro[1-benzofuran-2,1'-cyclohex[3]en]-3'-yl)-3-(4-methoxyphenyl)propanoate	530.9	C27H27ClO9	CC1CC(=O)C(=C(C12C(=O)C3=C(O2)C(=C(C=C3OC)OC)Cl)O)C(CC(=O)OC)C4=CC=C(C=C4)OC	FYAYJJJTMIRCBS-UHFFFAOYSA-N	methyl 3-(7-chloro-2'-hydroxy-4,6-dimethoxy-4'-methyl-3,6'-dioxospiro[1-benzofuran-2,3'-cyclohexene]-1'-yl)-3-(4-methoxyphenyl)propanoate
132285949	methyl 3-(7-chloro-4'-hydroxy-4,6-dimethoxy-6'-methyl-2',3-dioxo-3H-spiro[1-benzofuran-2,1'-cyclohex[3]en]-3'-yl)-3-(4-hydroxyphenyl)propanoate	516.9	C26H25ClO9	CC1CC(=O)C(=C(C12C(=O)C3=C(O2)C(=C(C=C3OC)OC)Cl)O)C(CC(=O)OC)C4=CC=C(C=C4)O	NKVPKNXDKUJVKY-UHFFFAOYSA-N	methyl 3-(7-chloro-2'-hydroxy-4,6-dimethoxy-4'-methyl-3,6'-dioxospiro[1-benzofuran-2,3'-cyclohexene]-1'-yl)-3-(4-hydroxyphenyl)propanoate
132286067	methyl 3-(7-chloro-4'-hydroxy-4,6-dimethoxy-6'-methyl-2',3-dioxo-3H-spiro[1-benzofuran-2,1'-cyclohex[3]en]-3'-yl)-3-(3-hydroxyphenyl)propanoate	516.9	C26H25ClO9	CC1CC(=O)C(=C(C12C(=O)C3=C(O2)C(=C(C=C3OC)OC)Cl)O)C(CC(=O)OC)C4=CC(=CC=C4)O	GXEFTNRGHRTTHR-UHFFFAOYSA-N	methyl 3-(7-chloro-2'-hydroxy-4,6-dimethoxy-4'-methyl-3,6'-dioxospiro[1-benzofuran-2,3'-cyclohexene]-1'-yl)-3-(3-hydroxyphenyl)propanoate
132286090	methyl 3-(7-chloro-4'-hydroxy-4,6-dimethoxy-6'-methyl-2',3-dioxo-3H-spiro[1-benzofuran-2,1'-cyclohex[3]en]-3'-yl)-4-methylpentanoate	466.9	C23H27ClO8	CC1CC(=O)C(=C(C12C(=O)C3=C(O2)C(=C(C=C3OC)OC)Cl)O)C(CC(=O)OC)C(C)C	JTNHPNWIIQPTMN-UHFFFAOYSA-N	methyl 3-(7-chloro-2'-hydroxy-4,6-dimethoxy-4'-methyl-3,6'-dioxospiro[1-benzofuran-2,3'-cyclohexene]-1'-yl)-4-methylpentanoate
132286165	{4-[1-(7-chloro-4'-hydroxy-4,6-dimethoxy-6'-methyl-2',3-dioxo-3H-spiro[1-benzofuran-2,1'-cyclohex[3]en]-3'-yl)-3-methoxy-3-oxopropyl]phenoxy}acetic acid	575	C28H27ClO11	CC1CC(=O)C(=C(C12C(=O)C3=C(O2)C(=C(C=C3OC)OC)Cl)O)C(CC(=O)OC)C4=CC=C(C=C4)OCC(=O)O	YJBUVAAIEUQIAG-UHFFFAOYSA-N	2-[4-[1-(7-chloro-2'-hydroxy-4,6-dimethoxy-4'-methyl-3,6'-dioxospiro[1-benzofuran-2,3'-cyclohexene]-1'-yl)-3-methoxy-3-oxopropyl]phenoxy]acetic acid
132286322	methyl 3-(7-chloro-4'-hydroxy-4,6-dimethoxy-6'-methyl-2',3-dioxo-3H-spiro[1-benzofuran-2,1'-cyclohex[3]en]-3'-yl)-3-phenylpropanoate	500.9	C26H25ClO8	CC1CC(=O)C(=C(C12C(=O)C3=C(O2)C(=C(C=C3OC)OC)Cl)O)C(CC(=O)OC)C4=CC=CC=C4	XAZOOWUNZASUEN-UHFFFAOYSA-N	methyl 3-(7-chloro-2'-hydroxy-4,6-dimethoxy-4'-methyl-3,6'-dioxospiro[1-benzofuran-2,3'-cyclohexene]-1'-yl)-3-phenylpropanoate
132286340	methyl 3-(7-chloro-4'-hydroxy-4,6-dimethoxy-6'-methyl-2',3-dioxo-3H-spiro[1-benzofuran-2,1'-cyclohex[3]en]-3'-yl)-3-(2,4-dimethoxyphenyl)propanoate	561	C28H29ClO10	CC1CC(=O)C(=C(C12C(=O)C3=C(O2)C(=C(C=C3OC)OC)Cl)O)C(CC(=O)OC)C4=C(C=C(C=C4)OC)OC	YBQAXLGNISJVRY-UHFFFAOYSA-N	methyl 3-(7-chloro-2'-hydroxy-4,6-dimethoxy-4'-methyl-3,6'-dioxospiro[1-benzofuran-2,3'-cyclohexene]-1'-yl)-3-(2,4-dimethoxyphenyl)propanoate
132286359	methyl 3-(7-chloro-4'-hydroxy-4,6-dimethoxy-6'-methyl-2',3-dioxo-3H-spiro[1-benzofuran-2,1'-cyclohex[3]en]-3'-yl)-3-(3-chloro-4-hydroxyphenyl)propanoate	551.4	C26H24Cl2O9	CC1CC(=O)C(=C(C12C(=O)C3=C(O2)C(=C(C=C3OC)OC)Cl)O)C(CC(=O)OC)C4=CC(=C(C=C4)O)Cl	LLJBSQNWTISYOX-UHFFFAOYSA-N	methyl 3-(7-chloro-2'-hydroxy-4,6-dimethoxy-4'-methyl-3,6'-dioxospiro[1-benzofuran-2,3'-cyclohexene]-1'-yl)-3-(3-chloro-4-hydroxyphenyl)propanoate
132286397	methyl 3-(7-chloro-4'-hydroxy-4,6-dimethoxy-6'-methyl-2',3-dioxo-3H-spiro[1-benzofuran-2,1'-cyclohex[3]en]-3'-yl)-3-(4-oxo-4H-chromen-3-yl)propanoate	569	C29H25ClO10	CC1CC(=O)C(=C(C12C(=O)C3=C(O2)C(=C(C=C3OC)OC)Cl)O)C(CC(=O)OC)C4=COC5=CC=CC=C5C4=O	AVMUDZUEOSDYHX-UHFFFAOYSA-N	methyl 3-(7-chloro-2'-hydroxy-4,6-dimethoxy-4'-methyl-3,6'-dioxospiro[1-benzofuran-2,3'-cyclohexene]-1'-yl)-3-(4-oxochromen-3-yl)propanoate
132286457	methyl 3-(7-chloro-4'-hydroxy-4,6-dimethoxy-6'-methyl-2',3-dioxo-3H-spiro[1-benzofuran-2,1'-cyclohex[3]en]-3'-yl)-3-(3,4,5-trifluorophenyl)propanoate	554.9	C26H22ClF3O8	CC1CC(=O)C(=C(C12C(=O)C3=C(O2)C(=C(C=C3OC)OC)Cl)O)C(CC(=O)OC)C4=CC(=C(C(=C4)F)F)F	OSSUCCJRRXSNLX-UHFFFAOYSA-N	methyl 3-(7-chloro-2'-hydroxy-4,6-dimethoxy-4'-methyl-3,6'-dioxospiro[1-benzofuran-2,3'-cyclohexene]-1'-yl)-3-(3,4,5-trifluorophenyl)propanoate
132286496	methyl 3-(7-chloro-4'-hydroxy-4,6-dimethoxy-6'-methyl-2',3-dioxo-3H-spiro[1-benzofuran-2,1'-cyclohex[3]en]-3'-yl)-3-{4-[(2-methylprop-2-en-1-yl)oxy]phenyl}propanoate	571	C30H31ClO9	CC1CC(=O)C(=C(C12C(=O)C3=C(O2)C(=C(C=C3OC)OC)Cl)O)C(CC(=O)OC)C4=CC=C(C=C4)OCC(=C)C	VTNQGPXXPSMFQK-UHFFFAOYSA-N	methyl 3-(7-chloro-2'-hydroxy-4,6-dimethoxy-4'-methyl-3,6'-dioxospiro[1-benzofuran-2,3'-cyclohexene]-1'-yl)-3-[4-(2-methylprop-2-enoxy)phenyl]propanoate
132286528	methyl 3-(7-chloro-4'-hydroxy-4,6-dimethoxy-6'-methyl-2',3-dioxo-3H-spiro[1-benzofuran-2,1'-cyclohex[3]en]-3'-yl)-5-methylhexanoate	480.9	C24H29ClO8	CC1CC(=O)C(=C(C12C(=O)C3=C(O2)C(=C(C=C3OC)OC)Cl)O)C(CC(C)C)CC(=O)OC	UYPWDNDWNCKTGW-UHFFFAOYSA-N	methyl 3-(7-chloro-2'-hydroxy-4,6-dimethoxy-4'-methyl-3,6'-dioxospiro[1-benzofuran-2,3'-cyclohexene]-1'-yl)-5-methylhexanoate
133688441	(2R,5'S)-7-chloro-3',6-dimethoxy-5'-methyl-4-(trideuterio(113C)methoxy)spiro[1-benzofuran-2,4'-cyclohex-2-ene]-1',3-dione	356.77	C17H17ClO6	[2H][13C]([2H])([2H])OC1=CC(=C(C2=C1C(=O)[C@@]3(O2)[C@H](CC(=O)C=C3OC)C)Cl)OC	DDUHZTYCFQRHIY-TXUTUWALSA-N	(2R,5'S)-7-chloro-3',6-dimethoxy-5'-methyl-4-(trideuterio(113C)methoxy)spiro[1-benzofuran-2,4'-cyclohex-2-ene]-1',3-dione
134126306	3'-Butylsulfanyl-7-chloro-4,6-dimethoxy-5'-methylspiro[1-benzofuran-2,4'-cyclohex-2-ene]-1',3-dione	410.9	C20H23ClO5S	CCCCSC1=CC(=O)CC(C12C(=O)C3=C(O2)C(=C(C=C3OC)OC)Cl)C	OWSPAVAEFFTBCI-UHFFFAOYSA-N	3'-butylsulfanyl-7-chloro-4,6-dimethoxy-5'-methylspiro[1-benzofuran-2,4'-cyclohex-2-ene]-1',3-dione
134126307	7-Chloro-4,6-dimethoxy-5'-methyl-3'-propylsulfanylspiro[1-benzofuran-2,4'-cyclohex-2-ene]-1',3-dione	396.9	C19H21ClO5S	CCCSC1=CC(=O)CC(C12C(=O)C3=C(O2)C(=C(C=C3OC)OC)Cl)C	WIYJXIJMMUGGSG-UHFFFAOYSA-N	7-chloro-4,6-dimethoxy-5'-methyl-3'-propylsulfanylspiro[1-benzofuran-2,4'-cyclohex-2-ene]-1',3-dione
135027778	methyl (3R,6S)-3-[(2S,5'R)-7-chloro-1',6-dimethoxy-5'-methyl-3,3'-dioxospiro[1-benzofuran-2,6'-cyclohexene]-4-yl]oxy-6-hydroxycyclohexene-1-carboxylate	492.9	C24H25ClO9	C[C@@H]1CC(=O)C=C([C@]12C(=O)C3=C(O2)C(=C(C=C3O[C@@H]4CC[C@@H](C(=C4)C(=O)OC)O)OC)Cl)OC	KAAQNFHZYMKZQH-BQCOPOKISA-N	methyl (3R,6S)-3-[(2S,5'R)-7-chloro-1',6-dimethoxy-5'-methyl-3,3'-dioxospiro[1-benzofuran-2,6'-cyclohexene]-4-yl]oxy-6-hydroxycyclohexene-1-carboxylate
137467367	(2S)-7-chloro-3'-hydroxy-6-(2-hydroxyethoxy)-4-methoxyspiro[1-benzofuran-2,4'-cyclohex-2-ene]-1',3-dione	354.74	C16H15ClO7	COC1=CC(=C(C2=C1C(=O)[C@]3(O2)CCC(=O)C=C3O)Cl)OCCO	DGFGVZJHYHDMQJ-INIZCTEOSA-N	(2S)-7-chloro-3'-hydroxy-6-(2-hydroxyethoxy)-4-methoxyspiro[1-benzofuran-2,4'-cyclohex-2-ene]-1',3-dione
137467368	[(2S,5'R)-7-chloro-6-(2-hydroxyethoxy)-1'-methoxy-5'-methyl-3,3'-dioxospiro[1-benzofuran-2,6'-cyclohexene]-4-yl] hypoiodite	494.7	C17H16ClIO7	C[C@@H]1CC(=O)C=C([C@]12C(=O)C3=C(O2)C(=C(C=C3OI)OCCO)Cl)OC	UETXRDGFFSTRDH-RBHXEPJQSA-N	[(2S,5'R)-7-chloro-6-(2-hydroxyethoxy)-1'-methoxy-5'-methyl-3,3'-dioxospiro[1-benzofuran-2,6'-cyclohexene]-4-yl] hypoiodite
137467381	(2S,5'R)-7-chloro-3',6-dihydroxy-5'-methyl-4-[2-(oxan-2-yloxy)ethoxy]spiro[1-benzofuran-2,4'-cyclohex-2-ene]-1',3-dione	438.9	C21H23ClO8	C[C@@H]1CC(=O)C=C([C@]12C(=O)C3=C(C=C(C(=C3O2)Cl)O)OCCOC4CCCCO4)O	DHQVCVAXWBPSPL-KGLOGIMTSA-N	(2S,5'R)-7-chloro-3',6-dihydroxy-5'-methyl-4-[2-(oxan-2-yloxy)ethoxy]spiro[1-benzofuran-2,4'-cyclohex-2-ene]-1',3-dione
137467397	(2S)-7-chloro-3',4-dimethoxy-6-(2-methoxyethoxy)spiro[1-benzofuran-2,4'-cyclohex-2-ene]-1',3-dione	382.8	C18H19ClO7	COCCOC1=C(C2=C(C(=C1)OC)C(=O)[C@]3(O2)CCC(=O)C=C3OC)Cl	SQFIEEBMPZNFRV-SFHVURJKSA-N	(2S)-7-chloro-3',4-dimethoxy-6-(2-methoxyethoxy)spiro[1-benzofuran-2,4'-cyclohex-2-ene]-1',3-dione
137467447	(2S)-7-chloro-3',6-dihydroxy-4-methoxyspiro[1-benzofuran-2,4'-cyclohex-2-ene]-1',3-dione	310.68	C14H11ClO6	COC1=C2C(=C(C(=C1)O)Cl)O[C@@]3(C2=O)CCC(=O)C=C3O	NFWIDZBDNJJXAK-AWEZNQCLSA-N	(2S)-7-chloro-3',6-dihydroxy-4-methoxyspiro[1-benzofuran-2,4'-cyclohex-2-ene]-1',3-dione
137467524	(2S)-7-chloro-3',4-dihydroxy-6-methoxyspiro[1-benzofuran-2,4'-cyclohex-2-ene]-1',3-dione	310.68	C14H11ClO6	COC1=C(C2=C(C(=C1)O)C(=O)[C@]3(O2)CCC(=O)C=C3O)Cl	OFNXQGXLNMTQBI-AWEZNQCLSA-N	(2S)-7-chloro-3',4-dihydroxy-6-methoxyspiro[1-benzofuran-2,4'-cyclohex-2-ene]-1',3-dione
137467528	(2S,5'R)-7-chloro-3',4-dihydroxy-6-methoxy-5'-methylspiro[1-benzofuran-2,4'-cyclohex-2-ene]-1',3-dione	324.71	C15H13ClO6	C[C@@H]1CC(=O)C=C([C@]12C(=O)C3=C(O2)C(=C(C=C3O)OC)Cl)O	XRVXPPQKVYEPSM-BAHMLBHCSA-N	(2S,5'R)-7-chloro-3',4-dihydroxy-6-methoxy-5'-methylspiro[1-benzofuran-2,4'-cyclohex-2-ene]-1',3-dione
137641183	(2S,5'R)-7-chloro-4,6-dimethoxy-5'-methyl-3'-[(1S)-1-phenylethoxy]spiro[1-benzofuran-2,4'-cyclohex-2-ene]-1',3-dione	442.9	C24H23ClO6	C[C@@H]1CC(=O)C=C([C@]12C(=O)C3=C(O2)C(=C(C=C3OC)OC)Cl)O[C@@H](C)C4=CC=CC=C4	SCRIZINBCCMOCV-CDEUHXGRSA-N	(2S,5'R)-7-chloro-4,6-dimethoxy-5'-methyl-3'-[(1S)-1-phenylethoxy]spiro[1-benzofuran-2,4'-cyclohex-2-ene]-1',3-dione
137647518	(2S,5'R)-7-chloro-5-fluoro-3',4,6-trimethoxy-5'-methylspiro[1-benzofuran-2,4'-cyclohex-2-ene]-1',3-dione	370.8	C17H16ClFO6	C[C@@H]1CC(=O)C=C([C@]12C(=O)C3=C(O2)C(=C(C(=C3OC)F)OC)Cl)OC	GIRXJTBLCXBTBM-GJEGPGMTSA-N	(2S,5'R)-7-chloro-5-fluoro-3',4,6-trimethoxy-5'-methylspiro[1-benzofuran-2,4'-cyclohex-2-ene]-1',3-dione
137652147	(2S,5'R)-7-chloro-4,6-dimethoxy-5'-methyl-3'-[(1R)-1-phenylethoxy]spiro[1-benzofuran-2,4'-cyclohex-2-ene]-1',3-dione	442.9	C24H23ClO6	C[C@@H]1CC(=O)C=C([C@]12C(=O)C3=C(O2)C(=C(C=C3OC)OC)Cl)O[C@H](C)C4=CC=CC=C4	SCRIZINBCCMOCV-ICBMNTSNSA-N	(2S,5'R)-7-chloro-4,6-dimethoxy-5'-methyl-3'-[(1R)-1-phenylethoxy]spiro[1-benzofuran-2,4'-cyclohex-2-ene]-1',3-dione
137658162	(2S,5'R,6'R)-7-chloro-6'-hydroxy-3',4,6-trimethoxy-5'-methylspiro[1-benzofuran-2,4'-cyclohex-2-ene]-1',3-dione	368.8	C17H17ClO7	C[C@@H]1[C@H](C(=O)C=C([C@]12C(=O)C3=C(O2)C(=C(C=C3OC)OC)Cl)OC)O	SJUXBYNINSBOOT-DKNUKLLMSA-N	(2S,5'R,6'R)-7-chloro-6'-hydroxy-3',4,6-trimethoxy-5'-methylspiro[1-benzofuran-2,4'-cyclohex-2-ene]-1',3-dione
138490235	[(2S,5'R)-7-chloro-1',4-dimethoxy-5'-methyl-3,3'-dioxospiro[1-benzofuran-2,6'-cyclohexene]-6-yl] trifluoromethanesulfonate	470.8	C17H14ClF3O8S	C[C@@H]1CC(=O)C=C([C@]12C(=O)C3=C(O2)C(=C(C=C3OC)OS(=O)(=O)C(F)(F)F)Cl)OC	GPZAUNZBXQESAS-QZTNRIJFSA-N	[(2S,5'R)-7-chloro-1',4-dimethoxy-5'-methyl-3,3'-dioxospiro[1-benzofuran-2,6'-cyclohexene]-6-yl] trifluoromethanesulfonate
138496616	[(2S,5'R)-7-chloro-1',4-dimethoxy-5'-methyl-3,3'-dioxospiro[1-benzofuran-2,6'-cyclohexene]-6-yl] trifluoromethanesulfinate	454.8	C17H14ClF3O7S	C[C@@H]1CC(=O)C=C([C@]12C(=O)C3=C(O2)C(=C(C=C3OC)OS(=O)C(F)(F)F)Cl)OC	AAZIKTODNOQZHR-ASDUUJBVSA-N	[(2S,5'R)-7-chloro-1',4-dimethoxy-5'-methyl-3,3'-dioxospiro[1-benzofuran-2,6'-cyclohexene]-6-yl] trifluoromethanesulfinate
138514334	(2S,5'R)-7-chloro-4-(difluoromethoxy)-3'-hydroxy-5'-methyl-6-(trifluoromethylsulfanyloxy)spiro[1-benzofuran-2,4'-cyclohex-2-ene]-1',3-dione	460.8	C16H10ClF5O6S	C[C@@H]1CC(=O)C=C([C@]12C(=O)C3=C(O2)C(=C(C=C3OC(F)F)OSC(F)(F)F)Cl)O	JVRALZQWZAHLJP-BMSCFWOVSA-N	(2S,5'R)-7-chloro-4-(difluoromethoxy)-3'-hydroxy-5'-methyl-6-(trifluoromethylsulfanyloxy)spiro[1-benzofuran-2,4'-cyclohex-2-ene]-1',3-dione
138514335	(2S,5'R)-7-chloro-4-(difluoromethoxy)-3'-hydroxy-6-methoxy-5'-methylspiro[1-benzofuran-2,4'-cyclohex-2-ene]-1',3-dione	374.72	C16H13ClF2O6	C[C@@H]1CC(=O)C=C([C@]12C(=O)C3=C(O2)C(=C(C=C3OC(F)F)OC)Cl)O	AVXZKKFRXBSTBK-KXHHVGMCSA-N	(2S,5'R)-7-chloro-4-(difluoromethoxy)-3'-hydroxy-6-methoxy-5'-methylspiro[1-benzofuran-2,4'-cyclohex-2-ene]-1',3-dione
138514336	(2S,5'R)-7-chloro-4-(difluoromethoxy)-3',6-dihydroxy-5'-methylspiro[1-benzofuran-2,4'-cyclohex-2-ene]-1',3-dione	360.69	C15H11ClF2O6	C[C@@H]1CC(=O)C=C([C@]12C(=O)C3=C(C=C(C(=C3O2)Cl)O)OC(F)F)O	GBUQSJUDGHUKHU-BMSCFWOVSA-N	(2S,5'R)-7-chloro-4-(difluoromethoxy)-3',6-dihydroxy-5'-methylspiro[1-benzofuran-2,4'-cyclohex-2-ene]-1',3-dione
138514463	(2S,5'R)-7-chloro-3'-hydroxy-4-methoxy-5'-methyl-6-(trifluoromethylsulfanyloxy)spiro[1-benzofuran-2,4'-cyclohex-2-ene]-1',3-dione	424.8	C16H12ClF3O6S	C[C@@H]1CC(=O)C=C([C@]12C(=O)C3=C(O2)C(=C(C=C3OC)OSC(F)(F)F)Cl)O	GRRMFEAXDUHPBG-BAHMLBHCSA-N	(2S,5'R)-7-chloro-3'-hydroxy-4-methoxy-5'-methyl-6-(trifluoromethylsulfanyloxy)spiro[1-benzofuran-2,4'-cyclohex-2-ene]-1',3-dione
138514465	(2S,5'R)-7-chloro-3'-hydroxy-6-(2-hydroxyethoxy)-4-methoxy-5'-methylspiro[1-benzofuran-2,4'-cyclohex-2-ene]-1',3-dione	368.8	C17H17ClO7	C[C@@H]1CC(=O)C=C([C@]12C(=O)C3=C(O2)C(=C(C=C3OC)OCCO)Cl)O	DFKZPFGLFYTXIJ-RBHXEPJQSA-N	(2S,5'R)-7-chloro-3'-hydroxy-6-(2-hydroxyethoxy)-4-methoxy-5'-methylspiro[1-benzofuran-2,4'-cyclohex-2-ene]-1',3-dione
139584816	6'-Hydroxygriseofulvin	368.8	C17H17ClO7	CC1(CC(=O)C=C([C@]12C(=O)C3=C(O2)C(=C(C=C3OC)OC)Cl)OC)O	YDKPJFXWSXNUCX-DJNXLDHESA-N	(2S)-7-chloro-5'-hydroxy-3',4,6-trimethoxy-5'-methylspiro[1-benzofuran-2,4'-cyclohex-2-ene]-1',3-dione
139588134	7-chloro-2,5,6-trimethoxy-6-methylspiro(benzofuran-2(3H),1-(2) cyclohexene)-3,4-dione	352.8	C17H17ClO6	C[C@@H]1CC(=O)C=C(C12C(=O)C3=CC(=C(C(=C3O2)Cl)OC)OC)OC	PTVPHTFSNQVBQH-OEWHWVHBSA-N	(5'R)-7-chloro-3',5,6-trimethoxy-5'-methylspiro[1-benzofuran-2,4'-cyclohex-2-ene]-1',3-dione
142550519	(2S,5'R)-7-chloro-4-(difluoromethoxy)-3',6-dimethoxy-5'-methylspiro[1-benzofuran-2,4'-cyclohex-2-ene]-1',3-dione	388.7	C17H15ClF2O6	C[C@@H]1CC(=O)C=C([C@]12C(=O)C3=C(O2)C(=C(C=C3OC(F)F)OC)Cl)OC	LGHHNIHQJDDWTA-GJEGPGMTSA-N	(2S,5'R)-7-chloro-4-(difluoromethoxy)-3',6-dimethoxy-5'-methylspiro[1-benzofuran-2,4'-cyclohex-2-ene]-1',3-dione
142550524	(2S,5'R)-7-chloro-1',4-dimethoxy-5'-methyl-3,3'-dioxospiro[1-benzofuran-2,6'-cyclohexene]-6-carbaldehyde	350.7	C17H15ClO6	C[C@@H]1CC(=O)C=C([C@]12C(=O)C3=C(C=C(C(=C3O2)Cl)C=O)OC)OC	HPRHLUJNVCWWGA-RBHXEPJQSA-N	(2S,5'R)-7-chloro-1',4-dimethoxy-5'-methyl-3,3'-dioxospiro[1-benzofuran-2,6'-cyclohexene]-6-carbaldehyde
142550537	[(2S,5'R)-7-chloro-4-(difluoromethoxy)-1'-methoxy-5'-methyl-3,3'-dioxospiro[1-benzofuran-2,6'-cyclohexene]-6-yl] trifluoromethanesulfonate	506.8	C17H12ClF5O8S	C[C@@H]1CC(=O)C=C([C@]12C(=O)C3=C(O2)C(=C(C=C3OC(F)F)OS(=O)(=O)C(F)(F)F)Cl)OC	QPAYTWYFLZHYEK-KXHHVGMCSA-N	[(2S,5'R)-7-chloro-4-(difluoromethoxy)-1'-methoxy-5'-methyl-3,3'-dioxospiro[1-benzofuran-2,6'-cyclohexene]-6-yl] trifluoromethanesulfonate
142550538	(2S,5'R)-7-chloro-4-(difluoromethoxy)-6-hydroxy-3'-methoxy-5'-methylspiro[1-benzofuran-2,4'-cyclohex-2-ene]-1',3-dione	374.72	C16H13ClF2O6	C[C@@H]1CC(=O)C=C([C@]12C(=O)C3=C(C=C(C(=C3O2)Cl)O)OC(F)F)OC	ONNWUFXBTAASFW-KXHHVGMCSA-N	(2S,5'R)-7-chloro-4-(difluoromethoxy)-6-hydroxy-3'-methoxy-5'-methylspiro[1-benzofuran-2,4'-cyclohex-2-ene]-1',3-dione
144564060	but-2-ene;(2S)-7-chloro-4,6-dimethoxy-2',3',6'-trimethylspiro[1-benzofuran-2,1'-cyclohexane]-3-one	394.9	C22H31ClO4	CC=CC.CC1CCC([C@]2(C1C)C(=O)C3=C(O2)C(=C(C=C3OC)OC)Cl)C	XMJWEBWAYVWUOG-HPZAFXODSA-N	but-2-ene;(2S)-7-chloro-4,6-dimethoxy-2',3',6'-trimethylspiro[1-benzofuran-2,1'-cyclohexane]-3-one
144564061	(2S)-7-chloro-4,6-dimethoxy-2',3',6'-trimethylspiro[1-benzofuran-2,1'-cyclohexane]-3-one	338.8	C18H23ClO4	CC1CCC([C@]2(C1C)C(=O)C3=C(O2)C(=C(C=C3OC)OC)Cl)C	DYKIXXALBORGDB-XVRRDUKYSA-N	(2S)-7-chloro-4,6-dimethoxy-2',3',6'-trimethylspiro[1-benzofuran-2,1'-cyclohexane]-3-one
144564067	3-[(2S)-7-chloro-4,6-dimethoxy-3-oxo-2-[(Z)-prop-1-enyl]-1-benzofuran-2-yl]butanal	338.8	C17H19ClO5	C/C=C\\[C@]1(C(=O)C2=C(O1)C(=C(C=C2OC)OC)Cl)C(C)CC=O	LWLBVKDMCRAGJK-AIAHANLBSA-N	3-[(2S)-7-chloro-4,6-dimethoxy-3-oxo-2-[(Z)-prop-1-enyl]-1-benzofuran-2-yl]butanal
144564118	(2S)-7-chloro-2'-ethoxy-4,6-dimethoxy-7'-methylspiro[1-benzofuran-2,8'-3,4,6,7-tetrahydro-2H-chromene]-3,5'-dione;ethane	452.9	C23H29ClO7	CC.CCOC1CCC2=C(O1)[C@@]3(C(CC2=O)C)C(=O)C4=C(O3)C(=C(C=C4OC)OC)Cl	XWPJQBCONZTSSE-ZQTUFJJRSA-N	(2S)-7-chloro-2'-ethoxy-4,6-dimethoxy-7'-methylspiro[1-benzofuran-2,8'-3,4,6,7-tetrahydro-2H-chromene]-3,5'-dione;ethane
144564119	(2S)-7-chloro-2'-ethoxy-4,6-dimethoxy-7'-methylspiro[1-benzofuran-2,8'-3,4,6,7-tetrahydro-2H-chromene]-3,5'-dione	422.9	C21H23ClO7	CCOC1CCC2=C(O1)[C@@]3(C(CC2=O)C)C(=O)C4=C(O3)C(=C(C=C4OC)OC)Cl	YJCHRBGEDNSUQQ-HPPBBHNFSA-N	(2S)-7-chloro-2'-ethoxy-4,6-dimethoxy-7'-methylspiro[1-benzofuran-2,8'-3,4,6,7-tetrahydro-2H-chromene]-3,5'-dione
144564145	(2S,3'R,6'R)-7-chloro-4,6-dimethoxy-6'-methyl-3'-phenyl-6'-sulfanylspiro[1-benzofuran-2,5'-3,7-dihydro-2H-1-benzofuran]-3,4'-dione	472.9	C24H21ClO6S	C[C@]1(CC2=C([C@H](CO2)C3=CC=CC=C3)C(=O)[C@]14C(=O)C5=C(O4)C(=C(C=C5OC)OC)Cl)S	LSAJALLHJFXHDW-DHTHFVMWSA-N	(2S,3'R,6'R)-7-chloro-4,6-dimethoxy-6'-methyl-3'-phenyl-6'-sulfanylspiro[1-benzofuran-2,5'-3,7-dihydro-2H-1-benzofuran]-3,4'-dione
144564153	(2S)-7-chloro-2'-(2-hydroxyethyl)-4,6-dimethoxy-6'-methyl-2'-phenylspiro[1-benzofuran-2,7'-5,6-dihydro-3H-1-benzofuran]-3,4'-dione	484.9	C26H25ClO7	CC1CC(=O)C2=C([C@]13C(=O)C4=C(O3)C(=C(C=C4OC)OC)Cl)OC(C2)(CCO)C5=CC=CC=C5	NWIRMVAINQIMGM-LMSYFYENSA-N	(2S)-7-chloro-2'-(2-hydroxyethyl)-4,6-dimethoxy-6'-methyl-2'-phenylspiro[1-benzofuran-2,7'-5,6-dihydro-3H-1-benzofuran]-3,4'-dione
146559679	(2S)-7-chloro-6-(2-hydroxyethoxy)-3',4-dimethoxyspiro[1-benzofuran-2,4'-cyclohex-2-ene]-1',3-dione	368.8	C17H17ClO7	COC1=CC(=C(C2=C1C(=O)[C@]3(O2)CCC(=O)C=C3OC)Cl)OCCO	IHMBHUSDZZOUHY-KRWDZBQOSA-N	(2S)-7-chloro-6-(2-hydroxyethoxy)-3',4-dimethoxyspiro[1-benzofuran-2,4'-cyclohex-2-ene]-1',3-dione
147116578	methyl (7R,8S)-7'-chloro-4',6'-dimethoxy-7-methyl-3',5-dioxo-4-phenylspiro[1,4,6,7-tetrahydronaphthalene-8,2'-1-benzofuran]-2-carboxylate	508.9	C28H25ClO7	C[C@@H]1CC(=O)C2=C([C@]13C(=O)C4=C(O3)C(=C(C=C4OC)OC)Cl)CC(=CC2C5=CC=CC=C5)C(=O)OC	BNNOYCWIRHPTBI-BIXJHLNHSA-N	methyl (7R,8S)-7'-chloro-4',6'-dimethoxy-7-methyl-3',5-dioxo-4-phenylspiro[1,4,6,7-tetrahydronaphthalene-8,2'-1-benzofuran]-2-carboxylate
147554571	(2S)-7-chloro-4,6-dimethoxy-2-[(2S)-propan-2-yl]-2-prop-1-enyl-1-benzofuran-3-one;yttrium	397.66	C16H17ClO4Y-2	C[C-]=C[C@]1(C(=O)C2=C(O1)C(=C(C=C2OC)OC)Cl)[C@H](C)[CH2-].[Y]	UZGAKOZPTKAQOB-QDOFGCGHSA-N	(2S)-7-chloro-4,6-dimethoxy-2-[(2S)-propan-2-yl]-2-prop-1-enyl-1-benzofuran-3-one;yttrium
147554572	(2S)-7-chloro-4,6-dimethoxy-2-propan-2-yl-2-prop-1-enyl-1-benzofuran-3-one	310.77	C16H19ClO4	CC=C[C@]1(C(=O)C2=C(O1)C(=C(C=C2OC)OC)Cl)C(C)C	UDAXXGSETSWNGZ-MRXNPFEDSA-N	(2S)-7-chloro-4,6-dimethoxy-2-propan-2-yl-2-prop-1-enyl-1-benzofuran-3-one
148240297	C=12C(=O)COC2=C(Cl)C(OC)=CC=1OCC1=CC=CC=C1	304.72	C16H13ClO4	COC1=C(C2=C(C(=O)CO2)C(=C1)OCC3=CC=CC=C3)Cl	DMPIANKUHPNHSS-UHFFFAOYSA-N	7-chloro-6-methoxy-4-phenylmethoxy-1-benzofuran-3-one
153852916	CC(CC(C)=O)C1OC2=C(C(=CC(=C2C1=O)OC)OC)Cl	312.74	C15H17ClO5	CC(CC(=O)C)C1C(=O)C2=C(O1)C(=C(C=C2OC)OC)Cl	JVIBLLQUDRHCHS-UHFFFAOYSA-N	7-chloro-4,6-dimethoxy-2-(4-oxopentan-2-yl)-1-benzofuran-3-one
153852917	O=C(CCC1OC2=C(C(=CC(=C2C1=O)OC)OC)Cl)C	298.72	C14H15ClO5	CC(=O)CCC1C(=O)C2=C(O1)C(=C(C=C2OC)OC)Cl	OFKQHHYULWNZQR-UHFFFAOYSA-N	7-chloro-4,6-dimethoxy-2-(3-oxobutyl)-1-benzofuran-3-one
153989287	(2S,5'R)-7-chloro-1',4-dimethoxy-5'-methyl-3,3'-dioxospiro[1-benzofuran-2,6'-cyclohexene]-6-carboxylate	365.7	C17H14ClO7-	C[C@@H]1CC(=O)C=C([C@]12C(=O)C3=C(C=C(C(=C3O2)Cl)C(=O)[O-])OC)OC	AQESHBVBTUHASK-GJEGPGMTSA-M	(2S,5'R)-7-chloro-1',4-dimethoxy-5'-methyl-3,3'-dioxospiro[1-benzofuran-2,6'-cyclohexene]-6-carboxylate
154178022	COC(=O)C1(OC2=C(Cl)C(OC)=CC(OC)=C2C1=O)C(C)CC(C)=O	370.8	C17H19ClO7	CC(CC(=O)C)C1(C(=O)C2=C(O1)C(=C(C=C2OC)OC)Cl)C(=O)OC	RPVKPUSUQSXUHB-UHFFFAOYSA-N	methyl 7-chloro-4,6-dimethoxy-3-oxo-2-(4-oxopentan-2-yl)-1-benzofuran-2-carboxylate
154388188	COC(=O)C1(CCC(C)=O)OC2=C(Cl)C(OC)=CC(OC)=C2C1=O	356.75	C16H17ClO7	CC(=O)CCC1(C(=O)C2=C(O1)C(=C(C=C2OC)OC)Cl)C(=O)OC	MQQKRYZTNHPPRD-UHFFFAOYSA-N	methyl 7-chloro-4,6-dimethoxy-3-oxo-2-(3-oxobutyl)-1-benzofuran-2-carboxylate
154593892	(2S,5'R)-7-chloro-4-(difluoromethoxy)-6-ethyl-3'-methoxy-5'-methylspiro[1-benzofuran-2,4'-cyclohex-2-ene]-1',3-dione	386.8	C18H17ClF2O5	CCC1=CC(=C2C(=C1Cl)O[C@@]3(C2=O)[C@@H](CC(=O)C=C3OC)C)OC(F)F	PXAUWJSZHJLADV-CVJBHZAOSA-N	(2S,5'R)-7-chloro-4-(difluoromethoxy)-6-ethyl-3'-methoxy-5'-methylspiro[1-benzofuran-2,4'-cyclohex-2-ene]-1',3-dione
157058015	NULL	472.8	C17H16ClF3O8S	C[C@@H]1CC(=O)C=C([C@]12C(=O)C3=C(O2)C(=C(C=C3OC)OS(=O)C(F)(F)F)Cl)OC.O	CMKGNKWFYUULKN-QZUHMSFKSA-N	[(2S,5'R)-7-chloro-1',4-dimethoxy-5'-methyl-3,3'-dioxospiro[1-benzofuran-2,6'-cyclohexene]-6-yl] trifluoromethanesulfinate;hydrate
157376471	NULL	755.6	C39H40Cl2O11	CC1CC(=C)C2=C(C13C(=O)C4=C(O3)C(=C(C=C4OC)OC)Cl)OC(C2)C.CC1CC(=O)C2=C(C13C(=O)C4=C(O3)C(=C(C=C4OC)OC)Cl)OCCC2	BKJPNAJBRIKQTC-UHFFFAOYSA-N	7-chloro-4,6-dimethoxy-2',6'-dimethyl-4'-methylidenespiro[1-benzofuran-2,7'-2,3,5,6-tetrahydro-1-benzofuran]-3-one;7-chloro-4,6-dimethoxy-7'-methylspiro[1-benzofuran-2,8'-3,4,6,7-tetrahydro-2H-chromene]-3,5'-dione
161262405	NULL	433.7	C19H17ClO4Y-2	C[C@H]([CH2-])[C@@]1(C(=O)C2=C(O1)C(=C(C=C2OC)OC)Cl)C3=CC=CC=[C-]3.[Y]	IRLADODZOVNANT-ZWLLKMRYSA-N	(2S)-7-chloro-4,6-dimethoxy-2-phenyl-2-[(2S)-propan-2-yl]-1-benzofuran-3-one;yttrium
161262406	NULL	346.8	C19H19ClO4	CC(C)[C@@]1(C(=O)C2=C(O1)C(=C(C=C2OC)OC)Cl)C3=CC=CC=C3	FUWDNVWGPSWFBP-IBGZPJMESA-N	(2S)-7-chloro-4,6-dimethoxy-2-phenyl-2-propan-2-yl-1-benzofuran-3-one
161267575	NULL	526.9	C28H24ClFO7	C[C@@H]1CC(=O)C2=C([C@]13C(=O)C4=C(O3)C(=C(C=C4OC)OC)Cl)CC(=CC2C5=CC=C(C=C5)F)C(=O)OC	VDJVQPTWTILVKB-CCAYUUBBSA-N	methyl (7R,8S)-7'-chloro-4-(4-fluorophenyl)-4',6'-dimethoxy-7-methyl-3',5-dioxospiro[1,4,6,7-tetrahydronaphthalene-8,2'-1-benzofuran]-2-carboxylate
161564856	NULL	350.8	C18H19ClO5	CC1=COC(=C1)[C@]2(C(=O)C3=C(O2)C(=C(C=C3OC)OC)Cl)C(C)C	VAFDDTKELPAAAF-SFHVURJKSA-N	(2S)-7-chloro-4,6-dimethoxy-2-(4-methylfuran-2-yl)-2-propan-2-yl-1-benzofuran-3-one
161564857	NULL	380.9	C20H25ClO5	CC1C(C=C(O1)[C@]2(C(=O)C3=C(O2)C(=C(C=C3OC)OC)Cl)C(C)C)(C)C	VZARBXNOPRQSEW-XRDRKEPISA-N	(2S)-7-chloro-4,6-dimethoxy-2-propan-2-yl-2-(2,3,3-trimethyl-2H-furan-5-yl)-1-benzofuran-3-one
161564859	NULL	422.9	C23H31ClO5	CC1C(C(C=C(O1)[C@]2(C(=O)C3=C(O2)C(=C(C=C3OC)OC)Cl)C(C)C)(C)C)(C)C	GDGZHDWKXKHEHX-XXXNXYCNSA-N	(2S)-7-chloro-4,6-dimethoxy-2-(2,3,3,4,4-pentamethyl-2H-pyran-6-yl)-2-propan-2-yl-1-benzofuran-3-one
161564860	NULL	457	C26H29ClO5	CC1C2=C(C=C(C(=C2C)C)C)C=C(O1)[C@]3(C(=O)C4=C(O3)C(=C(C=C4OC)OC)Cl)C(C)C	JBINRNNQUZSKLB-TZHIXCAUSA-N	(2S)-7-chloro-4,6-dimethoxy-2-propan-2-yl-2-(1,6,7,8-tetramethyl-1H-isochromen-3-yl)-1-benzofuran-3-one
162294201	NULL	338.8	C18H23ClO4	CC(C)[C@@]1(C(=O)C2=C(O1)C(=C(C=C2OC)OC)Cl)C3CCCC3	DQIYHIWIDGEFLZ-SFHVURJKSA-N	(2S)-7-chloro-2-cyclopentyl-4,6-dimethoxy-2-propan-2-yl-1-benzofuran-3-one
162294202	NULL	447.7	C20H19ClO4Y-2	C[C@H]([CH2-])[C@@]1(C(=O)C2=C(O1)C(=C(C=C2OC)OC)Cl)C3=[C-]C=CC=CC3.[Y]	NZDXLVCEYLEJPR-JFZHLQQUSA-N	(2S)-7-chloro-2-cyclohepta-1,3,5-trien-1-yl-4,6-dimethoxy-2-[(2S)-propan-2-yl]-1-benzofuran-3-one;yttrium
162294203	NULL	360.8	C20H21ClO4	CC(C)[C@@]1(C(=O)C2=C(O1)C(=C(C=C2OC)OC)Cl)C3=CC=CC=CC3	DNTBBQVKHZMBGC-FQEVSTJZSA-N	(2S)-7-chloro-2-cyclohepta-1,3,5-trien-1-yl-4,6-dimethoxy-2-propan-2-yl-1-benzofuran-3-one
