# Supplementary material for: In Silico Molecular Dynamics of Griseofulvin and Its Derivatives Revealed Potential Therapeutic Applications for COVID-19
Source: Int J Mol Sci. 2022 Jun 21;23(13):6889. doi: 10.3390/ijms23136889 (PMC9267096; doi:10.3390/ijms23136889)
Supplement: Supplementary file 1 [file ijms-23-06889-s001.zip › File S3.xls]

## Sheet: PyRx_Mprotease
Ligand	Binding Affinity	rmsd/ub	rmsd/lb
6LU7_144564153_uff_E=641.96	-7.9	0	0
6LU7_118263244_uff_E=641.96	-7.9	0	0
6LU7_118254182_uff_E=641.96	-7.9	0	0
6LU7_118254145_uff_E=558.28	-7.9	0	0
6LU7_118254142_uff_E=558.28	-7.9	0	0
6LU7_142550537_uff_E=823.03	-7.8	0	0
6LU7_73331488_uff_E=637.67	-7.8	0	0
6LU7_46844082_uff_E=682.67	-7.8	0	0
6LU7_118254214_uff_E=630.93	-7.7	0	0
6LU7_46844082_uff_E=682.67	-7.7	3.686	0.371
6LU7_25171849_uff_E=574.34	-7.6	0	0
6LU7_73330910_uff_E=648.69	-7.6	0	0
6LU7_44566068_uff_E=401.62	-7.6	0	0
6LU7_138514463_uff_E=391.15	-7.5	0	0
6LU7_138496616_uff_E=483.72	-7.5	0	0
6LU7_138490235_uff_E=829.78	-7.5	0	0
6LU7_118263233_uff_E=562.91	-7.5	0	0
6LU7_73331208_uff_E=661.17	-7.5	0	0
6LU7_73331205_uff_E=629.44	-7.5	0	0
6LU7_73331205_uff_E=629.44	-7.5	7.489	4.154
6LU7_56950846_uff_E=485.31	-7.5	0	0
6LU7_46844082_uff_E=682.67	-7.5	4.389	2.156
6LU7_617268_uff_E=361.47	-7.5	0	0
6LU7_6452395_uff_E=485.14	-7.4	0	0
6LU7_138514334_uff_E=388.58	-7.4	0	0
6LU7_118263248_uff_E=603.75	-7.4	0	0
6LU7_118263241_uff_E=578.46	-7.4	0	0
6LU7_118263233_uff_E=562.91	-7.4	7.01	2.743
6LU7_73331349_uff_E=627.67	-7.4	0	0
6LU7_73331060_uff_E=634.29	-7.4	0	0
6LU7_73330762_uff_E=621.15	-7.4	0	0
6LU7_73330625_uff_E=631.30	-7.4	0	0
6LU7_46844082_uff_E=682.67	-7.4	5.035	2.254
6LU7_44566075_uff_E=523.32	-7.4	0	0
6LU7_56950845_uff_E=553.08	-7.3	0	0
6LU7_147116578_uff_E=520.21	-7.3	0	0
6LU7_123846923_uff_E=605.00	-7.3	0	0
6LU7_118267073_uff_E=557.12	-7.3	0	0
6LU7_118254131_uff_E=612.52	-7.3	0	0
6LU7_118254083_uff_E=620.90	-7.3	0	0
6LU7_73331345_uff_E=668.75	-7.3	0	0
6LU7_23955821_uff_E=351.99	-7.3	0	0
6LU7_25171849_uff_E=574.34	-7.2	7.573	3.864
6LU7_15086460_uff_E=467.63	-7.2	0	0
6LU7_138514465_uff_E=385.97	-7.2	0	0
6LU7_137467528_uff_E=393.76	-7.2	0	0
6LU7_118263243_uff_E=326.16	-7.2	0	0
6LU7_118263241_uff_E=578.46	-7.2	7.825	2.521
6LU7_118263228_uff_E=472.25	-7.2	0	0
6LU7_118254216_uff_E=633.63	-7.2	0	0
6LU7_75218824_uff_E=483.43	-7.2	0	0
6LU7_73331487_uff_E=640.93	-7.2	0	0
6LU7_73331347_uff_E=651.09	-7.2	0	0
6LU7_73331346_uff_E=611.27	-7.2	0	0
6LU7_73331346_uff_E=611.27	-7.2	6.688	2.827
6LU7_73331344_uff_E=637.78	-7.2	0	0
6LU7_73331209_uff_E=661.60	-7.2	0	0
6LU7_73330763_uff_E=714.76	-7.2	0	0
6LU7_23955821_uff_E=351.99	-7.2	6.207	2.405
6LU7_617713_uff_E=360.61	-7.2	0	0
6LU7_21677661_uff_E=485.34	-7.1	0	0
6LU7_25171849_uff_E=574.34	-7.1	7.147	3.155
6LU7_57393956_uff_E=482.31	-7.1	0	0
6LU7_56950845_uff_E=553.08	-7.1	8.915	3.333
6LU7_44139586_uff_E=530.12	-7.1	0	0
6LU7_147116578_uff_E=520.21	-7.1	7.509	2.696
6LU7_138496616_uff_E=483.72	-7.1	4.799	2.961
6LU7_123836216_uff_E=631.96	-7.1	0	0
6LU7_123350254_uff_E=1809.62	-7.1	0	0
6LU7_118254232_uff_E=631.91	-7.1	0	0
6LU7_118254190_uff_E=511.99	-7.1	0	0
6LU7_75218864_uff_E=499.12	-7.1	0	0
6LU7_73331348_uff_E=633.58	-7.1	0	0
6LU7_73330762_uff_E=621.15	-7.1	4.516	2.303
6LU7_73330762_uff_E=621.15	-7.1	8.5	4.484
6LU7_73330625_uff_E=631.30	-7.1	1.301	0.954
6LU7_57390407_uff_E=486.36	-7.1	0	0
6LU7_56950846_uff_E=485.31	-7.1	7.928	3.546
6LU7_56950846_uff_E=485.31	-7.1	3.468	2.673
6LU7_46844082_uff_E=682.67	-7.1	2.709	1.97
6LU7_10097_uff_E=554.35	-7.1	0	0
6LU7_71317160_uff_E=364.50	-7	0	0
6LU7_161302_uff_E=363.38	-7	0	0
6LU7_25171849_uff_E=574.34	-7	4.303	2.507
6LU7_57397526_uff_E=321.86	-7	0	0
6LU7_56950845_uff_E=553.08	-7	8.661	2.61
6LU7_56950845_uff_E=553.08	-7	2.483	1.521
6LU7_44139586_uff_E=530.12	-7	7.219	2.814
6LU7_630845_uff_E=373.54	-7	0	0
6LU7_142550538_uff_E=347.64	-7	0	0
6LU7_142550538_uff_E=347.64	-7	6.468	3.223
6LU7_142550537_uff_E=823.03	-7	5.07	3.535
6LU7_142550519_uff_E=411.61	-7	0	0
6LU7_138514335_uff_E=406.05	-7	0	0
6LU7_138514335_uff_E=406.05	-7	6.188	2.661
6LU7_123825667_uff_E=368.14	-7	0	0
6LU7_123361815_uff_E=380.82	-7	0	0
6LU7_123361815_uff_E=380.82	-7	6.257	2.439
6LU7_118267052_uff_E=464.23	-7	0	0
6LU7_118263268_uff_E=1104.59	-7	0	0
6LU7_118263237_uff_E=588.21	-7	0	0
6LU7_118254131_uff_E=612.52	-7	7.694	2.714
6LU7_118207010_uff_E=1815.50	-7	0	0
6LU7_73331629_uff_E=624.62	-7	0	0
6LU7_73331491_uff_E=631.59	-7	0	0
6LU7_73331349_uff_E=627.67	-7	7.272	2.942
6LU7_73331349_uff_E=627.67	-7	7.535	4.618
6LU7_73331344_uff_E=637.78	-7	9.021	3.574
6LU7_56950846_uff_E=485.31	-7	4.648	2.73
6LU7_46844082_uff_E=682.67	-7	5.57	3.005
6LU7_44566075_uff_E=523.32	-7	8.306	2.79
6LU7_566721_uff_E=474.85	-7	0	0
6LU7_71317160_uff_E=364.50	-6.9	6.174	2.545
6LU7_44139588_uff_E=509.86	-6.9	0	0
6LU7_25172057_uff_E=459.89	-6.9	0	0
6LU7_25171849_uff_E=574.34	-6.9	6.643	3.66
6LU7_25171849_uff_E=574.34	-6.9	7.537	3.432
6LU7_15086460_uff_E=467.63	-6.9	6.128	2.263
6LU7_57393956_uff_E=482.31	-6.9	7.45	3.546
6LU7_56950845_uff_E=553.08	-6.9	5.565	3.28
6LU7_44139590_uff_E=680.31	-6.9	0	0
6LU7_44139590_uff_E=680.31	-6.9	7.329	2.287
6LU7_44139590_uff_E=680.31	-6.9	8.116	2.668
6LU7_44139586_uff_E=530.12	-6.9	7.591	3.85
6LU7_142550519_uff_E=411.61	-6.9	6.489	2.752
6LU7_138514465_uff_E=385.97	-6.9	6.757	2.416
6LU7_138514336_uff_E=331.78	-6.9	0	0
6LU7_138514336_uff_E=331.78	-6.9	5.948	2.681
6LU7_137467381_uff_E=489.66	-6.9	0	0
6LU7_123704177_uff_E=624.00	-6.9	0	0
6LU7_123293391_uff_E=636.92	-6.9	0	0
6LU7_118267052_uff_E=464.23	-6.9	4.529	2.773
6LU7_118263269_uff_E=1102.50	-6.9	0	0
6LU7_118263247_uff_E=624.00	-6.9	0	0
6LU7_118263231_uff_E=574.80	-6.9	0	0
6LU7_118254216_uff_E=633.63	-6.9	3.756	2.257
6LU7_118254213_uff_E=644.51	-6.9	0	0
6LU7_118254145_uff_E=558.28	-6.9	7.228	2.981
6LU7_118254142_uff_E=558.28	-6.9	6.064	3.462
6LU7_118254142_uff_E=558.28	-6.9	7.223	3.001
6LU7_118254131_uff_E=612.52	-6.9	7.352	2.524
6LU7_75218864_uff_E=499.12	-6.9	3.21	2.689
6LU7_73331628_uff_E=624.00	-6.9	0	0
6LU7_73331490_uff_E=626.42	-6.9	0	0
6LU7_73331346_uff_E=611.27	-6.9	6.649	3.603
6LU7_73331209_uff_E=661.60	-6.9	8.86	3.207
6LU7_73331205_uff_E=629.44	-6.9	3.338	2.259
6LU7_73330911_uff_E=636.92	-6.9	0	0
6LU7_73330766_uff_E=651.99	-6.9	0	0
6LU7_70876805_uff_E=498.65	-6.9	0	0
6LU7_68727702_uff_E=407.12	-6.9	0	0
6LU7_56950846_uff_E=485.31	-6.9	3.43	2.18
6LU7_46844082_uff_E=682.67	-6.9	5.387	3.027
6LU7_574586_uff_E=496.46	-6.9	0	0
6LU7_9974417_uff_E=422.04	-6.8	0	0
6LU7_44139588_uff_E=509.86	-6.8	3.468	1.734
6LU7_25172057_uff_E=459.89	-6.8	6.235	3.388
6LU7_56924746_uff_E=397.29	-6.8	0	0
6LU7_25171849_uff_E=574.34	-6.8	8.241	4.237
6LU7_139588134_uff_E=457.99	-6.8	0	0
6LU7_57397526_uff_E=321.86	-6.8	5.877	2.273
6LU7_57393956_uff_E=482.31	-6.8	6.692	2.392
6LU7_57393956_uff_E=482.31	-6.8	7.186	2.538
6LU7_44139586_uff_E=530.12	-6.8	5.732	2.628
6LU7_44139586_uff_E=530.12	-6.8	8.281	4.295
6LU7_25171636_uff_E=493.57	-6.8	0	0
6LU7_298140_uff_E=400.18	-6.8	0	0
6LU7_154593892_uff_E=383.60	-6.8	0	0
6LU7_137467524_uff_E=386.34	-6.8	0	0
6LU7_137467524_uff_E=386.34	-6.8	6.13	2.256
6LU7_131975184_uff_E=547.56	-6.8	0	0
6LU7_123396595_uff_E=400.61	-6.8	0	0
6LU7_123282608_uff_E=523.14	-6.8	0	0
6LU7_118267046_uff_E=447.92	-6.8	0	0
6LU7_118267046_uff_E=447.92	-6.8	6.502	2.019
6LU7_118263264_uff_E=1066.87	-6.8	0	0
6LU7_118263250_uff_E=523.14	-6.8	0	0
6LU7_118263250_uff_E=523.14	-6.8	8.065	2.556
6LU7_118263246_uff_E=636.92	-6.8	0	0
6LU7_118263243_uff_E=326.16	-6.8	5.922	2.595
6LU7_118254219_uff_E=599.83	-6.8	0	0
6LU7_118254151_uff_E=635.34	-6.8	0	0
6LU7_118254121_uff_E=637.58	-6.8	0	0
6LU7_118254103_uff_E=631.96	-6.8	0	0
6LU7_118254099_uff_E=523.14	-6.8	0	0
6LU7_118254099_uff_E=523.14	-6.8	8.049	2.534
6LU7_73331347_uff_E=651.09	-6.8	8.613	5.726
6LU7_73331209_uff_E=661.60	-6.8	3.208	2.151
6LU7_71737790_uff_E=419.80	-6.8	0	0
6LU7_68727568_uff_E=497.72	-6.8	0	0
6LU7_57397525_uff_E=364.21	-6.8	0	0
6LU7_57397525_uff_E=364.21	-6.8	3.5	2.018
6LU7_46844082_uff_E=682.67	-6.8	9.144	3.049
6LU7_46844082_uff_E=682.67	-6.8	9.172	3.036
6LU7_46843963_uff_E=502.61	-6.8	0	0
6LU7_44139587_uff_E=1748.94	-6.8	0	0
6LU7_10407853_uff_E=504.30	-6.8	0	0
6LU7_10019062_uff_E=415.66	-6.8	0	0
6LU7_612127_uff_E=488.19	-6.8	0	0
6LU7_441140_uff_E=466.49	-6.7	0	0
6LU7_44565921_uff_E=420.30	-6.7	0	0
6LU7_44139588_uff_E=509.86	-6.7	6.084	3.444
6LU7_44139468_uff_E=480.55	-6.7	0	0
6LU7_6713927_uff_E=497.21	-6.7	0	0
6LU7_195522_uff_E=471.34	-6.7	0	0
6LU7_195522_uff_E=471.34	-6.7	3.471	1.927
6LU7_56950842_uff_E=522.07	-6.7	0	0
6LU7_44566031_uff_E=562.36	-6.7	0	0
6LU7_44565974_uff_E=433.18	-6.7	0	0
6LU7_25171849_uff_E=574.34	-6.7	8.296	4.23
6LU7_195521_uff_E=426.42	-6.7	0	0
6LU7_176431_uff_E=457.70	-6.7	0	0
6LU7_139588134_uff_E=457.99	-6.7	6.842	2.322
6LU7_131770040_uff_E=354.57	-6.7	0	0
6LU7_131770040_uff_E=354.57	-6.7	5.343	2.928
6LU7_56924747_uff_E=515.53	-6.7	0	0
6LU7_56924745_uff_E=399.54	-6.7	0	0
6LU7_44566078_uff_E=549.87	-6.7	0	0
6LU7_44139586_uff_E=530.12	-6.7	7.483	3.179
6LU7_153989287_uff_E=412.33	-6.7	0	0
6LU7_138514336_uff_E=331.78	-6.7	1.372	1.272
6LU7_138514336_uff_E=331.78	-6.7	5.274	3.49
6LU7_138514336_uff_E=331.78	-6.7	6.033	2.943
6LU7_138514334_uff_E=388.58	-6.7	7.406	4.165
6LU7_138496616_uff_E=483.72	-6.7	8.17	4.288
6LU7_138496616_uff_E=483.72	-6.7	4.546	3.605
6LU7_138490235_uff_E=829.78	-6.7	4.838	3.081
6LU7_137658162_uff_E=447.07	-6.7	0	0
6LU7_137647518_uff_E=469.45	-6.7	0	0
6LU7_137467528_uff_E=393.76	-6.7	6.104	2.228
6LU7_137467447_uff_E=315.96	-6.7	0	0
6LU7_137467368_uff_E=441.10	-6.7	0	0
6LU7_137467367_uff_E=372.94	-6.7	0	0
6LU7_137467367_uff_E=372.94	-6.7	6.508	2.107
6LU7_131975182_uff_E=561.17	-6.7	0	0
6LU7_118267096_uff_E=623.75	-6.7	0	0
6LU7_118267073_uff_E=557.12	-6.7	6.816	2.141
6LU7_118267042_uff_E=443.73	-6.7	0	0
6LU7_118263264_uff_E=1066.87	-6.7	6.203	2.794
6LU7_118263245_uff_E=614.68	-6.7	0	0
6LU7_118263237_uff_E=588.21	-6.7	7.444	2.486
6LU7_118254227_uff_E=641.19	-6.7	0	0
6LU7_118254216_uff_E=633.63	-6.7	8.848	2.73
6LU7_118254216_uff_E=633.63	-6.7	3.397	2.204
6LU7_118254216_uff_E=633.63	-6.7	8.735	2.527
6LU7_118254151_uff_E=635.34	-6.7	22.429	18.88
6LU7_118254131_uff_E=612.52	-6.7	19.956	16.568
6LU7_118254121_uff_E=637.58	-6.7	4.05	2.444
6LU7_118254103_uff_E=631.96	-6.7	7.653	2.814
6LU7_118207010_uff_E=1815.50	-6.7	6.145	2.201
6LU7_73331488_uff_E=637.67	-6.7	8.508	5.167
6LU7_73331348_uff_E=633.58	-6.7	4.034	2.727
6LU7_73331345_uff_E=668.75	-6.7	3.964	2.362
6LU7_73331345_uff_E=668.75	-6.7	6.176	3.7
6LU7_73331345_uff_E=668.75	-6.7	22.225	19.675
6LU7_73331060_uff_E=634.29	-6.7	3.736	2.331
6LU7_73330912_uff_E=647.29	-6.7	0	0
6LU7_71043635_uff_E=1668.80	-6.7	0	0
6LU7_71043635_uff_E=1668.80	-6.7	6.09	2.142
6LU7_71043635_uff_E=1668.80	-6.7	5.954	2.324
6LU7_70870984_uff_E=487.13	-6.7	0	0
6LU7_70870984_uff_E=487.13	-6.7	7.261	3.504
6LU7_57397525_uff_E=364.21	-6.7	5.959	2.388
6LU7_56950846_uff_E=485.31	-6.7	3.645	2.282
6LU7_46844023_uff_E=474.74	-6.7	0	0
6LU7_46844022_uff_E=503.08	-6.7	0	0
6LU7_44566075_uff_E=523.32	-6.7	4.26	2.329
6LU7_44566075_uff_E=523.32	-6.7	7.656	2.471
6LU7_44566068_uff_E=401.62	-6.7	3.798	1.923
6LU7_14565585_uff_E=471.35	-6.7	0	0
6LU7_14565585_uff_E=471.35	-6.7	3.468	1.919
6LU7_10097_uff_E=554.35	-6.7	6.464	2.547
6LU7_592609_uff_E=494.95	-6.7	0	0
6LU7_617713_uff_E=360.61	-6.7	3.162	1.956
6LU7_3512_uff_E=436.39	-6.6	0	0
6LU7_441140_uff_E=466.49	-6.6	6.71	2.778
6LU7_25171633_uff_E=466.90	-6.6	0	0
6LU7_978395_uff_E=436.39	-6.6	0	0
6LU7_25172057_uff_E=459.89	-6.6	5.454	3.1
6LU7_21677661_uff_E=485.34	-6.6	6.491	2.558
6LU7_21677661_uff_E=485.34	-6.6	6.654	3.529
6LU7_5702061_uff_E=436.39	-6.6	0	0
6LU7_5126442_uff_E=412.73	-6.6	0	0
6LU7_5126442_uff_E=412.73	-6.6	6.328	2.285
6LU7_118207067_uff_E=773.99	-6.6	0	0
6LU7_56950842_uff_E=522.07	-6.6	6.275	2.95
6LU7_44566031_uff_E=562.36	-6.6	6.031	3.194
6LU7_25171849_uff_E=574.34	-6.6	7.128	4.539
6LU7_6452395_uff_E=485.14	-6.6	6.029	2.413
6LU7_195521_uff_E=426.42	-6.6	3.488	1.85
6LU7_118263273_uff_E=1882.98	-6.6	0	0
6LU7_118263273_uff_E=1882.98	-6.6	5.133	2.715
6LU7_57397526_uff_E=321.86	-6.6	5.886	2.243
6LU7_57397526_uff_E=321.86	-6.6	2.042	1.818
6LU7_57395698_uff_E=490.56	-6.6	0	0
6LU7_56950845_uff_E=553.08	-6.6	3.287	2.237
6LU7_44566076_uff_E=484.63	-6.6	0	0
6LU7_44139586_uff_E=530.12	-6.6	7.42	3.22
6LU7_6604225_uff_E=488.78	-6.6	0	0
6LU7_941385_uff_E=474.79	-6.6	0	0
6LU7_153989287_uff_E=412.33	-6.6	3.888	2.19
6LU7_142550524_uff_E=360.94	-6.6	0	0
6LU7_138496616_uff_E=483.72	-6.6	4.241	2.659
6LU7_138496616_uff_E=483.72	-6.6	8.237	4.218
6LU7_137467528_uff_E=393.76	-6.6	6.149	2.18
6LU7_137467528_uff_E=393.76	-6.6	6.103	2.168
6LU7_137467524_uff_E=386.34	-6.6	6.156	2.296
6LU7_137467447_uff_E=315.96	-6.6	5.916	2.435
6LU7_137467381_uff_E=489.66	-6.6	4.164	2.437
6LU7_131964498_uff_E=431.93	-6.6	0	0
6LU7_131964498_uff_E=431.93	-6.6	7.233	2.158
6LU7_131964492_uff_E=498.10	-6.6	0	0
6LU7_124024037_uff_E=377.64	-6.6	0	0
6LU7_123846923_uff_E=605.00	-6.6	7.094	2.973
6LU7_123836216_uff_E=631.96	-6.6	3.168	2.448
6LU7_123825667_uff_E=368.14	-6.6	6.242	2.27
6LU7_118267097_uff_E=473.76	-6.6	0	0
6LU7_118267049_uff_E=466.20	-6.6	0	0
6LU7_118267045_uff_E=475.47	-6.6	0	0
6LU7_118263272_uff_E=1079.99	-6.6	0	0
6LU7_118263269_uff_E=1102.50	-6.6	7.229	2.799
6LU7_118263248_uff_E=603.75	-6.6	6.914	2.702
6LU7_118263241_uff_E=578.46	-6.6	3.909	2.356
6LU7_118263233_uff_E=562.91	-6.6	4.69	2.757
6LU7_118263228_uff_E=472.25	-6.6	4.567	2.438
6LU7_118263228_uff_E=472.25	-6.6	6.929	3.097
6LU7_118254216_uff_E=633.63	-6.6	22.138	19.124
6LU7_118254214_uff_E=630.93	-6.6	8.36	5.464
6LU7_118207010_uff_E=1815.50	-6.6	3.425	1.948
6LU7_90958864_uff_E=541.66	-6.6	0	0
6LU7_89798228_uff_E=373.07	-6.6	0	0
6LU7_73331348_uff_E=633.58	-6.6	22.46	19.895
6LU7_73331348_uff_E=633.58	-6.6	6.661	3.042
6LU7_73331345_uff_E=668.75	-6.6	6.754	3.076
6LU7_73331345_uff_E=668.75	-6.6	2.356	1.703
6LU7_73331344_uff_E=637.78	-6.6	22.324	19.472
6LU7_73331344_uff_E=637.78	-6.6	8.863	3.327
6LU7_73331344_uff_E=637.78	-6.6	3.469	2.244
6LU7_73331209_uff_E=661.60	-6.6	8.803	3.256
6LU7_71737790_uff_E=419.80	-6.6	6.851	2.965
6LU7_46844079_uff_E=544.43	-6.6	0	0
6LU7_46844023_uff_E=474.74	-6.6	6.271	3.383
6LU7_46843961_uff_E=566.24	-6.6	0	0
6LU7_46843899_uff_E=466.21	-6.6	0	0
6LU7_44139587_uff_E=1748.94	-6.6	3.447	2.302
6LU7_14565581_uff_E=465.26	-6.6	0	0
6LU7_14565581_uff_E=465.26	-6.6	3.348	1.96
6LU7_10019062_uff_E=415.66	-6.6	6.383	4.163
6LU7_10097_uff_E=554.35	-6.6	6.488	3.324
6LU7_566721_uff_E=474.85	-6.6	6.179	2.373
6LU7_566721_uff_E=474.85	-6.6	1.982	1.678
6LU7_592609_uff_E=494.95	-6.6	6.492	1.895
6LU7_71317160_uff_E=364.50	-6.5	6.123	2.146
6LU7_44139588_uff_E=509.86	-6.5	6.783	2.201
6LU7_44139588_uff_E=509.86	-6.5	3.144	2.326
6LU7_44139468_uff_E=480.55	-6.5	5.823	2.113
6LU7_57392201_uff_E=381.98	-6.5	0	0
6LU7_56950843_uff_E=482.15	-6.5	0	0
6LU7_46843964_uff_E=523.87	-6.5	0	0
6LU7_44565974_uff_E=433.18	-6.5	6.762	2.843
6LU7_44565973_uff_E=439.63	-6.5	0	0
6LU7_25171634_uff_E=425.00	-6.5	0	0
6LU7_15086460_uff_E=467.63	-6.5	6.074	2.215
6LU7_6452395_uff_E=485.14	-6.5	4.009	3
6LU7_139584816_uff_E=463.51	-6.5	0	0
6LU7_137652147_uff_E=534.82	-6.5	0	0
6LU7_127053184_uff_E=568.68	-6.5	0	0
6LU7_76973812_uff_E=262.34	-6.5	0	0
6LU7_57395698_uff_E=490.56	-6.5	2.992	2.241
6LU7_56950845_uff_E=553.08	-6.5	3.084	2.061
6LU7_44566076_uff_E=484.63	-6.5	6.497	2.845
6LU7_14706665_uff_E=484.89	-6.5	0	0
6LU7_14706665_uff_E=484.89	-6.5	5.501	3.264
6LU7_630845_uff_E=373.54	-6.5	6.079	2.255
6LU7_298140_uff_E=400.18	-6.5	6.311	2.33
6LU7_31336_uff_E=499.84	-6.5	0	0
6LU7_153989287_uff_E=412.33	-6.5	6.363	2.564
6LU7_153989287_uff_E=412.33	-6.5	6.869	2.679
6LU7_142550537_uff_E=823.03	-6.5	4.3	3.047
6LU7_142550537_uff_E=823.03	-6.5	3.933	2.728
6LU7_138514334_uff_E=388.58	-6.5	7.102	4.251
6LU7_138490235_uff_E=829.78	-6.5	6.647	3.588
6LU7_138490235_uff_E=829.78	-6.5	4.285	2.291
6LU7_129010273_uff_E=436.64	-6.5	0	0
6LU7_124024037_uff_E=377.64	-6.5	20.788	18.672
6LU7_123836216_uff_E=631.96	-6.5	4.09	2.494
6LU7_123825667_uff_E=368.14	-6.5	3.313	2.298
6LU7_118267131_uff_E=382.54	-6.5	0	0
6LU7_118267052_uff_E=464.23	-6.5	6.865	2.71
6LU7_118267049_uff_E=466.20	-6.5	6.46	2.015
6LU7_118267045_uff_E=475.47	-6.5	6.406	1.985
6LU7_118267042_uff_E=443.73	-6.5	6.597	2.687
6LU7_118263264_uff_E=1066.87	-6.5	4.14	2.041
6LU7_118263248_uff_E=603.75	-6.5	6.851	2.995
6LU7_118263243_uff_E=326.16	-6.5	3.991	2.641
6LU7_118263242_uff_E=1835.61	-6.5	0	0
6LU7_118263228_uff_E=472.25	-6.5	6.633	2.1
6LU7_118254246_uff_E=635.83	-6.5	0	0
6LU7_118254232_uff_E=631.91	-6.5	3.76	2.342
6LU7_118254232_uff_E=631.91	-6.5	6.664	3.007
6LU7_118254214_uff_E=630.93	-6.5	2.92	2.218
6LU7_118254190_uff_E=511.99	-6.5	7.234	4.415
6LU7_118254182_uff_E=641.96	-6.5	6.822	2.077
6LU7_118254179_uff_E=699.45	-6.5	0	0
6LU7_118254145_uff_E=558.28	-6.5	4.301	2.607
6LU7_118254145_uff_E=558.28	-6.5	3.227	2.685
6LU7_118254142_uff_E=558.28	-6.5	3.21	2.681
6LU7_118254131_uff_E=612.52	-6.5	1.232	1.108
6LU7_118254103_uff_E=631.96	-6.5	8.11	3.514
6LU7_91820110_uff_E=337.73	-6.5	0	0
6LU7_91820110_uff_E=337.73	-6.5	6.729	2.714
6LU7_75218864_uff_E=499.12	-6.5	7.632	4.19
6LU7_75218864_uff_E=499.12	-6.5	9.479	5.417
6LU7_73331491_uff_E=631.59	-6.5	3.769	2.263
6LU7_73331488_uff_E=637.67	-6.5	7.476	4.099
6LU7_73331487_uff_E=640.93	-6.5	8.399	4.577
6LU7_73331348_uff_E=633.58	-6.5	6.802	2.68
6LU7_73331347_uff_E=651.09	-6.5	6.873	3.886
6LU7_73331346_uff_E=611.27	-6.5	4.988	3.048
6LU7_73331209_uff_E=661.60	-6.5	22.187	19.308
6LU7_73331208_uff_E=661.17	-6.5	8.741	4.822
6LU7_73330764_uff_E=710.57	-6.5	0	0
6LU7_73330763_uff_E=714.76	-6.5	4.979	2.53
6LU7_71043635_uff_E=1668.80	-6.5	6.137	2.353
6LU7_70876805_uff_E=498.65	-6.5	6.918	4.298
6LU7_70870984_uff_E=487.13	-6.5	3.88	2.57
6LU7_68727568_uff_E=497.72	-6.5	6.493	1.88
6LU7_57390407_uff_E=486.36	-6.5	6.757	2.689
6LU7_46843965_uff_E=501.88	-6.5	0	0
6LU7_46843962_uff_E=816.62	-6.5	0	0
6LU7_46843899_uff_E=466.21	-6.5	5.774	2.526
6LU7_23955821_uff_E=351.99	-6.5	3.465	2.011
6LU7_14737140_uff_E=464.56	-6.5	0	0
6LU7_14565581_uff_E=465.26	-6.5	6.081	2.188
6LU7_978391_uff_E=427.59	-6.5	0	0
6LU7_574586_uff_E=496.46	-6.5	6.706	1.956
6LU7_574586_uff_E=496.46	-6.5	6.595	2.178
6LU7_586839_uff_E=882.59	-6.5	0	0
6LU7_617268_uff_E=361.47	-6.5	3.207	1.989
6LU7_44565921_uff_E=420.30	-6.4	6.863	2.898
6LU7_9974417_uff_E=422.04	-6.4	6.307	4.172
6LU7_9974417_uff_E=422.04	-6.4	6.737	3.271
6LU7_44566065_uff_E=441.34	-6.4	0	0
6LU7_44566065_uff_E=441.34	-6.4	6.611	3.5
6LU7_44139468_uff_E=480.55	-6.4	6.854	3.055
6LU7_21677661_uff_E=485.34	-6.4	6.149	2.226
6LU7_57392201_uff_E=381.98	-6.4	4.605	2.403
6LU7_56950843_uff_E=482.15	-6.4	4.629	2.341
6LU7_56950842_uff_E=522.07	-6.4	7.174	3.43
6LU7_56950842_uff_E=522.07	-6.4	5.186	1.945
6LU7_46843964_uff_E=523.87	-6.4	5.939	2.158
6LU7_44139589_uff_E=599.15	-6.4	0	0
6LU7_25171847_uff_E=476.88	-6.4	0	0
6LU7_6452395_uff_E=485.14	-6.4	3.563	2.668
6LU7_195521_uff_E=426.42	-6.4	6.097	2.399
6LU7_139584816_uff_E=463.51	-6.4	6.133	2.494
6LU7_137652147_uff_E=534.82	-6.4	6.18	2.192
6LU7_137652147_uff_E=534.82	-6.4	6.2	2.918
6LU7_76973812_uff_E=262.34	-6.4	6.689	2.463
6LU7_44566064_uff_E=432.11	-6.4	0	0
6LU7_44139590_uff_E=680.31	-6.4	4.337	2.941
6LU7_44139586_uff_E=530.12	-6.4	9.26	5.497
6LU7_44139586_uff_E=530.12	-6.4	21.844	19.213
6LU7_298140_uff_E=400.18	-6.4	5.855	2.441
6LU7_31336_uff_E=499.84	-6.4	6.248	1.828
6LU7_142550537_uff_E=823.03	-6.4	8.064	4.051
6LU7_138514463_uff_E=391.15	-6.4	2.76	2.44
6LU7_138514334_uff_E=388.58	-6.4	7.065	4.805
6LU7_137647518_uff_E=469.45	-6.4	6.67	2.647
6LU7_137467447_uff_E=315.96	-6.4	5.897	2.415
6LU7_137467397_uff_E=418.62	-6.4	0	0
6LU7_137467368_uff_E=441.10	-6.4	7.02	2.385
6LU7_137467367_uff_E=372.94	-6.4	3.256	2.023
6LU7_135027778_uff_E=580.27	-6.4	0	0
6LU7_135027778_uff_E=580.27	-6.4	7.409	2.932
6LU7_131975182_uff_E=561.17	-6.4	4.54	2.502
6LU7_131964505_uff_E=399.09	-6.4	0	0
6LU7_124024037_uff_E=377.64	-6.4	3.531	2.441
6LU7_123846923_uff_E=605.00	-6.4	7.145	3.199
6LU7_123704177_uff_E=624.00	-6.4	2.046	1.763
6LU7_123214764_uff_E=687.85	-6.4	0	0
6LU7_118267073_uff_E=557.12	-6.4	6.463	2.854
6LU7_118267042_uff_E=443.73	-6.4	4.364	2.231
6LU7_118263251_uff_E=515.77	-6.4	0	0
6LU7_118263250_uff_E=523.14	-6.4	7.601	2.294
6LU7_118263245_uff_E=614.68	-6.4	7.331	2.586
6LU7_118263242_uff_E=1835.61	-6.4	3.698	2.159
6LU7_118263231_uff_E=574.80	-6.4	6.863	2.408
6LU7_118263228_uff_E=472.25	-6.4	6.836	3.96
6LU7_118254214_uff_E=630.93	-6.4	4.018	2.564
6LU7_118254214_uff_E=630.93	-6.4	19.733	16.363
6LU7_118254179_uff_E=699.45	-6.4	5.811	2.63
6LU7_118254131_uff_E=612.52	-6.4	7.812	2.72
6LU7_91109362_uff_E=525.20	-6.4	0	0
6LU7_91035900_uff_E=505.87	-6.4	0	0
6LU7_90958864_uff_E=541.66	-6.4	4.801	2.417
6LU7_90958864_uff_E=541.66	-6.4	7.974	4.536
6LU7_89798228_uff_E=373.07	-6.4	4.817	2.602
6LU7_75218864_uff_E=499.12	-6.4	5.997	3.05
6LU7_73331491_uff_E=631.59	-6.4	22.75	20.511
6LU7_73331488_uff_E=637.67	-6.4	7.421	4.087
6LU7_73331488_uff_E=637.67	-6.4	19.67	17.129
6LU7_73331349_uff_E=627.67	-6.4	6.289	3.139
6LU7_73331345_uff_E=668.75	-6.4	6.849	2.888
6LU7_73331344_uff_E=637.78	-6.4	9.041	3.521
6LU7_73331344_uff_E=637.78	-6.4	10.068	6.751
6LU7_73331208_uff_E=661.17	-6.4	4.807	3.28
6LU7_73331205_uff_E=629.44	-6.4	7.097	2.358
6LU7_73331060_uff_E=634.29	-6.4	8.099	3.302
6LU7_73330766_uff_E=651.99	-6.4	8.555	2.988
6LU7_73330762_uff_E=621.15	-6.4	9.005	4.043
6LU7_73330625_uff_E=631.30	-6.4	7.975	4.531
6LU7_70876805_uff_E=498.65	-6.4	8.074	4.814
6LU7_70658189_uff_E=385.06	-6.4	0	0
6LU7_57390407_uff_E=486.36	-6.4	2.774	2.086
6LU7_57390407_uff_E=486.36	-6.4	6.301	2.375
6LU7_56950846_uff_E=485.31	-6.4	5.018	3.41
6LU7_46844079_uff_E=544.43	-6.4	6.748	3.464
6LU7_46844023_uff_E=474.74	-6.4	5.749	2.473
6LU7_46844023_uff_E=474.74	-6.4	6.826	3.399
6LU7_46844022_uff_E=503.08	-6.4	6.652	2.956
6LU7_46843962_uff_E=816.62	-6.4	5.342	3.251
6LU7_46843961_uff_E=566.24	-6.4	6.853	3.213
6LU7_44566051_uff_E=374.99	-6.4	0	0
6LU7_14565585_uff_E=471.35	-6.4	6.306	2.009
6LU7_13735050_uff_E=749.67	-6.4	0	0
6LU7_978391_uff_E=427.59	-6.4	5.973	2.056
6LU7_611914_uff_E=389.12	-6.4	0	0
6LU7_10097_uff_E=554.35	-6.4	2.347	1.873
6LU7_586858_uff_E=517.53	-6.4	0	0
6LU7_441140_uff_E=466.49	-6.3	4.928	2.634
6LU7_71317160_uff_E=364.50	-6.3	5.098	3.024
6LU7_44565921_uff_E=420.30	-6.3	6.041	3.521
6LU7_25171633_uff_E=466.90	-6.3	5.776	2.15
6LU7_3082005_uff_E=446.17	-6.3	0	0
6LU7_161302_uff_E=363.38	-6.3	5.782	1.985
6LU7_44566077_uff_E=490.23	-6.3	0	0
6LU7_44139468_uff_E=480.55	-6.3	6.186	2.994
6LU7_25172057_uff_E=459.89	-6.3	7.097	3.634
6LU7_6713927_uff_E=497.21	-6.3	3.931	2.178
6LU7_631655_uff_E=461.61	-6.3	0	0
6LU7_631655_uff_E=461.61	-6.3	3.694	1.897
6LU7_195522_uff_E=471.34	-6.3	6.248	2.029
6LU7_44139589_uff_E=599.15	-6.3	5.284	2.667
6LU7_44139589_uff_E=599.15	-6.3	7.553	2.846
6LU7_25171430_uff_E=1688.83	-6.3	0	0
6LU7_6452395_uff_E=485.14	-6.3	6.374	2.74
6LU7_127053185_uff_E=417.22	-6.3	0	0
6LU7_127053184_uff_E=568.68	-6.3	8.377	4.908
6LU7_57395698_uff_E=490.56	-6.3	4.843	2.893
6LU7_57393956_uff_E=482.31	-6.3	3.603	2.297
6LU7_56950845_uff_E=553.08	-6.3	9.263	3.216
6LU7_56950845_uff_E=553.08	-6.3	19.259	14.966
6LU7_56924747_uff_E=515.53	-6.3	22.614	19.266
6LU7_56924747_uff_E=515.53	-6.3	3.165	2.086
6LU7_56924745_uff_E=399.54	-6.3	6.288	2.332
6LU7_44148513_uff_E=442.54	-6.3	0	0
6LU7_44139590_uff_E=680.31	-6.3	7.338	2.953
6LU7_10761572_uff_E=428.30	-6.3	0	0
6LU7_6604225_uff_E=488.78	-6.3	3.657	1.925
6LU7_6604225_uff_E=488.78	-6.3	6.777	2.803
6LU7_153989287_uff_E=412.33	-6.3	6.294	2.142
6LU7_146559679_uff_E=391.25	-6.3	0	0
6LU7_144564145_uff_E=652.83	-6.3	0	0
6LU7_142550519_uff_E=411.61	-6.3	6.115	2.693
6LU7_138514465_uff_E=385.97	-6.3	3.103	1.858
6LU7_138514334_uff_E=388.58	-6.3	2.794	2.417
6LU7_137467447_uff_E=315.96	-6.3	5.588	2.202
6LU7_137467447_uff_E=315.96	-6.3	5.846	2.098
6LU7_137467397_uff_E=418.62	-6.3	4.675	2.623
6LU7_137467397_uff_E=418.62	-6.3	2.976	1.872
6LU7_137467381_uff_E=489.66	-6.3	5.115	2.787
6LU7_137467367_uff_E=372.94	-6.3	6.687	2.591
6LU7_131975184_uff_E=547.56	-6.3	4.298	2.109
6LU7_131975184_uff_E=547.56	-6.3	4.529	2.35
6LU7_131975184_uff_E=547.56	-6.3	5.832	2.679
6LU7_124024037_uff_E=377.64	-6.3	6.553	2.797
6LU7_123396595_uff_E=400.61	-6.3	3.502	2.164
6LU7_123350254_uff_E=1809.62	-6.3	5.862	2.287
6LU7_118267131_uff_E=382.54	-6.3	6.268	2.128
6LU7_118267097_uff_E=473.76	-6.3	3.743	1.93
6LU7_118267097_uff_E=473.76	-6.3	2.444	2.048
6LU7_118267073_uff_E=557.12	-6.3	3.427	2.676
6LU7_118263269_uff_E=1102.50	-6.3	7.107	2.364
6LU7_118263264_uff_E=1066.87	-6.3	6.246	2.171
6LU7_118263233_uff_E=562.91	-6.3	7.43	4.204
6LU7_118263231_uff_E=574.80	-6.3	6.533	2.766
6LU7_118254232_uff_E=631.91	-6.3	23.165	21.007
6LU7_118254219_uff_E=599.83	-6.3	2.123	1.625
6LU7_118254216_uff_E=633.63	-6.3	8.806	2.902
6LU7_118254216_uff_E=633.63	-6.3	10.042	6.578
6LU7_118254214_uff_E=630.93	-6.3	4.47	3.253
6LU7_118254182_uff_E=641.96	-6.3	6.765	2.508
6LU7_118254151_uff_E=635.34	-6.3	9.952	6.616
6LU7_118254145_uff_E=558.28	-6.3	20.455	17.718
6LU7_118254142_uff_E=558.28	-6.3	20.454	17.724
6LU7_118254103_uff_E=631.96	-6.3	4.473	2.673
6LU7_91820110_uff_E=337.73	-6.3	6.365	2.725
6LU7_91820110_uff_E=337.73	-6.3	6.35	3.679
6LU7_91035900_uff_E=505.87	-6.3	1.878	1.116
6LU7_75218864_uff_E=499.12	-6.3	8.585	5.259
6LU7_75218824_uff_E=483.43	-6.3	4.296	2.208
6LU7_73331628_uff_E=624.00	-6.3	6.657	3.01
6LU7_73331490_uff_E=626.42	-6.3	5.315	3.313
6LU7_73331488_uff_E=637.67	-6.3	14.94	10.115
6LU7_73331487_uff_E=640.93	-6.3	4.062	2.614
6LU7_73331349_uff_E=627.67	-6.3	4.014	3.155
6LU7_73331348_uff_E=633.58	-6.3	7.384	3.693
6LU7_73331347_uff_E=651.09	-6.3	5.267	3.084
6LU7_73331347_uff_E=651.09	-6.3	4.498	3.065
6LU7_73331346_uff_E=611.27	-6.3	7.71	3.703
6LU7_73331345_uff_E=668.75	-6.3	7.634	4.018
6LU7_73331344_uff_E=637.78	-6.3	19.583	17.476
6LU7_73331208_uff_E=661.17	-6.3	9.768	6.26
6LU7_73331205_uff_E=629.44	-6.3	7.098	2.35
6LU7_73330763_uff_E=714.76	-6.3	10.478	7.974
6LU7_73330625_uff_E=631.30	-6.3	21.716	18.29
6LU7_70876805_uff_E=498.65	-6.3	7.078	3.572
6LU7_70870984_uff_E=487.13	-6.3	8.543	5.046
6LU7_70870984_uff_E=487.13	-6.3	7.859	4.534
6LU7_57397525_uff_E=364.21	-6.3	6.37	2.771
6LU7_46843899_uff_E=466.21	-6.3	6.193	2.907
6LU7_46843899_uff_E=466.21	-6.3	6.942	3.614
6LU7_44566051_uff_E=374.99	-6.3	6.717	3.132
6LU7_44139587_uff_E=1748.94	-6.3	8.75	3.925
6LU7_44139587_uff_E=1748.94	-6.3	5.091	2.775
6LU7_14737140_uff_E=464.56	-6.3	3.579	1.917
6LU7_14737140_uff_E=464.56	-6.3	6.525	2.471
6LU7_14565585_uff_E=471.35	-6.3	6.685	2.67
6LU7_13735050_uff_E=749.67	-6.3	19.309	15.477
6LU7_4125561_uff_E=421.60	-6.3	0	0
6LU7_611918_uff_E=475.46	-6.3	0	0
6LU7_10097_uff_E=554.35	-6.3	6.151	2.239
6LU7_566721_uff_E=474.85	-6.3	5.98	2.296
6LU7_586839_uff_E=882.59	-6.3	6.609	3.059
6LU7_617713_uff_E=360.61	-6.3	6.486	2.678
6LU7_71317160_uff_E=364.50	-6.2	3.71	2.278
6LU7_71317160_uff_E=364.50	-6.2	6.133	2.079
6LU7_25171633_uff_E=466.90	-6.2	6.753	2.974
6LU7_46844137_uff_E=493.79	-6.2	0	0
6LU7_46844024_uff_E=467.06	-6.2	0	0
6LU7_46844024_uff_E=467.06	-6.2	6.074	2.877
6LU7_44139468_uff_E=480.55	-6.2	7.008	2.915
6LU7_25172057_uff_E=459.89	-6.2	7.113	4.746
6LU7_5126442_uff_E=412.73	-6.2	6.131	2.055
6LU7_56950842_uff_E=522.07	-6.2	6.23	2.332
6LU7_46843964_uff_E=523.87	-6.2	6.893	3.218
6LU7_6452395_uff_E=485.14	-6.2	18.881	16.969
6LU7_6452395_uff_E=485.14	-6.2	5.809	2.425
6LU7_253250_uff_E=428.28	-6.2	0	0
6LU7_176431_uff_E=457.70	-6.2	6.186	1.989
6LU7_139588134_uff_E=457.99	-6.2	2.805	1.988
6LU7_139588134_uff_E=457.99	-6.2	3.296	1.888
6LU7_139584816_uff_E=463.51	-6.2	3.882	2.309
6LU7_131770040_uff_E=354.57	-6.2	4.593	2.813
6LU7_118263273_uff_E=1882.98	-6.2	3.683	1.987
6LU7_56924747_uff_E=515.53	-6.2	4.444	2.287
6LU7_56924745_uff_E=399.54	-6.2	2.411	2.023
6LU7_44566064_uff_E=432.11	-6.2	3.667	1.986
6LU7_44139590_uff_E=680.31	-6.2	4.027	2.527
6LU7_941385_uff_E=474.79	-6.2	6.259	2.158
6LU7_298140_uff_E=400.18	-6.2	3.559	2.071
6LU7_154593892_uff_E=383.60	-6.2	6.198	2.664
6LU7_153989287_uff_E=412.33	-6.2	6.821	2.605
6LU7_148240297_uff_E=338.09	-6.2	0	0
6LU7_148240297_uff_E=338.09	-6.2	3.462	1.034
6LU7_144564153_uff_E=641.96	-6.2	7.674	3.381
6LU7_142550538_uff_E=347.64	-6.2	3.229	2.512
6LU7_142550537_uff_E=823.03	-6.2	7.096	3.205
6LU7_142550537_uff_E=823.03	-6.2	8.057	3.728
6LU7_142550537_uff_E=823.03	-6.2	7.848	3.794
6LU7_138514465_uff_E=385.97	-6.2	6.664	2.187
6LU7_138514463_uff_E=391.15	-6.2	7.724	3.724
6LU7_138514336_uff_E=331.78	-6.2	5.743	3.145
6LU7_138514335_uff_E=406.05	-6.2	2.119	1.833
6LU7_138514335_uff_E=406.05	-6.2	6.017	3.195
6LU7_138514334_uff_E=388.58	-6.2	7.733	3.89
6LU7_138490235_uff_E=829.78	-6.2	7.369	3.709
6LU7_138490235_uff_E=829.78	-6.2	7.99	4.038
6LU7_137467528_uff_E=393.76	-6.2	4.432	2.777
6LU7_137467524_uff_E=386.34	-6.2	2.637	1.822
6LU7_137467524_uff_E=386.34	-6.2	2.763	1.767
6LU7_137467381_uff_E=489.66	-6.2	21.418	18.528
6LU7_131975182_uff_E=561.17	-6.2	7.837	2.557
6LU7_131964506_uff_E=573.49	-6.2	0	0
6LU7_131964498_uff_E=431.93	-6.2	4.276	2.549
6LU7_123846923_uff_E=605.00	-6.2	4.334	2.773
6LU7_123836216_uff_E=631.96	-6.2	7.115	2.925
6LU7_123350254_uff_E=1809.62	-6.2	3.553	2.117
6LU7_118267131_uff_E=382.54	-6.2	6.106	1.946
6LU7_118267073_uff_E=557.12	-6.2	5.968	3.177
6LU7_118263250_uff_E=523.14	-6.2	4.187	2.401
6LU7_118263244_uff_E=641.96	-6.2	6.76	2.496
6LU7_118263244_uff_E=641.96	-6.2	7.664	3.355
6LU7_118263242_uff_E=1835.61	-6.2	6.075	2.508
6LU7_118263233_uff_E=562.91	-6.2	6.729	3.01
6LU7_118263231_uff_E=574.80	-6.2	3.858	2.185
6LU7_118263231_uff_E=574.80	-6.2	1.994	1.925
6LU7_118254232_uff_E=631.91	-6.2	8.117	3.91
6LU7_118254216_uff_E=633.63	-6.2	19.797	17.561
6LU7_118254214_uff_E=630.93	-6.2	4.189	3.016
6LU7_118254190_uff_E=511.99	-6.2	6.645	3.003
6LU7_118254182_uff_E=641.96	-6.2	7.729	3.348
6LU7_118254182_uff_E=641.96	-6.2	7.264	3.643
6LU7_118254151_uff_E=635.34	-6.2	2.277	1.897
6LU7_118254145_uff_E=558.28	-6.2	21.045	18.282
6LU7_118254142_uff_E=558.28	-6.2	7.325	3.046
6LU7_118254131_uff_E=612.52	-6.2	2.022	1.541
6LU7_118254131_uff_E=612.52	-6.2	19.461	17.481
6LU7_118254121_uff_E=637.58	-6.2	22.765	20.438
6LU7_118254121_uff_E=637.58	-6.2	6.962	3.561
6LU7_90958864_uff_E=541.66	-6.2	7.192	3.467
6LU7_75218864_uff_E=499.12	-6.2	24.736	21.985
6LU7_75218864_uff_E=499.12	-6.2	10.589	7.129
6LU7_75218864_uff_E=499.12	-6.2	7.186	4.645
6LU7_73331488_uff_E=637.67	-6.2	7.849	4.558
6LU7_73331488_uff_E=637.67	-6.2	2.576	2.031
6LU7_73331487_uff_E=640.93	-6.2	19.77	16.776
6LU7_73331349_uff_E=627.67	-6.2	5.546	3.456
6LU7_73331349_uff_E=627.67	-6.2	22.901	20.05
6LU7_73331348_uff_E=633.58	-6.2	7.855	3.467
6LU7_73331347_uff_E=651.09	-6.2	4.915	3.088
6LU7_73331345_uff_E=668.75	-6.2	8.567	5.952
6LU7_73331209_uff_E=661.60	-6.2	10.158	6.639
6LU7_73331208_uff_E=661.17	-6.2	9.054	5.192
6LU7_73331205_uff_E=629.44	-6.2	4.826	3.167
6LU7_73330766_uff_E=651.99	-6.2	8.341	2.572
6LU7_73330764_uff_E=710.57	-6.2	8.67	3.813
6LU7_73330763_uff_E=714.76	-6.2	18.063	14.955
6LU7_71318420_uff_E=519.02	-6.2	0	0
6LU7_71318420_uff_E=519.02	-6.2	21.944	19.654
6LU7_71043635_uff_E=1668.80	-6.2	4.831	2.251
6LU7_71043635_uff_E=1668.80	-6.2	4.049	2.143
6LU7_68024713_uff_E=427.25	-6.2	0	0
6LU7_56950846_uff_E=485.31	-6.2	21.106	18.28
6LU7_46844083_uff_E=525.07	-6.2	0	0
6LU7_46844079_uff_E=544.43	-6.2	2.018	1.715
6LU7_46843965_uff_E=501.88	-6.2	5.986	2.71
6LU7_46843965_uff_E=501.88	-6.2	6.388	3.505
6LU7_46843963_uff_E=502.61	-6.2	6.483	2.882
6LU7_44566075_uff_E=523.32	-6.2	7.327	2.798
6LU7_44566051_uff_E=374.99	-6.2	6.509	4.346
6LU7_44139587_uff_E=1748.94	-6.2	4.712	3.156
6LU7_611914_uff_E=389.12	-6.2	6.023	2.003
6LU7_586858_uff_E=517.53	-6.2	6.72	3.299
6LU7_617268_uff_E=361.47	-6.2	7.311	3.528
6LU7_617713_uff_E=360.61	-6.2	6.276	2.338
6LU7_9974417_uff_E=422.04	-6.1	5.44	3.106
6LU7_9974417_uff_E=422.04	-6.1	6.433	3.074
6LU7_44139588_uff_E=509.86	-6.1	7.712	4.25
6LU7_44139468_uff_E=480.55	-6.1	6.542	2.243
6LU7_25172057_uff_E=459.89	-6.1	8.618	5.994
6LU7_25172057_uff_E=459.89	-6.1	6.391	3.853
6LU7_6713927_uff_E=497.21	-6.1	6.003	2.043
6LU7_5702061_uff_E=436.39	-6.1	3.895	2.074
6LU7_5126442_uff_E=412.73	-6.1	4.412	2.804
6LU7_195522_uff_E=471.34	-6.1	6.323	2.449
6LU7_118207067_uff_E=773.99	-6.1	3.925	2.372
6LU7_118207067_uff_E=773.99	-6.1	6.25	2.21
6LU7_56950843_uff_E=482.15	-6.1	5.82	2.07
6LU7_56924746_uff_E=397.29	-6.1	6.366	2.253
6LU7_46843964_uff_E=523.87	-6.1	5.938	2.662
6LU7_44566031_uff_E=562.36	-6.1	3.246	2.433
6LU7_25171426_uff_E=435.36	-6.1	0	0
6LU7_195521_uff_E=426.42	-6.1	6.748	2.376
6LU7_176431_uff_E=457.70	-6.1	3.584	2.053
6LU7_57395698_uff_E=490.56	-6.1	8.56	4.156
6LU7_57395698_uff_E=490.56	-6.1	4.366	2.87
6LU7_57393956_uff_E=482.31	-6.1	8.38	3.383
6LU7_56924747_uff_E=515.53	-6.1	3.476	2.202
6LU7_44148513_uff_E=442.54	-6.1	6.755	3.616
6LU7_6604225_uff_E=488.78	-6.1	4.866	2.639
6LU7_620368_uff_E=417.12	-6.1	0	0
6LU7_298140_uff_E=400.18	-6.1	5.493	2.066
6LU7_298140_uff_E=400.18	-6.1	2.165	1.869
6LU7_148240297_uff_E=338.09	-6.1	3.817	2.926
6LU7_147116578_uff_E=520.21	-6.1	21.471	18.428
6LU7_144564153_uff_E=641.96	-6.1	7.299	3.696
6LU7_144564145_uff_E=652.83	-6.1	6.637	2.671
6LU7_142550519_uff_E=411.61	-6.1	4.039	3.141
6LU7_138514465_uff_E=385.97	-6.1	7.56	2.284
6LU7_138514465_uff_E=385.97	-6.1	1.938	1.689
6LU7_138514465_uff_E=385.97	-6.1	6.548	2.704
6LU7_138496616_uff_E=483.72	-6.1	7.796	5.099
6LU7_138496616_uff_E=483.72	-6.1	8.529	5.4
6LU7_138490235_uff_E=829.78	-6.1	7.703	3.793
6LU7_138490235_uff_E=829.78	-6.1	7.574	3.74
6LU7_138490235_uff_E=829.78	-6.1	8.219	4.179
6LU7_137658162_uff_E=447.07	-6.1	6.27	2.406
6LU7_137658162_uff_E=447.07	-6.1	5.877	3.064
6LU7_137647518_uff_E=469.45	-6.1	6.34	4.05
6LU7_137647518_uff_E=469.45	-6.1	6.442	3.027
6LU7_137467381_uff_E=489.66	-6.1	6.928	2.659
6LU7_137467381_uff_E=489.66	-6.1	6.615	3.744
6LU7_137467367_uff_E=372.94	-6.1	3.44	2.698
6LU7_137467367_uff_E=372.94	-6.1	3.153	2.118
6LU7_123836216_uff_E=631.96	-6.1	4.021	2.987
6LU7_123836216_uff_E=631.96	-6.1	6.884	2.926
6LU7_123704177_uff_E=624.00	-6.1	7.734	3.398
6LU7_123396595_uff_E=400.61	-6.1	6.328	2.251
6LU7_123361815_uff_E=380.82	-6.1	6.221	2.173
6LU7_123350254_uff_E=1809.62	-6.1	3.845	2.656
6LU7_118267073_uff_E=557.12	-6.1	6.86	3.087
6LU7_118267046_uff_E=447.92	-6.1	7.112	2.999
6LU7_118267046_uff_E=447.92	-6.1	6.527	2.715
6LU7_118267045_uff_E=475.47	-6.1	6.391	2.277
6LU7_118263251_uff_E=515.77	-6.1	6.953	3.977
6LU7_118263251_uff_E=515.77	-6.1	7.2	3.673
6LU7_118263248_uff_E=603.75	-6.1	4.82	3.116
6LU7_118263247_uff_E=624.00	-6.1	7.643	3.37
6LU7_118263244_uff_E=641.96	-6.1	7.278	3.68
6LU7_118263244_uff_E=641.96	-6.1	6.638	1.945
6LU7_118263242_uff_E=1835.61	-6.1	2.015	1.771
6LU7_118263241_uff_E=578.46	-6.1	3.724	2.119
6LU7_118263237_uff_E=588.21	-6.1	3.18	2.353
6LU7_118263237_uff_E=588.21	-6.1	7.331	2.312
6LU7_118263231_uff_E=574.80	-6.1	20.809	17.757
6LU7_118263228_uff_E=472.25	-6.1	6.793	3.589
6LU7_118263228_uff_E=472.25	-6.1	6.685	2.087
6LU7_118254232_uff_E=631.91	-6.1	7.761	3.948
6LU7_118254179_uff_E=699.45	-6.1	6.69	3.129
6LU7_118254145_uff_E=558.28	-6.1	20.417	17.815
6LU7_118254142_uff_E=558.28	-6.1	20.418	17.825
6LU7_118254083_uff_E=620.90	-6.1	7.691	3.605
6LU7_118254083_uff_E=620.90	-6.1	7.701	3.283
6LU7_118207010_uff_E=1815.50	-6.1	6.557	2.565
6LU7_118207010_uff_E=1815.50	-6.1	3.299	2.525
6LU7_90958864_uff_E=541.66	-6.1	5.26	2.224
6LU7_75218825_uff_E=478.84	-6.1	0	0
6LU7_75218824_uff_E=483.43	-6.1	3.252	2.412
6LU7_73331491_uff_E=631.59	-6.1	8.046	3.549
6LU7_73331490_uff_E=626.42	-6.1	6.659	2.652
6LU7_73331349_uff_E=627.67	-6.1	17.829	13.86
6LU7_73331346_uff_E=611.27	-6.1	23.026	20.578
6LU7_73331209_uff_E=661.60	-6.1	9.642	3.545
6LU7_73331205_uff_E=629.44	-6.1	2.53	1.767
6LU7_73330910_uff_E=648.69	-6.1	7.44	2.907
6LU7_73330910_uff_E=648.69	-6.1	3.017	2.183
6LU7_73330766_uff_E=651.99	-6.1	8.803	3.6
6LU7_73330764_uff_E=710.57	-6.1	7.465	2.689
6LU7_73330625_uff_E=631.30	-6.1	3.888	2.373
6LU7_73330625_uff_E=631.30	-6.1	4.227	2.882
6LU7_71318420_uff_E=519.02	-6.1	6.832	3.314
6LU7_71318420_uff_E=519.02	-6.1	21.589	18.938
6LU7_70876805_uff_E=498.65	-6.1	8.667	5.772
6LU7_70876805_uff_E=498.65	-6.1	4.276	2.805
6LU7_70870984_uff_E=487.13	-6.1	22.93	20.058
6LU7_68727702_uff_E=407.12	-6.1	4.596	2.527
6LU7_68727568_uff_E=497.72	-6.1	6.368	2.361
6LU7_68024713_uff_E=427.25	-6.1	6.547	2.547
6LU7_68024713_uff_E=427.25	-6.1	4.245	2.629
6LU7_68024713_uff_E=427.25	-6.1	6.033	3.512
6LU7_68024713_uff_E=427.25	-6.1	5.548	2.177
6LU7_57390407_uff_E=486.36	-6.1	6.858	2.054
6LU7_46844083_uff_E=525.07	-6.1	6.912	2.581
6LU7_46844079_uff_E=544.43	-6.1	23.45	20.027
6LU7_46844023_uff_E=474.74	-6.1	6.525	2.835
6LU7_46843965_uff_E=501.88	-6.1	5.314	2.502
6LU7_46843963_uff_E=502.61	-6.1	5.59	2.276
6LU7_46843899_uff_E=466.21	-6.1	7.038	3.489
6LU7_44566075_uff_E=523.32	-6.1	5.861	3.268
6LU7_44566075_uff_E=523.32	-6.1	21.433	18.457
6LU7_44566075_uff_E=523.32	-6.1	7.503	2.619
6LU7_44139587_uff_E=1748.94	-6.1	8.477	3.961
6LU7_44139587_uff_E=1748.94	-6.1	8.597	4.326
6LU7_14565585_uff_E=471.35	-6.1	6.354	2.517
6LU7_13735050_uff_E=749.67	-6.1	6.194	3.406
6LU7_13735050_uff_E=749.67	-6.1	4.177	2.87
6LU7_10019062_uff_E=415.66	-6.1	6.032	4.066
6LU7_612127_uff_E=488.19	-6.1	6.523	2.567
6LU7_611914_uff_E=389.12	-6.1	3.861	2.47
6LU7_611914_uff_E=389.12	-6.1	6.353	2.586
6LU7_10097_uff_E=554.35	-6.1	6.452	1.991
6LU7_574586_uff_E=496.46	-6.1	4.478	2.805
6LU7_586858_uff_E=517.53	-6.1	1.727	1.69
6LU7_586858_uff_E=517.53	-6.1	6.271	2.672
6LU7_617713_uff_E=360.61	-6.1	2.863	2.628
6LU7_3512_uff_E=436.39	-6	6.12	2.006
6LU7_441140_uff_E=466.49	-6	3.707	1.97
6LU7_441140_uff_E=466.49	-6	6.464	4.089
6LU7_44565921_uff_E=420.30	-6	6.413	2.757
6LU7_9974417_uff_E=422.04	-6	6.068	1.837
6LU7_3082005_uff_E=446.17	-6	5.512	3.095
6LU7_3082005_uff_E=446.17	-6	4.423	2.649
6LU7_3082005_uff_E=446.17	-6	6.332	2.229
6LU7_978395_uff_E=436.39	-6	6.119	1.968
6LU7_46844137_uff_E=493.79	-6	5.492	2.466
6LU7_46844137_uff_E=493.79	-6	5.04	2.861
6LU7_46844137_uff_E=493.79	-6	6.923	3.73
6LU7_46844024_uff_E=467.06	-6	4.798	2.772
6LU7_44139588_uff_E=509.86	-6	6.304	2.557
6LU7_21677661_uff_E=485.34	-6	6.451	2.001
6LU7_5702061_uff_E=436.39	-6	6.139	2.035
6LU7_5126442_uff_E=412.73	-6	6.604	2.776
6LU7_631655_uff_E=461.61	-6	6.757	2.712
6LU7_118207067_uff_E=773.99	-6	6.417	3.303
6LU7_57392201_uff_E=381.98	-6	6.757	2.491
6LU7_56950843_uff_E=482.15	-6	5.178	2.295
6LU7_44566031_uff_E=562.36	-6	7.197	4.283
6LU7_44566031_uff_E=562.36	-6	6.402	2.783
6LU7_44139589_uff_E=599.15	-6	5.214	2.935
6LU7_25171847_uff_E=476.88	-6	6.767	2.358
6LU7_25171635_uff_E=456.32	-6	0	0
6LU7_25171632_uff_E=683.46	-6	0	0
6LU7_6452395_uff_E=485.14	-6	6.886	3.563
6LU7_176431_uff_E=457.70	-6	6.128	2.098
6LU7_137652147_uff_E=534.82	-6	23.283	19.921
6LU7_131770040_uff_E=354.57	-6	4.323	2.667
6LU7_127053185_uff_E=417.22	-6	5.286	3.185
6LU7_127053184_uff_E=568.68	-6	5.642	3.112
6LU7_76973812_uff_E=262.34	-6	6.115	2.839
6LU7_57397526_uff_E=321.86	-6	6.048	3.668
6LU7_56924747_uff_E=515.53	-6	4.974	2.892
6LU7_56924747_uff_E=515.53	-6	7.702	3.19
6LU7_56924747_uff_E=515.53	-6	5.848	3.255
6LU7_44566076_uff_E=484.63	-6	7.022	3.289
6LU7_44148513_uff_E=442.54	-6	3.77	1.981
6LU7_25171636_uff_E=493.57	-6	3.233	2.513
6LU7_941385_uff_E=474.79	-6	7.023	4.678
6LU7_630845_uff_E=373.54	-6	3.894	2.93
6LU7_630845_uff_E=373.54	-6	6.089	2.303
6LU7_620368_uff_E=417.12	-6	6.381	2.561
6LU7_154388188_uff_E=342.57	-6	0	0
6LU7_153989287_uff_E=412.33	-6	3.816	2.037
6LU7_148240297_uff_E=338.09	-6	3.458	2.566
6LU7_146559679_uff_E=391.25	-6	7.003	2.25
6LU7_144564153_uff_E=641.96	-6	7.829	3.693
6LU7_142550538_uff_E=347.64	-6	6.995	3.994
6LU7_142550538_uff_E=347.64	-6	6.115	2.956
6LU7_142550524_uff_E=360.94	-6	6.345	2.655
6LU7_142550524_uff_E=360.94	-6	3.858	2.164
6LU7_138514336_uff_E=331.78	-6	5.86	2.572
6LU7_138514334_uff_E=388.58	-6	7.393	3.277
6LU7_138514334_uff_E=388.58	-6	7.322	3.812
6LU7_137658162_uff_E=447.07	-6	6.502	2.746
6LU7_137647518_uff_E=469.45	-6	4.593	2.537
6LU7_137467528_uff_E=393.76	-6	18.863	16.59
6LU7_137467381_uff_E=489.66	-6	21.417	18.019
6LU7_137467381_uff_E=489.66	-6	7.145	4.118
6LU7_137467368_uff_E=441.10	-6	6.693	3.075
6LU7_131975184_uff_E=547.56	-6	2.358	1.692
6LU7_131964506_uff_E=573.49	-6	6.708	2.454
6LU7_131964505_uff_E=399.09	-6	6.484	2.034
6LU7_131964492_uff_E=498.10	-6	1.711	1.473
6LU7_131964492_uff_E=498.10	-6	20.414	16.883
6LU7_129010273_uff_E=436.64	-6	6.107	1.94
6LU7_123872201_uff_E=1875.00	-6	0	0
6LU7_123836216_uff_E=631.96	-6	8.487	4.451
6LU7_123361815_uff_E=380.82	-6	6.285	2.776
6LU7_123282608_uff_E=523.14	-6	7.728	2.539
6LU7_118267097_uff_E=473.76	-6	6.379	2.423
6LU7_118267096_uff_E=623.75	-6	2.494	2.158
6LU7_118267096_uff_E=623.75	-6	21.169	17.846
6LU7_118267073_uff_E=557.12	-6	7.314	4.708
6LU7_118267049_uff_E=466.20	-6	2.957	2.414
6LU7_118267045_uff_E=475.47	-6	4.423	2.764
6LU7_118263251_uff_E=515.77	-6	5.064	2.631
6LU7_118263245_uff_E=614.68	-6	3.25	2.497
6LU7_118263244_uff_E=641.96	-6	7.78	3.697
6LU7_118263243_uff_E=326.16	-6	5.561	2.646
6LU7_118263242_uff_E=1835.61	-6	5.656	1.98
6LU7_118263237_uff_E=588.21	-6	3.768	2.32
6LU7_118263233_uff_E=562.91	-6	4.706	2.352
6LU7_118263231_uff_E=574.80	-6	20.049	17.538
6LU7_118263231_uff_E=574.80	-6	20.466	17.679
6LU7_118263231_uff_E=574.80	-6	6.776	1.981
6LU7_118263228_uff_E=472.25	-6	5.328	3.466
6LU7_118254232_uff_E=631.91	-6	6.422	3.191
6LU7_118254227_uff_E=641.19	-6	6.735	2.677
6LU7_118254214_uff_E=630.93	-6	16.337	15.03
6LU7_118254190_uff_E=511.99	-6	6.547	2.708
6LU7_118254182_uff_E=641.96	-6	7.813	3.667
6LU7_118254179_uff_E=699.45	-6	9.098	4.49
6LU7_118254103_uff_E=631.96	-6	2.905	1.989
6LU7_118254103_uff_E=631.96	-6	8.685	5.183
6LU7_118207010_uff_E=1815.50	-6	7.262	3.035
6LU7_91564943_uff_E=503.49	-6	0	0
6LU7_91035900_uff_E=505.87	-6	8.023	4.393
6LU7_90958864_uff_E=541.66	-6	7.196	3.475
6LU7_90958864_uff_E=541.66	-6	7.647	3.962
6LU7_73331628_uff_E=624.00	-6	7.713	3.38
6LU7_73331487_uff_E=640.93	-6	10.307	6.999
6LU7_73331487_uff_E=640.93	-6	2.493	1.794
6LU7_73331349_uff_E=627.67	-6	8.162	5.113
6LU7_73331348_uff_E=633.58	-6	7.776	3.738
6LU7_73331347_uff_E=651.09	-6	19.448	16.284
6LU7_73331346_uff_E=611.27	-6	8.673	5.567
6LU7_73331209_uff_E=661.60	-6	4.196	2.513
6LU7_73331209_uff_E=661.60	-6	19.624	15.773
6LU7_73331208_uff_E=661.17	-6	18.485	16.919
6LU7_73331208_uff_E=661.17	-6	3.821	2.091
6LU7_73331205_uff_E=629.44	-6	15.785	12.405
6LU7_73331060_uff_E=634.29	-6	20.024	16.953
6LU7_73330911_uff_E=636.92	-6	7.856	2.677
6LU7_73330766_uff_E=651.99	-6	3.949	2.617
6LU7_73330625_uff_E=631.30	-6	19.574	15.989
6LU7_71318422_uff_E=595.64	-6	0	0
6LU7_68727568_uff_E=497.72	-6	3.267	2.51
6LU7_68024713_uff_E=427.25	-6	5.83	2.957
6LU7_57397525_uff_E=364.21	-6	20.631	17.756
6LU7_57397525_uff_E=364.21	-6	6.128	2.228
6LU7_57390407_uff_E=486.36	-6	5.288	3.398
6LU7_56950846_uff_E=485.31	-6	18.91	15.431
6LU7_46844083_uff_E=525.07	-6	5.187	2.36
6LU7_46844023_uff_E=474.74	-6	5.462	2.386
6LU7_46844023_uff_E=474.74	-6	7.213	4.406
6LU7_46843965_uff_E=501.88	-6	7.08	4.271
6LU7_46843965_uff_E=501.88	-6	7.158	3.874
6LU7_46843962_uff_E=816.62	-6	7.066	3.744
6LU7_46843899_uff_E=466.21	-6	7.194	4.379
6LU7_46843899_uff_E=466.21	-6	5.348	2.373
6LU7_44566068_uff_E=401.62	-6	2.497	2.176
6LU7_44566051_uff_E=374.99	-6	3.748	1.988
6LU7_23955821_uff_E=351.99	-6	2.747	2.459
6LU7_14737140_uff_E=464.56	-6	3.651	2.716
6LU7_14737140_uff_E=464.56	-6	7.069	2.77
6LU7_14565581_uff_E=465.26	-6	3.724	2.256
6LU7_13735050_uff_E=749.67	-6	8.801	4.062
6LU7_586858_uff_E=517.53	-6	6.545	2.914
6LU7_592609_uff_E=494.95	-6	3.285	2.493
6LU7_617713_uff_E=360.61	-6	7.287	3.674
6LU7_3512_uff_E=436.39	-5.9	6.487	2.576
6LU7_441140_uff_E=466.49	-5.9	6.43	2.821
6LU7_71317160_uff_E=364.50	-5.9	6.213	2.58
6LU7_25171633_uff_E=466.90	-5.9	6.465	2.196
6LU7_9974417_uff_E=422.04	-5.9	5.948	2.251
6LU7_978395_uff_E=436.39	-5.9	6.475	2.567
6LU7_161302_uff_E=363.38	-5.9	6.155	2.406
6LU7_161302_uff_E=363.38	-5.9	6.151	2.524
6LU7_44566065_uff_E=441.34	-5.9	6.676	4.352
6LU7_44566065_uff_E=441.34	-5.9	4.61	2.742
6LU7_44139468_uff_E=480.55	-5.9	23.681	20.13
6LU7_25172057_uff_E=459.89	-5.9	8.323	4.872
6LU7_25172057_uff_E=459.89	-5.9	7.084	5.275
6LU7_21677661_uff_E=485.34	-5.9	4.756	2.704
6LU7_21677661_uff_E=485.34	-5.9	5.177	3.267
6LU7_5702061_uff_E=436.39	-5.9	6.499	2.605
6LU7_5702061_uff_E=436.39	-5.9	6.425	2.316
6LU7_195522_uff_E=471.34	-5.9	7.092	3.062
6LU7_57392201_uff_E=381.98	-5.9	5.662	3.107
6LU7_56950843_uff_E=482.15	-5.9	6.91	3.21
6LU7_56950843_uff_E=482.15	-5.9	7.12	4.18
6LU7_56950842_uff_E=522.07	-5.9	5.584	2.171
6LU7_46843964_uff_E=523.87	-5.9	23.673	20.303
6LU7_44565974_uff_E=433.18	-5.9	4.615	2.542
6LU7_44565974_uff_E=433.18	-5.9	5.367	2.751
6LU7_44139589_uff_E=599.15	-5.9	20.343	17.4
6LU7_44139589_uff_E=599.15	-5.9	21.959	18.458
6LU7_25171635_uff_E=456.32	-5.9	21.266	17.566
6LU7_25171635_uff_E=456.32	-5.9	6.07	2.469
6LU7_25171634_uff_E=425.00	-5.9	6.658	2.82
6LU7_25171632_uff_E=683.46	-5.9	7.945	4.371
6LU7_25171632_uff_E=683.46	-5.9	3.645	2.381
6LU7_25171427_uff_E=451.54	-5.9	0	0
6LU7_15086460_uff_E=467.63	-5.9	5.971	2.611
6LU7_6452395_uff_E=485.14	-5.9	3.866	2.72
6LU7_253250_uff_E=428.28	-5.9	6.538	2.878
6LU7_253250_uff_E=428.28	-5.9	6.506	2.63
6LU7_176431_uff_E=457.70	-5.9	3.762	2.198
6LU7_139588134_uff_E=457.99	-5.9	3.843	2.384
6LU7_139588134_uff_E=457.99	-5.9	4.084	2.363
6LU7_139584816_uff_E=463.51	-5.9	5.85	3.318
6LU7_137652147_uff_E=534.82	-5.9	22.649	19.176
6LU7_137652147_uff_E=534.82	-5.9	6.674	2.667
6LU7_131770040_uff_E=354.57	-5.9	8.535	4.727
6LU7_131770040_uff_E=354.57	-5.9	4.106	2.771
6LU7_127053185_uff_E=417.22	-5.9	6.866	3.423
6LU7_127053184_uff_E=568.68	-5.9	4.929	2.833
6LU7_118263273_uff_E=1882.98	-5.9	3.712	2.041
6LU7_56924745_uff_E=399.54	-5.9	4.939	3.231
6LU7_44566078_uff_E=549.87	-5.9	6.247	3.11
6LU7_25171636_uff_E=493.57	-5.9	6.966	2.933
6LU7_10761572_uff_E=428.30	-5.9	6.415	2.951
6LU7_10761572_uff_E=428.30	-5.9	6.604	3.053
6LU7_941385_uff_E=474.79	-5.9	6.175	2.743
6LU7_941385_uff_E=474.79	-5.9	6.374	2.049
6LU7_630845_uff_E=373.54	-5.9	3.634	2.078
6LU7_298140_uff_E=400.18	-5.9	3.672	2.332
6LU7_154593892_uff_E=383.60	-5.9	7.483	4.204
6LU7_154388188_uff_E=342.57	-5.9	6.614	2.563
6LU7_154178022_uff_E=368.39	-5.9	0	0
6LU7_146559679_uff_E=391.25	-5.9	3.503	2.304
6LU7_144564145_uff_E=652.83	-5.9	7.643	3.155
6LU7_144564145_uff_E=652.83	-5.9	7.289	3.266
6LU7_142550537_uff_E=823.03	-5.9	8.244	4.032
6LU7_142550524_uff_E=360.94	-5.9	6.827	2.729
6LU7_142550519_uff_E=411.61	-5.9	8.05	5.353
6LU7_138514463_uff_E=391.15	-5.9	7.866	3.908
6LU7_138514463_uff_E=391.15	-5.9	7.477	4.395
6LU7_138514336_uff_E=331.78	-5.9	5.052	3.364
6LU7_138514336_uff_E=331.78	-5.9	21.307	19.591
6LU7_138514335_uff_E=406.05	-5.9	5.059	3.22
6LU7_138514334_uff_E=388.58	-5.9	6.819	4.515
6LU7_138496616_uff_E=483.72	-5.9	21.732	19.047
6LU7_137647518_uff_E=469.45	-5.9	6.206	2.611
6LU7_137467524_uff_E=386.34	-5.9	6.377	2.216
6LU7_137467447_uff_E=315.96	-5.9	2.823	2.117
6LU7_137467381_uff_E=489.66	-5.9	7.911	2.927
6LU7_137467368_uff_E=441.10	-5.9	7.121	3.056
6LU7_137467368_uff_E=441.10	-5.9	21.367	18.801
6LU7_137467367_uff_E=372.94	-5.9	5.791	3.799
6LU7_131975182_uff_E=561.17	-5.9	4.305	2.4
6LU7_131964492_uff_E=498.10	-5.9	8.091	2.651
6LU7_131964492_uff_E=498.10	-5.9	4.304	2.474
6LU7_129010273_uff_E=436.64	-5.9	6.408	2.534
6LU7_124024037_uff_E=377.64	-5.9	6.278	3.116
6LU7_124024037_uff_E=377.64	-5.9	6.605	4.477
6LU7_123836216_uff_E=631.96	-5.9	7.076	2.493
6LU7_123825667_uff_E=368.14	-5.9	6.122	2.689
6LU7_123396595_uff_E=400.61	-5.9	7.219	2.839
6LU7_123350254_uff_E=1809.62	-5.9	6.083	1.943
6LU7_123293391_uff_E=636.92	-5.9	7.931	2.893
6LU7_123282608_uff_E=523.14	-5.9	4.429	2.195
6LU7_118267131_uff_E=382.54	-5.9	6.632	2.556
6LU7_118267052_uff_E=464.23	-5.9	7.688	4.376
6LU7_118267049_uff_E=466.20	-5.9	7.12	2.971
6LU7_118267046_uff_E=447.92	-5.9	3.203	2.436
6LU7_118263272_uff_E=1079.99	-5.9	7.352	4.467
6LU7_118263269_uff_E=1102.50	-5.9	8.185	3.839
6LU7_118263268_uff_E=1104.59	-5.9	2.337	2.086
6LU7_118263246_uff_E=636.92	-5.9	7.89	2.902
6LU7_118263245_uff_E=614.68	-5.9	3.749	2.373
6LU7_118263243_uff_E=326.16	-5.9	4.969	3.225
6LU7_118263243_uff_E=326.16	-5.9	3.714	2.361
6LU7_118263241_uff_E=578.46	-5.9	7.625	2.657
6LU7_118263233_uff_E=562.91	-5.9	9.151	5.875
6LU7_118263228_uff_E=472.25	-5.9	21.388	18.502
6LU7_118254232_uff_E=631.91	-5.9	23.036	20.673
6LU7_118254232_uff_E=631.91	-5.9	7.902	3.916
6LU7_118254214_uff_E=630.93	-5.9	10.129	6.886
6LU7_118254213_uff_E=644.51	-5.9	7.797	3.252
6LU7_118254151_uff_E=635.34	-5.9	3.961	2.965
6LU7_118254145_uff_E=558.28	-5.9	12.792	9.522
6LU7_118254145_uff_E=558.28	-5.9	3.722	2.51
6LU7_118254142_uff_E=558.28	-5.9	12.868	9.616
6LU7_118254142_uff_E=558.28	-5.9	3.72	2.487
6LU7_118254103_uff_E=631.96	-5.9	18.321	13.444
6LU7_118218025_uff_E=467.72	-5.9	0	0
6LU7_91035900_uff_E=505.87	-5.9	8.305	3.296
6LU7_90958864_uff_E=541.66	-5.9	5.051	2.394
6LU7_89798228_uff_E=373.07	-5.9	3.84	2.105
6LU7_75218824_uff_E=483.43	-5.9	6.965	3.37
6LU7_75218824_uff_E=483.43	-5.9	4.442	2.472
6LU7_75218824_uff_E=483.43	-5.9	4.881	3.309
6LU7_75218801_uff_E=494.49	-5.9	0	0
6LU7_74426566_uff_E=467.72	-5.9	0	0
6LU7_73331629_uff_E=624.62	-5.9	5.062	3.051
6LU7_73331491_uff_E=631.59	-5.9	7.386	3.762
6LU7_73331490_uff_E=626.42	-5.9	2.307	1.624
6LU7_73331488_uff_E=637.67	-5.9	2.238	1.836
6LU7_73331487_uff_E=640.93	-5.9	18.75	15.739
6LU7_73331487_uff_E=640.93	-5.9	9.274	5.964
6LU7_73331487_uff_E=640.93	-5.9	6.409	3.309
6LU7_73331348_uff_E=633.58	-5.9	8.588	5.712
6LU7_73331344_uff_E=637.78	-5.9	4.109	2.743
6LU7_73331208_uff_E=661.17	-5.9	19.237	16.466
6LU7_73330912_uff_E=647.29	-5.9	7.585	3.855
6LU7_73330912_uff_E=647.29	-5.9	8.177	3.548
6LU7_73330910_uff_E=648.69	-5.9	7.293	2.459
6LU7_73330766_uff_E=651.99	-5.9	10.311	5.268
6LU7_73330766_uff_E=651.99	-5.9	22.985	19.413
6LU7_73330764_uff_E=710.57	-5.9	8.25	5.061
6LU7_73330764_uff_E=710.57	-5.9	7.157	2.551
6LU7_73330763_uff_E=714.76	-5.9	9.85	7.782
6LU7_73330625_uff_E=631.30	-5.9	18.2	16.483
6LU7_73330625_uff_E=631.30	-5.9	8.322	4.874
6LU7_71318422_uff_E=595.64	-5.9	3.182	2.108
6LU7_71318420_uff_E=519.02	-5.9	20.941	18.663
6LU7_70876805_uff_E=498.65	-5.9	4.51	3.371
6LU7_70870984_uff_E=487.13	-5.9	7.383	4.001
6LU7_70870984_uff_E=487.13	-5.9	6.247	2.995
6LU7_70658189_uff_E=385.06	-5.9	6.726	3.946
6LU7_70658189_uff_E=385.06	-5.9	6.431	2.399
6LU7_70658189_uff_E=385.06	-5.9	3.764	2.055
6LU7_68727568_uff_E=497.72	-5.9	6.98	2.922
6LU7_56950844_uff_E=501.37	-5.9	0	0
6LU7_46844083_uff_E=525.07	-5.9	6.843	4.104
6LU7_46844023_uff_E=474.74	-5.9	7.032	4.518
6LU7_46843965_uff_E=501.88	-5.9	2.665	2.224
6LU7_46843965_uff_E=501.88	-5.9	6.79	3.064
6LU7_46843963_uff_E=502.61	-5.9	3.843	2.686
6LU7_46843961_uff_E=566.24	-5.9	6.949	3.721
6LU7_46843961_uff_E=566.24	-5.9	6.441	3.359
6LU7_44566075_uff_E=523.32	-5.9	6.857	4.109
6LU7_44566068_uff_E=401.62	-5.9	20.642	17.537
6LU7_44566068_uff_E=401.62	-5.9	20.049	17.382
6LU7_44566051_uff_E=374.99	-5.9	6.298	2.995
6LU7_44139587_uff_E=1748.94	-5.9	7.814	3.788
6LU7_25171637_uff_E=456.94	-5.9	0	0
6LU7_14565585_uff_E=471.35	-5.9	7.1	3.065
6LU7_14565581_uff_E=465.26	-5.9	4.362	2.973
6LU7_13735050_uff_E=749.67	-5.9	8.679	3.95
6LU7_10407853_uff_E=504.30	-5.9	3.259	2.631
6LU7_10019062_uff_E=415.66	-5.9	6.249	3.343
6LU7_978391_uff_E=427.59	-5.9	6.354	1.964
6LU7_611918_uff_E=475.46	-5.9	3.538	2.435
6LU7_10097_uff_E=554.35	-5.9	5.17	3.242
6LU7_566721_uff_E=474.85	-5.9	4.533	2.89
6LU7_566721_uff_E=474.85	-5.9	5.209	3.35
6LU7_592609_uff_E=494.95	-5.9	6.937	2.915
6LU7_617268_uff_E=361.47	-5.9	4.862	2.993
6LU7_617268_uff_E=361.47	-5.9	6.272	2.212
6LU7_617713_uff_E=360.61	-5.9	4.864	2.83
6LU7_617713_uff_E=360.61	-5.9	6.07	2.475
6LU7_617713_uff_E=360.61	-5.9	17.677	16.423
6LU7_71317160_uff_E=364.50	-5.8	4.644	2.815
6LU7_44565921_uff_E=420.30	-5.8	6.128	2.326
6LU7_25171633_uff_E=466.90	-5.8	23.616	20.176
6LU7_9974417_uff_E=422.04	-5.8	3.733	1.982
6LU7_9974417_uff_E=422.04	-5.8	6.486	2.872
6LU7_3082005_uff_E=446.17	-5.8	5.982	3.849
6LU7_3082005_uff_E=446.17	-5.8	5.858	2.534
6LU7_978395_uff_E=436.39	-5.8	6.209	1.987
6LU7_44566065_uff_E=441.34	-5.8	7.136	4.383
6LU7_44566065_uff_E=441.34	-5.8	8.248	5.162
6LU7_44139588_uff_E=509.86	-5.8	6.454	2.878
6LU7_44139588_uff_E=509.86	-5.8	7.77	2.756
6LU7_44139468_uff_E=480.55	-5.8	7.104	4.338
6LU7_631655_uff_E=461.61	-5.8	5.866	3.498
6LU7_57392201_uff_E=381.98	-5.8	3.67	2.586
6LU7_57392201_uff_E=381.98	-5.8	6.532	2.482
6LU7_56924746_uff_E=397.29	-5.8	7.149	2.65
6LU7_46843964_uff_E=523.87	-5.8	5.384	2.424
6LU7_44565973_uff_E=439.63	-5.8	6.322	1.787
6LU7_44139589_uff_E=599.15	-5.8	16.641	12.824
6LU7_25171847_uff_E=476.88	-5.8	3.299	2.494
6LU7_25171635_uff_E=456.32	-5.8	5.215	3.567
6LU7_25171632_uff_E=683.46	-5.8	7.02	3.92
6LU7_25171428_uff_E=435.54	-5.8	0	0
6LU7_195521_uff_E=426.42	-5.8	6.072	3.843
6LU7_137652147_uff_E=534.82	-5.8	5.419	2.782
6LU7_137652147_uff_E=534.82	-5.8	6.002	2.397
6LU7_127053185_uff_E=417.22	-5.8	6.667	3.206
6LU7_118263273_uff_E=1882.98	-5.8	5.651	3.402
6LU7_76973812_uff_E=262.34	-5.8	7.509	4.505
6LU7_57397526_uff_E=321.86	-5.8	5.527	2.509
6LU7_57397526_uff_E=321.86	-5.8	4.924	3.01
6LU7_57395698_uff_E=490.56	-5.8	8.47	4.428
6LU7_57393956_uff_E=482.31	-5.8	4.789	3.155
6LU7_57393956_uff_E=482.31	-5.8	7.381	2.685
6LU7_57393956_uff_E=482.31	-5.8	18.471	16.075
6LU7_56924745_uff_E=399.54	-5.8	7.281	3.005
6LU7_44566076_uff_E=484.63	-5.8	3.231	2.467
6LU7_44566064_uff_E=432.11	-5.8	6.667	2.617
6LU7_44148513_uff_E=442.54	-5.8	6.745	3.291
6LU7_25171636_uff_E=493.57	-5.8	3.692	2.052
6LU7_14706665_uff_E=484.89	-5.8	6.36	2.734
6LU7_6604225_uff_E=488.78	-5.8	6.453	4.642
6LU7_6604225_uff_E=488.78	-5.8	5.927	3.427
6LU7_941385_uff_E=474.79	-5.8	6.136	3.719
6LU7_941385_uff_E=474.79	-5.8	6.893	3.029
6LU7_630845_uff_E=373.54	-5.8	7.564	3.55
6LU7_31336_uff_E=499.84	-5.8	3.715	2.179
6LU7_31336_uff_E=499.84	-5.8	4.56	2.766
6LU7_154593892_uff_E=383.60	-5.8	3.064	2.399
6LU7_154388188_uff_E=342.57	-5.8	6.567	3.06
6LU7_154388188_uff_E=342.57	-5.8	5.502	2.916
6LU7_153989287_uff_E=412.33	-5.8	7.489	3.206
6LU7_153852917_uff_E=321.39	-5.8	0	0
6LU7_153852917_uff_E=321.39	-5.8	6.323	2.928
6LU7_153852916_uff_E=343.22	-5.8	0	0
6LU7_148240297_uff_E=338.09	-5.8	3.726	1.401
6LU7_148240297_uff_E=338.09	-5.8	6.06	3.146
6LU7_144564145_uff_E=652.83	-5.8	2.851	2.48
6LU7_144564067_uff_E=408.10	-5.8	0	0
6LU7_144564067_uff_E=408.10	-5.8	2.379	1.831
6LU7_142550524_uff_E=360.94	-5.8	6.479	2.427
6LU7_138514463_uff_E=391.15	-5.8	7.031	4.853
6LU7_138514463_uff_E=391.15	-5.8	19.557	17.566
6LU7_137658162_uff_E=447.07	-5.8	3.535	2.296
6LU7_137647518_uff_E=469.45	-5.8	5.899	3.468
6LU7_137467528_uff_E=393.76	-5.8	3.402	2.065
6LU7_137467524_uff_E=386.34	-5.8	18.812	17.127
6LU7_137467397_uff_E=418.62	-5.8	7.299	2.575
6LU7_137467368_uff_E=441.10	-5.8	4.95	3.432
6LU7_135027778_uff_E=580.27	-5.8	1.909	1.715
6LU7_135027778_uff_E=580.27	-5.8	2.736	1.68
6LU7_135027778_uff_E=580.27	-5.8	3.712	2.939
6LU7_131975184_uff_E=547.56	-5.8	6.334	3.271
6LU7_131975184_uff_E=547.56	-5.8	21.973	18.748
6LU7_131975184_uff_E=547.56	-5.8	5.883	3.763
6LU7_131975182_uff_E=561.17	-5.8	7.343	2.058
6LU7_131975182_uff_E=561.17	-5.8	20.81	16.718
6LU7_131975182_uff_E=561.17	-5.8	6.846	3.405
6LU7_131964506_uff_E=573.49	-5.8	8.241	2.558
6LU7_131964506_uff_E=573.49	-5.8	4.659	2.473
6LU7_131964506_uff_E=573.49	-5.8	8.059	2.604
6LU7_131964498_uff_E=431.93	-5.8	7.208	2.041
6LU7_131964492_uff_E=498.10	-5.8	7.705	2.796
6LU7_123872201_uff_E=1875.00	-5.8	6.229	2.27
6LU7_123872201_uff_E=1875.00	-5.8	3.432	2.203
6LU7_123825667_uff_E=368.14	-5.8	5.175	3.316
6LU7_123293391_uff_E=636.92	-5.8	5.108	2.513
6LU7_118267131_uff_E=382.54	-5.8	4.272	2.698
6LU7_118267045_uff_E=475.47	-5.8	3.518	1.95
6LU7_118263272_uff_E=1079.99	-5.8	5.661	3.174
6LU7_118263268_uff_E=1104.59	-5.8	20.4	17.263
6LU7_118263268_uff_E=1104.59	-5.8	3.9	2.008
6LU7_118263264_uff_E=1066.87	-5.8	7.849	3.544
6LU7_118263250_uff_E=523.14	-5.8	8.514	3.007
6LU7_118263248_uff_E=603.75	-5.8	7.546	4.575
6LU7_118263245_uff_E=614.68	-5.8	3.67	2.19
6LU7_118263243_uff_E=326.16	-5.8	4.929	3.111
6LU7_118263242_uff_E=1835.61	-5.8	3.624	2.412
6LU7_118263237_uff_E=588.21	-5.8	3.669	2.178
6LU7_118254246_uff_E=635.83	-5.8	3.655	2.179
6LU7_118254246_uff_E=635.83	-5.8	6.716	2.601
6LU7_118254213_uff_E=644.51	-5.8	6.852	2.625
6LU7_118254213_uff_E=644.51	-5.8	5.197	2.892
6LU7_118254190_uff_E=511.99	-5.8	21.232	18.167
6LU7_118254182_uff_E=641.96	-5.8	7.527	4.001
6LU7_118254151_uff_E=635.34	-5.8	20.065	16.404
6LU7_118254131_uff_E=612.52	-5.8	2.681	2.191
6LU7_118254099_uff_E=523.14	-5.8	8.501	2.99
6LU7_118254083_uff_E=620.90	-5.8	7.333	3.739
6LU7_118218025_uff_E=467.72	-5.8	6.257	3.244
6LU7_91820110_uff_E=337.73	-5.8	6.258	2.032
6LU7_91820110_uff_E=337.73	-5.8	4.429	2.486
6LU7_90958864_uff_E=541.66	-5.8	4.137	2.126
6LU7_75218824_uff_E=483.43	-5.8	8.057	4.743
6LU7_74426566_uff_E=467.72	-5.8	6.409	3.275
6LU7_73331628_uff_E=624.00	-5.8	7.095	3.13
6LU7_73331491_uff_E=631.59	-5.8	23.153	20.726
6LU7_73331490_uff_E=626.42	-5.8	15.347	10.775
6LU7_73331347_uff_E=651.09	-5.8	2.904	2.039
6LU7_73331346_uff_E=611.27	-5.8	19.244	15.477
6LU7_73331208_uff_E=661.17	-5.8	16.807	15.326
6LU7_73331060_uff_E=634.29	-5.8	23.034	20.585
6LU7_73330912_uff_E=647.29	-5.8	8.806	5.276
6LU7_73330910_uff_E=648.69	-5.8	3.175	2.54
6LU7_73330910_uff_E=648.69	-5.8	14.736	9.406
6LU7_73330910_uff_E=648.69	-5.8	3.16	2.482
6LU7_73330764_uff_E=710.57	-5.8	8.775	5.008
6LU7_73330763_uff_E=714.76	-5.8	11.181	8.765
6LU7_73330763_uff_E=714.76	-5.8	20.343	17.748
6LU7_71737790_uff_E=419.80	-5.8	7.241	3.305
6LU7_71318422_uff_E=595.64	-5.8	7.034	2.407
6LU7_70870984_uff_E=487.13	-5.8	7.4	3.688
6LU7_70658189_uff_E=385.06	-5.8	6.456	2.526
6LU7_68727702_uff_E=407.12	-5.8	7.786	4.458
6LU7_57397525_uff_E=364.21	-5.8	3.783	2.833
6LU7_56950844_uff_E=501.37	-5.8	5.076	2.707
6LU7_46844022_uff_E=503.08	-5.8	3.791	2.414
6LU7_46844022_uff_E=503.08	-5.8	7.294	4.493
6LU7_46844022_uff_E=503.08	-5.8	21.601	18.696
6LU7_46843965_uff_E=501.88	-5.8	23.621	20.195
6LU7_44566051_uff_E=374.99	-5.8	5.951	2.276
6LU7_25171637_uff_E=456.94	-5.8	6.458	3.848
6LU7_25171637_uff_E=456.94	-5.8	6.224	2.865
6LU7_23955821_uff_E=351.99	-5.8	6.161	2.094
6LU7_14737140_uff_E=464.56	-5.8	7.281	3.145
6LU7_14565585_uff_E=471.35	-5.8	3.159	2.441
6LU7_13735050_uff_E=749.67	-5.8	8.844	4.048
6LU7_10407853_uff_E=504.30	-5.8	6.455	3.995
6LU7_10407853_uff_E=504.30	-5.8	6.267	2.586
6LU7_10019062_uff_E=415.66	-5.8	6.153	2.909
6LU7_978391_uff_E=427.59	-5.8	3.608	2.124
6LU7_611918_uff_E=475.46	-5.8	6.59	2.135
6LU7_611918_uff_E=475.46	-5.8	4.329	2.825
6LU7_611914_uff_E=389.12	-5.8	6.261	2.49
6LU7_611914_uff_E=389.12	-5.8	4.059	2.212
6LU7_611914_uff_E=389.12	-5.8	6.025	1.993
6LU7_611914_uff_E=389.12	-5.8	4.712	2.635
6LU7_586839_uff_E=882.59	-5.8	6.047	3.427
6LU7_617268_uff_E=361.47	-5.8	6.065	4.126
6LU7_441140_uff_E=466.49	-5.7	3.196	2.54
6LU7_441140_uff_E=466.49	-5.7	6.998	3.022
6LU7_71317160_uff_E=364.50	-5.7	7.088	2.342
6LU7_44565921_uff_E=420.30	-5.7	6.254	1.778
6LU7_44565921_uff_E=420.30	-5.7	4.31	2.416
6LU7_25171633_uff_E=466.90	-5.7	5.441	2.353
6LU7_3082005_uff_E=446.17	-5.7	6.188	2.124
6LU7_46844137_uff_E=493.79	-5.7	23.885	20.551
6LU7_46844137_uff_E=493.79	-5.7	6.069	2.97
6LU7_46844137_uff_E=493.79	-5.7	7.248	3.715
6LU7_46844024_uff_E=467.06	-5.7	6.165	2.911
6LU7_46844024_uff_E=467.06	-5.7	5.211	2.594
6LU7_46844024_uff_E=467.06	-5.7	6.011	3.185
6LU7_44139468_uff_E=480.55	-5.7	6.436	3.255
6LU7_5126442_uff_E=412.73	-5.7	6.594	2.634
6LU7_631655_uff_E=461.61	-5.7	5.955	2.999
6LU7_195522_uff_E=471.34	-5.7	3.308	2.441
6LU7_56950842_uff_E=522.07	-5.7	5.78	2.556
6LU7_56950842_uff_E=522.07	-5.7	5.72	2.594
6LU7_56950842_uff_E=522.07	-5.7	7.087	3.359
6LU7_44566031_uff_E=562.36	-5.7	4.65	3.02
6LU7_44565974_uff_E=433.18	-5.7	7.652	4.498
6LU7_44565973_uff_E=439.63	-5.7	4.679	2.383
6LU7_44139589_uff_E=599.15	-5.7	17.421	13.829
6LU7_25171847_uff_E=476.88	-5.7	6.775	2.921
6LU7_25171847_uff_E=476.88	-5.7	5.927	3.222
6LU7_25171635_uff_E=456.32	-5.7	2.442	1.959
6LU7_25171634_uff_E=425.00	-5.7	7.999	4.578
6LU7_25171632_uff_E=683.46	-5.7	8.833	5.502
6LU7_25171427_uff_E=451.54	-5.7	5.549	2.185
6LU7_25171426_uff_E=435.36	-5.7	5.835	2.193
6LU7_15086460_uff_E=467.63	-5.7	4.907	2.863
6LU7_15086460_uff_E=467.63	-5.7	7.559	2.764
6LU7_15086460_uff_E=467.63	-5.7	4.902	3.014
6LU7_195521_uff_E=426.42	-5.7	6.728	2.947
6LU7_195521_uff_E=426.42	-5.7	6.169	2.038
6LU7_195521_uff_E=426.42	-5.7	7.308	3.187
6LU7_176431_uff_E=457.70	-5.7	2.221	1.859
6LU7_137652147_uff_E=534.82	-5.7	22.97	19.244
6LU7_131770040_uff_E=354.57	-5.7	5.062	3.628
6LU7_131770040_uff_E=354.57	-5.7	6.186	2.947
6LU7_118263273_uff_E=1882.98	-5.7	2.902	2.354
6LU7_76973812_uff_E=262.34	-5.7	3.492	2.401
6LU7_57397526_uff_E=321.86	-5.7	3.854	2.596
6LU7_57397526_uff_E=321.86	-5.7	4.84	3.027
6LU7_57395698_uff_E=490.56	-5.7	6.784	3.78
6LU7_56924747_uff_E=515.53	-5.7	10.51	8.093
6LU7_44566078_uff_E=549.87	-5.7	6.519	3.359
6LU7_44148513_uff_E=442.54	-5.7	3.467	2.342
6LU7_44148513_uff_E=442.54	-5.7	6.392	3.015
6LU7_44139590_uff_E=680.31	-5.7	17.645	15.892
6LU7_44139590_uff_E=680.31	-5.7	8.281	3.029
6LU7_14706665_uff_E=484.89	-5.7	6.901	3.053
6LU7_6604225_uff_E=488.78	-5.7	6.141	2.067
6LU7_6604225_uff_E=488.78	-5.7	6.942	3.035
6LU7_620368_uff_E=417.12	-5.7	6.024	3.518
6LU7_620368_uff_E=417.12	-5.7	3.759	2.472
6LU7_154388188_uff_E=342.57	-5.7	5.034	2.808
6LU7_154388188_uff_E=342.57	-5.7	4.476	2.227
6LU7_154388188_uff_E=342.57	-5.7	5.652	2.877
6LU7_154178022_uff_E=368.39	-5.7	5.942	2.158
6LU7_154178022_uff_E=368.39	-5.7	5.902	2.278
6LU7_154178022_uff_E=368.39	-5.7	3.817	2.025
6LU7_154178022_uff_E=368.39	-5.7	4.346	2.45
6LU7_153852916_uff_E=343.22	-5.7	5.469	2.282
6LU7_146559679_uff_E=391.25	-5.7	4.321	2.374
6LU7_144564145_uff_E=652.83	-5.7	1.851	1.585
6LU7_144564145_uff_E=652.83	-5.7	5.542	3.531
6LU7_142550524_uff_E=360.94	-5.7	7.035	3.115
6LU7_138514465_uff_E=385.97	-5.7	7.185	2.236
6LU7_137658162_uff_E=447.07	-5.7	6.326	2.185
6LU7_137467528_uff_E=393.76	-5.7	21.774	19.835
6LU7_137467528_uff_E=393.76	-5.7	3.687	2.423
6LU7_137467524_uff_E=386.34	-5.7	4.137	2.366
6LU7_137467447_uff_E=315.96	-5.7	20.234	17.498
6LU7_137467447_uff_E=315.96	-5.7	3.684	2.543
6LU7_137467368_uff_E=441.10	-5.7	8.24	4.042
6LU7_137467368_uff_E=441.10	-5.7	4.266	2.839
6LU7_137467367_uff_E=372.94	-5.7	20.297	18.005
6LU7_137467367_uff_E=372.94	-5.7	18.933	16.916
6LU7_135027778_uff_E=580.27	-5.7	4.496	2.226
6LU7_135027778_uff_E=580.27	-5.7	20.129	17.751
6LU7_135027778_uff_E=580.27	-5.7	6.226	3.214
6LU7_135027778_uff_E=580.27	-5.7	6.415	2.418
6LU7_131975184_uff_E=547.56	-5.7	7.067	4.273
6LU7_131964505_uff_E=399.09	-5.7	7.002	2.209
6LU7_131964498_uff_E=431.93	-5.7	3.399	2.065
6LU7_131964492_uff_E=498.10	-5.7	7.209	2.976
6LU7_131964492_uff_E=498.10	-5.7	3.446	2.215
6LU7_124024037_uff_E=377.64	-5.7	5.614	2.214
6LU7_124024037_uff_E=377.64	-5.7	20.739	18.733
6LU7_123825667_uff_E=368.14	-5.7	21.972	20.269
6LU7_123350254_uff_E=1809.62	-5.7	7.693	3.537
6LU7_123293391_uff_E=636.92	-5.7	7.503	3.56
6LU7_123293391_uff_E=636.92	-5.7	23.61	20.173
6LU7_123282608_uff_E=523.14	-5.7	20.077	17.499
6LU7_118267131_uff_E=382.54	-5.7	2.08	1.705
6LU7_118267097_uff_E=473.76	-5.7	6.287	2.077
6LU7_118267073_uff_E=557.12	-5.7	4.379	2.372
6LU7_118267052_uff_E=464.23	-5.7	4.862	2.441
6LU7_118267045_uff_E=475.47	-5.7	7.353	3.112
6LU7_118263250_uff_E=523.14	-5.7	21.138	17.744
6LU7_118263246_uff_E=636.92	-5.7	7.25	3.42
6LU7_118263245_uff_E=614.68	-5.7	21.148	18.216
6LU7_118263244_uff_E=641.96	-5.7	22.952	19.602
6LU7_118263243_uff_E=326.16	-5.7	7.739	3.714
6LU7_118263242_uff_E=1835.61	-5.7	7.298	3.641
6LU7_118263242_uff_E=1835.61	-5.7	5.806	3.713
6LU7_118254219_uff_E=599.83	-5.7	5.901	2.108
6LU7_118254219_uff_E=599.83	-5.7	9.31	6.208
6LU7_118254213_uff_E=644.51	-5.7	24.218	21.017
6LU7_118254213_uff_E=644.51	-5.7	7.871	3.915
6LU7_118254151_uff_E=635.34	-5.7	6.043	3.673
6LU7_118254103_uff_E=631.96	-5.7	22.906	20.14
6LU7_118254099_uff_E=523.14	-5.7	4.417	3.132
6LU7_118254099_uff_E=523.14	-5.7	21.267	17.93
6LU7_118254083_uff_E=620.90	-5.7	9.384	5.729
6LU7_89798228_uff_E=373.07	-5.7	6.519	2.46
6LU7_75218825_uff_E=478.84	-5.7	6.723	3.385
6LU7_75218825_uff_E=478.84	-5.7	6.08	2.544
6LU7_75218824_uff_E=483.43	-5.7	21.948	19.418
6LU7_75218824_uff_E=483.43	-5.7	7.761	4.441
6LU7_73331491_uff_E=631.59	-5.7	8.739	5.977
6LU7_73331491_uff_E=631.59	-5.7	7.988	3.791
6LU7_73331490_uff_E=626.42	-5.7	6.643	2.546
6LU7_73331490_uff_E=626.42	-5.7	15.325	11.701
6LU7_73331347_uff_E=651.09	-5.7	12.905	8.838
6LU7_73331346_uff_E=611.27	-5.7	8.352	5.518
6LU7_73331205_uff_E=629.44	-5.7	15.662	12.229
6LU7_73331060_uff_E=634.29	-5.7	20.843	18.511
6LU7_73330912_uff_E=647.29	-5.7	19.479	16.645
6LU7_73330911_uff_E=636.92	-5.7	7.496	3.548
6LU7_73330910_uff_E=648.69	-5.7	18.969	14.866
6LU7_73330766_uff_E=651.99	-5.7	21.533	18.537
6LU7_73330764_uff_E=710.57	-5.7	14.556	10.31
6LU7_73330764_uff_E=710.57	-5.7	19.606	16.211
6LU7_73330762_uff_E=621.15	-5.7	20.003	17.118
6LU7_71318422_uff_E=595.64	-5.7	2.867	1.731
6LU7_71318422_uff_E=595.64	-5.7	6.774	2.881
6LU7_71318422_uff_E=595.64	-5.7	5.052	3.683
6LU7_71043635_uff_E=1668.80	-5.7	4.778	2.872
6LU7_71043635_uff_E=1668.80	-5.7	7.323	3.413
6LU7_71043635_uff_E=1668.80	-5.7	5.585	2.327
6LU7_70876805_uff_E=498.65	-5.7	7.48	5.014
6LU7_70876805_uff_E=498.65	-5.7	8.141	4.564
6LU7_68024713_uff_E=427.25	-5.7	7.487	4.387
6LU7_57397525_uff_E=364.21	-5.7	6.316	2.177
6LU7_57397525_uff_E=364.21	-5.7	7.346	3.325
6LU7_46844138_uff_E=498.83	-5.7	0	0
6LU7_46844079_uff_E=544.43	-5.7	5.944	3.408
6LU7_46844023_uff_E=474.74	-5.7	6.386	3.362
6LU7_46844022_uff_E=503.08	-5.7	6.478	3.323
6LU7_46843963_uff_E=502.61	-5.7	6.239	3.235
6LU7_46843961_uff_E=566.24	-5.7	5.912	2.471
6LU7_46843899_uff_E=466.21	-5.7	6.201	3.886
6LU7_44566051_uff_E=374.99	-5.7	6.306	2.892
6LU7_25171637_uff_E=456.94	-5.7	5.694	2.656
6LU7_23955821_uff_E=351.99	-5.7	6.557	2.542
6LU7_23955821_uff_E=351.99	-5.7	3.86	2.795
6LU7_14737140_uff_E=464.56	-5.7	7.182	3.486
6LU7_14565581_uff_E=465.26	-5.7	7.289	3.147
6LU7_13735050_uff_E=749.67	-5.7	7.577	2.626
6LU7_10407853_uff_E=504.30	-5.7	3.815	1.916
6LU7_10407853_uff_E=504.30	-5.7	4.58	2.355
6LU7_10407853_uff_E=504.30	-5.7	6.685	3.094
6LU7_10019062_uff_E=415.66	-5.7	3.805	2.023
6LU7_978391_uff_E=427.59	-5.7	3.992	2.413
6LU7_566721_uff_E=474.85	-5.7	5.904	2.83
6LU7_617268_uff_E=361.47	-5.7	19.788	17.759
6LU7_617268_uff_E=361.47	-5.7	3.246	2.561
6LU7_441140_uff_E=466.49	-5.6	5.887	3.459
6LU7_44565921_uff_E=420.30	-5.6	6.79	3.042
6LU7_44565921_uff_E=420.30	-5.6	3.133	2.517
6LU7_3082005_uff_E=446.17	-5.6	5.928	2.177
6LU7_978395_uff_E=436.39	-5.6	6.285	2.267
6LU7_161302_uff_E=363.38	-5.6	4.751	3.051
6LU7_46844137_uff_E=493.79	-5.6	7.346	4.087
6LU7_46844024_uff_E=467.06	-5.6	5.908	2.927
6LU7_44566077_uff_E=490.23	-5.6	6.919	3.312
6LU7_44566065_uff_E=441.34	-5.6	4.501	3.078
6LU7_6713927_uff_E=497.21	-5.6	2.9	2.499
6LU7_631655_uff_E=461.61	-5.6	6.284	2.447
6LU7_631655_uff_E=461.61	-5.6	6.912	2.667
6LU7_631655_uff_E=461.61	-5.6	6.926	3.048
6LU7_118207067_uff_E=773.99	-5.6	5.887	2.132
6LU7_46843964_uff_E=523.87	-5.6	6.582	3.474
6LU7_44566031_uff_E=562.36	-5.6	7.79	5.019
6LU7_44566031_uff_E=562.36	-5.6	6.632	3.587
6LU7_44565974_uff_E=433.18	-5.6	4.984	2.518
6LU7_44565974_uff_E=433.18	-5.6	6.158	3.991
6LU7_44565973_uff_E=439.63	-5.6	6.878	2.97
6LU7_25171634_uff_E=425.00	-5.6	4.166	2.633
6LU7_25171430_uff_E=1688.83	-5.6	5.824	2.946
6LU7_25171427_uff_E=451.54	-5.6	5.237	2.783
6LU7_15086460_uff_E=467.63	-5.6	21.776	19.863
6LU7_15086460_uff_E=467.63	-5.6	19.163	16.868
6LU7_176431_uff_E=457.70	-5.6	2.081	1.78
6LU7_176431_uff_E=457.70	-5.6	6.246	2.293
6LU7_139588134_uff_E=457.99	-5.6	2.142	1.742
6LU7_139584816_uff_E=463.51	-5.6	5.059	2.408
6LU7_137641183_uff_E=530.84	-5.6	0	0
6LU7_137641183_uff_E=530.84	-5.6	4.535	2.233
6LU7_127053184_uff_E=568.68	-5.6	2.2	1.294
6LU7_76973812_uff_E=262.34	-5.6	8.288	5.103
6LU7_57395698_uff_E=490.56	-5.6	7.986	4.462
6LU7_44566078_uff_E=549.87	-5.6	3.353	2.349
6LU7_44566078_uff_E=549.87	-5.6	6.375	2.911
6LU7_44566064_uff_E=432.11	-5.6	7	3.064
6LU7_44139590_uff_E=680.31	-5.6	7.933	2.566
6LU7_25171636_uff_E=493.57	-5.6	6.78	4.471
6LU7_14706665_uff_E=484.89	-5.6	6.26	2.253
6LU7_10761572_uff_E=428.30	-5.6	2.367	1.936
6LU7_6604225_uff_E=488.78	-5.6	4.001	2.529
6LU7_941385_uff_E=474.79	-5.6	6.836	2.647
6LU7_941385_uff_E=474.79	-5.6	6.133	3.181
6LU7_630845_uff_E=373.54	-5.6	20.204	17.849
6LU7_630845_uff_E=373.54	-5.6	7.71	3.444
6LU7_630845_uff_E=373.54	-5.6	2.984	2.609
6LU7_298140_uff_E=400.18	-5.6	5.401	3.483
6LU7_298140_uff_E=400.18	-5.6	7.191	3.647
6LU7_31336_uff_E=499.84	-5.6	6.537	2.764
6LU7_154388188_uff_E=342.57	-5.6	6.792	2.614
6LU7_153989287_uff_E=412.33	-5.6	3.635	2.753
6LU7_153852917_uff_E=321.39	-5.6	3.322	2.257
6LU7_153852916_uff_E=343.22	-5.6	2.136	1.356
6LU7_144564153_uff_E=641.96	-5.6	18.71	15.013
6LU7_144564153_uff_E=641.96	-5.6	21.525	18.231
6LU7_144564145_uff_E=652.83	-5.6	7.312	2.639
6LU7_144564145_uff_E=652.83	-5.6	13.94	10.629
6LU7_144564067_uff_E=408.10	-5.6	4.479	2.468
6LU7_142550519_uff_E=411.61	-5.6	5.524	3.403
6LU7_142550519_uff_E=411.61	-5.6	6.262	4.438
6LU7_142550519_uff_E=411.61	-5.6	4.811	3.285
6LU7_138514465_uff_E=385.97	-5.6	3.753	2.613
6LU7_138514463_uff_E=391.15	-5.6	7.492	4.335
6LU7_138514463_uff_E=391.15	-5.6	5.451	3.832
6LU7_138514335_uff_E=406.05	-5.6	4.141	3.122
6LU7_137658162_uff_E=447.07	-5.6	6.516	2.57
6LU7_137467524_uff_E=386.34	-5.6	5.532	3.389
6LU7_137467397_uff_E=418.62	-5.6	7.261	1.8
6LU7_137467397_uff_E=418.62	-5.6	19.981	17.319
6LU7_137467368_uff_E=441.10	-5.6	3.897	2.872
6LU7_131975182_uff_E=561.17	-5.6	7.588	1.91
6LU7_131964505_uff_E=399.09	-5.6	5.099	2.689
6LU7_131964505_uff_E=399.09	-5.6	7.424	2.806
6LU7_131964492_uff_E=498.10	-5.6	7.311	1.905
6LU7_129010273_uff_E=436.64	-5.6	6.239	2.149
6LU7_123872201_uff_E=1875.00	-5.6	5.831	3.191
6LU7_123704177_uff_E=624.00	-5.6	7.605	3.818
6LU7_123361815_uff_E=380.82	-5.6	4.431	2.768
6LU7_123350254_uff_E=1809.62	-5.6	4.685	2.759
6LU7_123282608_uff_E=523.14	-5.6	8.152	2.302
6LU7_118267097_uff_E=473.76	-5.6	21.107	18.786
6LU7_118267097_uff_E=473.76	-5.6	6.159	2.438
6LU7_118267046_uff_E=447.92	-5.6	6.349	2.005
6LU7_118267042_uff_E=443.73	-5.6	7.692	4.356
6LU7_118267042_uff_E=443.73	-5.6	4.82	2.293
6LU7_118267042_uff_E=443.73	-5.6	6.364	2.641
6LU7_118263272_uff_E=1079.99	-5.6	7.727	3.161
6LU7_118263268_uff_E=1104.59	-5.6	21.075	17.866
6LU7_118263264_uff_E=1066.87	-5.6	8.89	5.643
6LU7_118263250_uff_E=523.14	-5.6	4.213	2.931
6LU7_118263250_uff_E=523.14	-5.6	3.497	2.13
6LU7_118263247_uff_E=624.00	-5.6	7.62	3.799
6LU7_118263246_uff_E=636.92	-5.6	23.504	20.048
6LU7_118263241_uff_E=578.46	-5.6	16.336	12.619
6LU7_118263241_uff_E=578.46	-5.6	4.258	2.563
6LU7_118263237_uff_E=588.21	-5.6	21.326	18.41
6LU7_118263233_uff_E=562.91	-5.6	23.078	20.158
6LU7_118263233_uff_E=562.91	-5.6	8.85	4.286
6LU7_118254227_uff_E=641.19	-5.6	4.437	2.591
6LU7_118254213_uff_E=644.51	-5.6	8.172	4.57
6LU7_118254182_uff_E=641.96	-5.6	8.943	5.904
6LU7_118254179_uff_E=699.45	-5.6	7.561	4.276
6LU7_118254151_uff_E=635.34	-5.6	20.306	16.035
6LU7_118254151_uff_E=635.34	-5.6	16.813	13.84
6LU7_118254121_uff_E=637.58	-5.6	7.658	4.068
6LU7_118254103_uff_E=631.96	-5.6	7.599	2.651
6LU7_118254099_uff_E=523.14	-5.6	8.274	2.976
6LU7_118254083_uff_E=620.90	-5.6	20.217	17.215
6LU7_118207010_uff_E=1815.50	-5.6	6.495	2.347
6LU7_91820110_uff_E=337.73	-5.6	6.753	2.959
6LU7_91564943_uff_E=503.49	-5.6	21.851	18.242
6LU7_91564943_uff_E=503.49	-5.6	6.404	3.05
6LU7_91564943_uff_E=503.49	-5.6	2.498	1.814
6LU7_91035900_uff_E=505.87	-5.6	4.106	2.912
6LU7_89798228_uff_E=373.07	-5.6	5.995	3.463
6LU7_89798228_uff_E=373.07	-5.6	7	3.105
6LU7_89054741_uff_E=556.64	-5.6	0	0
6LU7_89054741_uff_E=556.64	-5.6	6.28	3.124
6LU7_75218825_uff_E=478.84	-5.6	5.713	3.424
6LU7_75218825_uff_E=478.84	-5.6	7.074	4.11
6LU7_75218825_uff_E=478.84	-5.6	7.415	3.631
6LU7_75218801_uff_E=494.49	-5.6	5.362	2.77
6LU7_74426566_uff_E=467.72	-5.6	3.304	2.027
6LU7_73331629_uff_E=624.62	-5.6	5.53	3.77
6LU7_73331628_uff_E=624.00	-5.6	7.639	3.826
6LU7_73331490_uff_E=626.42	-5.6	7.318	3.087
6LU7_73331060_uff_E=634.29	-5.6	19.926	17.724
6LU7_73331060_uff_E=634.29	-5.6	19.408	16.015
6LU7_73331060_uff_E=634.29	-5.6	10.342	6.868
6LU7_73330912_uff_E=647.29	-5.6	20.169	15.584
6LU7_73330910_uff_E=648.69	-5.6	18.438	15.106
6LU7_73330766_uff_E=651.99	-5.6	19.746	14.893
6LU7_73330764_uff_E=710.57	-5.6	21.115	17.338
6LU7_73330763_uff_E=714.76	-5.6	17.057	13.808
6LU7_73330763_uff_E=714.76	-5.6	9.771	3.24
6LU7_71318422_uff_E=595.64	-5.6	7.019	3.05
6LU7_71318422_uff_E=595.64	-5.6	4.906	2.832
6LU7_71318420_uff_E=519.02	-5.6	21.879	18.664
6LU7_68727702_uff_E=407.12	-5.6	6.781	2.757
6LU7_68024713_uff_E=427.25	-5.6	22.179	19.435
6LU7_68024713_uff_E=427.25	-5.6	21.927	19.449
6LU7_57390407_uff_E=486.36	-5.6	4.428	2.463
6LU7_56950844_uff_E=501.37	-5.6	8.173	4.078
6LU7_56950844_uff_E=501.37	-5.6	6.012	2.759
6LU7_46844079_uff_E=544.43	-5.6	21.673	18.534
6LU7_46844079_uff_E=544.43	-5.6	6.02	2.87
6LU7_46843963_uff_E=502.61	-5.6	4.737	2.847
6LU7_46843899_uff_E=466.21	-5.6	5.622	2.608
6LU7_44566068_uff_E=401.62	-5.6	3.908	2.599
6LU7_44566068_uff_E=401.62	-5.6	6.459	2.28
6LU7_44566051_uff_E=374.99	-5.6	6.562	2.925
6LU7_25171637_uff_E=456.94	-5.6	5.646	2.061
6LU7_23955821_uff_E=351.99	-5.6	4.361	2.623
6LU7_14565585_uff_E=471.35	-5.6	6.65	2.887
6LU7_13735050_uff_E=749.67	-5.6	9.002	4.072
6LU7_4125561_uff_E=421.60	-5.6	6.173	2.62
6LU7_4125561_uff_E=421.60	-5.6	5.385	2.612
6LU7_4125561_uff_E=421.60	-5.6	4.461	2.48
6LU7_978391_uff_E=427.59	-5.6	7.739	3.658
6LU7_611918_uff_E=475.46	-5.6	20.338	18
6LU7_611918_uff_E=475.46	-5.6	6.334	2.469
6LU7_611914_uff_E=389.12	-5.6	6.578	4.125
6LU7_574586_uff_E=496.46	-5.6	7.746	2.804
6LU7_574586_uff_E=496.46	-5.6	19.85	17.544
6LU7_586858_uff_E=517.53	-5.6	6.319	2.727
6LU7_617268_uff_E=361.47	-5.6	7.265	3.496
6LU7_3512_uff_E=436.39	-5.5	6.259	2.286
6LU7_25171633_uff_E=466.90	-5.5	4.89	3.08
6LU7_25171633_uff_E=466.90	-5.5	6.506	3.333
6LU7_21677661_uff_E=485.34	-5.5	3.694	2.417
6LU7_21677661_uff_E=485.34	-5.5	6.446	2.513
6LU7_6713927_uff_E=497.21	-5.5	4.619	3.014
6LU7_5702061_uff_E=436.39	-5.5	6.301	2.108
6LU7_5126442_uff_E=412.73	-5.5	6.312	2.286
6LU7_195522_uff_E=471.34	-5.5	18.378	16.507
6LU7_57392201_uff_E=381.98	-5.5	7.629	4.44
6LU7_57392201_uff_E=381.98	-5.5	5.149	2.57
6LU7_56924746_uff_E=397.29	-5.5	6.705	2.896
6LU7_56924746_uff_E=397.29	-5.5	3.027	2.432
6LU7_56924746_uff_E=397.29	-5.5	6.489	2.499
6LU7_25171635_uff_E=456.32	-5.5	6.057	2.196
6LU7_25171634_uff_E=425.00	-5.5	6.219	2.797
6LU7_25171632_uff_E=683.46	-5.5	22.858	20.082
6LU7_25171632_uff_E=683.46	-5.5	6.234	3.174
6LU7_25171430_uff_E=1688.83	-5.5	6.736	2.909
6LU7_25171427_uff_E=451.54	-5.5	8.304	3.956
6LU7_253250_uff_E=428.28	-5.5	6.191	2.343
6LU7_176431_uff_E=457.70	-5.5	6.956	2.846
6LU7_127053185_uff_E=417.22	-5.5	21.631	19.195
6LU7_127053184_uff_E=568.68	-5.5	4.461	2.645
6LU7_127053184_uff_E=568.68	-5.5	20.096	17.556
6LU7_127053184_uff_E=568.68	-5.5	3.294	2.31
6LU7_118263273_uff_E=1882.98	-5.5	6.58	2.738
6LU7_76973812_uff_E=262.34	-5.5	5.965	3.968
6LU7_44566078_uff_E=549.87	-5.5	4.525	2.519
6LU7_44566078_uff_E=549.87	-5.5	5.393	2.804
6LU7_44566064_uff_E=432.11	-5.5	4.023	2.586
6LU7_44148513_uff_E=442.54	-5.5	6.816	3.193
6LU7_620368_uff_E=417.12	-5.5	3.853	2.353
6LU7_31336_uff_E=499.84	-5.5	4.064	2.525
6LU7_31336_uff_E=499.84	-5.5	21.505	18.47
6LU7_154593892_uff_E=383.60	-5.5	6.479	3.101
6LU7_154593892_uff_E=383.60	-5.5	4.582	2.87
6LU7_154388188_uff_E=342.57	-5.5	5.005	2.546
6LU7_153852916_uff_E=343.22	-5.5	4.115	2.402
6LU7_148240297_uff_E=338.09	-5.5	6.867	3.911
6LU7_148240297_uff_E=338.09	-5.5	6.585	3.632
6LU7_146559679_uff_E=391.25	-5.5	6.795	3.014
6LU7_146559679_uff_E=391.25	-5.5	7.111	3.459
6LU7_144564153_uff_E=641.96	-5.5	20.934	17.871
6LU7_142550524_uff_E=360.94	-5.5	3.294	2.523
6LU7_137658162_uff_E=447.07	-5.5	5.597	2.851
6LU7_137658162_uff_E=447.07	-5.5	7.547	3.455
6LU7_137647518_uff_E=469.45	-5.5	7.322	3.944
6LU7_137647518_uff_E=469.45	-5.5	6.689	3.308
6LU7_137467447_uff_E=315.96	-5.5	2.189	1.916
6LU7_137467397_uff_E=418.62	-5.5	7.161	2.98
6LU7_131975182_uff_E=561.17	-5.5	8.114	2.548
6LU7_131964506_uff_E=573.49	-5.5	21.702	18.008
6LU7_131964505_uff_E=399.09	-5.5	5.379	2.845
6LU7_123846923_uff_E=605.00	-5.5	5.504	3.331
6LU7_123836216_uff_E=631.96	-5.5	7.219	3.928
6LU7_123825667_uff_E=368.14	-5.5	7.459	3.173
6LU7_123361815_uff_E=380.82	-5.5	19.216	17.546
6LU7_123350254_uff_E=1809.62	-5.5	20.627	18.061
6LU7_123350254_uff_E=1809.62	-5.5	6.981	3.024
6LU7_123293391_uff_E=636.92	-5.5	7.283	3.299
6LU7_123293391_uff_E=636.92	-5.5	8.782	4.428
6LU7_123282608_uff_E=523.14	-5.5	7.807	3.795
6LU7_119091269_uff_E=287.41	-5.5	0	0
6LU7_118267131_uff_E=382.54	-5.5	20.172	17.986
6LU7_118267097_uff_E=473.76	-5.5	20.56	18.024
6LU7_118267049_uff_E=466.20	-5.5	18.412	16.41
6LU7_118267049_uff_E=466.20	-5.5	3.81	2.292
6LU7_118267046_uff_E=447.92	-5.5	18.4	16.416
6LU7_118267045_uff_E=475.47	-5.5	19.577	17.234
6LU7_118263269_uff_E=1102.50	-5.5	21.184	18.437
6LU7_118263268_uff_E=1104.59	-5.5	4.573	2.508
6LU7_118263264_uff_E=1066.87	-5.5	7.872	3.454
6LU7_118263245_uff_E=614.68	-5.5	16.164	12.813
6LU7_118263244_uff_E=641.96	-5.5	7.883	4.171
6LU7_118263244_uff_E=641.96	-5.5	18.672	15.074
6LU7_118263241_uff_E=578.46	-5.5	18.187	16.102
6LU7_118254246_uff_E=635.83	-5.5	6.843	2.306
6LU7_118254227_uff_E=641.19	-5.5	15.107	11.685
6LU7_118254213_uff_E=644.51	-5.5	8.894	5.758
6LU7_118254190_uff_E=511.99	-5.5	7.549	4.826
6LU7_118254182_uff_E=641.96	-5.5	20.893	17.75
6LU7_118254179_uff_E=699.45	-5.5	12.724	10.255
6LU7_118254179_uff_E=699.45	-5.5	8.187	5.895
6LU7_118254121_uff_E=637.58	-5.5	19.226	15.223
6LU7_118254121_uff_E=637.58	-5.5	23.099	20.551
6LU7_118254083_uff_E=620.90	-5.5	8.789	5.776
6LU7_118254083_uff_E=620.90	-5.5	7.505	3.359
6LU7_118218025_uff_E=467.72	-5.5	6.022	2.941
6LU7_118218025_uff_E=467.72	-5.5	2.974	2.16
6LU7_91564943_uff_E=503.49	-5.5	21.34	18.131
6LU7_91564943_uff_E=503.49	-5.5	7.109	3.701
6LU7_91109362_uff_E=525.20	-5.5	6.878	2.849
6LU7_91109362_uff_E=525.20	-5.5	3.366	2.446
6LU7_91109362_uff_E=525.20	-5.5	6.538	2.16
6LU7_91035900_uff_E=505.87	-5.5	5.697	3.386
6LU7_89798228_uff_E=373.07	-5.5	6.225	1.997
6LU7_89054741_uff_E=556.64	-5.5	2.188	1.301
6LU7_75218847_uff_E=520.97	-5.5	0	0
6LU7_75218825_uff_E=478.84	-5.5	22.02	18.825
6LU7_75218825_uff_E=478.84	-5.5	5.675	2.635
6LU7_75218825_uff_E=478.84	-5.5	6.399	3.42
6LU7_75218823_uff_E=527.02	-5.5	0	0
6LU7_75218823_uff_E=527.02	-5.5	4.464	2.156
6LU7_74426566_uff_E=467.72	-5.5	9.276	6.004
6LU7_73331629_uff_E=624.62	-5.5	18.836	15.476
6LU7_73331491_uff_E=631.59	-5.5	7.437	3.734
6LU7_73331490_uff_E=626.42	-5.5	16.189	12.586
6LU7_73330911_uff_E=636.92	-5.5	7.281	3.519
6LU7_73330762_uff_E=621.15	-5.5	16.316	12.966
6LU7_73330762_uff_E=621.15	-5.5	20.369	16.689
6LU7_71318422_uff_E=595.64	-5.5	20.806	18.644
6LU7_71318420_uff_E=519.02	-5.5	7.427	3.132
6LU7_71318420_uff_E=519.02	-5.5	22.544	19.974
6LU7_71318420_uff_E=519.02	-5.5	20.752	18.357
6LU7_70658189_uff_E=385.06	-5.5	6.217	2.336
6LU7_68727702_uff_E=407.12	-5.5	5.965	3.735
6LU7_57390407_uff_E=486.36	-5.5	3.952	2.447
6LU7_56950844_uff_E=501.37	-5.5	23.869	20.108
6LU7_46844083_uff_E=525.07	-5.5	5.388	2.503
6LU7_46844083_uff_E=525.07	-5.5	5.61	2.512
6LU7_46844079_uff_E=544.43	-5.5	5.149	3.741
6LU7_46844079_uff_E=544.43	-5.5	22.423	19.067
6LU7_46843963_uff_E=502.61	-5.5	6.15	3.005
6LU7_46843963_uff_E=502.61	-5.5	6.407	3.123
6LU7_46843961_uff_E=566.24	-5.5	5.978	2.692
6LU7_44566051_uff_E=374.99	-5.5	6.046	3.615
6LU7_44139587_uff_E=1748.94	-5.5	5.838	3.913
6LU7_23955821_uff_E=351.99	-5.5	5.72	3.678
6LU7_14737140_uff_E=464.56	-5.5	15.447	12.441
6LU7_14737140_uff_E=464.56	-5.5	4.18	3.188
6LU7_14565585_uff_E=471.35	-5.5	6.641	2.773
6LU7_612127_uff_E=488.19	-5.5	6.358	2.034
6LU7_10097_uff_E=554.35	-5.5	7.85	2.974
6LU7_10097_uff_E=554.35	-5.5	19.218	16.858
6LU7_566721_uff_E=474.85	-5.5	21.028	18.98
6LU7_574586_uff_E=496.46	-5.5	5.55	3.378
6LU7_586839_uff_E=882.59	-5.5	4.594	2.86
6LU7_586858_uff_E=517.53	-5.5	6.4	2.654
6LU7_3512_uff_E=436.39	-5.4	20.551	17.847
6LU7_3082005_uff_E=446.17	-5.4	7.735	4.132
6LU7_978395_uff_E=436.39	-5.4	20.549	17.895
6LU7_978395_uff_E=436.39	-5.4	4.756	2.872
6LU7_161302_uff_E=363.38	-5.4	20.627	17.929
6LU7_46844137_uff_E=493.79	-5.4	8.325	4.913
6LU7_46844024_uff_E=467.06	-5.4	6.842	3.392
6LU7_6713927_uff_E=497.21	-5.4	3.627	2.381
6LU7_5702061_uff_E=436.39	-5.4	20.519	17.831
6LU7_5126442_uff_E=412.73	-5.4	20.324	17.852
6LU7_631655_uff_E=461.61	-5.4	4.188	2.528
6LU7_118207067_uff_E=773.99	-5.4	5.651	3.47
6LU7_118207067_uff_E=773.99	-5.4	5.186	3.246
6LU7_57392201_uff_E=381.98	-5.4	8.247	4.698
6LU7_56924746_uff_E=397.29	-5.4	18.404	16.713
6LU7_46843964_uff_E=523.87	-5.4	6.401	3.396
6LU7_44566031_uff_E=562.36	-5.4	5.435	2.652
6LU7_44139589_uff_E=599.15	-5.4	16.918	13.278
6LU7_25171635_uff_E=456.32	-5.4	5.49	2.421
6LU7_25171634_uff_E=425.00	-5.4	7.024	4.435
6LU7_25171632_uff_E=683.46	-5.4	7.935	4.154
6LU7_25171632_uff_E=683.46	-5.4	8.873	6.148
6LU7_25171428_uff_E=435.54	-5.4	2.71	1.218
6LU7_253250_uff_E=428.28	-5.4	20.981	18.547
6LU7_139588134_uff_E=457.99	-5.4	20.615	18.284
6LU7_139584816_uff_E=463.51	-5.4	7.69	3.859
6LU7_139584816_uff_E=463.51	-5.4	7.3	3.895
6LU7_137641183_uff_E=530.84	-5.4	6.115	3.16
6LU7_127053185_uff_E=417.22	-5.4	8.209	4.687
6LU7_127053185_uff_E=417.22	-5.4	5.892	3.765
6LU7_118263273_uff_E=1882.98	-5.4	6.93	2.981
6LU7_57395698_uff_E=490.56	-5.4	7.82	5.629
6LU7_44566078_uff_E=549.87	-5.4	6.138	2.869
6LU7_44566078_uff_E=549.87	-5.4	6.387	3.074
6LU7_44566064_uff_E=432.11	-5.4	6.642	2.852
6LU7_14706665_uff_E=484.89	-5.4	6.493	2.798
6LU7_14706665_uff_E=484.89	-5.4	3.136	2.531
6LU7_14706665_uff_E=484.89	-5.4	4.071	2.474
6LU7_10761572_uff_E=428.30	-5.4	6.159	2.41
6LU7_620368_uff_E=417.12	-5.4	7.486	4.356
6LU7_620368_uff_E=417.12	-5.4	6.891	2.532
6LU7_31336_uff_E=499.84	-5.4	7.012	2.396
6LU7_154178022_uff_E=368.39	-5.4	2.278	1.999
6LU7_153852917_uff_E=321.39	-5.4	6.439	2.396
6LU7_153852917_uff_E=321.39	-5.4	2.492	2.001
6LU7_153852917_uff_E=321.39	-5.4	3.983	2.489
6LU7_153852916_uff_E=343.22	-5.4	5.903	2.433
6LU7_148240297_uff_E=338.09	-5.4	6.487	3.316
6LU7_147116578_uff_E=520.21	-5.4	7.705	2.803
6LU7_146559679_uff_E=391.25	-5.4	5.123	2.713
6LU7_146559679_uff_E=391.25	-5.4	20.524	18.029
6LU7_144564153_uff_E=641.96	-5.4	20.143	16.519
6LU7_142550538_uff_E=347.64	-5.4	2.625	2.277
6LU7_142550538_uff_E=347.64	-5.4	4.288	2.737
6LU7_142550519_uff_E=411.61	-5.4	8.727	5.515
6LU7_138514335_uff_E=406.05	-5.4	7.114	3.618
6LU7_131964506_uff_E=573.49	-5.4	6.13	3.477
6LU7_131964506_uff_E=573.49	-5.4	7.751	3.246
6LU7_131964505_uff_E=399.09	-5.4	7.152	3.402
6LU7_131964505_uff_E=399.09	-5.4	7.295	2.971
6LU7_131964498_uff_E=431.93	-5.4	8.352	3.375
6LU7_131964498_uff_E=431.93	-5.4	8.095	2.807
6LU7_129010273_uff_E=436.64	-5.4	6.27	2.272
6LU7_129010273_uff_E=436.64	-5.4	20.527	17.876
6LU7_124024037_uff_E=377.64	-5.4	6.079	2.572
6LU7_123704177_uff_E=624.00	-5.4	7.384	4.008
6LU7_123396595_uff_E=400.61	-5.4	6.646	2.738
6LU7_123396595_uff_E=400.61	-5.4	3.951	2.369
6LU7_123396595_uff_E=400.61	-5.4	18.523	16.753
6LU7_123361815_uff_E=380.82	-5.4	18.548	16.172
6LU7_123293391_uff_E=636.92	-5.4	21.002	16.28
6LU7_123282608_uff_E=523.14	-5.4	18.151	15.47
6LU7_119091269_uff_E=287.41	-5.4	5.668	2.514
6LU7_118267131_uff_E=382.54	-5.4	4.747	2.839
6LU7_118267096_uff_E=623.75	-5.4	2.363	1.759
6LU7_118267073_uff_E=557.12	-5.4	4.348	2.532
6LU7_118267052_uff_E=464.23	-5.4	8.465	5.097
6LU7_118267052_uff_E=464.23	-5.4	3.927	2.325
6LU7_118267049_uff_E=466.20	-5.4	20.907	18.386
6LU7_118267046_uff_E=447.92	-5.4	4.644	2.964
6LU7_118267046_uff_E=447.92	-5.4	3.943	2.407
6LU7_118263269_uff_E=1102.50	-5.4	7.641	4.24
6LU7_118263251_uff_E=515.77	-5.4	18.586	15.342
6LU7_118263250_uff_E=523.14	-5.4	5.701	3.856
6LU7_118263247_uff_E=624.00	-5.4	7.364	3.976
6LU7_118263246_uff_E=636.92	-5.4	8.119	3.936
6LU7_118263246_uff_E=636.92	-5.4	8.554	4.291
6LU7_118263246_uff_E=636.92	-5.4	8.533	4.159
6LU7_118263246_uff_E=636.92	-5.4	7.17	3.687
6LU7_118263243_uff_E=326.16	-5.4	19.118	16.904
6LU7_118263242_uff_E=1835.61	-5.4	21.145	18.706
6LU7_118263241_uff_E=578.46	-5.4	7.93	3.222
6LU7_118263237_uff_E=588.21	-5.4	3.419	2.656
6LU7_118263237_uff_E=588.21	-5.4	17.443	15.056
6LU7_118254246_uff_E=635.83	-5.4	16.214	12.247
6LU7_118254246_uff_E=635.83	-5.4	7.017	2.662
6LU7_118254219_uff_E=599.83	-5.4	6.811	5.051
6LU7_118254213_uff_E=644.51	-5.4	7.869	4.972
6LU7_118254190_uff_E=511.99	-5.4	7.099	2.582
6LU7_118254190_uff_E=511.99	-5.4	6.527	3.005
6LU7_118254179_uff_E=699.45	-5.4	22.05	19.715
6LU7_118254121_uff_E=637.58	-5.4	19.946	16.713
6LU7_118254121_uff_E=637.58	-5.4	8.031	3.975
6LU7_118254099_uff_E=523.14	-5.4	5.704	3.779
6LU7_118254099_uff_E=523.14	-5.4	4.312	2.993
6LU7_118254083_uff_E=620.90	-5.4	22.297	19.684
6LU7_118218025_uff_E=467.72	-5.4	9.208	5.851
6LU7_118207010_uff_E=1815.50	-5.4	6.844	3.071
6LU7_118207010_uff_E=1815.50	-5.4	20.589	17.762
6LU7_91564943_uff_E=503.49	-5.4	7.957	4.423
6LU7_91564943_uff_E=503.49	-5.4	21.257	18.694
6LU7_91564943_uff_E=503.49	-5.4	8.548	5.767
6LU7_91109362_uff_E=525.20	-5.4	4.343	2.176
6LU7_89798228_uff_E=373.07	-5.4	3.193	2.433
6LU7_75218847_uff_E=520.97	-5.4	5.722	2.884
6LU7_75218847_uff_E=520.97	-5.4	2.091	1.649
6LU7_75218801_uff_E=494.49	-5.4	7.701	4.539
6LU7_75218801_uff_E=494.49	-5.4	7.02	4.125
6LU7_74426566_uff_E=467.72	-5.4	7.016	4.399
6LU7_74426566_uff_E=467.72	-5.4	7.19	3.868
6LU7_73331629_uff_E=624.62	-5.4	7.105	4.31
6LU7_73331629_uff_E=624.62	-5.4	16.22	13.744
6LU7_73331629_uff_E=624.62	-5.4	7.01	4.242
6LU7_73331628_uff_E=624.00	-5.4	7.342	3.976
6LU7_73330911_uff_E=636.92	-5.4	8.315	4.147
6LU7_73330911_uff_E=636.92	-5.4	21.357	17.229
6LU7_71737790_uff_E=419.80	-5.4	18.426	16.647
6LU7_68727702_uff_E=407.12	-5.4	7.502	3.475
6LU7_68727702_uff_E=407.12	-5.4	9.136	6.49
6LU7_46843962_uff_E=816.62	-5.4	22.078	19.445
6LU7_46843962_uff_E=816.62	-5.4	5.099	2.958
6LU7_46843962_uff_E=816.62	-5.4	7.58	4.08
6LU7_46843962_uff_E=816.62	-5.4	6.378	3.706
6LU7_44566068_uff_E=401.62	-5.4	3.596	2.707
6LU7_25171637_uff_E=456.94	-5.4	2.765	2.026
6LU7_14565581_uff_E=465.26	-5.4	18.356	16.584
6LU7_10407853_uff_E=504.30	-5.4	6.718	3.231
6LU7_612127_uff_E=488.19	-5.4	20.226	17.613
6LU7_612127_uff_E=488.19	-5.4	4.045	2.61
6LU7_611918_uff_E=475.46	-5.4	6.069	2.088
6LU7_566721_uff_E=474.85	-5.4	19.157	16.923
6LU7_574586_uff_E=496.46	-5.4	21.074	18.599
6LU7_586858_uff_E=517.53	-5.4	20.147	17.549
6LU7_586858_uff_E=517.53	-5.4	4.765	2.755
6LU7_3512_uff_E=436.39	-5.3	4.728	2.863
6LU7_978395_uff_E=436.39	-5.3	7.013	2.625
6LU7_161302_uff_E=363.38	-5.3	6.061	2.285
6LU7_46844024_uff_E=467.06	-5.3	6.787	3.346
6LU7_5126442_uff_E=412.73	-5.3	21.523	18.809
6LU7_289550_uff_E=239.38	-5.3	0	0
6LU7_195522_uff_E=471.34	-5.3	3.954	2.687
6LU7_118207067_uff_E=773.99	-5.3	7.098	3.232
6LU7_118207067_uff_E=773.99	-5.3	19.781	17.354
6LU7_56950843_uff_E=482.15	-5.3	23.745	20.289
6LU7_56950843_uff_E=482.15	-5.3	21.343	18.664
6LU7_56950843_uff_E=482.15	-5.3	22.035	18.543
6LU7_44565974_uff_E=433.18	-5.3	9.034	6.357
[truncated: 395 more rows]

## Sheet: PyRx_ACE2
_	Binding Affinity	rmsd/ub	rmsd/lb
ACE2(6M0J)_129895222_uff_E=505.08	-7.2	0	0
ACE2(6M0J)_132286359_uff_E=505.08	-7.2	0	0
ACE2(6M0J)_44566075_uff_E=523.32	-7.1	0	0
ACE2(6M0J)_10574693_uff_E=486.37	-7	0	0
ACE2(6M0J)_10621755_uff_E=626.37	-7	0	0
ACE2(6M0J)_10623284_uff_E=545.80	-7	0	0
ACE2(6M0J)_118254131_uff_E=612.52	-7	0	0
ACE2(6M0J)_132286067_uff_E=605.32	-7	0	0
ACE2(6M0J)_125429178_uff_E=504.54	-6.9	0	0
ACE2(6M0J)_129895451_uff_E=502.94	-6.9	0	0
ACE2(6M0J)_147116578_uff_E=520.21	-6.9	0	0
ACE2(6M0J)_25171849_uff_E=574.34	-6.9	0	0
ACE2(6M0J)_46844082_uff_E=682.67	-6.9	0	0
ACE2(6M0J)_56950846_uff_E=485.31	-6.9	0	0
ACE2(6M0J)_10837041_uff_E=552.85	-6.8	0	0
ACE2(6M0J)_118254232_uff_E=631.91	-6.8	0	0
ACE2(6M0J)_118263269_uff_E=1102.50	-6.8	0	0
ACE2(6M0J)_129895618_uff_E=499.93	-6.8	0	0
ACE2(6M0J)_56950845_uff_E=553.08	-6.8	0	0
ACE2(6M0J)_73330766_uff_E=651.99	-6.8	0	0
ACE2(6M0J)_10787978_uff_E=533.30	-6.7	0	0
ACE2(6M0J)_118254214_uff_E=630.93	-6.7	0	0
ACE2(6M0J)_118263268_uff_E=1104.59	-6.7	0	0
ACE2(6M0J)_125429126_uff_E=510.78	-6.7	0	0
ACE2(6M0J)_125429633_uff_E=507.88	-6.7	0	0
ACE2(6M0J)_129895481_uff_E=567.88	-6.7	0	0
ACE2(6M0J)_137467447_uff_E=315.96	-6.7	0	0
ACE2(6M0J)_73331060_uff_E=634.29	-6.7	0	0
ACE2(6M0J)_73331348_uff_E=633.58	-6.7	0	0
ACE2(6M0J)_73331487_uff_E=640.93	-6.7	0	0
ACE2(6M0J)_73331491_uff_E=631.59	-6.7	0	0
ACE2(6M0J)_10693960_uff_E=552.84	-6.6	0	0
ACE2(6M0J)_10574693_uff_E=486.37	-6.6	0	0
ACE2(6M0J)_118254121_uff_E=637.58	-6.6	0	0
ACE2(6M0J)_118254142_uff_E=558.28	-6.6	0	0
ACE2(6M0J)_118267045_uff_E=475.47	-6.6	0	0
ACE2(6M0J)_121304016	-6.6	0	0
ACE2(6M0J)_125429634_uff_E=502.94	-6.6	0	0
ACE2(6M0J)_137467381_uff_E=489.66	-6.6	0	0
ACE2(6M0J)_138514335_uff_E=406.05	-6.6	0	0
ACE2(6M0J)_73331209_uff_E=661.60	-6.6	0	0
ACE2(6M0J)_73331345_uff_E=668.75	-6.6	0	0
ACE2(6M0J)_10097_uff_E=554.35	-6.5	0	0
ACE2(6M0J)_118254151_uff_E=635.34	-6.5	0	0
ACE2(6M0J)_125428750_uff_E=537.29	-6.5	0	0
ACE2(6M0J)_125429841_uff_E=499.93	-6.5	0	0
ACE2(6M0J)_127053185_uff_E=417.22	-6.5	0	0
ACE2(6M0J)_129894712_uff_E=519.13	-6.5	0	0
ACE2(6M0J)_132286397_uff_E=602.85	-6.5	0	0
ACE2(6M0J)_21629991_uff_E=425.22	-6.5	0	0
ACE2(6M0J)_44139589_uff_E=599.15	-6.5	0	0
ACE2(6M0J)_56924747_uff_E=515.53	-6.5	0	0
ACE2(6M0J)_73331208_uff_E=661.17	-6.5	0	0
ACE2(6M0J)_73331632_uff_E=609.71	-6.5	0	0
ACE2(6M0J)_101592379_uff_E=353.83	-6.4	0	0
ACE2(6M0J)_102239942_uff_E=477.31	-6.4	0	0
ACE2(6M0J)_10691458_uff_E=474.28	-6.4	0	0
ACE2(6M0J)_10761572_uff_E=428.30	-6.4	0	0
ACE2(6M0J)_102239942_uff_E=477.31	-6.4	0	0
ACE2(6M0J)_118254083_uff_E=620.90	-6.4	0	0
ACE2(6M0J)_118254219_uff_E=599.83	-6.4	0	0
ACE2(6M0J)_118263237_uff_E=588.21	-6.4	0	0
ACE2(6M0J)_118263243_uff_E=326.16	-6.4	0	0
ACE2(6M0J)_123825667_uff_E=368.14	-6.4	0	0
ACE2(6M0J)_124301776_uff_E=496.28	-6.4	0	0
ACE2(6M0J)_125428702_uff_E=552.27	-6.4	0	0
ACE2(6M0J)_125429177_uff_E=507.62	-6.4	0	0
ACE2(6M0J)_129603774_uff_E=553.99	-6.4	0	0
ACE2(6M0J)_129895176_uff_E=504.54	-6.4	0	0
ACE2(6M0J)_131975182_uff_E=561.17	-6.4	0	0
ACE2(6M0J)_137467367_uff_E=372.94	-6.4	0	0
ACE2(6M0J)_137467524_uff_E=386.34	-6.4	0	0
ACE2(6M0J)_137467528_uff_E=393.76	-6.4	0	0
ACE2(6M0J)_46844023_uff_E=474.74	-6.4	0	0
ACE2(6M0J)_46844079_uff_E=544.43	-6.4	0	0
ACE2(6M0J)_6452395_uff_E=485.14	-6.4	0	0
ACE2(6M0J)_70870984_uff_E=487.13	-6.4	0	0
ACE2(6M0J)_73330625_uff_E=631.30	-6.4	0	0
ACE2(6M0J)_98125634_uff_E=613.87	-6.4	0	0
ACE2(6M0J)_98125635_uff_E=587.84	-6.4	0	0
ACE2(6M0J)_10596108_uff_E=425.76	-6.3	0	0
ACE2(6M0J)_118263231_uff_E=574.80	-6.3	0	0
ACE2(6M0J)_118263241_uff_E=578.46	-6.3	0	0
ACE2(6M0J)_123293391_uff_E=636.92	-6.3	0	0
ACE2(6M0J)_125427758_uff_E=519.13	-6.3	0	0
ACE2(6M0J)_125429127_uff_E=505.08	-6.3	0	0
ACE2(6M0J)_125429427_uff_E=542.77	-6.3	0	0
ACE2(6M0J)_125429497_uff_E=567.88	-6.3	0	0
ACE2(6M0J)_129895205_uff_E=525.50	-6.3	0	0
ACE2(6M0J)_132285940_uff_E=519.13	-6.3	0	0
ACE2(6M0J)_132285949_uff_E=530.49	-6.3	0	0
ACE2(6M0J)_132286496_uff_E=560.09	-6.3	0	0
ACE2(6M0J)_44139590_uff_E=680.31	-6.3	0	0
ACE2(6M0J)_46843963_uff_E=502.61	-6.3	0	0
ACE2(6M0J)_46844137_uff_E=493.79	-6.3	0	0
ACE2(6M0J)_70876805_uff_E=498.65	-6.3	0	0
ACE2(6M0J)_73331344_uff_E=637.78	-6.3	0	0
ACE2(6M0J)_101288398_uff_E=438.73	-6.2	0	0
ACE2(6M0J)_102066899_uff_E=443.95	-6.2	0	0
ACE2(6M0J)_10668598_uff_E=474.70	-6.2	0	0
ACE2(6M0J)_10690292_uff_E=457.16	-6.2	0	0
ACE2(6M0J)_10785158_uff_E=562.11	-6.2	0	0
ACE2(6M0J)_10810786_uff_E=493.34	-6.2	0	0
ACE2(6M0J)_118218025_uff_E=467.72	-6.2	0	0
ACE2(6M0J)_118254216_uff_E=633.63	-6.2	0	0
ACE2(6M0J)_118263246_uff_E=636.92	-6.2	0	0
ACE2(6M0J)_124301775_uff_E=494.73	-6.2	0	0
ACE2(6M0J)_125428416_uff_E=475.88	-6.2	0	0
ACE2(6M0J)_125429426_uff_E=525.50	-6.2	0	0
ACE2(6M0J)_129895443_uff_E=507.32	-6.2	0	0
ACE2(6M0J)_13735050_uff_E=749.67	-6.2	0	0
ACE2(6M0J)_15086460_uff_E=467.63	-6.2	0	0
ACE2(6M0J)_23955821_uff_E=351.99	-6.2	0	0
ACE2(6M0J)_25171633_uff_E=466.90	-6.2	0	0
ACE2(6M0J)_46843961_uff_E=566.24	-6.2	0	0
ACE2(6M0J)_46844083_uff_E=525.07	-6.2	0	0
ACE2(6M0J)_56950844_uff_E=501.37	-6.2	0	0
ACE2(6M0J)_620374_uff_E=372.95	-6.2	0	0
ACE2(6M0J)_626596_uff_E=481.66	-6.2	0	0
ACE2(6M0J)_73330911_uff_E=636.92	-6.2	0	0
ACE2(6M0J)_90958864_uff_E=541.66	-6.2	0	0
ACE2(6M0J)_95988133_uff_E=478.45	-6.2	0	0
ACE2(6M0J)_10045461_uff_E=524.59	-6.1	0	0
ACE2(6M0J)_101749852_uff_E=396.61	-6.1	0	0
ACE2(6M0J)_102066898_uff_E=415.66	-6.1	0	0
ACE2(6M0J)_10406626_uff_E=512.41	-6.1	0	0
ACE2(6M0J)_10407853_uff_E=504.30	-6.1	0	0
ACE2(6M0J)_10643661_uff_E=493.88	-6.1	0	0
ACE2(6M0J)_10687333_uff_E=410.19	-6.1	0	0
ACE2(6M0J)_10712095_uff_E=399.63	-6.1	0	0
ACE2(6M0J)_10810923_uff_E=477.96	-6.1	0	0
ACE2(6M0J)_11794329_uff_E=432.53	-6.1	0	0
ACE2(6M0J)_118207010_uff_E=1815.50	-6.1	0	0
ACE2(6M0J)_118254182_uff_E=641.96	-6.1	0	0
ACE2(6M0J)_118254213_uff_E=644.51	-6.1	0	0
ACE2(6M0J)_118263228_uff_E=472.25	-6.1	0	0
ACE2(6M0J)_118263250_uff_E=523.14	-6.1	0	0
ACE2(6M0J)_123350254_uff_E=1809.62	-6.1	0	0
ACE2(6M0J)_124024037_uff_E=377.64	-6.1	0	0
ACE2(6M0J)_125428749_uff_E=493.62	-6.1	0	0
ACE2(6M0J)_125429498_uff_E=568.24	-6.1	0	0
ACE2(6M0J)_125429985_uff_E=511.44	-6.1	0	0
ACE2(6M0J)_125429986_uff_E=507.32	-6.1	0	0
ACE2(6M0J)_131770040_uff_E=354.57	-6.1	0	0
ACE2(6M0J)_132286322_uff_E=531.16	-6.1	0	0
ACE2(6M0J)_138514465_uff_E=385.97	-6.1	0	0
ACE2(6M0J)_25171637_uff_E=456.94	-6.1	0	0
ACE2(6M0J)_25172057_uff_E=459.89	-6.1	0	0
ACE2(6M0J)_44566068_uff_E=401.62	-6.1	0	0
ACE2(6M0J)_46843964_uff_E=523.87	-6.1	0	0
ACE2(6M0J)_46844024_uff_E=467.06	-6.1	0	0
ACE2(6M0J)_5126442_uff_E=412.73	-6.1	0	0
ACE2(6M0J)_56691266_uff_E=482.23	-6.1	0	0
ACE2(6M0J)_57393956_uff_E=482.31	-6.1	0	0
ACE2(6M0J)_57397526_uff_E=321.86	-6.1	0	0
ACE2(6M0J)_72726987_uff_E=607.92	-6.1	0	0
ACE2(6M0J)_73331347_uff_E=651.09	-6.1	0	0
ACE2(6M0J)_75641496_uff_E=414.15	-6.1	0	0
ACE2(6M0J)_76970921_uff_E=483.51	-6.1	0	0
ACE2(6M0J)_95988134_uff_E=482.23	-6.1	0	0
ACE2(6M0J)_98058927_uff_E=293.39	-6.1	0	0
ACE2(6M0J)_10019062_uff_E=415.66	-6	0	0
ACE2(6M0J)_10619960_uff_E=518.46	-6	0	0
ACE2(6M0J)_10642700_uff_E=509.25	-6	0	0
ACE2(6M0J)_10715802_uff_E=497.31	-6	0	0
ACE2(6M0J)_10763672_uff_E=488.17	-6	0	0
ACE2(6M0J)_10787864_uff_E=481.64	-6	0	0
ACE2(6M0J)_118254099_uff_E=523.14	-6	0	0
ACE2(6M0J)_118263244_uff_E=641.96	-6	0	0
ACE2(6M0J)_118263245_uff_E=614.68	-6	0	0
ACE2(6M0J)_118267097_uff_E=473.76	-6	0	0
ACE2(6M0J)_118267131_uff_E=382.54	-6	0	0
ACE2(6M0J)_123282608_uff_E=523.14	-6	0	0
ACE2(6M0J)_123836216_uff_E=631.96	-6	0	0
ACE2(6M0J)_125429419_uff_E=537.90	-6	0	0
ACE2(6M0J)_125429840_uff_E=506.48	-6	0	0
ACE2(6M0J)_129895030_uff_E=475.88	-6	0	0
ACE2(6M0J)_131964492_uff_E=498.10	-6	0	0
ACE2(6M0J)_131975184_uff_E=547.56	-6	0	0
ACE2(6M0J)_137652147_uff_E=534.82	-6	0	0
ACE2(6M0J)_14067764_uff_E=703.84	-6	0	0
ACE2(6M0J)_14737140_uff_E=464.56	-6	0	0
ACE2(6M0J)_44139586_uff_E=530.12	-6	0	0
ACE2(6M0J)_46843962_uff_E=816.62	-6	0	0
ACE2(6M0J)_56924745_uff_E=399.54	-6	0	0
ACE2(6M0J)_56950843_uff_E=482.15	-6	0	0
ACE2(6M0J)_57390407_uff_E=486.36	-6	0	0
ACE2(6M0J)_617713_uff_E=360.61	-6	0	0
ACE2(6M0J)_71777464_uff_E=374.80	-6	0	0
ACE2(6M0J)_76973167_uff_E=599.22	-6	0	0
ACE2(6M0J)_92222232_uff_E=435.92	-6	0	0
ACE2(6M0J)_98058926_uff_E=284.11	-6	0	0
ACE2(6M0J)_101592382_uff_E=439.16	-5.9	0	0
ACE2(6M0J)_10497262_uff_E=397.63	-5.9	0	0
ACE2(6M0J)_10687333_uff_E=410.19	-5.9	0	0
ACE2(6M0J)_10785158_uff_E=562.11	-5.9	0	0
ACE2(6M0J)_118254145_uff_E=558.28	-5.9	0	0
ACE2(6M0J)_118267046_uff_E=447.92	-5.9	0	0
ACE2(6M0J)_118267096_uff_E=623.75	-5.9	0	0
ACE2(6M0J)_123704177_uff_E=624.00	-5.9	0	0
ACE2(6M0J)_123846923_uff_E=605.00	-5.9	0	0
ACE2(6M0J)_129895373_uff_E=537.90	-5.9	0	0
ACE2(6M0J)_132286090_uff_E=475.88	-5.9	0	0
ACE2(6M0J)_132286340_uff_E=569.38	-5.9	0	0
ACE2(6M0J)_132286457_uff_E=528.62	-5.9	0	0
ACE2(6M0J)_135027778_uff_E=580.27	-5.9	0	0
ACE2(6M0J)_138514334_uff_E=388.58	-5.9	0	0
ACE2(6M0J)_144564153_uff_E=641.96	-5.9	0	0
ACE2(6M0J)_14565581_uff_E=465.26	-5.9	0	0
ACE2(6M0J)_146559679_uff_E=391.25	-5.9	0	0
ACE2(6M0J)_20841686_uff_E=406.51	-5.9	0	0
ACE2(6M0J)_23424082_uff_E=486.48	-5.9	0	0
ACE2(6M0J)_23424319_uff_E=490.69	-5.9	0	0
ACE2(6M0J)_44139587_uff_E=1748.94	-5.9	0	0
ACE2(6M0J)_44139588_uff_E=509.86	-5.9	0	0
ACE2(6M0J)_44148513_uff_E=442.54	-5.9	0	0
ACE2(6M0J)_44565921_uff_E=420.30	-5.9	0	0
ACE2(6M0J)_44566031_uff_E=562.36	-5.9	0	0
ACE2(6M0J)_46843899_uff_E=466.21	-5.9	0	0
ACE2(6M0J)_566721_uff_E=474.85	-5.9	0	0
ACE2(6M0J)_617268_uff_E=361.47	-5.9	0	0
ACE2(6M0J)_620370_uff_E=467.26	-5.9	0	0
ACE2(6M0J)_622712_uff_E=363.04	-5.9	0	0
ACE2(6M0J)_630845_uff_E=373.54	-5.9	0	0
ACE2(6M0J)_71317160_uff_E=364.50	-5.9	0	0
ACE2(6M0J)_71318422_uff_E=595.64	-5.9	0	0
ACE2(6M0J)_71763717_uff_E=465.30	-5.9	0	0
ACE2(6M0J)_71764910_uff_E=531.32	-5.9	0	0
ACE2(6M0J)_73331490_uff_E=626.42	-5.9	0	0
ACE2(6M0J)_75218801_uff_E=494.49	-5.9	0	0
ACE2(6M0J)_98058924_uff_E=293.41	-5.9	0	0
ACE2(6M0J)_11603327_uff_E=498.67	-5.8	0	0
ACE2(6M0J)_101592379_uff_E=353.83	-5.8	0	0
ACE2(6M0J)_10623284_uff_E=545.80	-5.8	0	0
ACE2(6M0J)_10693960_uff_E=552.84	-5.8	0	0
ACE2(6M0J)_118254103_uff_E=631.96	-5.8	0	0
ACE2(6M0J)_118263233_uff_E=562.91	-5.8	0	0
ACE2(6M0J)_118263242_uff_E=1835.61	-5.8	0	0
ACE2(6M0J)_118267049_uff_E=466.20	-5.8	0	0
ACE2(6M0J)_123361815_uff_E=380.82	-5.8	0	0
ACE2(6M0J)_123872201_uff_E=1875.00	-5.8	0	0
ACE2(6M0J)_125427757_uff_E=524.66	-5.8	0	0
ACE2(6M0J)_127053184_uff_E=568.68	-5.8	0	0
ACE2(6M0J)_133688441_uff_E=267.44	-5.8	0	0
ACE2(6M0J)_137641183_uff_E=530.84	-5.8	0	0
ACE2(6M0J)_138490235_uff_E=829.78	-5.8	0	0
ACE2(6M0J)_138514336_uff_E=331.78	-5.8	0	0
ACE2(6M0J)_138514463_uff_E=391.15	-5.8	0	0
ACE2(6M0J)_142550537_uff_E=823.03	-5.8	0	0
ACE2(6M0J)_144564061_uff_E=397.26	-5.8	0	0
ACE2(6M0J)_144564119_uff_E=511.99	-5.8	0	0
ACE2(6M0J)_144564145_uff_E=652.83	-5.8	0	0
ACE2(6M0J)_153989287_uff_E=412.33	-5.8	0	0
ACE2(6M0J)_21677662_uff_E=400.18	-5.8	0	0
ACE2(6M0J)_23424321_uff_E=494.61	-5.8	0	0
ACE2(6M0J)_25171635_uff_E=456.32	-5.8	0	0
ACE2(6M0J)_298140_uff_E=400.18	-5.8	0	0
ACE2(6M0J)_56950842_uff_E=522.07	-5.8	0	0
ACE2(6M0J)_57395698_uff_E=490.56	-5.8	0	0
ACE2(6M0J)_586839_uff_E=882.59	-5.8	0	0
ACE2(6M0J)_592609_uff_E=494.95	-5.8	0	0
ACE2(6M0J)_611914_uff_E=389.12	-5.8	0	0
ACE2(6M0J)_611918_uff_E=475.46	-5.8	0	0
ACE2(6M0J)_612127_uff_E=488.19	-5.8	0	0
ACE2(6M0J)_620242_uff_E=487.43	-5.8	0	0
ACE2(6M0J)_620360_uff_E=444.66	-5.8	0	0
ACE2(6M0J)_629676_uff_E=362.11	-5.8	0	0
ACE2(6M0J)_71764911_uff_E=490.07	-5.8	0	0
ACE2(6M0J)_73053256_uff_E=792.96	-5.8	0	0
ACE2(6M0J)_73331628_uff_E=624.00	-5.8	0	0
ACE2(6M0J)_75218847_uff_E=520.97	-5.8	0	0
ACE2(6M0J)_98058925_uff_E=284.04	-5.8	0	0
ACE2(6M0J)_98125637_uff_E=650.71	-5.8	0	0
ACE2(6M0J)_10097_uff_E=554.35	-5.7	0	0
ACE2(6M0J)_10621755_uff_E=626.37	-5.7	0	0
ACE2(6M0J)_10642700_uff_E=509.25	-5.7	0	0
ACE2(6M0J)_10668598_uff_E=474.70	-5.7	0	0
ACE2(6M0J)_10690292_uff_E=457.16	-5.7	0	0
ACE2(6M0J)_10691458_uff_E=474.28	-5.7	0	0
ACE2(6M0J)_10761572_uff_E=428.30	-5.7	0	0
ACE2(6M0J)_118254190_uff_E=511.99	-5.7	0	0
ACE2(6M0J)_118263247_uff_E=624.00	-5.7	0	0
ACE2(6M0J)_118263251_uff_E=515.77	-5.7	0	0
ACE2(6M0J)_127253416_uff_E=553.99	-5.7	0	0
ACE2(6M0J)_129603773_uff_E=563.30	-5.7	0	0
ACE2(6M0J)_129894893_uff_E=493.62	-5.7	0	0
ACE2(6M0J)_132286528_uff_E=486.36	-5.7	0	0
ACE2(6M0J)_139588134_uff_E=457.99	-5.7	0	0
ACE2(6M0J)_142550538_uff_E=347.64	-5.7	0	0
ACE2(6M0J)_148240297_uff_E=338.09	-5.7	0	0
ACE2(6M0J)_195521_uff_E=426.42	-5.7	0	0
ACE2(6M0J)_21677661_uff_E=485.34	-5.7	0	0
ACE2(6M0J)_25171428_uff_E=435.54	-5.7	0	0
ACE2(6M0J)_25171636_uff_E=493.57	-5.7	0	0
ACE2(6M0J)_253250_uff_E=428.28	-5.7	0	0
ACE2(6M0J)_3082005_uff_E=446.17	-5.7	0	0
ACE2(6M0J)_31336_uff_E=499.84	-5.7	0	0
ACE2(6M0J)_44139468_uff_E=480.55	-5.7	0	0
ACE2(6M0J)_44566064_uff_E=432.11	-5.7	0	0
ACE2(6M0J)_574586_uff_E=496.46	-5.7	0	0
ACE2(6M0J)_620368_uff_E=417.12	-5.7	0	0
ACE2(6M0J)_620371_uff_E=498.25	-5.7	0	0
ACE2(6M0J)_68727568_uff_E=497.72	-5.7	0	0
ACE2(6M0J)_91109362_uff_E=525.20	-5.7	0	0
ACE2(6M0J)_95988135_uff_E=481.81	-5.7	0	0
ACE2(6M0J)_978395_uff_E=436.39	-5.7	0	0
ACE2(6M0J)_101749855_uff_E=354.12	-5.6	0	0
ACE2(6M0J)_10715802_uff_E=497.31	-5.6	0	0
ACE2(6M0J)_10787978_uff_E=533.30	-5.6	0	0
ACE2(6M0J)_118254246_uff_E=635.83	-5.6	0	0
ACE2(6M0J)_118263264_uff_E=1066.87	-5.6	0	0
ACE2(6M0J)_118267042_uff_E=443.73	-5.6	0	0
ACE2(6M0J)_118267052_uff_E=464.23	-5.6	0	0
ACE2(6M0J)_123396595_uff_E=400.61	-5.6	0	0
ACE2(6M0J)_125428703_uff_E=526.27	-5.6	0	0
ACE2(6M0J)_138496616_uff_E=483.72	-5.6	0	0
ACE2(6M0J)_142550519_uff_E=411.61	-5.6	0	0
ACE2(6M0J)_14565584_uff_E=434.46	-5.6	0	0
ACE2(6M0J)_14589761_uff_E=525.45	-5.6	0	0
ACE2(6M0J)_154593892_uff_E=383.60	-5.6	0	0
ACE2(6M0J)_23424433_uff_E=500.83	-5.6	0	0
ACE2(6M0J)_46844022_uff_E=503.08	-5.6	0	0
ACE2(6M0J)_51401507_uff_E=420.77	-5.6	0	0
ACE2(6M0J)_57397525_uff_E=364.21	-5.6	0	0
ACE2(6M0J)_586858_uff_E=517.53	-5.6	0	0
ACE2(6M0J)_70658189_uff_E=385.06	-5.6	0	0
ACE2(6M0J)_71318420_uff_E=519.02	-5.6	0	0
ACE2(6M0J)_71737790_uff_E=419.80	-5.6	0	0
ACE2(6M0J)_73330763_uff_E=714.76	-5.6	0	0
ACE2(6M0J)_73330910_uff_E=648.69	-5.6	0	0
ACE2(6M0J)_73331346_uff_E=611.27	-5.6	0	0
ACE2(6M0J)_85199072_uff_E=427.63	-5.6	0	0
ACE2(6M0J)_95988136_uff_E=478.36	-5.6	0	0
ACE2(6M0J)_10019062_uff_E=415.66	-5.5	0	0
ACE2(6M0J)_101288398_uff_E=438.73	-5.5	0	0
ACE2(6M0J)_10596108_uff_E=425.76	-5.5	0	0
ACE2(6M0J)_118207067_uff_E=773.99	-5.5	0	0
ACE2(6M0J)_118263272_uff_E=1079.99	-5.5	0	0
ACE2(6M0J)_118267073_uff_E=557.12	-5.5	0	0
ACE2(6M0J)_124307480_uff_E=353.26	-5.5	0	0
ACE2(6M0J)_142550524_uff_E=360.94	-5.5	0	0
ACE2(6M0J)_14565583_uff_E=446.70	-5.5	0	0
ACE2(6M0J)_14565585_uff_E=471.35	-5.5	0	0
ACE2(6M0J)_153852917_uff_E=321.39	-5.5	0	0
ACE2(6M0J)_195522_uff_E=471.34	-5.5	0	0
ACE2(6M0J)_25171426_uff_E=435.36	-5.5	0	0
ACE2(6M0J)_44565974_uff_E=433.18	-5.5	0	0
ACE2(6M0J)_44566065_uff_E=441.34	-5.5	0	0
ACE2(6M0J)_46843965_uff_E=501.88	-5.5	0	0
ACE2(6M0J)_56924746_uff_E=397.29	-5.5	0	0
ACE2(6M0J)_56950704_uff_E=442.06	-5.5	0	0
ACE2(6M0J)_5702061_uff_E=436.39	-5.5	0	0
ACE2(6M0J)_68727702_uff_E=407.12	-5.5	0	0
ACE2(6M0J)_73331349_uff_E=627.67	-5.5	0	0
ACE2(6M0J)_75218824_uff_E=483.43	-5.5	0	0
ACE2(6M0J)_76964619_uff_E=417.09	-5.5	0	0
ACE2(6M0J)_76973812_uff_E=262.34	-5.5	0	0
ACE2(6M0J)_89054741_uff_E=556.64	-5.5	0	0
ACE2(6M0J)_92860931_uff_E=404.45	-5.5	0	0
ACE2(6M0J)_978391_uff_E=427.59	-5.5	0	0
ACE2(6M0J)_98125636_uff_E=608.30	-5.5	0	0
ACE2(6M0J)_9974417_uff_E=422.04	-5.5	0	0
ACE2(6M0J)_101749852_uff_E=396.61	-5.4	0	0
ACE2(6M0J)_101749855_uff_E=354.12	-5.4	0	0
ACE2(6M0J)_10497262_uff_E=397.63	-5.4	0	0
ACE2(6M0J)_10787864_uff_E=481.64	-5.4	0	0
ACE2(6M0J)_10837041_uff_E=552.85	-5.4	0	0
ACE2(6M0J)_118254227_uff_E=641.19	-5.4	0	0
ACE2(6M0J)_118263248_uff_E=603.75	-5.4	0	0
ACE2(6M0J)_118263273_uff_E=1882.98	-5.4	0	0
ACE2(6M0J)_122400012_uff_E=584.80	-5.4	0	0
ACE2(6M0J)_125428417_uff_E=471.95	-5.4	0	0
ACE2(6M0J)_129010273_uff_E=436.64	-5.4	0	0
ACE2(6M0J)_131964505_uff_E=399.09	-5.4	0	0
ACE2(6M0J)_139584816_uff_E=463.51	-5.4	0	0
ACE2(6M0J)_176431_uff_E=457.70	-5.4	0	0
ACE2(6M0J)_25171427_uff_E=451.54	-5.4	0	0
ACE2(6M0J)_25171632_uff_E=683.46	-5.4	0	0
ACE2(6M0J)_25171634_uff_E=425.00	-5.4	0	0
ACE2(6M0J)_25171846_uff_E=442.12	-5.4	0	0
ACE2(6M0J)_25171847_uff_E=476.88	-5.4	0	0
ACE2(6M0J)_3512_uff_E=436.39	-5.4	0	0
ACE2(6M0J)_40455568_uff_E=387.73	-5.4	0	0
ACE2(6M0J)_4125561_uff_E=421.60	-5.4	0	0
ACE2(6M0J)_44566078_uff_E=549.87	-5.4	0	0
ACE2(6M0J)_57392201_uff_E=381.98	-5.4	0	0
ACE2(6M0J)_631655_uff_E=461.61	-5.4	0	0
ACE2(6M0J)_73330762_uff_E=621.15	-5.4	0	0
ACE2(6M0J)_73330764_uff_E=710.57	-5.4	0	0
ACE2(6M0J)_73331205_uff_E=629.44	-5.4	0	0
ACE2(6M0J)_75218825_uff_E=478.84	-5.4	0	0
ACE2(6M0J)_84820866_uff_E=608.30	-5.4	0	0
ACE2(6M0J)_89798228_uff_E=373.07	-5.4	0	0
ACE2(6M0J)_91564943_uff_E=503.49	-5.4	0	0
ACE2(6M0J)_92222230_uff_E=438.23	-5.4	0	0
ACE2(6M0J)_941385_uff_E=474.79	-5.4	0	0
ACE2(6M0J)_99908084_uff_E=713.20	-5.4	0	0
ACE2(6M0J)_10810923_uff_E=477.96	-5.3	0	0
ACE2(6M0J)_118254179_uff_E=699.45	-5.3	0	0
ACE2(6M0J)_131964498_uff_E=431.93	-5.3	0	0
ACE2(6M0J)_134126306_uff_E=422.13	-5.3	0	0
ACE2(6M0J)_134126307_uff_E=430.18	-5.3	0	0
ACE2(6M0J)_137467368_uff_E=441.10	-5.3	0	0
ACE2(6M0J)_137647518_uff_E=469.45	-5.3	0	0
ACE2(6M0J)_14565587_uff_E=489.93	-5.3	0	0
ACE2(6M0J)_14589751_uff_E=447.75	-5.3	0	0
ACE2(6M0J)_14760418_uff_E=350.88	-5.3	0	0
ACE2(6M0J)_154178022_uff_E=368.39	-5.3	0	0
ACE2(6M0J)_161302_uff_E=363.38	-5.3	0	0
ACE2(6M0J)_23424318_uff_E=443.60	-5.3	0	0
ACE2(6M0J)_23424413_uff_E=399.30	-5.3	0	0
ACE2(6M0J)_25171430_uff_E=1688.83	-5.3	0	0
ACE2(6M0J)_46844138_uff_E=498.83	-5.3	0	0
ACE2(6M0J)_6604225_uff_E=488.78	-5.3	0	0
ACE2(6M0J)_73331629_uff_E=624.62	-5.3	0	0
ACE2(6M0J)_76968174_uff_E=424.16	-5.3	0	0
ACE2(6M0J)_91820110_uff_E=337.73	-5.3	0	0
ACE2(6M0J)_92222231_uff_E=448.41	-5.3	0	0
ACE2(6M0J)_98159927_uff_E=447.95	-5.3	0	0
ACE2(6M0J)_102066898_uff_E=415.66	-5.2	0	0
ACE2(6M0J)_10406626_uff_E=512.41	-5.2	0	0
ACE2(6M0J)_10407853_uff_E=504.30	-5.2	0	0
ACE2(6M0J)_10619960_uff_E=518.46	-5.2	0	0
ACE2(6M0J)_10763672_uff_E=488.17	-5.2	0	0
ACE2(6M0J)_11603327_uff_E=498.67	-5.2	0	0
ACE2(6M0J)_137658162_uff_E=447.07	-5.2	0	0
ACE2(6M0J)_14565589_uff_E=493.87	-5.2	0	0
ACE2(6M0J)_14589753_uff_E=472.14	-5.2	0	0
ACE2(6M0J)_147554572_uff_E=341.50	-5.2	0	0
ACE2(6M0J)_21820746_uff_E=391.93	-5.2	0	0
ACE2(6M0J)_22216755_uff_E=505.61	-5.2	0	0
ACE2(6M0J)_25171429_uff_E=423.15	-5.2	0	0
ACE2(6M0J)_441140_uff_E=466.49	-5.2	0	0
ACE2(6M0J)_44565973_uff_E=439.63	-5.2	0	0
ACE2(6M0J)_44566051_uff_E=374.99	-5.2	0	0
ACE2(6M0J)_44566076_uff_E=484.63	-5.2	0	0
ACE2(6M0J)_6713927_uff_E=497.21	-5.2	0	0
ACE2(6M0J)_71312580_uff_E=422.79	-5.2	0	0
ACE2(6M0J)_71317161_uff_E=422.79	-5.2	0	0
ACE2(6M0J)_75218823_uff_E=527.02	-5.2	0	0
ACE2(6M0J)_75218864_uff_E=499.12	-5.2	0	0
ACE2(6M0J)_98159926_uff_E=475.82	-5.2	0	0
ACE2(6M0J)_101592382_uff_E=439.16	-5.1	0	0
ACE2(6M0J)_102066899_uff_E=443.95	-5.1	0	0
ACE2(6M0J)_10810786_uff_E=493.34	-5.1	0	0
ACE2(6M0J)_11794329_uff_E=432.53	-5.1	0	0
ACE2(6M0J)_131964506_uff_E=573.49	-5.1	0	0
ACE2(6M0J)_137467397_uff_E=418.62	-5.1	0	0
ACE2(6M0J)_144564067_uff_E=408.10	-5.1	0	0
ACE2(6M0J)_14706665_uff_E=484.89	-5.1	0	0
ACE2(6M0J)_153852916_uff_E=343.22	-5.1	0	0
ACE2(6M0J)_154388188_uff_E=342.57	-5.1	0	0
ACE2(6M0J)_71043635_uff_E=1668.80	-5.1	0	0
ACE2(6M0J)_91035900_uff_E=505.87	-5.1	0	0
ACE2(6M0J)_92222233_uff_E=448.40	-5.1	0	0
ACE2(6M0J)_10045461_uff_E=524.59	-5	0	0
ACE2(6M0J)_23424320_uff_E=445.80	-5	0	0
ACE2(6M0J)_74426566_uff_E=467.72	-5	0	0
ACE2(6M0J)_10643661_uff_E=493.88	-4.9	0	0
ACE2(6M0J)_10712095_uff_E=399.63	-4.9	0	0
ACE2(6M0J)_14589759_uff_E=441.86	-4.9	0	0
ACE2(6M0J)_119091269_uff_E=287.41	-4.8	0	0
ACE2(6M0J)_122400007_uff_E=563.29	-4.8	0	0
ACE2(6M0J)_44566077_uff_E=490.23	-4.8	0	0
ACE2(6M0J)_129895087_uff_E=526.27	-4.7	0	0
ACE2(6M0J)_68024713_uff_E=427.25	-4.7	0	0
ACE2(6M0J)_73331772_uff_E=586.44	-4.7	0	0
ACE2(6M0J)_123214764_uff_E=687.85	-4.6	0	0
ACE2(6M0J)_289550_uff_E=239.38	-4.6	0	0
ACE2(6M0J)_132286165_uff_E=526.02	-4.3	0	0
ACE2(6M0J)_73330912_uff_E=647.29	-4.2	0	0
ACE2(6M0J)_73331488_uff_E=637.67	-4.2	0	0
ACE2(6M0J)_125429420_uff_E=541.67	-3	0	0
ACE2(6M0J)_132285856_uff_E=542.41	-2.3	0	0
ACE2(6M0J)_4125561_uff_E=421.60	-5.1	0.653	0.653
ACE2(6M0J)_6604225_uff_E=488.78	-5.2	0.803	0.798
ACE2(6M0J)_92860931_uff_E=404.45	-5.1	0.815	0.815
ACE2(6M0J)_23424319_uff_E=490.69	-4.5	0.831	0.802
ACE2(6M0J)_118263244_uff_E=641.96	-5.9	0.885	0.309
ACE2(6M0J)_92860931_uff_E=404.45	-5.3	0.938	0.895
ACE2(6M0J)_4125561_uff_E=421.60	-4.7	1.1	1.074
ACE2(6M0J)_147116578_uff_E=520.21	-6.6	1.103	0.753
ACE2(6M0J)_118254145_uff_E=558.28	-4.9	1.126	1.08
ACE2(6M0J)_92222230_uff_E=438.23	-4.6	1.21	1.185
ACE2(6M0J)_118263228_uff_E=472.25	-5.7	1.22	1.093
ACE2(6M0J)_137467528_uff_E=393.76	-5.4	1.242	1.089
ACE2(6M0J)_14565585_uff_E=471.35	-5.3	1.249	1.074
ACE2(6M0J)_118254179_uff_E=699.45	-5.1	1.254	1.169
ACE2(6M0J)_125429985_uff_E=511.44	-5.8	1.276	1.07
ACE2(6M0J)_73331487_uff_E=640.93	-6.3	1.288	1.172
ACE2(6M0J)_123282608_uff_E=523.14	-5.2	1.288	1.219
ACE2(6M0J)_73331348_uff_E=633.58	-6.2	1.313	0.998
ACE2(6M0J)_98125637_uff_E=650.71	-3.5	1.341	1.11
ACE2(6M0J)_138514336_uff_E=331.78	-5.7	1.356	1.23
ACE2(6M0J)_10596108_uff_E=425.76	-5.2	1.362	1.297
ACE2(6M0J)_44148513_uff_E=442.54	-5	1.379	1.323
ACE2(6M0J)_612127_uff_E=488.19	-5.4	1.405	1.355
ACE2(6M0J)_10693960_uff_E=552.84	-5.4	1.408	1.054
ACE2(6M0J)_14565583_uff_E=446.70	-5	1.408	1.317
ACE2(6M0J)_10761572_uff_E=428.30	-5.5	1.487	1.424
ACE2(6M0J)_118267042_uff_E=443.73	-5.1	1.488	1.404
ACE2(6M0J)_14565583_uff_E=446.70	-5.3	1.496	1.38
ACE2(6M0J)_3512_uff_E=436.39	-5.2	1.514	1.412
ACE2(6M0J)_71317160_uff_E=364.50	-5.7	1.515	1.354
ACE2(6M0J)_298140_uff_E=400.18	-5	1.533	1.369
ACE2(6M0J)_73330766_uff_E=651.99	-6.5	1.55	1.415
ACE2(6M0J)_71318420_uff_E=519.02	-5.4	1.565	1.025
ACE2(6M0J)_253250_uff_E=428.28	-5.5	1.566	1.484
ACE2(6M0J)_142550537_uff_E=823.03	-5.4	1.567	1.339
ACE2(6M0J)_129603773_uff_E=563.30	-5.7	1.576	1.395
ACE2(6M0J)_10668598_uff_E=474.70	-5.5	1.607	1.496
ACE2(6M0J)_123836216_uff_E=631.96	-6	1.641	1.404
ACE2(6M0J)_73331060_uff_E=634.29	-6.4	1.642	1.283
ACE2(6M0J)_10045461_uff_E=524.59	-4.8	1.651	1.477
ACE2(6M0J)_23424318_uff_E=443.60	-5	1.655	1.479
ACE2(6M0J)_99908084_uff_E=713.20	-4.4	1.658	1.221
ACE2(6M0J)_73330912_uff_E=647.29	-2.8	1.66	1.491
ACE2(6M0J)_44566076_uff_E=484.63	-4.7	1.661	1.507
ACE2(6M0J)_101288398_uff_E=438.73	-4.6	1.665	1.445
ACE2(6M0J)_46843962_uff_E=816.62	-5.9	1.668	1.33
ACE2(6M0J)_10761572_uff_E=428.30	-5	1.683	1.563
ACE2(6M0J)_10691458_uff_E=474.28	-5.6	1.686	1.61
ACE2(6M0J)_125429498_uff_E=568.24	-4	1.698	1.437
ACE2(6M0J)_118254099_uff_E=523.14	-4.4	1.725	1.554
ACE2(6M0J)_125428702_uff_E=552.27	-5.9	1.741	1.305
ACE2(6M0J)_123214764_uff_E=687.85	-4.6	1.742	0.515
ACE2(6M0J)_70876805_uff_E=498.65	-5.5	1.748	1.595
ACE2(6M0J)_102066898_uff_E=415.66	-4.4	1.752	1.627
ACE2(6M0J)_73331628_uff_E=624.00	-4.9	1.757	1.333
ACE2(6M0J)_125428750_uff_E=537.29	-4.4	1.762	1.542
ACE2(6M0J)_71737790_uff_E=419.80	-4.3	1.762	1.482
ACE2(6M0J)_10406626_uff_E=512.41	-5	1.772	1.504
ACE2(6M0J)_138514463_uff_E=391.15	-5.7	1.788	1.542
ACE2(6M0J)_71763717_uff_E=465.30	-5	1.789	1.641
ACE2(6M0J)_131964492_uff_E=498.10	-5.7	1.793	1.471
ACE2(6M0J)_10497262_uff_E=397.63	-5.6	1.796	1.467
ACE2(6M0J)_21677661_uff_E=485.34	-5	1.813	1.618
ACE2(6M0J)_123350254_uff_E=1809.62	-5	1.826	1.372
ACE2(6M0J)_132286457_uff_E=528.62	-3	1.834	1.048
ACE2(6M0J)_125429427_uff_E=542.77	-3.4	1.838	1.457
ACE2(6M0J)_10623284_uff_E=545.80	-5.6	1.839	1.476
ACE2(6M0J)_129895087_uff_E=526.27	-1.8	1.843	1.404
ACE2(6M0J)_118263247_uff_E=624.00	-4.8	1.845	1.481
ACE2(6M0J)_98125637_uff_E=650.71	-3.7	1.845	1.506
ACE2(6M0J)_71763717_uff_E=465.30	-5.4	1.846	1.531
ACE2(6M0J)_73331205_uff_E=629.44	-4.8	1.847	1.29
ACE2(6M0J)_23424433_uff_E=500.83	-5.2	1.852	1.094
ACE2(6M0J)_56924746_uff_E=397.29	-4.5	1.855	1.61
ACE2(6M0J)_118254232_uff_E=631.91	-5.1	1.861	1.466
ACE2(6M0J)_118254214_uff_E=630.93	-4.3	1.87	1.48
ACE2(6M0J)_71318420_uff_E=519.02	-4.8	1.88	1.303
ACE2(6M0J)_10097_uff_E=554.35	-5.5	1.883	1.614
ACE2(6M0J)_44566031_uff_E=562.36	-5.6	1.891	1.701
ACE2(6M0J)_118263228_uff_E=472.25	-5.4	1.9	1.697
ACE2(6M0J)_76973812_uff_E=262.34	-5.4	1.912	1.609
ACE2(6M0J)_57392201_uff_E=381.98	-5.1	1.924	1.747
ACE2(6M0J)_89054741_uff_E=556.64	-5.1	1.935	0.759
ACE2(6M0J)_21677661_uff_E=485.34	-4.4	1.939	1.683
ACE2(6M0J)_129894893_uff_E=493.62	-2.8	1.947	1.475
ACE2(6M0J)_118263231_uff_E=574.80	-4.9	1.96	1.642
ACE2(6M0J)_10596108_uff_E=425.76	-5.4	1.963	1.763
ACE2(6M0J)_125428703_uff_E=526.27	-4.4	1.965	1.394
ACE2(6M0J)_123836216_uff_E=631.96	-5.8	1.967	1.512
ACE2(6M0J)_592609_uff_E=494.95	-5	1.973	1.817
ACE2(6M0J)_23424433_uff_E=500.83	-5.5	1.976	1.622
ACE2(6M0J)_125429178_uff_E=504.54	-5.9	1.991	1.532
ACE2(6M0J)_121304016	-5.2	2.001	1.34
ACE2(6M0J)_441140_uff_E=466.49	-4.9	2.013	1.795
ACE2(6M0J)_74426566_uff_E=467.72	-4.3	2.019	1.647
ACE2(6M0J)_118254121_uff_E=637.58	-5.5	2.02	1.375
ACE2(6M0J)_21677661_uff_E=485.34	-5.5	2.024	1.721
ACE2(6M0J)_73331347_uff_E=651.09	-4.5	2.031	1.661
ACE2(6M0J)_23424413_uff_E=399.30	-5.1	2.036	1.674
ACE2(6M0J)_176431_uff_E=457.70	-4.8	2.039	1.922
ACE2(6M0J)_10715802_uff_E=497.31	-5.3	2.045	1.672
ACE2(6M0J)_73330766_uff_E=651.99	-3.9	2.047	1.749
ACE2(6M0J)_629676_uff_E=362.11	-5.6	2.048	1.715
ACE2(6M0J)_56950843_uff_E=482.15	-5.9	2.053	1.394
ACE2(6M0J)_118207067_uff_E=773.99	-3.9	2.055	1.686
ACE2(6M0J)_99908084_uff_E=713.20	-4.5	2.056	1.34
ACE2(6M0J)_73053256_uff_E=792.96	-5.4	2.063	1.802
ACE2(6M0J)_10406626_uff_E=512.41	-6	2.066	1.685
ACE2(6M0J)_129895176_uff_E=504.54	-4.4	2.069	1.71
ACE2(6M0J)_129603773_uff_E=563.30	-3.5	2.07	1.594
ACE2(6M0J)_25171427_uff_E=451.54	-4.7	2.074	1.869
ACE2(6M0J)_118254131_uff_E=612.52	-5.1	2.075	1.443
ACE2(6M0J)_144564145_uff_E=652.83	-4.8	2.078	1.6
ACE2(6M0J)_92222233_uff_E=448.40	-4.5	2.079	1.813
ACE2(6M0J)_137467368_uff_E=441.10	-5	2.096	1.738
ACE2(6M0J)_142550537_uff_E=823.03	-4.6	2.096	1.919
ACE2(6M0J)_142550519_uff_E=411.61	-5.5	2.103	1.64
ACE2(6M0J)_131964498_uff_E=431.93	-4.9	2.105	1.806
ACE2(6M0J)_98058927_uff_E=293.39	-5.6	2.107	1.899
ACE2(6M0J)_71763717_uff_E=465.30	-5.3	2.113	1.787
ACE2(6M0J)_125428749_uff_E=493.62	-4.8	2.115	1.522
ACE2(6M0J)_73330911_uff_E=636.92	-5.5	2.116	1.591
ACE2(6M0J)_68727702_uff_E=407.12	-4.9	2.116	1.742
ACE2(6M0J)_121304016	-6.4	2.13	1.233
ACE2(6M0J)_142550524_uff_E=360.94	-4.4	2.132	2.025
ACE2(6M0J)_98058926_uff_E=284.11	-5.6	2.134	1.954
ACE2(6M0J)_10623284_uff_E=545.80	-6	2.149	1.605
ACE2(6M0J)_46843964_uff_E=523.87	-5.9	2.157	1.603
ACE2(6M0J)_68024713_uff_E=427.25	-4.7	2.159	1.358
ACE2(6M0J)_95988135_uff_E=481.81	-4.9	2.16	1.674
ACE2(6M0J)_123396595_uff_E=400.61	-4.8	2.162	1.703
ACE2(6M0J)_132286528_uff_E=486.36	-4.5	2.163	1.676
ACE2(6M0J)_10715802_uff_E=497.31	-4.3	2.168	1.76
ACE2(6M0J)_44139590_uff_E=680.31	-5.1	2.173	1.788
ACE2(6M0J)_138490235_uff_E=829.78	-4.7	2.173	1.992
ACE2(6M0J)_44139468_uff_E=480.55	-5.6	2.174	1.759
ACE2(6M0J)_76968174_uff_E=424.16	-4.4	2.175	1.868
ACE2(6M0J)_73331344_uff_E=637.78	-3.5	2.177	1.806
ACE2(6M0J)_102066898_uff_E=415.66	-5.7	2.178	1.851
ACE2(6M0J)_71317160_uff_E=364.50	-5.6	2.183	1.995
ACE2(6M0J)_123872201_uff_E=1875.00	-4.8	2.193	1.706
ACE2(6M0J)_25171634_uff_E=425.00	-5.1	2.194	1.803
ACE2(6M0J)_586858_uff_E=517.53	-5.2	2.198	1.881
ACE2(6M0J)_118207067_uff_E=773.99	-4.9	2.199	1.814
ACE2(6M0J)_23424433_uff_E=500.83	-4.8	2.203	1.619
ACE2(6M0J)_76973812_uff_E=262.34	-4.7	2.204	1.833
ACE2(6M0J)_10837041_uff_E=552.85	-4.7	2.207	1.552
ACE2(6M0J)_132285856_uff_E=542.41	-2.1	2.207	1.41
ACE2(6M0J)_138514334_uff_E=388.58	-4.8	2.209	1.735
ACE2(6M0J)_57390407_uff_E=486.36	-5.7	2.216	1.895
ACE2(6M0J)_10668598_uff_E=474.70	-5.5	2.217	1.752
ACE2(6M0J)_14565584_uff_E=434.46	-5.1	2.227	1.676
ACE2(6M0J)_132286322_uff_E=531.16	-3.5	2.231	1.493
ACE2(6M0J)_44565974_uff_E=433.18	-4.9	2.234	1.764
ACE2(6M0J)_118263246_uff_E=636.92	-5.8	2.235	1.574
ACE2(6M0J)_118254216_uff_E=633.63	-5.2	2.237	1.617
ACE2(6M0J)_75218823_uff_E=527.02	-4.4	2.238	1.881
ACE2(6M0J)_92222230_uff_E=438.23	-4.3	2.238	1.649
ACE2(6M0J)_123293391_uff_E=636.92	-5.7	2.24	1.505
ACE2(6M0J)_25171632_uff_E=683.46	-4.7	2.24	1.979
ACE2(6M0J)_85199072_uff_E=427.63	-4.4	2.244	1.837
ACE2(6M0J)_129603773_uff_E=563.30	-4.5	2.25	1.715
ACE2(6M0J)_46844083_uff_E=525.07	-4.5	2.25	1.92
ACE2(6M0J)_14565583_uff_E=446.70	-5	2.251	1.957
ACE2(6M0J)_10596108_uff_E=425.76	-4.5	2.251	1.814
ACE2(6M0J)_132286397_uff_E=602.85	-3.7	2.253	1.613
ACE2(6M0J)_73331208_uff_E=661.17	-6.3	2.256	1.779
ACE2(6M0J)_76973167_uff_E=599.22	-5.6	2.256	1.8
ACE2(6M0J)_10761572_uff_E=428.30	-4.5	2.256	1.856
ACE2(6M0J)_138496616_uff_E=483.72	-4.2	2.257	1.877
ACE2(6M0J)_629676_uff_E=362.11	-5.2	2.258	2.023
ACE2(6M0J)_298140_uff_E=400.18	-5.6	2.26	1.844
ACE2(6M0J)_71764911_uff_E=490.07	-5.7	2.264	1.716
ACE2(6M0J)_25171429_uff_E=423.15	-4.4	2.266	1.67
ACE2(6M0J)_118254213_uff_E=644.51	-4.9	2.288	1.604
ACE2(6M0J)_121304016	-5.9	2.289	1.572
ACE2(6M0J)_123846923_uff_E=605.00	-5.8	2.29	1.82
ACE2(6M0J)_57395698_uff_E=490.56	-5.7	2.296	1.807
ACE2(6M0J)_68727568_uff_E=497.72	-4.8	2.298	1.961
ACE2(6M0J)_14067764_uff_E=703.84	-6	2.299	1.755
ACE2(6M0J)_127053185_uff_E=417.22	-5.6	2.3	2.024
ACE2(6M0J)_73331772_uff_E=586.44	-4.3	2.3	2.013
ACE2(6M0J)_3512_uff_E=436.39	-4.7	2.301	1.956
ACE2(6M0J)_132286457_uff_E=528.62	-3.3	2.303	1.494
ACE2(6M0J)_10810786_uff_E=493.34	-4.4	2.306	1.908
ACE2(6M0J)_118267042_uff_E=443.73	-5	2.309	1.81
ACE2(6M0J)_98159927_uff_E=447.95	-5	2.323	1.794
ACE2(6M0J)_125429497_uff_E=567.88	-3.5	2.325	1.618
ACE2(6M0J)_23424319_uff_E=490.69	-5.8	2.328	1.893
ACE2(6M0J)_23424321_uff_E=494.61	-5.7	2.338	1.872
ACE2(6M0J)_941385_uff_E=474.79	-4.8	2.344	1.86
ACE2(6M0J)_125429985_uff_E=511.44	-6	2.348	1.296
ACE2(6M0J)_129895373_uff_E=537.90	-3.6	2.355	1.37
ACE2(6M0J)_44148513_uff_E=442.54	-4.9	2.358	2.109
ACE2(6M0J)_127253416_uff_E=553.99	-5.6	2.362	1.742
ACE2(6M0J)_118254190_uff_E=511.99	-4.9	2.364	1.673
ACE2(6M0J)_123214764_uff_E=687.85	-3.2	2.364	1.199
ACE2(6M0J)_3082005_uff_E=446.17	-4.6	2.366	1.806
ACE2(6M0J)_98159926_uff_E=475.82	-4.6	2.367	1.908
ACE2(6M0J)_132286340_uff_E=569.38	-3.9	2.376	1.717
ACE2(6M0J)_98125637_uff_E=650.71	-3.9	2.376	1.788
ACE2(6M0J)_25171635_uff_E=456.32	-5	2.379	1.992
ACE2(6M0J)_125428417_uff_E=471.95	-4.4	2.382	1.322
ACE2(6M0J)_44139588_uff_E=509.86	-5.2	2.383	1.864
ACE2(6M0J)_129895030_uff_E=475.88	-5.2	2.39	1.263
ACE2(6M0J)_23424082_uff_E=486.48	-5.7	2.394	1.915
ACE2(6M0J)_592609_uff_E=494.95	-5	2.394	1.895
ACE2(6M0J)_118254121_uff_E=637.58	-5.8	2.395	1.644
ACE2(6M0J)_118254145_uff_E=558.28	-5.4	2.396	1.969
ACE2(6M0J)_574586_uff_E=496.46	-5.3	2.396	1.879
ACE2(6M0J)_129895030_uff_E=475.88	-4.9	2.396	1.755
ACE2(6M0J)_56924746_uff_E=397.29	-4.4	2.397	1.886
ACE2(6M0J)_121304016	-5.2	2.4	1.713
ACE2(6M0J)_144564119_uff_E=511.99	-5.1	2.41	1.686
ACE2(6M0J)_253250_uff_E=428.28	-4.5	2.413	1.94
ACE2(6M0J)_98058925_uff_E=284.04	-5.2	2.415	1.957
ACE2(6M0J)_44139587_uff_E=1748.94	-5.8	2.417	1.823
ACE2(6M0J)_118254190_uff_E=511.99	-4.9	2.418	1.924
ACE2(6M0J)_46843965_uff_E=501.88	-5	2.419	1.956
ACE2(6M0J)_144564119_uff_E=511.99	-5.2	2.423	1.911
ACE2(6M0J)_46843899_uff_E=466.21	-5.8	2.428	1.782
ACE2(6M0J)_119091269_uff_E=287.41	-4.6	2.435	1.749
ACE2(6M0J)_25171430_uff_E=1688.83	-5	2.44	2.139
ACE2(6M0J)_139588134_uff_E=457.99	-4.8	2.44	1.89
ACE2(6M0J)_144564061_uff_E=397.26	-5.3	2.448	1.964
ACE2(6M0J)_154388188_uff_E=342.57	-4.6	2.451	1.946
ACE2(6M0J)_125428416_uff_E=475.88	-3.7	2.451	1.783
ACE2(6M0J)_46844083_uff_E=525.07	-5.4	2.456	1.942
ACE2(6M0J)_92222232_uff_E=435.92	-4.5	2.463	1.947
ACE2(6M0J)_73331487_uff_E=640.93	-6.1	2.466	1.707
ACE2(6M0J)_129895443_uff_E=507.32	-5.9	2.466	1.318
ACE2(6M0J)_75218801_uff_E=494.49	-4.2	2.467	2.009
ACE2(6M0J)_142550537_uff_E=823.03	-3.6	2.471	2.159
ACE2(6M0J)_98058925_uff_E=284.04	-5.3	2.477	2.062
ACE2(6M0J)_10668598_uff_E=474.70	-5.5	2.484	2.053
ACE2(6M0J)_73331345_uff_E=668.75	-5.7	2.485	1.759
ACE2(6M0J)_118254151_uff_E=635.34	-6	2.486	2.036
ACE2(6M0J)_98058924_uff_E=293.41	-5.4	2.489	2.023
ACE2(6M0J)_25171846_uff_E=442.12	-5.1	2.491	2.032
ACE2(6M0J)_142550519_uff_E=411.61	-5.2	2.497	1.992
ACE2(6M0J)_118267073_uff_E=557.12	-4.2	2.504	2.072
ACE2(6M0J)_121304016	-4.7	2.512	1.681
ACE2(6M0J)_73331488_uff_E=637.67	-3.8	2.513	1.773
ACE2(6M0J)_23424319_uff_E=490.69	-5.5	2.516	1.998
ACE2(6M0J)_56950844_uff_E=501.37	-5.2	2.517	1.786
ACE2(6M0J)_23424433_uff_E=500.83	-5.4	2.518	1.471
ACE2(6M0J)_44565973_uff_E=439.63	-4.7	2.531	1.896
ACE2(6M0J)_611918_uff_E=475.46	-4.7	2.531	2.02
ACE2(6M0J)_46844079_uff_E=544.43	-4.4	2.531	1.813
ACE2(6M0J)_10497262_uff_E=397.63	-5.5	2.545	2.083
ACE2(6M0J)_118263250_uff_E=523.14	-4.1	2.552	2.043
ACE2(6M0J)_132286090_uff_E=475.88	-5.4	2.557	1.339
ACE2(6M0J)_44148513_uff_E=442.54	-4.7	2.565	2.031
ACE2(6M0J)_14565587_uff_E=489.93	-4.7	2.566	1.992
ACE2(6M0J)_137652147_uff_E=534.82	-5.6	2.573	1.646
ACE2(6M0J)_586858_uff_E=517.53	-5.5	2.575	2.11
ACE2(6M0J)_10097_uff_E=554.35	-4.7	2.577	2.454
ACE2(6M0J)_46844024_uff_E=467.06	-6	2.578	1.916
ACE2(6M0J)_73331209_uff_E=661.60	-6.4	2.59	2.081
ACE2(6M0J)_123836216_uff_E=631.96	-4.5	2.595	1.798
ACE2(6M0J)_138514463_uff_E=391.15	-5.4	2.597	2.261
ACE2(6M0J)_25171632_uff_E=683.46	-5.2	2.608	1.956
ACE2(6M0J)_44566078_uff_E=549.87	-4.2	2.61	2.121
ACE2(6M0J)_71764910_uff_E=531.32	-4.6	2.613	2.035
ACE2(6M0J)_44566077_uff_E=490.23	-4.7	2.616	2.218
ACE2(6M0J)_137467368_uff_E=441.10	-4.6	2.616	2.02
ACE2(6M0J)_71043635_uff_E=1668.80	-4.7	2.618	1.927
ACE2(6M0J)_57393956_uff_E=482.31	-4.5	2.619	2.004
ACE2(6M0J)_71312580_uff_E=422.79	-5	2.62	2.082
ACE2(6M0J)_129895451_uff_E=502.94	-4.5	2.62	1.985
ACE2(6M0J)_92222233_uff_E=448.40	-4.9	2.622	2.256
ACE2(6M0J)_118263245_uff_E=614.68	-4.8	2.625	2.297
ACE2(6M0J)_56950846_uff_E=485.31	-5.8	2.633	1.688
ACE2(6M0J)_14565589_uff_E=493.87	-4.9	2.633	2.227
ACE2(6M0J)_137467368_uff_E=441.10	-4.7	2.633	2.217
ACE2(6M0J)_123361815_uff_E=380.82	-4.8	2.634	2.045
ACE2(6M0J)_44139589_uff_E=599.15	-5.4	2.639	2.053
ACE2(6M0J)_11603327_uff_E=498.67	-4.4	2.641	2.149
ACE2(6M0J)_123361815_uff_E=380.82	-5.7	2.642	2.09
ACE2(6M0J)_118263248_uff_E=603.75	-2.7	2.642	1.932
ACE2(6M0J)_118254083_uff_E=620.90	-4.8	2.644	1.828
ACE2(6M0J)_25171637_uff_E=456.94	-5.2	2.646	2.166
ACE2(6M0J)_574586_uff_E=496.46	-5	2.647	2.06
ACE2(6M0J)_44139588_uff_E=509.86	-5.1	2.648	1.778
ACE2(6M0J)_57395698_uff_E=490.56	-5.1	2.652	2.079
ACE2(6M0J)_46844082_uff_E=682.67	-5.2	2.654	1.909
ACE2(6M0J)_25171635_uff_E=456.32	-3.9	2.655	2.361
ACE2(6M0J)_25171427_uff_E=451.54	-4.4	2.656	1.829
ACE2(6M0J)_118254182_uff_E=641.96	-3.4	2.672	1.878
ACE2(6M0J)_91035900_uff_E=505.87	-5	2.674	1.51
ACE2(6M0J)_131975182_uff_E=561.17	-4.8	2.677	1.981
ACE2(6M0J)_125429986_uff_E=507.32	-5.8	2.679	1.255
ACE2(6M0J)_71317161_uff_E=422.79	-5	2.69	2.13
ACE2(6M0J)_289550_uff_E=239.38	-4.3	2.692	1.98
ACE2(6M0J)_98058926_uff_E=284.11	-5.7	2.696	2.119
ACE2(6M0J)_46844023_uff_E=474.74	-5.5	2.698	1.937
ACE2(6M0J)_10712095_uff_E=399.63	-4.8	2.713	2.054
ACE2(6M0J)_14067764_uff_E=703.84	-5.5	2.725	1.72
ACE2(6M0J)_72726987_uff_E=607.92	-5.9	2.731	1.558
ACE2(6M0J)_132286528_uff_E=486.36	-4.7	2.743	1.985
ACE2(6M0J)_25171637_uff_E=456.94	-4.6	2.744	1.988
ACE2(6M0J)_73331628_uff_E=624.00	-3.7	2.745	1.895
ACE2(6M0J)_23424320_uff_E=445.80	-4	2.75	2.135
ACE2(6M0J)_91035900_uff_E=505.87	-4.3	2.753	1.583
ACE2(6M0J)_46844137_uff_E=493.79	-4	2.757	1.954
ACE2(6M0J)_56924746_uff_E=397.29	-4.3	2.77	2.577
ACE2(6M0J)_101592382_uff_E=439.16	-5.6	2.773	2.044
ACE2(6M0J)_46843961_uff_E=566.24	-5.4	2.785	1.99
ACE2(6M0J)_142550524_uff_E=360.94	-4.8	2.817	2.175
ACE2(6M0J)_10574693_uff_E=486.37	-5.1	2.82	1.912
ACE2(6M0J)_127253416_uff_E=553.99	-2.9	2.826	1.829
ACE2(6M0J)_13735050_uff_E=749.67	-5	2.828	1.852
ACE2(6M0J)_620371_uff_E=498.25	-5.2	2.829	2.085
ACE2(6M0J)_10810923_uff_E=477.96	-6.1	2.83	2.033
ACE2(6M0J)_10691458_uff_E=474.28	-5.7	2.83	2.021
ACE2(6M0J)_10643661_uff_E=493.88	-5.8	2.832	2.032
ACE2(6M0J)_147116578_uff_E=520.21	-5.8	2.832	2.013
ACE2(6M0J)_70870984_uff_E=487.13	-5.7	2.843	1.976
ACE2(6M0J)_118263248_uff_E=603.75	-4.4	2.845	2.068
ACE2(6M0J)_10668598_uff_E=474.70	-2.7	2.852	2.201
ACE2(6M0J)_10406626_uff_E=512.41	-4.4	2.865	2.035
ACE2(6M0J)_10787864_uff_E=481.64	-5.9	2.881	2.009
ACE2(6M0J)_98058925_uff_E=284.04	-5.3	2.891	2.155
ACE2(6M0J)_127253416_uff_E=553.99	-4.4	2.898	2.019
ACE2(6M0J)_91035900_uff_E=505.87	-4.1	2.929	1.964
ACE2(6M0J)_118263264_uff_E=1066.87	-5.3	2.932	2.182
ACE2(6M0J)_71764910_uff_E=531.32	-3.1	2.934	2.719
ACE2(6M0J)_57395698_uff_E=490.56	-5.5	2.94	2.36
ACE2(6M0J)_73331491_uff_E=631.59	-4	2.945	2.169
ACE2(6M0J)_118263228_uff_E=472.25	-4.9	2.952	2.105
ACE2(6M0J)_125428417_uff_E=471.95	-2.7	2.952	1.662
ACE2(6M0J)_131964498_uff_E=431.93	-5	2.953	2.46
ACE2(6M0J)_89798228_uff_E=373.07	-5.3	2.954	2.355
ACE2(6M0J)_10690292_uff_E=457.16	-5.5	2.966	2.132
ACE2(6M0J)_118254099_uff_E=523.14	-4.6	2.985	2.271
ACE2(6M0J)_73331348_uff_E=633.58	-5.7	2.99	2.031
ACE2(6M0J)_73330911_uff_E=636.92	-4	2.993	1.961
ACE2(6M0J)_134126307_uff_E=430.18	-3.7	2.998	2.004
ACE2(6M0J)_44139590_uff_E=680.31	-6	3.002	2.284
ACE2(6M0J)_73331345_uff_E=668.75	-5.5	3.011	2.207
ACE2(6M0J)_132286528_uff_E=486.36	-4.7	3.011	1.841
ACE2(6M0J)_118263245_uff_E=614.68	-5.4	3.012	2.314
ACE2(6M0J)_21629991_uff_E=425.22	-4.5	3.018	2.084
ACE2(6M0J)_139588134_uff_E=457.99	-5.1	3.022	2.212
ACE2(6M0J)_46843963_uff_E=502.61	-5.1	3.038	2.109
ACE2(6M0J)_46843964_uff_E=523.87	-4.2	3.039	2.218
ACE2(6M0J)_626596_uff_E=481.66	-5.2	3.041	2.041
ACE2(6M0J)_71318422_uff_E=595.64	-5.5	3.052	2.08
ACE2(6M0J)_74426566_uff_E=467.72	-2.7	3.071	2.322
ACE2(6M0J)_118254232_uff_E=631.91	-5.7	3.082	2.27
ACE2(6M0J)_4125561_uff_E=421.60	-4.3	3.083	2.45
ACE2(6M0J)_123350254_uff_E=1809.62	-5.6	3.09	2.315
ACE2(6M0J)_118267052_uff_E=464.23	-4.7	3.093	2.509
ACE2(6M0J)_138514335_uff_E=406.05	-5.2	3.098	2.443
ACE2(6M0J)_129010273_uff_E=436.64	-5.1	3.1	2.346
ACE2(6M0J)_73331060_uff_E=634.29	-6	3.102	2.138
ACE2(6M0J)_123214764_uff_E=687.85	-3.6	3.102	2.16
ACE2(6M0J)_71763717_uff_E=465.30	-5.2	3.108	2.102
ACE2(6M0J)_44566075_uff_E=523.32	-5.6	3.126	2.185
ACE2(6M0J)_125428750_uff_E=537.29	-4.1	3.132	2.079
ACE2(6M0J)_56950846_uff_E=485.31	-5.4	3.145	2.306
ACE2(6M0J)_10045461_uff_E=524.59	-4.2	3.165	2.311
ACE2(6M0J)_118254103_uff_E=631.96	-5.6	3.167	2.183
ACE2(6M0J)_89054741_uff_E=556.64	-4.4	3.168	1.783
ACE2(6M0J)_75218864_uff_E=499.12	-3.7	3.17	2.382
ACE2(6M0J)_75218864_uff_E=499.12	-5.1	3.172	2.356
ACE2(6M0J)_622712_uff_E=363.04	-5.8	3.174	2.421
ACE2(6M0J)_10643661_uff_E=493.88	-4.1	3.18	2.49
ACE2(6M0J)_10619960_uff_E=518.46	-5.6	3.183	2.309
ACE2(6M0J)_137467524_uff_E=386.34	-5.3	3.185	2.045
ACE2(6M0J)_73053256_uff_E=792.96	-4.7	3.187	2.28
ACE2(6M0J)_123846923_uff_E=605.00	-3.3	3.189	2.673
ACE2(6M0J)_118254182_uff_E=641.96	-3.6	3.196	2.212
ACE2(6M0J)_44139588_uff_E=509.86	-5.1	3.198	2.186
ACE2(6M0J)_118254246_uff_E=635.83	-5.5	3.205	2.245
ACE2(6M0J)_56950845_uff_E=553.08	-5.6	3.209	2.024
ACE2(6M0J)_137647518_uff_E=469.45	-5.2	3.219	2.624
ACE2(6M0J)_3512_uff_E=436.39	-5.1	3.233	2.445
ACE2(6M0J)_90958864_uff_E=541.66	-3.8	3.236	2.012
ACE2(6M0J)_92222230_uff_E=438.23	-4.4	3.241	2.635
ACE2(6M0J)_76973167_uff_E=599.22	-5.7	3.254	2.4
ACE2(6M0J)_137467381_uff_E=489.66	-6.2	3.256	2.115
ACE2(6M0J)_132286090_uff_E=475.88	-4.5	3.261	1.799
ACE2(6M0J)_612127_uff_E=488.19	-5.3	3.264	2.425
ACE2(6M0J)_73331346_uff_E=611.27	-4.3	3.27	2.329
ACE2(6M0J)_44139587_uff_E=1748.94	-4.9	3.279	1.788
ACE2(6M0J)_127053184_uff_E=568.68	-4.6	3.292	2.349
ACE2(6M0J)_611918_uff_E=475.46	-5.4	3.295	2.447
ACE2(6M0J)_73331344_uff_E=637.78	-6.2	3.297	2.695
ACE2(6M0J)_57395698_uff_E=490.56	-4.7	3.297	1.824
ACE2(6M0J)_14565583_uff_E=446.70	-5.1	3.307	2.482
ACE2(6M0J)_23424321_uff_E=494.61	-4.9	3.309	2.517
ACE2(6M0J)_95988133_uff_E=478.45	-5.2	3.317	2.689
ACE2(6M0J)_75218825_uff_E=478.84	-3.7	3.317	2.459
ACE2(6M0J)_101592379_uff_E=353.83	-5.4	3.319	2.063
ACE2(6M0J)_137658162_uff_E=447.07	-4.7	3.32	2.572
ACE2(6M0J)_22216755_uff_E=505.61	-4.7	3.323	2.542
ACE2(6M0J)_298140_uff_E=400.18	-5.6	3.328	2.532
ACE2(6M0J)_46843961_uff_E=566.24	-5.9	3.329	2.564
ACE2(6M0J)_144564119_uff_E=511.99	-4.7	3.333	2.116
ACE2(6M0J)_14565581_uff_E=465.26	-5.5	3.334	1.767
ACE2(6M0J)_44566051_uff_E=374.99	-4.9	3.336	2.744
ACE2(6M0J)_123872201_uff_E=1875.00	-5.5	3.338	2.463
ACE2(6M0J)_142550537_uff_E=823.03	-5.2	3.349	2.497
ACE2(6M0J)_73331346_uff_E=611.27	-3.7	3.353	2.604
ACE2(6M0J)_5126442_uff_E=412.73	-5.2	3.354	2.411
ACE2(6M0J)_10574693_uff_E=486.37	-5.8	3.355	2.343
ACE2(6M0J)_129894893_uff_E=493.62	-5.3	3.36	1.782
ACE2(6M0J)_14067764_uff_E=703.84	-5.4	3.366	1.902
ACE2(6M0J)_125429177_uff_E=507.62	-5.1	3.372	1.297
ACE2(6M0J)_125428749_uff_E=493.62	-5.9	3.375	1.867
ACE2(6M0J)_289550_uff_E=239.38	-4.2	3.375	2.197
ACE2(6M0J)_73330766_uff_E=651.99	-6	3.376	2.493
ACE2(6M0J)_20841686_uff_E=406.51	-5.1	3.376	1.806
ACE2(6M0J)_161302_uff_E=363.38	-4.9	3.377	2.698
ACE2(6M0J)_137467367_uff_E=372.94	-5.7	3.379	2.14
ACE2(6M0J)_98058927_uff_E=293.39	-5.7	3.379	1.918
ACE2(6M0J)_118263242_uff_E=1835.61	-5	3.379	2.705
ACE2(6M0J)_102239942_uff_E=477.31	-5.8	3.386	2
ACE2(6M0J)_9974417_uff_E=422.04	-4.8	3.387	2.154
ACE2(6M0J)_44566078_uff_E=549.87	-4.3	3.395	2.48
ACE2(6M0J)_620374_uff_E=372.95	-5	3.401	2.72
ACE2(6M0J)_125429427_uff_E=542.77	-3.4	3.406	2.065
ACE2(6M0J)_44139589_uff_E=599.15	-6.1	3.419	2.763
ACE2(6M0J)_101592379_uff_E=353.83	-5.7	3.421	2.325
ACE2(6M0J)_14737140_uff_E=464.56	-5.2	3.421	1.831
ACE2(6M0J)_71764910_uff_E=531.32	-5.5	3.43	2.532
ACE2(6M0J)_25171429_uff_E=423.15	-4.2	3.438	2.643
ACE2(6M0J)_44566031_uff_E=562.36	-5.8	3.445	2.576
ACE2(6M0J)_23424082_uff_E=486.48	-4.7	3.45	1.878
ACE2(6M0J)_139584816_uff_E=463.51	-5.3	3.454	2.398
ACE2(6M0J)_131964506_uff_E=573.49	-4.1	3.455	2.32
ACE2(6M0J)_46844083_uff_E=525.07	-6.1	3.458	2.152
ACE2(6M0J)_46844082_uff_E=682.67	-6.3	3.465	2.141
ACE2(6M0J)_23955821_uff_E=351.99	-6	3.469	1.985
ACE2(6M0J)_118263243_uff_E=326.16	-5.2	3.47	2.545
ACE2(6M0J)_125429498_uff_E=568.24	-3.8	3.47	1.913
ACE2(6M0J)_56950842_uff_E=522.07	-5.2	3.474	2.252
ACE2(6M0J)_620368_uff_E=417.12	-4.9	3.475	2.242
ACE2(6M0J)_118263243_uff_E=326.16	-5.9	3.479	2.424
ACE2(6M0J)_73331629_uff_E=624.62	-4.8	3.479	2.386
ACE2(6M0J)_98058927_uff_E=293.39	-5.9	3.486	2.104
ACE2(6M0J)_118263269_uff_E=1102.50	-4	3.487	2.532
ACE2(6M0J)_101288398_uff_E=438.73	-5.8	3.488	2.29
ACE2(6M0J)_118254227_uff_E=641.19	-5	3.488	2.319
ACE2(6M0J)_25171429_uff_E=423.15	-4	3.495	2.193
ACE2(6M0J)_124301775_uff_E=494.73	-4.5	3.501	2.697
ACE2(6M0J)_118263242_uff_E=1835.61	-5.2	3.503	1.804
ACE2(6M0J)_118263264_uff_E=1066.87	-5.4	3.505	2.021
ACE2(6M0J)_95988135_uff_E=481.81	-5.1	3.508	2.829
ACE2(6M0J)_9974417_uff_E=422.04	-4.9	3.519	2.439
ACE2(6M0J)_124301776_uff_E=496.28	-5.9	3.52	2.014
ACE2(6M0J)_14589751_uff_E=447.75	-4.7	3.523	1.87
ACE2(6M0J)_125429633_uff_E=507.88	-5.2	3.527	1.465
ACE2(6M0J)_137467524_uff_E=386.34	-5	3.531	2.32
ACE2(6M0J)_44139589_uff_E=599.15	-5.9	3.533	2.268
ACE2(6M0J)_23424082_uff_E=486.48	-4.8	3.533	2.335
ACE2(6M0J)_73331344_uff_E=637.78	-4.2	3.534	2.271
ACE2(6M0J)_10712095_uff_E=399.63	-5.6	3.537	2.378
ACE2(6M0J)_125429633_uff_E=507.88	-4.2	3.537	1.628
ACE2(6M0J)_10691458_uff_E=474.28	-4.5	3.54	2.28
ACE2(6M0J)_70870984_uff_E=487.13	-5.7	3.542	2.592
ACE2(6M0J)_125429840_uff_E=506.48	-3.7	3.544	2.395
ACE2(6M0J)_25171430_uff_E=1688.83	-5	3.549	2.512
ACE2(6M0J)_98058925_uff_E=284.04	-5.2	3.55	2.259
ACE2(6M0J)_23424318_uff_E=443.60	-3.4	3.551	2.701
ACE2(6M0J)_125429126_uff_E=510.78	-5.4	3.552	1.406
ACE2(6M0J)_14760418_uff_E=350.88	-5.3	3.552	2.077
ACE2(6M0J)_586858_uff_E=517.53	-5	3.553	2.527
ACE2(6M0J)_99908084_uff_E=713.20	-4.9	3.553	1.979
ACE2(6M0J)_76970921_uff_E=483.51	-5.4	3.554	2.009
ACE2(6M0J)_132286067_uff_E=605.32	-6.1	3.555	1.457
ACE2(6M0J)_98159926_uff_E=475.82	-4.7	3.558	2.19
ACE2(6M0J)_56950842_uff_E=522.07	-4.9	3.559	2.426
ACE2(6M0J)_14589753_uff_E=472.14	-4.8	3.56	2.132
ACE2(6M0J)_118267097_uff_E=473.76	-5.3	3.562	2.506
ACE2(6M0J)_612127_uff_E=488.19	-4.7	3.562	2.268
ACE2(6M0J)_620360_uff_E=444.66	-4.8	3.566	2.522
ACE2(6M0J)_118254232_uff_E=631.91	-5.5	3.568	2.549
ACE2(6M0J)_142550538_uff_E=347.64	-5.4	3.572	2.518
ACE2(6M0J)_44566076_uff_E=484.63	-4.9	3.573	2.753
ACE2(6M0J)_89054741_uff_E=556.64	-5.4	3.575	2.052
ACE2(6M0J)_99908084_uff_E=713.20	-4.8	3.576	2.157
ACE2(6M0J)_118254151_uff_E=635.34	-4.6	3.579	2.766
ACE2(6M0J)_612127_uff_E=488.19	-4.9	3.585	2.341
ACE2(6M0J)_10785158_uff_E=562.11	-4.7	3.585	2.726
ACE2(6M0J)_46843963_uff_E=502.61	-5.7	3.606	2.507
ACE2(6M0J)_124301775_uff_E=494.73	-4.8	3.606	2.129
ACE2(6M0J)_118263231_uff_E=574.80	-4.9	3.61	2.136
ACE2(6M0J)_56950844_uff_E=501.37	-5.8	3.612	2.395
ACE2(6M0J)_138514465_uff_E=385.97	-5.2	3.62	2.031
ACE2(6M0J)_25171633_uff_E=466.90	-5.3	3.625	2.362
ACE2(6M0J)_15086460_uff_E=467.63	-4.9	3.626	2.001
ACE2(6M0J)_23424413_uff_E=399.30	-4.7	3.636	2.032
ACE2(6M0J)_10406626_uff_E=512.41	-4.5	3.636	1.917
ACE2(6M0J)_70876805_uff_E=498.65	-5.8	3.637	2.611
ACE2(6M0J)_25171430_uff_E=1688.83	-4.9	3.64	2.822
ACE2(6M0J)_622712_uff_E=363.04	-4.9	3.64	2.062
ACE2(6M0J)_195521_uff_E=426.42	-5.3	3.643	1.849
ACE2(6M0J)_3512_uff_E=436.39	-4.6	3.647	2.063
ACE2(6M0J)_10712095_uff_E=399.63	-4.5	3.647	2.917
ACE2(6M0J)_70870984_uff_E=487.13	-5.4	3.648	2.687
ACE2(6M0J)_148240297_uff_E=338.09	-5.5	3.649	1.385
ACE2(6M0J)_129895618_uff_E=499.93	-4	3.653	2.419
ACE2(6M0J)_10619960_uff_E=518.46	-4.5	3.654	2.269
ACE2(6M0J)_10019062_uff_E=415.66	-5	3.656	2.327
ACE2(6M0J)_6452395_uff_E=485.14	-5.1	3.658	2.37
ACE2(6M0J)_131964505_uff_E=399.09	-5.1	3.659	2.562
ACE2(6M0J)_612127_uff_E=488.19	-4.6	3.662	1.993
ACE2(6M0J)_620360_uff_E=444.66	-4.9	3.668	2.029
ACE2(6M0J)_46843961_uff_E=566.24	-5.9	3.677	2.36
ACE2(6M0J)_98058924_uff_E=293.41	-5.4	3.681	2.285
ACE2(6M0J)_56950842_uff_E=522.07	-4.6	3.682	2.728
ACE2(6M0J)_10097_uff_E=554.35	-4.7	3.683	2.442
ACE2(6M0J)_44566076_uff_E=484.63	-5	3.689	2.244
ACE2(6M0J)_620242_uff_E=487.43	-4.9	3.691	2.06
ACE2(6M0J)_118263248_uff_E=603.75	-2.8	3.693	2.552
ACE2(6M0J)_10097_uff_E=554.35	-4.5	3.695	2.451
ACE2(6M0J)_133688441_uff_E=267.44	-5.2	3.702	1.934
ACE2(6M0J)_11794329_uff_E=432.53	-4.5	3.703	2.675
ACE2(6M0J)_138514463_uff_E=391.15	-5	3.708	2.331
ACE2(6M0J)_125429177_uff_E=507.62	-4.1	3.709	2.498
ACE2(6M0J)_118254214_uff_E=630.93	-4.8	3.71	2.319
ACE2(6M0J)_125429127_uff_E=505.08	-4.8	3.711	1.889
ACE2(6M0J)_941385_uff_E=474.79	-5.1	3.713	1.96
ACE2(6M0J)_125429986_uff_E=507.32	-4.5	3.713	1.947
ACE2(6M0J)_44566064_uff_E=432.11	-4.9	3.714	1.883
ACE2(6M0J)_176431_uff_E=457.70	-4.6	3.721	2.325
ACE2(6M0J)_153852917_uff_E=321.39	-4.8	3.724	2.302
ACE2(6M0J)_137658162_uff_E=447.07	-4.8	3.726	1.875
ACE2(6M0J)_147554572_uff_E=341.50	-4.6	3.726	2.789
ACE2(6M0J)_129895176_uff_E=504.54	-5.9	3.735	1.631
ACE2(6M0J)_125429427_uff_E=542.77	-3.6	3.741	2.389
ACE2(6M0J)_10761572_uff_E=428.30	-4.9	3.745	2.863
ACE2(6M0J)_56924747_uff_E=515.53	-6	3.75	2.011
ACE2(6M0J)_125428750_uff_E=537.29	-5.7	3.754	2.065
ACE2(6M0J)_14565585_uff_E=471.35	-5	3.756	1.876
ACE2(6M0J)_98058924_uff_E=293.41	-5.3	3.765	2.245
ACE2(6M0J)_10407853_uff_E=504.30	-5.9	3.766	1.762
ACE2(6M0J)_132286322_uff_E=531.16	-4.6	3.767	2.089
ACE2(6M0J)_125429127_uff_E=505.08	-5.8	3.768	1.899
ACE2(6M0J)_118263269_uff_E=1102.50	-5.1	3.769	1.921
ACE2(6M0J)_44566031_uff_E=562.36	-5.2	3.772	2.842
ACE2(6M0J)_71764910_uff_E=531.32	-4.4	3.775	2.249
ACE2(6M0J)_131770040_uff_E=354.57	-5.3	3.778	2.446
ACE2(6M0J)_3082005_uff_E=446.17	-4.8	3.782	1.963
ACE2(6M0J)_10406626_uff_E=512.41	-5.9	3.785	1.998
ACE2(6M0J)_25171428_uff_E=435.54	-5	3.785	2.878
ACE2(6M0J)_25171849_uff_E=574.34	-6	3.786	2.613
ACE2(6M0J)_611914_uff_E=389.12	-5.5	3.787	2.162
ACE2(6M0J)_102066899_uff_E=443.95	-4.6	3.787	2.626
ACE2(6M0J)_147554572_uff_E=341.50	-4.3	3.789	2.656
ACE2(6M0J)_14589759_uff_E=441.86	-4.8	3.79	1.828
ACE2(6M0J)_620374_uff_E=372.95	-5.2	3.792	2.216
ACE2(6M0J)_137467368_uff_E=441.10	-4.8	3.794	2.668
ACE2(6M0J)_56924747_uff_E=515.53	-6.1	3.8	2.029
ACE2(6M0J)_586839_uff_E=882.59	-5.6	3.804	2.833
ACE2(6M0J)_125429634_uff_E=502.94	-5.5	3.807	2.111
ACE2(6M0J)_129895451_uff_E=502.94	-5.8	3.809	1.831
ACE2(6M0J)_132286359_uff_E=505.08	-5.8	3.809	1.756
ACE2(6M0J)_14565585_uff_E=471.35	-4.8	3.812	2.508
ACE2(6M0J)_44566076_uff_E=484.63	-4.7	3.816	2.115
ACE2(6M0J)_92860931_uff_E=404.45	-4.5	3.818	2.593
ACE2(6M0J)_118254227_uff_E=641.19	-2.5	3.825	2.167
ACE2(6M0J)_118267049_uff_E=466.20	-5.1	3.829	1.978
ACE2(6M0J)_13735050_uff_E=749.67	-6	3.831	2.178
ACE2(6M0J)_73331208_uff_E=661.17	-6	3.84	2.636
ACE2(6M0J)_129895443_uff_E=507.32	-3.7	3.84	2.101
ACE2(6M0J)_129895443_uff_E=507.32	-4.2	3.841	2.037
ACE2(6M0J)_102066898_uff_E=415.66	-4.3	3.844	2.721
ACE2(6M0J)_92222231_uff_E=448.41	-5.1	3.846	1.936
ACE2(6M0J)_119091269_uff_E=287.41	-4.7	3.848	2.054
ACE2(6M0J)_118263269_uff_E=1102.50	-5.2	3.857	1.927
ACE2(6M0J)_125429178_uff_E=504.54	-5.2	3.859	1.727
ACE2(6M0J)_44566051_uff_E=374.99	-4.8	3.86	2.477
ACE2(6M0J)_76964619_uff_E=417.09	-4.9	3.863	2.206
ACE2(6M0J)_118207010_uff_E=1815.50	-5.6	3.864	2.159
ACE2(6M0J)_566721_uff_E=474.85	-5	3.864	2.045
ACE2(6M0J)_14589759_uff_E=441.86	-4.5	3.864	1.738
ACE2(6M0J)_10643661_uff_E=493.88	-4.5	3.865	2.386
ACE2(6M0J)_118267046_uff_E=447.92	-5.1	3.866	1.949
ACE2(6M0J)_98058927_uff_E=293.39	-5.6	3.867	2.346
ACE2(6M0J)_46843965_uff_E=501.88	-5.5	3.869	2.243
ACE2(6M0J)_76973812_uff_E=262.34	-5.1	3.87	2.346
ACE2(6M0J)_10406626_uff_E=512.41	-4.9	3.872	2.511
ACE2(6M0J)_118263237_uff_E=588.21	-4.3	3.873	2.827
ACE2(6M0J)_132286397_uff_E=602.85	-6.3	3.874	1.897
ACE2(6M0J)_102239942_uff_E=477.31	-6.4	3.875	2.174
ACE2(6M0J)_138514463_uff_E=391.15	-5.7	3.879	3.081
ACE2(6M0J)_129895222_uff_E=505.08	-4.5	3.885	2.04
ACE2(6M0J)_70658189_uff_E=385.06	-5.1	3.89	2.739
ACE2(6M0J)_144564153_uff_E=641.96	-5.3	3.895	2.217
ACE2(6M0J)_154593892_uff_E=383.60	-5	3.895	3.099
ACE2(6M0J)_70658189_uff_E=385.06	-5	3.901	2.27
ACE2(6M0J)_142550524_uff_E=360.94	-4.7	3.905	2.607
ACE2(6M0J)_125427757_uff_E=524.66	-4.2	3.907	1.446
ACE2(6M0J)_71737790_uff_E=419.80	-4.8	3.91	2.397
ACE2(6M0J)_73331487_uff_E=640.93	-5.6	3.911	2.992
ACE2(6M0J)_10810786_uff_E=493.34	-4.6	3.911	2.435
ACE2(6M0J)_10097_uff_E=554.35	-5	3.914	2.19
ACE2(6M0J)_10687333_uff_E=410.19	-5.8	3.915	2.494
ACE2(6M0J)_56691266_uff_E=482.23	-4.8	3.924	3.32
ACE2(6M0J)_620368_uff_E=417.12	-4.7	3.924	2.1
ACE2(6M0J)_98125637_uff_E=650.71	-3.3	3.925	2.722
ACE2(6M0J)_14589761_uff_E=525.45	-4.7	3.927	2.056
ACE2(6M0J)_71318420_uff_E=519.02	-4.8	3.928	2.996
ACE2(6M0J)_626596_uff_E=481.66	-5.6	3.929	2.002
ACE2(6M0J)_118263243_uff_E=326.16	-5	3.929	2.125
ACE2(6M0J)_44566068_uff_E=401.62	-5.5	3.933	1.968
ACE2(6M0J)_10810786_uff_E=493.34	-4.8	3.933	2.551
ACE2(6M0J)_89054741_uff_E=556.64	-5.4	3.936	2.316
ACE2(6M0J)_129895481_uff_E=567.88	-4.5	3.943	2.051
ACE2(6M0J)_129603774_uff_E=553.99	-5.7	3.944	2.064
ACE2(6M0J)_129894712_uff_E=519.13	-6	3.945	1.338
ACE2(6M0J)_44148513_uff_E=442.54	-4.9	3.947	2.216
ACE2(6M0J)_147554572_uff_E=341.50	-4.8	3.949	2.057
ACE2(6M0J)_23424321_uff_E=494.61	-4.6	3.949	2.341
ACE2(6M0J)_98058927_uff_E=293.39	-5.6	3.95	2.27
ACE2(6M0J)_138514336_uff_E=331.78	-5.2	3.951	3.004
ACE2(6M0J)_76970921_uff_E=483.51	-5.1	3.951	2.31
ACE2(6M0J)_125429841_uff_E=499.93	-4.5	3.952	2.477
ACE2(6M0J)_95988133_uff_E=478.45	-5	3.955	2.041
ACE2(6M0J)_154178022_uff_E=368.39	-4.9	3.956	2.123
ACE2(6M0J)_71043635_uff_E=1668.80	-4.4	3.956	2.316
ACE2(6M0J)_10497262_uff_E=397.63	-4.7	3.959	2.262
ACE2(6M0J)_118263268_uff_E=1104.59	-4.7	3.961	2.037
ACE2(6M0J)_161302_uff_E=363.38	-5.3	3.964	2.23
ACE2(6M0J)_10596108_uff_E=425.76	-4.6	3.964	2.468
ACE2(6M0J)_101592382_uff_E=439.16	-5.5	3.965	2.033
ACE2(6M0J)_10715802_uff_E=497.31	-5.8	3.967	2.111
ACE2(6M0J)_142550538_uff_E=347.64	-4.9	3.971	2.801
ACE2(6M0J)_118263228_uff_E=472.25	-5.4	3.972	1.982
ACE2(6M0J)_139584816_uff_E=463.51	-4.6	3.972	2.502
ACE2(6M0J)_132285949_uff_E=530.49	-6.1	3.976	1.861
ACE2(6M0J)_10019062_uff_E=415.66	-4.9	3.979	2.058
ACE2(6M0J)_123396595_uff_E=400.61	-4.9	3.981	2.615
ACE2(6M0J)_95988136_uff_E=478.36	-5.3	3.984	2.036
ACE2(6M0J)_118267073_uff_E=557.12	-5	3.984	2.01
ACE2(6M0J)_142550538_uff_E=347.64	-4.9	3.986	2.861
ACE2(6M0J)_57395698_uff_E=490.56	-4.4	3.987	2.711
ACE2(6M0J)_56924747_uff_E=515.53	-5.8	3.993	2.53
ACE2(6M0J)_10642700_uff_E=509.25	-6	3.999	2.576
ACE2(6M0J)_144564145_uff_E=652.83	-5.2	4.001	2.577
ACE2(6M0J)_73331060_uff_E=634.29	-6	4.002	2.734
ACE2(6M0J)_118263242_uff_E=1835.61	-4.7	4.01	2.358
ACE2(6M0J)_161302_uff_E=363.38	-5.2	4.014	2.032
ACE2(6M0J)_123361815_uff_E=380.82	-4.9	4.016	2.227
ACE2(6M0J)_630845_uff_E=373.54	-5.2	4.02	2.197
ACE2(6M0J)_10596108_uff_E=425.76	-4.2	4.022	2.229
ACE2(6M0J)_132286340_uff_E=569.38	-5.3	4.023	1.697
ACE2(6M0J)_10691458_uff_E=474.28	-4.5	4.031	2.928
ACE2(6M0J)_101288398_uff_E=438.73	-4.7	4.033	2.378
ACE2(6M0J)_11603327_uff_E=498.67	-4.7	4.035	1.998
ACE2(6M0J)_132286340_uff_E=569.38	-5	4.04	2.089
ACE2(6M0J)_25171637_uff_E=456.94	-5.9	4.047	2.847
ACE2(6M0J)_98058924_uff_E=293.41	-5	4.047	2.815
ACE2(6M0J)_10643661_uff_E=493.88	-4.7	4.047	2.255
ACE2(6M0J)_622712_uff_E=363.04	-5	4.048	2.237
ACE2(6M0J)_125429178_uff_E=504.54	-5.6	4.05	1.894
ACE2(6M0J)_131770040_uff_E=354.57	-5.1	4.05	2.384
ACE2(6M0J)_71737790_uff_E=419.80	-4.4	4.05	3.15
ACE2(6M0J)_3512_uff_E=436.39	-4.8	4.053	2.81
ACE2(6M0J)_10837041_uff_E=552.85	-3.8	4.055	2.652
ACE2(6M0J)_118263243_uff_E=326.16	-4.7	4.056	3.233
ACE2(6M0J)_11794329_uff_E=432.53	-3.7	4.059	2.159
ACE2(6M0J)_154178022_uff_E=368.39	-4.5	4.06	2.091
ACE2(6M0J)_46844023_uff_E=474.74	-5.8	4.061	2.908
ACE2(6M0J)_124301776_uff_E=496.28	-5.1	4.064	2.715
ACE2(6M0J)_129010273_uff_E=436.64	-4.8	4.065	2.833
ACE2(6M0J)_99908084_uff_E=713.20	-4.2	4.068	2.211
ACE2(6M0J)_132285940_uff_E=519.13	-6.1	4.07	1.406
ACE2(6M0J)_99908084_uff_E=713.20	-4.6	4.07	2.382
ACE2(6M0J)_289550_uff_E=239.38	-4.3	4.071	2.445
ACE2(6M0J)_139584816_uff_E=463.51	-4.5	4.073	2.027
ACE2(6M0J)_132285940_uff_E=519.13	-4.4	4.073	1.973
ACE2(6M0J)_23424319_uff_E=490.69	-4.9	4.074	2.827
ACE2(6M0J)_46844022_uff_E=503.08	-5	4.08	2.862
ACE2(6M0J)_71763717_uff_E=465.30	-5.7	4.083	2.519
ACE2(6M0J)_125429841_uff_E=499.93	-6.1	4.084	2.628
ACE2(6M0J)_127053185_uff_E=417.22	-6.2	4.089	3.01
ACE2(6M0J)_144564061_uff_E=397.26	-5.3	4.091	2.868
ACE2(6M0J)_14565584_uff_E=434.46	-4.5	4.093	2.627
ACE2(6M0J)_10019062_uff_E=415.66	-5.1	4.096	2.41
ACE2(6M0J)_102066898_uff_E=415.66	-4.1	4.097	2.562
ACE2(6M0J)_44565973_uff_E=439.63	-4.8	4.098	2.346
ACE2(6M0J)_4125561_uff_E=421.60	-4.7	4.098	2.213
ACE2(6M0J)_119091269_uff_E=287.41	-4.4	4.101	2.476
ACE2(6M0J)_10643661_uff_E=493.88	-4.9	4.106	2.484
ACE2(6M0J)_118267042_uff_E=443.73	-5.4	4.111	2.004
ACE2(6M0J)_142550538_uff_E=347.64	-5.1	4.113	2.872
ACE2(6M0J)_132286457_uff_E=528.62	-5.8	4.117	2.367
ACE2(6M0J)_125429127_uff_E=505.08	-4.6	4.12	2.453
ACE2(6M0J)_611918_uff_E=475.46	-5.4	4.121	2.493
ACE2(6M0J)_10619960_uff_E=518.46	-5	4.121	2.266
ACE2(6M0J)_14565587_uff_E=489.93	-4.8	4.122	2.567
ACE2(6M0J)_10623284_uff_E=545.80	-4.6	4.122	2.419
ACE2(6M0J)_154178022_uff_E=368.39	-4.3	4.125	2.496
ACE2(6M0J)_10406626_uff_E=512.41	-4.9	4.126	2.085
ACE2(6M0J)_118267042_uff_E=443.73	-4.7	4.126	2.475
ACE2(6M0J)_23424413_uff_E=399.30	-4.7	4.126	2.7
ACE2(6M0J)_131770040_uff_E=354.57	-4.7	4.128	2.095
ACE2(6M0J)_46843963_uff_E=502.61	-5.7	4.133	3.059
ACE2(6M0J)_95988133_uff_E=478.45	-4.9	4.133	2.16
ACE2(6M0J)_118254142_uff_E=558.28	-4.6	4.133	2.428
ACE2(6M0J)_75218824_uff_E=483.43	-3.8	4.133	2.335
ACE2(6M0J)_620370_uff_E=467.26	-4.6	4.136	2.713
ACE2(6M0J)_10407853_uff_E=504.30	-4.9	4.137	1.932
ACE2(6M0J)_129895222_uff_E=505.08	-5.8	4.142	2.077
ACE2(6M0J)_139584816_uff_E=463.51	-4.9	4.145	2.139
ACE2(6M0J)_125429177_uff_E=507.62	-5.1	4.146	1.761
ACE2(6M0J)_10619960_uff_E=518.46	-5.8	4.148	2.436
ACE2(6M0J)_9974417_uff_E=422.04	-5.2	4.148	2.428
ACE2(6M0J)_118267096_uff_E=623.75	-5.4	4.149	2.142
ACE2(6M0J)_46844082_uff_E=682.67	-5.7	4.151	1.843
ACE2(6M0J)_25171633_uff_E=466.90	-5.8	4.152	2.945
ACE2(6M0J)_289550_uff_E=239.38	-4.6	4.153	1.722
ACE2(6M0J)_102066898_uff_E=415.66	-6.1	4.154	2.928
ACE2(6M0J)_10690292_uff_E=457.16	-5.3	4.159	2.713
ACE2(6M0J)_10619960_uff_E=518.46	-5.6	4.162	2.649
ACE2(6M0J)_137467397_uff_E=418.62	-4.3	4.168	2.809
ACE2(6M0J)_153989287_uff_E=412.33	-5.2	4.17	2.278
ACE2(6M0J)_134126307_uff_E=430.18	-4.9	4.172	2.565
ACE2(6M0J)_138514334_uff_E=388.58	-4.1	4.172	2.705
ACE2(6M0J)_75218864_uff_E=499.12	-4	4.173	2.208
ACE2(6M0J)_10690292_uff_E=457.16	-5.4	4.178	2.118
ACE2(6M0J)_75218864_uff_E=499.12	-4.1	4.178	2.105
ACE2(6M0J)_10497262_uff_E=397.63	-5.2	4.179	2.749
ACE2(6M0J)_14760418_uff_E=350.88	-4.8	4.179	2.534
ACE2(6M0J)_10810786_uff_E=493.34	-4.3	4.182	2.505
ACE2(6M0J)_44565973_uff_E=439.63	-4.6	4.184	2.065
ACE2(6M0J)_10785158_uff_E=562.11	-5.8	4.185	2.393
ACE2(6M0J)_289550_uff_E=239.38	-4.6	4.191	2.488
ACE2(6M0J)_144564067_uff_E=408.10	-5	4.192	2.232
ACE2(6M0J)_21677661_uff_E=485.34	-4.6	4.192	3.137
ACE2(6M0J)_10097_uff_E=554.35	-5.9	4.2	2.291
ACE2(6M0J)_14565583_uff_E=446.70	-4.9	4.2	3.077
ACE2(6M0J)_125429426_uff_E=525.50	-4.6	4.203	2.36
ACE2(6M0J)_10712095_uff_E=399.63	-5.9	4.204	3.061
ACE2(6M0J)_129895618_uff_E=499.93	-5.9	4.204	2.468
ACE2(6M0J)_118254083_uff_E=620.90	-3.9	4.213	2.718
ACE2(6M0J)_14565583_uff_E=446.70	-4.5	4.214	2.375
ACE2(6M0J)_118267096_uff_E=623.75	-3.4	4.219	2.206
ACE2(6M0J)_46844079_uff_E=544.43	-5.1	4.221	2.376
ACE2(6M0J)_99908084_uff_E=713.20	-4.4	4.221	2.578
ACE2(6M0J)_118263233_uff_E=562.91	-5.2	4.223	2.088
ACE2(6M0J)_129895176_uff_E=504.54	-6.1	4.224	1.814
ACE2(6M0J)_138514334_uff_E=388.58	-3.9	4.224	2.823
ACE2(6M0J)_25171427_uff_E=451.54	-5	4.226	3.074
ACE2(6M0J)_76964619_uff_E=417.09	-3.8	4.227	2.466
ACE2(6M0J)_154388188_uff_E=342.57	-4.8	4.228	2.064
ACE2(6M0J)_153989287_uff_E=412.33	-4.6	4.231	2.813
ACE2(6M0J)_14565589_uff_E=493.87	-4.5	4.232	2.225
ACE2(6M0J)_14589751_uff_E=447.75	-4.7	4.235	1.845
ACE2(6M0J)_118263264_uff_E=1066.87	-5.3	4.236	2.655
ACE2(6M0J)_125429841_uff_E=499.93	-5.8	4.238	2.559
ACE2(6M0J)_102066899_uff_E=443.95	-4.4	4.239	2.509
ACE2(6M0J)_10691458_uff_E=474.28	-5.9	4.24	2.312
ACE2(6M0J)_10619960_uff_E=518.46	-5.8	4.242	2.446
ACE2(6M0J)_23955821_uff_E=351.99	-5.3	4.242	2.569
ACE2(6M0J)_15086460_uff_E=467.63	-4.9	4.242	2.56
ACE2(6M0J)_138514334_uff_E=388.58	-5.2	4.244	2.995
ACE2(6M0J)_566721_uff_E=474.85	-4.7	4.245	2.626
ACE2(6M0J)_15086460_uff_E=467.63	-5	4.247	3.294
ACE2(6M0J)_44566051_uff_E=374.99	-4.7	4.25	2.434
ACE2(6M0J)_71317160_uff_E=364.50	-4.9	4.252	3.132
ACE2(6M0J)_5702061_uff_E=436.39	-5.1	4.259	2.942
ACE2(6M0J)_9974417_uff_E=422.04	-5.1	4.264	2.568
ACE2(6M0J)_10763672_uff_E=488.17	-5.5	4.267	2.66
ACE2(6M0J)_23424320_uff_E=445.80	-3.7	4.267	2.397
ACE2(6M0J)_129895205_uff_E=525.50	-4.7	4.272	2.247
ACE2(6M0J)_95988136_uff_E=478.36	-5.3	4.278	2.478
ACE2(6M0J)_92222231_uff_E=448.41	-5.2	4.279	2.212
ACE2(6M0J)_123704177_uff_E=624.00	-3	4.282	2.994
ACE2(6M0J)_978395_uff_E=436.39	-4.4	4.283	2.462
ACE2(6M0J)_10715802_uff_E=497.31	-4.2	4.289	2.786
ACE2(6M0J)_14565589_uff_E=493.87	-4.2	4.289	2.546
ACE2(6M0J)_118263264_uff_E=1066.87	-5.6	4.29	2.312
ACE2(6M0J)_118267096_uff_E=623.75	-5	4.291	2.35
ACE2(6M0J)_123825667_uff_E=368.14	-5.1	4.294	2.71
ACE2(6M0J)_75218801_uff_E=494.49	-5.2	4.298	2.095
ACE2(6M0J)_91820110_uff_E=337.73	-4.8	4.299	2.803
ACE2(6M0J)_617268_uff_E=361.47	-4.9	4.301	2.724
ACE2(6M0J)_153852917_uff_E=321.39	-4.6	4.301	2.595
ACE2(6M0J)_124301776_uff_E=496.28	-5	4.302	2.618
ACE2(6M0J)_101288398_uff_E=438.73	-4.8	4.307	2.903
ACE2(6M0J)_620242_uff_E=487.43	-4.8	4.307	2.576
ACE2(6M0J)_14589759_uff_E=441.86	-4.7	4.308	1.63
ACE2(6M0J)_101592382_uff_E=439.16	-5.7	4.309	2.691
ACE2(6M0J)_56924745_uff_E=399.54	-4.8	4.316	2.814
ACE2(6M0J)_14589751_uff_E=447.75	-4.8	4.317	1.843
ACE2(6M0J)_138514465_uff_E=385.97	-5.5	4.319	3.278
ACE2(6M0J)_10715802_uff_E=497.31	-5.9	4.32	2.441
ACE2(6M0J)_46843962_uff_E=816.62	-5.2	4.327	2.516
ACE2(6M0J)_6604225_uff_E=488.78	-4.3	4.33	2.202
ACE2(6M0J)_95988134_uff_E=482.23	-4.5	4.332	2.318
ACE2(6M0J)_73331346_uff_E=611.27	-5.4	4.333	2.908
ACE2(6M0J)_6713927_uff_E=497.21	-5	4.339	2.349
ACE2(6M0J)_137467381_uff_E=489.66	-5.9	4.34	2.16
ACE2(6M0J)_127053185_uff_E=417.22	-4.5	4.342	3.159
ACE2(6M0J)_10687333_uff_E=410.19	-5.8	4.343	3.6
ACE2(6M0J)_71043635_uff_E=1668.80	-5.1	4.345	2.194
ACE2(6M0J)_90958864_uff_E=541.66	-5	4.345	2.413
ACE2(6M0J)_25171847_uff_E=476.88	-5.1	4.347	2.4
ACE2(6M0J)_118267131_uff_E=382.54	-5.3	4.348	2.87
ACE2(6M0J)_10712095_uff_E=399.63	-4.5	4.348	2.845
ACE2(6M0J)_14067764_uff_E=703.84	-5.5	4.349	2.753
ACE2(6M0J)_99908084_uff_E=713.20	-4.4	4.351	2.668
ACE2(6M0J)_44139588_uff_E=509.86	-5.6	4.352	2.899
ACE2(6M0J)_11794329_uff_E=432.53	-4.4	4.354	2.968
ACE2(6M0J)_131964498_uff_E=431.93	-4	4.355	2.453
ACE2(6M0J)_123872201_uff_E=1875.00	-4.7	4.359	2.399
ACE2(6M0J)_75218847_uff_E=520.97	-4.1	4.361	2.548
ACE2(6M0J)_10407853_uff_E=504.30	-4.5	4.364	2.292
ACE2(6M0J)_620370_uff_E=467.26	-5.2	4.365	3.2
ACE2(6M0J)_10406626_uff_E=512.41	-5.8	4.369	2.454
ACE2(6M0J)_21629991_uff_E=425.22	-4.8	4.376	2.593
ACE2(6M0J)_125429497_uff_E=567.88	-4.4	4.378	2.101
ACE2(6M0J)_14565584_uff_E=434.46	-4.4	4.379	2.529
ACE2(6M0J)_14565581_uff_E=465.26	-4.7	4.381	2.907
ACE2(6M0J)_118263231_uff_E=574.80	-5	4.391	2.36
ACE2(6M0J)_101592379_uff_E=353.83	-5.2	4.398	2.515
ACE2(6M0J)_101288398_uff_E=438.73	-4.7	4.401	2.509
ACE2(6M0J)_129603774_uff_E=553.99	-6.1	4.406	2.398
ACE2(6M0J)_137467368_uff_E=441.10	-5.1	4.408	3.064
ACE2(6M0J)_154178022_uff_E=368.39	-4.3	4.411	2.352
ACE2(6M0J)_14565584_uff_E=434.46	-4.4	4.412	2.263
ACE2(6M0J)_195522_uff_E=471.34	-4.7	4.413	3.384
ACE2(6M0J)_73330910_uff_E=648.69	-4.4	4.413	3.605
ACE2(6M0J)_71764910_uff_E=531.32	-4.3	4.417	2.746
ACE2(6M0J)_23424320_uff_E=445.80	-3.8	4.418	2.148
ACE2(6M0J)_10712095_uff_E=399.63	-4.9	4.422	2.894
ACE2(6M0J)_127253416_uff_E=553.99	-4.4	4.423	2.324
ACE2(6M0J)_75218864_uff_E=499.12	-2.5	4.425	2.495
ACE2(6M0J)_129895205_uff_E=525.50	-4.6	4.428	2.787
ACE2(6M0J)_978395_uff_E=436.39	-5.1	4.429	2.987
ACE2(6M0J)_14589761_uff_E=525.45	-4.5	4.433	2.517
ACE2(6M0J)_10574693_uff_E=486.37	-6.6	4.437	2.672
ACE2(6M0J)_71777464_uff_E=374.80	-4.9	4.438	2.759
ACE2(6M0J)_11794329_uff_E=432.53	-5.6	4.439	2.899
ACE2(6M0J)_10596108_uff_E=425.76	-5.3	4.441	2.845
ACE2(6M0J)_10787978_uff_E=533.30	-4.8	4.449	2.455
ACE2(6M0J)_132286496_uff_E=560.09	-5.4	4.452	2.39
ACE2(6M0J)_21629991_uff_E=425.22	-5.4	4.455	3.128
ACE2(6M0J)_125429419_uff_E=537.90	-5.2	4.46	2.232
ACE2(6M0J)_23424320_uff_E=445.80	-4.4	4.46	2.428
ACE2(6M0J)_118263248_uff_E=603.75	-3	4.46	3.235
ACE2(6M0J)_125427757_uff_E=524.66	-5.8	4.462	2.288
ACE2(6M0J)_125429426_uff_E=525.50	-6.1	4.467	2.208
ACE2(6M0J)_95988136_uff_E=478.36	-5.3	4.476	3.102
ACE2(6M0J)_73053256_uff_E=792.96	-4.5	4.476	2.691
ACE2(6M0J)_620368_uff_E=417.12	-5.4	4.477	2.887
ACE2(6M0J)_118267046_uff_E=447.92	-4.9	4.477	3.424
ACE2(6M0J)_23424320_uff_E=445.80	-4.7	4.477	2.458
ACE2(6M0J)_10407853_uff_E=504.30	-5.8	4.478	2.379
ACE2(6M0J)_131770040_uff_E=354.57	-5	4.478	2.661
ACE2(6M0J)_4125561_uff_E=421.60	-4.7	4.479	2.522
ACE2(6M0J)_44139586_uff_E=530.12	-4	4.479	2.336
ACE2(6M0J)_10406626_uff_E=512.41	-5.8	4.48	2.511
ACE2(6M0J)_44566068_uff_E=401.62	-5.8	4.48	2.484
ACE2(6M0J)_148240297_uff_E=338.09	-5.3	4.48	2.159
ACE2(6M0J)_129895176_uff_E=504.54	-4.5	4.482	2.44
ACE2(6M0J)_102066898_uff_E=415.66	-4.8	4.485	2.437
ACE2(6M0J)_147554572_uff_E=341.50	-4.5	4.486	2.619
ACE2(6M0J)_142550519_uff_E=411.61	-5	4.488	3.121
ACE2(6M0J)_137467381_uff_E=489.66	-5.7	4.492	2.329
ACE2(6M0J)_25171847_uff_E=476.88	-5	4.492	2.257
ACE2(6M0J)_101592379_uff_E=353.83	-5.9	4.494	3.042
ACE2(6M0J)_44566064_uff_E=432.11	-4.6	4.494	3.152
ACE2(6M0J)_98058925_uff_E=284.04	-5.4	4.499	2.863
ACE2(6M0J)_195522_uff_E=471.34	-5.1	4.501	2.693
ACE2(6M0J)_125428703_uff_E=526.27	-4.2	4.503	2.228
ACE2(6M0J)_89054741_uff_E=556.64	-4.2	4.505	3.081
ACE2(6M0J)_6713927_uff_E=497.21	-4.8	4.51	2.567
ACE2(6M0J)_119091269_uff_E=287.41	-4.7	4.51	1.778
ACE2(6M0J)_617268_uff_E=361.47	-5.3	4.515	2.868
ACE2(6M0J)_586858_uff_E=517.53	-5.2	4.517	2.457
ACE2(6M0J)_142550538_uff_E=347.64	-5.1	4.522	2.942
ACE2(6M0J)_139584816_uff_E=463.51	-5.3	4.524	2.624
ACE2(6M0J)_630845_uff_E=373.54	-5.5	4.526	3.292
ACE2(6M0J)_23424320_uff_E=445.80	-3.9	4.526	2.773
ACE2(6M0J)_129895451_uff_E=502.94	-4	4.531	2.088
ACE2(6M0J)_629676_uff_E=362.11	-4.9	4.534	3.247
ACE2(6M0J)_138514335_uff_E=406.05	-5.1	4.539	3.4
ACE2(6M0J)_125429178_uff_E=504.54	-4.3	4.541	2.148
ACE2(6M0J)_25171635_uff_E=456.32	-5.1	4.544	3.106
ACE2(6M0J)_132285856_uff_E=542.41	-1	4.546	2.584
ACE2(6M0J)_941385_uff_E=474.79	-4.8	4.548	3.029
ACE2(6M0J)_75218801_uff_E=494.49	-4.7	4.548	2.505
ACE2(6M0J)_154388188_uff_E=342.57	-4.6	4.548	2.079
ACE2(6M0J)_57392201_uff_E=381.98	-4.7	4.55	2.662
ACE2(6M0J)_154593892_uff_E=383.60	-4.4	4.552	3.043
ACE2(6M0J)_10810923_uff_E=477.96	-4.3	4.552	2.553
ACE2(6M0J)_85199072_uff_E=427.63	-4.7	4.556	2.719
ACE2(6M0J)_441140_uff_E=466.49	-4.5	4.562	2.772
ACE2(6M0J)_10596108_uff_E=425.76	-4.8	4.563	2.725
ACE2(6M0J)_118267045_uff_E=475.47	-5.1	4.567	3.248
ACE2(6M0J)_125429498_uff_E=568.24	-4.2	4.568	1.721
ACE2(6M0J)_118267097_uff_E=473.76	-4.7	4.573	2.479
ACE2(6M0J)_118267046_uff_E=447.92	-5	4.574	2.717
ACE2(6M0J)_14589751_uff_E=447.75	-5	4.574	1.876
ACE2(6M0J)_14565589_uff_E=493.87	-5.1	4.575	2.375
ACE2(6M0J)_139588134_uff_E=457.99	-4.8	4.579	2.687
ACE2(6M0J)_14565581_uff_E=465.26	-5.1	4.584	3.475
ACE2(6M0J)_161302_uff_E=363.38	-5.2	4.585	2.7
ACE2(6M0J)_57397526_uff_E=321.86	-4.8	4.59	2.93
ACE2(6M0J)_118267049_uff_E=466.20	-4.7	4.591	2.979
ACE2(6M0J)_98125635_uff_E=587.84	-3.5	4.6	2.899
ACE2(6M0J)_10691458_uff_E=474.28	-4.7	4.603	2.563
ACE2(6M0J)_98058927_uff_E=293.39	-5.2	4.605	3.08
ACE2(6M0J)_10761572_uff_E=428.30	-5.4	4.606	3.255
ACE2(6M0J)_10691458_uff_E=474.28	-5.1	4.607	2.602
ACE2(6M0J)_131975182_uff_E=561.17	-5.9	4.608	2.235
ACE2(6M0J)_125429127_uff_E=505.08	-3.7	4.608	2.616
ACE2(6M0J)_125428703_uff_E=526.27	-4	4.612	2.757
ACE2(6M0J)_142550519_uff_E=411.61	-5.1	4.613	3.32
ACE2(6M0J)_10668598_uff_E=474.70	-5.5	4.615	2.475
ACE2(6M0J)_631655_uff_E=461.61	-5.1	4.616	2.86
ACE2(6M0J)_6604225_uff_E=488.78	-4.4	4.618	2.805
ACE2(6M0J)_131975182_uff_E=561.17	-6.2	4.622	2.152
ACE2(6M0J)_125429840_uff_E=506.48	-3.4	4.622	3.321
ACE2(6M0J)_21677662_uff_E=400.18	-5.1	4.623	3.212
ACE2(6M0J)_134126307_uff_E=430.18	-4.5	4.625	2.52
ACE2(6M0J)_118254099_uff_E=523.14	-5.5	4.626	3.025
ACE2(6M0J)_137641183_uff_E=530.84	-4.5	4.629	2.449
ACE2(6M0J)_133688441_uff_E=267.44	-4.4	4.631	3.507
ACE2(6M0J)_118218025_uff_E=467.72	-4.5	4.632	2.381
ACE2(6M0J)_132286359_uff_E=505.08	-4.7	4.635	2.329
ACE2(6M0J)_10810923_uff_E=477.96	-5.7	4.647	3.166
ACE2(6M0J)_118263245_uff_E=614.68	-5.7	4.647	2.886
ACE2(6M0J)_118267073_uff_E=557.12	-5.1	4.655	2.433
ACE2(6M0J)_73053256_uff_E=792.96	-4.6	4.655	2.77
ACE2(6M0J)_129894893_uff_E=493.62	-3.7	4.655	2.916
ACE2(6M0J)_101592379_uff_E=353.83	-5.7	4.656	3.176
ACE2(6M0J)_137467528_uff_E=393.76	-5.2	4.659	3.557
ACE2(6M0J)_142550524_uff_E=360.94	-4.3	4.662	3.055
ACE2(6M0J)_68727702_uff_E=407.12	-4.2	4.67	2.478
ACE2(6M0J)_102066899_uff_E=443.95	-4.9	4.672	3.401
ACE2(6M0J)_118263269_uff_E=1102.50	-3.9	4.673	3.08
ACE2(6M0J)_21629991_uff_E=425.22	-4.8	4.68	2.966
ACE2(6M0J)_135027778_uff_E=580.27	-4.1	4.68	2.602
ACE2(6M0J)_118267096_uff_E=623.75	-3.7	4.685	2.435
ACE2(6M0J)_144564067_uff_E=408.10	-5	4.686	2.72
ACE2(6M0J)_137467447_uff_E=315.96	-5.7	4.687	2.92
ACE2(6M0J)_14589753_uff_E=472.14	-4.7	4.688	2.544
ACE2(6M0J)_11794329_uff_E=432.53	-4.2	4.691	2.991
ACE2(6M0J)_129010273_uff_E=436.64	-4.7	4.692	2.635
ACE2(6M0J)_137658162_uff_E=447.07	-4.7	4.693	3.084
ACE2(6M0J)_46843964_uff_E=523.87	-5	4.697	3.212
ACE2(6M0J)_44566051_uff_E=374.99	-4.9	4.7	2.997
ACE2(6M0J)_298140_uff_E=400.18	-4.7	4.7	3.023
ACE2(6M0J)_142550524_uff_E=360.94	-4.9	4.701	2.709
ACE2(6M0J)_71764910_uff_E=531.32	-5.9	4.709	2.51
ACE2(6M0J)_46844022_uff_E=503.08	-3.9	4.71	3.512
ACE2(6M0J)_142550538_uff_E=347.64	-5.4	4.711	3.323
ACE2(6M0J)_44566077_uff_E=490.23	-4.8	4.714	2.873
ACE2(6M0J)_44565973_uff_E=439.63	-4.9	4.715	2.487
ACE2(6M0J)_3512_uff_E=436.39	-4.6	4.716	2.644
ACE2(6M0J)_941385_uff_E=474.79	-4.6	4.718	3.152
ACE2(6M0J)_10574693_uff_E=486.37	-5.3	4.72	2.825
ACE2(6M0J)_11794329_uff_E=432.53	-4.3	4.72	2.862
ACE2(6M0J)_56924747_uff_E=515.53	-5.5	4.722	2.157
ACE2(6M0J)_289550_uff_E=239.38	-4.2	4.724	3.273
ACE2(6M0J)_98125634_uff_E=613.87	-4.6	4.727	3.012
ACE2(6M0J)_75218825_uff_E=478.84	-4.4	4.727	2.252
ACE2(6M0J)_102066898_uff_E=415.66	-4.1	4.729	3.091
ACE2(6M0J)_70658189_uff_E=385.06	-5.3	4.731	2.689
ACE2(6M0J)_98058924_uff_E=293.41	-5.2	4.733	3.214
ACE2(6M0J)_4125561_uff_E=421.60	-5	4.733	2.794
ACE2(6M0J)_137647518_uff_E=469.45	-4.9	4.736	2.914
ACE2(6M0J)_71317161_uff_E=422.79	-4.6	4.737	2.797
ACE2(6M0J)_14589753_uff_E=472.14	-5	4.748	1.822
ACE2(6M0J)_131975182_uff_E=561.17	-5.1	4.749	2.573
ACE2(6M0J)_10785158_uff_E=562.11	-4.9	4.752	3.397
ACE2(6M0J)_118254103_uff_E=631.96	-4.3	4.762	3.054
ACE2(6M0J)_10693960_uff_E=552.84	-4.1	4.763	2.392
ACE2(6M0J)_176431_uff_E=457.70	-5.1	4.765	3.346
ACE2(6M0J)_154388188_uff_E=342.57	-4.2	4.767	2.53
ACE2(6M0J)_630845_uff_E=373.54	-5.2	4.769	2.964
ACE2(6M0J)_118263231_uff_E=574.80	-5	4.769	3.119
ACE2(6M0J)_124301776_uff_E=496.28	-5	4.769	2.996
ACE2(6M0J)_57397526_uff_E=321.86	-4.8	4.769	3.494
ACE2(6M0J)_89798228_uff_E=373.07	-4.6	4.772	2.878
ACE2(6M0J)_44566031_uff_E=562.36	-5.2	4.773	3.759
ACE2(6M0J)_92222232_uff_E=435.92	-5.2	4.774	3.202
ACE2(6M0J)_11603327_uff_E=498.67	-4.9	4.775	3.264
ACE2(6M0J)_138514463_uff_E=391.15	-4.4	4.775	3.568
ACE2(6M0J)_11794329_uff_E=432.53	-4.7	4.78	2.755
ACE2(6M0J)_138490235_uff_E=829.78	-5.7	4.781	3.079
ACE2(6M0J)_92222230_uff_E=438.23	-5.1	4.782	2.854
ACE2(6M0J)_101592379_uff_E=353.83	-6.1	4.784	2.829
ACE2(6M0J)_73331348_uff_E=633.58	-5.5	4.786	2.539
ACE2(6M0J)_71764911_uff_E=490.07	-5.6	4.789	2.99
ACE2(6M0J)_73331772_uff_E=586.44	-1.9	4.789	2.986
ACE2(6M0J)_25171632_uff_E=683.46	-4.7	4.79	2.469
ACE2(6M0J)_14589751_uff_E=447.75	-4.7	4.792	2.536
ACE2(6M0J)_978395_uff_E=436.39	-4.3	4.794	2.774
ACE2(6M0J)_118263246_uff_E=636.92	-4.9	4.8	2.515
ACE2(6M0J)_70658189_uff_E=385.06	-4.8	4.802	2.737
ACE2(6M0J)_10787864_uff_E=481.64	-4.6	4.803	2.367
ACE2(6M0J)_153989287_uff_E=412.33	-5.3	4.806	2.706
ACE2(6M0J)_11794329_uff_E=432.53	-5.8	4.81	3.032
ACE2(6M0J)_566721_uff_E=474.85	-5	4.81	3.418
ACE2(6M0J)_91035900_uff_E=505.87	-4.4	4.811	2.418
ACE2(6M0J)_44565974_uff_E=433.18	-4.6	4.812	2.739
ACE2(6M0J)_118263269_uff_E=1102.50	-4	4.813	2.934
ACE2(6M0J)_154178022_uff_E=368.39	-5	4.814	2.484
ACE2(6M0J)_90958864_uff_E=541.66	-5.1	4.815	2.468
ACE2(6M0J)_102239942_uff_E=477.31	-5.5	4.82	2.971
ACE2(6M0J)_90958864_uff_E=541.66	-5	4.823	2.602
ACE2(6M0J)_125428749_uff_E=493.62	-3.4	4.826	2.981
ACE2(6M0J)_10497262_uff_E=397.63	-5	4.827	2.98
ACE2(6M0J)_6604225_uff_E=488.78	-4.5	4.827	3.04
ACE2(6M0J)_89798228_uff_E=373.07	-5.2	4.833	2.808
ACE2(6M0J)_25171846_uff_E=442.12	-4.9	4.836	3.205
ACE2(6M0J)_89798228_uff_E=373.07	-4.6	4.839	2.648
ACE2(6M0J)_75218825_uff_E=478.84	-4.6	4.84	2.739
ACE2(6M0J)_144564061_uff_E=397.26	-4.9	4.842	3.124
ACE2(6M0J)_119091269_uff_E=287.41	-4.4	4.842	2.188
ACE2(6M0J)_123361815_uff_E=380.82	-4.6	4.843	2.9
ACE2(6M0J)_22216755_uff_E=505.61	-4.7	4.849	2.87
ACE2(6M0J)_176431_uff_E=457.70	-4.7	4.85	2.982
ACE2(6M0J)_137467368_uff_E=441.10	-4.8	4.853	3.416
ACE2(6M0J)_10712095_uff_E=399.63	-5.8	4.854	3.096
ACE2(6M0J)_10619960_uff_E=518.46	-4.1	4.855	2.598
ACE2(6M0J)_586839_uff_E=882.59	-4.8	4.857	3.123
ACE2(6M0J)_129895222_uff_E=505.08	-4.7	4.861	2.635
ACE2(6M0J)_132286322_uff_E=531.16	-4.4	4.866	3.085
ACE2(6M0J)_10785158_uff_E=562.11	-4.4	4.869	3.182
ACE2(6M0J)_10763672_uff_E=488.17	-4.1	4.869	2.661
ACE2(6M0J)_14706665_uff_E=484.89	-5	4.87	2.899
ACE2(6M0J)_124024037_uff_E=377.64	-5.6	4.874	3.11
ACE2(6M0J)_154388188_uff_E=342.57	-4.8	4.874	2.343
ACE2(6M0J)_123872201_uff_E=1875.00	-5.1	4.875	2.289
ACE2(6M0J)_25171429_uff_E=423.15	-4.2	4.877	2.546
ACE2(6M0J)_137641183_uff_E=530.84	-5.7	4.879	2.457
ACE2(6M0J)_102239942_uff_E=477.31	-6.2	4.887	3.022
ACE2(6M0J)_73330911_uff_E=636.92	-3.3	4.887	2.524
ACE2(6M0J)_137658162_uff_E=447.07	-4.6	4.888	3.011
ACE2(6M0J)_25171846_uff_E=442.12	-5.2	4.889	3.226
ACE2(6M0J)_131975182_uff_E=561.17	-4.9	4.889	2.914
ACE2(6M0J)_153989287_uff_E=412.33	-5	4.891	2.778
ACE2(6M0J)_131964492_uff_E=498.10	-5.2	4.892	3.301
ACE2(6M0J)_10019062_uff_E=415.66	-5.1	4.895	2.984
ACE2(6M0J)_44148513_uff_E=442.54	-4.3	4.895	2.896
ACE2(6M0J)_125429634_uff_E=502.94	-4	4.896	2.269
ACE2(6M0J)_161302_uff_E=363.38	-5.1	4.899	3.039
ACE2(6M0J)_978395_uff_E=436.39	-4.6	4.9	3.073
ACE2(6M0J)_138514336_uff_E=331.78	-5.1	4.902	3.582
ACE2(6M0J)_40455568_uff_E=387.73	-4.5	4.903	3.099
ACE2(6M0J)_118263273_uff_E=1882.98	-5.3	4.904	2.848
ACE2(6M0J)_25171636_uff_E=493.57	-4.8	4.905	2.771
ACE2(6M0J)_118263248_uff_E=603.75	-3.3	4.908	2.68
ACE2(6M0J)_118263237_uff_E=588.21	-5.3	4.909	3.026
ACE2(6M0J)_10690292_uff_E=457.16	-6	4.91	3.019
ACE2(6M0J)_10761572_uff_E=428.30	-4.6	4.91	3.039
ACE2(6M0J)_92860931_uff_E=404.45	-4.5	4.91	3.494
ACE2(6M0J)_137647518_uff_E=469.45	-5.2	4.913	2.784
ACE2(6M0J)_73331349_uff_E=627.67	-5.4	4.914	2.42
ACE2(6M0J)_118267045_uff_E=475.47	-4.7	4.918	3.08
ACE2(6M0J)_14589759_uff_E=441.86	-4.7	4.919	2.501
ACE2(6M0J)_10574693_uff_E=486.37	-4.7	4.921	2.657
ACE2(6M0J)_118263228_uff_E=472.25	-5.6	4.923	2.915
ACE2(6M0J)_14565589_uff_E=493.87	-4.6	4.923	3.031
ACE2(6M0J)_56950704_uff_E=442.06	-4.3	4.933	2.374
ACE2(6M0J)_118263243_uff_E=326.16	-4.9	4.937	3.162
ACE2(6M0J)_14589753_uff_E=472.14	-4.8	4.937	2.076
ACE2(6M0J)_73331490_uff_E=626.42	-4	4.94	2.385
ACE2(6M0J)_118254145_uff_E=558.28	-5.3	4.942	2.771
ACE2(6M0J)_10019062_uff_E=415.66	-5	4.943	2.893
ACE2(6M0J)_137647518_uff_E=469.45	-4.7	4.943	2.881
ACE2(6M0J)_134126306_uff_E=422.13	-4.1	4.945	3.322
ACE2(6M0J)_102239942_uff_E=477.31	-5	4.949	2.693
ACE2(6M0J)_91035900_uff_E=505.87	-4.5	4.951	2.699
ACE2(6M0J)_76970921_uff_E=483.51	-4.8	4.953	3.268
ACE2(6M0J)_14565584_uff_E=434.46	-4.7	4.954	2.92
ACE2(6M0J)_98058926_uff_E=284.11	-5.2	4.955	3.2
ACE2(6M0J)_101592382_uff_E=439.16	-4.8	4.955	2.738
ACE2(6M0J)_73331490_uff_E=626.42	-5.8	4.957	2.481
ACE2(6M0J)_132285856_uff_E=542.41	-1.7	4.958	2.498
ACE2(6M0J)_139584816_uff_E=463.51	-5.1	4.965	3.076
ACE2(6M0J)_85199072_uff_E=427.63	-4.7	4.966	2.665
ACE2(6M0J)_102066899_uff_E=443.95	-5.8	4.969	3.204
ACE2(6M0J)_44566078_uff_E=549.87	-5.3	4.97	2.318
ACE2(6M0J)_134126306_uff_E=422.13	-4.7	4.97	2.579
ACE2(6M0J)_10761572_uff_E=428.30	-6.3	4.972	3.132
ACE2(6M0J)_142550524_uff_E=360.94	-4.5	4.973	2.838
ACE2(6M0J)_131964498_uff_E=431.93	-5.1	4.974	3.134
ACE2(6M0J)_68024713_uff_E=427.25	-4.7	4.976	3.243
ACE2(6M0J)_127253416_uff_E=553.99	-4.1	4.976	2.983
ACE2(6M0J)_10497262_uff_E=397.63	-4.9	4.979	3.345
ACE2(6M0J)_131964506_uff_E=573.49	-4.5	4.979	2.339
ACE2(6M0J)_586839_uff_E=882.59	-4.6	4.984	2.853
ACE2(6M0J)_101749852_uff_E=396.61	-4.2	4.985	1.924
ACE2(6M0J)_138514334_uff_E=388.58	-5	4.986	3.168
ACE2(6M0J)_44566051_uff_E=374.99	-5	4.986	2.98
ACE2(6M0J)_139584816_uff_E=463.51	-4.6	4.986	2.844
ACE2(6M0J)_620370_uff_E=467.26	-4.4	4.986	3.353
ACE2(6M0J)_118267131_uff_E=382.54	-5.3	4.988	3.293
ACE2(6M0J)_138496616_uff_E=483.72	-4.8	4.99	3.229
ACE2(6M0J)_118263273_uff_E=1882.98	-4.7	4.99	2.538
ACE2(6M0J)_14589761_uff_E=525.45	-5.1	4.995	3.187
ACE2(6M0J)_22216755_uff_E=505.61	-4.7	4.999	2.812
ACE2(6M0J)_95988134_uff_E=482.23	-5.4	5	3.371
ACE2(6M0J)_14565587_uff_E=489.93	-4.9	5.005	3.086
ACE2(6M0J)_57392201_uff_E=381.98	-4.8	5.011	2.613
ACE2(6M0J)_10693960_uff_E=552.84	-4.9	5.012	2.858
ACE2(6M0J)_10693960_uff_E=552.84	-6.1	5.02	2.676
ACE2(6M0J)_46843899_uff_E=466.21	-5.4	5.021	3.062
ACE2(6M0J)_137467397_uff_E=418.62	-5	5.022	3.777
ACE2(6M0J)_10596108_uff_E=425.76	-6.1	5.025	3.196
ACE2(6M0J)_73331205_uff_E=629.44	-5.3	5.025	2.518
ACE2(6M0J)_611918_uff_E=475.46	-5.2	5.025	2.754
ACE2(6M0J)_138514336_uff_E=331.78	-5.1	5.025	2.761
ACE2(6M0J)_10837041_uff_E=552.85	-4.7	5.026	2.418
ACE2(6M0J)_46844023_uff_E=474.74	-5.5	5.027	3.77
ACE2(6M0J)_71312580_uff_E=422.79	-4.5	5.032	2.937
ACE2(6M0J)_118267073_uff_E=557.12	-4.5	5.034	2.648
ACE2(6M0J)_137647518_uff_E=469.45	-4.9	5.036	2.798
ACE2(6M0J)_123872201_uff_E=1875.00	-5.3	5.037	2.759
ACE2(6M0J)_14565585_uff_E=471.35	-5.3	5.04	2.923
ACE2(6M0J)_44566064_uff_E=432.11	-5	5.045	3.438
ACE2(6M0J)_46844138_uff_E=498.83	-2.9	5.045	2.78
ACE2(6M0J)_137647518_uff_E=469.45	-4.8	5.046	3.071
ACE2(6M0J)_125427758_uff_E=519.13	-3.3	5.057	2.135
ACE2(6M0J)_46843962_uff_E=816.62	-5.5	5.061	2.593
ACE2(6M0J)_71312580_uff_E=422.79	-4.6	5.062	3.27
ACE2(6M0J)_98125634_uff_E=613.87	-4.1	5.062	2.833
ACE2(6M0J)_25171633_uff_E=466.90	-5.4	5.063	2.322
ACE2(6M0J)_98125635_uff_E=587.84	-4.1	5.063	3.404
ACE2(6M0J)_91820110_uff_E=337.73	-4.8	5.069	3.13
ACE2(6M0J)_138514336_uff_E=331.78	-5.6	5.07	3.312
ACE2(6M0J)_5126442_uff_E=412.73	-5.1	5.075	3.034
ACE2(6M0J)_22216755_uff_E=505.61	-4.8	5.077	3.281
ACE2(6M0J)_10045461_uff_E=524.59	-4.6	5.078	3.098
ACE2(6M0J)_46843899_uff_E=466.21	-5.8	5.079	3
ACE2(6M0J)_75641496_uff_E=414.15	-5.5	5.081	3.157
ACE2(6M0J)_25171847_uff_E=476.88	-5	5.081	2.42
ACE2(6M0J)_10019062_uff_E=415.66	-4.7	5.09	3.079
ACE2(6M0J)_6452395_uff_E=485.14	-5.8	5.092	2.333
ACE2(6M0J)_10019062_uff_E=415.66	-4.9	5.099	3.272
ACE2(6M0J)_118207067_uff_E=773.99	-4.6	5.102	2.833
ACE2(6M0J)_138514336_uff_E=331.78	-5.6	5.103	3.304
ACE2(6M0J)_46844083_uff_E=525.07	-4.6	5.104	3.011
ACE2(6M0J)_98058926_uff_E=284.11	-5	5.105	2.467
ACE2(6M0J)_9974417_uff_E=422.04	-5	5.105	3.113
ACE2(6M0J)_73331347_uff_E=651.09	-5.7	5.108	2.602
ACE2(6M0J)_617713_uff_E=360.61	-5.5	5.109	3.559
ACE2(6M0J)_44148513_uff_E=442.54	-4.5	5.109	3.128
ACE2(6M0J)_10623284_uff_E=545.80	-4.5	5.11	2.442
ACE2(6M0J)_118254190_uff_E=511.99	-5.5	5.111	2.359
ACE2(6M0J)_134126306_uff_E=422.13	-4.2	5.112	2.677
ACE2(6M0J)_44139589_uff_E=599.15	-3.8	5.115	2.88
ACE2(6M0J)_118263273_uff_E=1882.98	-4.8	5.117	2.839
ACE2(6M0J)_127053184_uff_E=568.68	-4.7	5.118	2.849
ACE2(6M0J)_25171846_uff_E=442.12	-5	5.125	3.177
ACE2(6M0J)_102066898_uff_E=415.66	-3.9	5.125	3.064
ACE2(6M0J)_138514465_uff_E=385.97	-5.2	5.129	3.586
ACE2(6M0J)_131770040_uff_E=354.57	-5.1	5.13	3.306
ACE2(6M0J)_10691458_uff_E=474.28	-6.2	5.133	2.909
ACE2(6M0J)_10693960_uff_E=552.84	-5.2	5.139	2.566
ACE2(6M0J)_71317161_uff_E=422.79	-4.6	5.143	3.335
ACE2(6M0J)_118263231_uff_E=574.80	-5.6	5.144	2.993
ACE2(6M0J)_15086460_uff_E=467.63	-4.8	5.144	3.68
ACE2(6M0J)_118263273_uff_E=1882.98	-4.5	5.149	2.812
ACE2(6M0J)_10712095_uff_E=399.63	-5.7	5.156	3.209
ACE2(6M0J)_98125637_uff_E=650.71	-3.5	5.156	3.247
ACE2(6M0J)_129895481_uff_E=567.88	-4.7	5.158	2.046
ACE2(6M0J)_89798228_uff_E=373.07	-5	5.159	3.014
ACE2(6M0J)_71318420_uff_E=519.02	-4.9	5.161	3.484
ACE2(6M0J)_153989287_uff_E=412.33	-4.8	5.163	3.06
ACE2(6M0J)_10668598_uff_E=474.70	-5.4	5.164	3.301
ACE2(6M0J)_84820866_uff_E=608.30	-5.1	5.164	3.222
ACE2(6M0J)_46844083_uff_E=525.07	-4.1	5.166	2.209
ACE2(6M0J)_22216755_uff_E=505.61	-5	5.172	2.985
ACE2(6M0J)_11794329_uff_E=432.53	-5.8	5.176	3.131
ACE2(6M0J)_161302_uff_E=363.38	-5	5.183	2.991
ACE2(6M0J)_44148513_uff_E=442.54	-5.4	5.184	3.719
ACE2(6M0J)_131975182_uff_E=561.17	-4.7	5.184	2.563
ACE2(6M0J)_10761572_uff_E=428.30	-6	5.191	3.055
ACE2(6M0J)_22216755_uff_E=505.61	-5.2	5.192	3.027
ACE2(6M0J)_101749852_uff_E=396.61	-4.5	5.194	1.979
ACE2(6M0J)_101288398_uff_E=438.73	-5.9	5.199	2.689
ACE2(6M0J)_46844083_uff_E=525.07	-5.4	5.199	2.085
ACE2(6M0J)_73330911_uff_E=636.92	-3.5	5.199	2.363
ACE2(6M0J)_9974417_uff_E=422.04	-5.1	5.2	3.361
ACE2(6M0J)_98159926_uff_E=475.82	-4.8	5.2	2.524
ACE2(6M0J)_137467381_uff_E=489.66	-5.6	5.202	2.999
ACE2(6M0J)_44566051_uff_E=374.99	-5.1	5.203	3.403
ACE2(6M0J)_298140_uff_E=400.18	-4.7	5.203	2.581
ACE2(6M0J)_44566064_uff_E=432.11	-4.6	5.203	3.557
ACE2(6M0J)_129895443_uff_E=507.32	-4.3	5.209	2.761
ACE2(6M0J)_10497262_uff_E=397.63	-4.7	5.213	2.512
ACE2(6M0J)_138496616_uff_E=483.72	-5.2	5.216	3.563
ACE2(6M0J)_118254103_uff_E=631.96	-4	5.216	2.787
ACE2(6M0J)_586839_uff_E=882.59	-4.9	5.225	3.201
ACE2(6M0J)_57397526_uff_E=321.86	-5.2	5.228	3.316
ACE2(6M0J)_137652147_uff_E=534.82	-5.8	5.229	2.52
ACE2(6M0J)_90958864_uff_E=541.66	-5.3	5.229	2.922
ACE2(6M0J)_941385_uff_E=474.79	-4.8	5.229	2.689
ACE2(6M0J)_10497262_uff_E=397.63	-4.6	5.232	2.755
ACE2(6M0J)_46844079_uff_E=544.43	-5.1	5.239	2.587
ACE2(6M0J)_118263273_uff_E=1882.98	-4.8	5.245	2.718
ACE2(6M0J)_125429841_uff_E=499.93	-4.3	5.25	3.011
ACE2(6M0J)_118254142_uff_E=558.28	-5.4	5.253	3.709
ACE2(6M0J)_10810923_uff_E=477.96	-4.7	5.253	2.985
ACE2(6M0J)_57397526_uff_E=321.86	-4.8	5.257	3.798
ACE2(6M0J)_56950843_uff_E=482.15	-4.7	5.257	2.805
ACE2(6M0J)_14565584_uff_E=434.46	-5.1	5.258	2.912
ACE2(6M0J)_134126306_uff_E=422.13	-4.1	5.259	2.179
ACE2(6M0J)_46844137_uff_E=493.79	-4.5	5.262	2.52
ACE2(6M0J)_137467381_uff_E=489.66	-5.5	5.263	3.249
ACE2(6M0J)_131964505_uff_E=399.09	-5	5.267	3.452
ACE2(6M0J)_118218025_uff_E=467.72	-5.3	5.271	2.346
ACE2(6M0J)_74426566_uff_E=467.72	-4.3	5.273	2.359
ACE2(6M0J)_10621755_uff_E=626.37	-6.1	5.276	3.476
ACE2(6M0J)_119091269_uff_E=287.41	-4.3	5.285	2.532
ACE2(6M0J)_71777464_uff_E=374.80	-4.8	5.292	3.197
ACE2(6M0J)_75218847_uff_E=520.97	-3.8	5.292	2.333
ACE2(6M0J)_137467397_uff_E=418.62	-4.9	5.293	3.51
ACE2(6M0J)_147554572_uff_E=341.50	-4.5	5.294	2.408
ACE2(6M0J)_142550519_uff_E=411.61	-5.1	5.296	3.546
ACE2(6M0J)_10621755_uff_E=626.37	-3.2	5.296	2.424
ACE2(6M0J)_98159926_uff_E=475.82	-4.9	5.3	3.499
ACE2(6M0J)_132286457_uff_E=528.62	-3.5	5.301	2.837
ACE2(6M0J)_10687333_uff_E=410.19	-5.7	5.304	3.492
ACE2(6M0J)_10621755_uff_E=626.37	-3.4	5.305	2.5
ACE2(6M0J)_154388188_uff_E=342.57	-4.2	5.312	2.545
ACE2(6M0J)_11603327_uff_E=498.67	-5	5.317	3.175
ACE2(6M0J)_138514335_uff_E=406.05	-5	5.32	3.973
ACE2(6M0J)_118218025_uff_E=467.72	-4.3	5.32	2.568
ACE2(6M0J)_56691266_uff_E=482.23	-4.7	5.322	3.139
ACE2(6M0J)_10045461_uff_E=524.59	-4.1	5.322	2.509
ACE2(6M0J)_118263250_uff_E=523.14	-4.1	5.324	3.786
ACE2(6M0J)_71737790_uff_E=419.80	-4.7	5.327	3.257
ACE2(6M0J)_289550_uff_E=239.38	-4.5	5.328	2.147
ACE2(6M0J)_131975184_uff_E=547.56	-4.4	5.328	1.964
ACE2(6M0J)_98058925_uff_E=284.04	-5.3	5.33	3.76
ACE2(6M0J)_10763672_uff_E=488.17	-5.8	5.333	3.435
ACE2(6M0J)_23424320_uff_E=445.80	-4.1	5.333	3.027
ACE2(6M0J)_25171634_uff_E=425.00	-4.5	5.336	3.017
ACE2(6M0J)_57392201_uff_E=381.98	-4.9	5.338	3.326
ACE2(6M0J)_622712_uff_E=363.04	-4.9	5.339	2.299
ACE2(6M0J)_611918_uff_E=475.46	-5.1	5.353	2.542
ACE2(6M0J)_95988133_uff_E=478.45	-4.8	5.355	3.326
ACE2(6M0J)_10574693_uff_E=486.37	-4.8	5.356	3.054
ACE2(6M0J)_10837041_uff_E=552.85	-5.1	5.366	3.154
ACE2(6M0J)_134126307_uff_E=430.18	-4.6	5.366	3.574
ACE2(6M0J)_10787864_uff_E=481.64	-4.1	5.367	3.085
ACE2(6M0J)_137641183_uff_E=530.84	-5.7	5.373	2.187
ACE2(6M0J)_44566078_uff_E=549.87	-4.8	5.373	2.305
ACE2(6M0J)_71318422_uff_E=595.64	-4.9	5.375	3.636
ACE2(6M0J)_10642700_uff_E=509.25	-5.7	5.378	2.589
ACE2(6M0J)_144564067_uff_E=408.10	-4.7	5.381	2.755
ACE2(6M0J)_620370_uff_E=467.26	-4.3	5.382	3.258
ACE2(6M0J)_10642700_uff_E=509.25	-5.8	5.384	3.471
ACE2(6M0J)_89798228_uff_E=373.07	-4.6	5.398	2.418
ACE2(6M0J)_71043635_uff_E=1668.80	-4.5	5.399	2.414
ACE2(6M0J)_25171634_uff_E=425.00	-4.3	5.404	2.921
ACE2(6M0J)_22216755_uff_E=505.61	-4.8	5.406	2.871
ACE2(6M0J)_133688441_uff_E=267.44	-4.9	5.409	3.636
ACE2(6M0J)_4125561_uff_E=421.60	-5.1	5.411	3.513
ACE2(6M0J)_122400007_uff_E=563.29	-2.9	5.413	2.212
ACE2(6M0J)_98159926_uff_E=475.82	-5	5.414	2.95
ACE2(6M0J)_95988134_uff_E=482.23	-4.7	5.415	3.208
ACE2(6M0J)_118263233_uff_E=562.91	-3.9	5.418	2.775
ACE2(6M0J)_98125636_uff_E=608.30	-5.2	5.42	3.268
ACE2(6M0J)_44566078_uff_E=549.87	-4.4	5.422	2.161
ACE2(6M0J)_10623284_uff_E=545.80	-4	5.423	2.971
ACE2(6M0J)_118254179_uff_E=699.45	-5	5.424	2.437
ACE2(6M0J)_44565974_uff_E=433.18	-4.6	5.424	3.231
ACE2(6M0J)_46844022_uff_E=503.08	-3.5	5.425	2.93
ACE2(6M0J)_122400012_uff_E=584.80	-3.4	5.425	2.359
ACE2(6M0J)_144564067_uff_E=408.10	-4.5	5.429	3.126
ACE2(6M0J)_118254131_uff_E=612.52	-5.9	5.43	2.912
ACE2(6M0J)_95988133_uff_E=478.45	-5.3	5.432	2.658
ACE2(6M0J)_10406626_uff_E=512.41	-5.8	5.435	2.658
ACE2(6M0J)_118254182_uff_E=641.96	-4.6	5.436	2.842
ACE2(6M0J)_10668598_uff_E=474.70	-6.1	5.439	3.142
ACE2(6M0J)_129895176_uff_E=504.54	-5.7	5.44	2.612
ACE2(6M0J)_195521_uff_E=426.42	-4.6	5.44	3.607
ACE2(6M0J)_978395_uff_E=436.39	-4.7	5.442	3.207
ACE2(6M0J)_56950704_uff_E=442.06	-4.2	5.447	2.556
ACE2(6M0J)_101749852_uff_E=396.61	-5.3	5.449	3.587
ACE2(6M0J)_441140_uff_E=466.49	-4.7	5.449	3.449
ACE2(6M0J)_6604225_uff_E=488.78	-5	5.45	2.802
ACE2(6M0J)_92860931_uff_E=404.45	-5	5.45	3.438
ACE2(6M0J)_144564061_uff_E=397.26	-4.8	5.452	2.714
ACE2(6M0J)_10712095_uff_E=399.63	-6	5.46	3.352
ACE2(6M0J)_71043635_uff_E=1668.80	-4.9	5.462	3.121
ACE2(6M0J)_620242_uff_E=487.43	-4.8	5.462	3.446
ACE2(6M0J)_92222232_uff_E=435.92	-4.8	5.466	3.237
ACE2(6M0J)_131964492_uff_E=498.10	-4.6	5.471	2.2
ACE2(6M0J)_101749852_uff_E=396.61	-4.9	5.475	2.45
ACE2(6M0J)_10643661_uff_E=493.88	-5.6	5.477	3.592
ACE2(6M0J)_10621755_uff_E=626.37	-2.8	5.477	2.183
ACE2(6M0J)_131770040_uff_E=354.57	-4.9	5.479	2.619
ACE2(6M0J)_74426566_uff_E=467.72	-2.1	5.483	2.296
ACE2(6M0J)_10787978_uff_E=533.30	-4.3	5.485	2.71
ACE2(6M0J)_118254179_uff_E=699.45	-2.4	5.485	2.946
ACE2(6M0J)_127053184_uff_E=568.68	-4.8	5.486	2.587
ACE2(6M0J)_75218823_uff_E=527.02	-4.5	5.488	2.244
ACE2(6M0J)_118263248_uff_E=603.75	-4.7	5.489	3.212
ACE2(6M0J)_134126307_uff_E=430.18	-4	5.489	3.983
ACE2(6M0J)_71764911_uff_E=490.07	-5.7	5.49	3.012
ACE2(6M0J)_631655_uff_E=461.61	-4.4	5.491	3.395
ACE2(6M0J)_75218847_uff_E=520.97	-4.3	5.497	2.152
ACE2(6M0J)_46844082_uff_E=682.67	-6.1	5.51	2.901
ACE2(6M0J)_142550524_uff_E=360.94	-4.8	5.511	3.046
ACE2(6M0J)_10787978_uff_E=533.30	-6.2	5.513	3.971
ACE2(6M0J)_98159927_uff_E=447.95	-4.9	5.514	3.273
ACE2(6M0J)_118263273_uff_E=1882.98	-4.7	5.515	2.651
ACE2(6M0J)_46844022_uff_E=503.08	-4.1	5.515	3.427
ACE2(6M0J)_92222230_uff_E=438.23	-5.1	5.518	3.566
ACE2(6M0J)_44139586_uff_E=530.12	-3.9	5.524	2.46
ACE2(6M0J)_46844083_uff_E=525.07	-4.2	5.53	2.991
ACE2(6M0J)_75641496_uff_E=414.15	-4.9	5.531	3.325
ACE2(6M0J)_44139468_uff_E=480.55	-5.6	5.534	2.599
ACE2(6M0J)_122400007_uff_E=563.29	-3.2	5.536	2.609
ACE2(6M0J)_89798228_uff_E=373.07	-4.5	5.539	2.264
ACE2(6M0J)_73331344_uff_E=637.78	-4	5.54	3.702
ACE2(6M0J)_118254142_uff_E=558.28	-5.3	5.542	2.859
ACE2(6M0J)_10642700_uff_E=509.25	-5.7	5.544	3.18
ACE2(6M0J)_46843961_uff_E=566.24	-5.9	5.545	4.3
ACE2(6M0J)_76973812_uff_E=262.34	-5.1	5.547	2.863
ACE2(6M0J)_44566075_uff_E=523.32	-5.7	5.548	2.855
ACE2(6M0J)_127053184_uff_E=568.68	-4.9	5.553	3.149
ACE2(6M0J)_68727702_uff_E=407.12	-4.3	5.559	3.549
ACE2(6M0J)_56950704_uff_E=442.06	-4.1	5.565	2.62
ACE2(6M0J)_154388188_uff_E=342.57	-4.3	5.568	2.501
ACE2(6M0J)_10785158_uff_E=562.11	-6	5.569	3.775
ACE2(6M0J)_138496616_uff_E=483.72	-3.7	5.57	3.897
ACE2(6M0J)_10668598_uff_E=474.70	-5.3	5.573	2.576
ACE2(6M0J)_11603327_uff_E=498.67	-4	5.573	2.424
ACE2(6M0J)_118218025_uff_E=467.72	-5.4	5.574	2.399
ACE2(6M0J)_10810923_uff_E=477.96	-4.1	5.575	2.826
ACE2(6M0J)_14565587_uff_E=489.93	-5	5.577	2.889
ACE2(6M0J)_75218824_uff_E=483.43	-3.9	5.577	2.245
ACE2(6M0J)_298140_uff_E=400.18	-5	5.578	2.386
ACE2(6M0J)_71043635_uff_E=1668.80	-4.6	5.578	2.43
ACE2(6M0J)_131964498_uff_E=431.93	-4.2	5.578	3.039
ACE2(6M0J)_123361815_uff_E=380.82	-4.6	5.58	3.019
ACE2(6M0J)_154593892_uff_E=383.60	-5.1	5.584	3.697
ACE2(6M0J)_14589761_uff_E=525.45	-5	5.589	3.212
ACE2(6M0J)_44565973_uff_E=439.63	-4.8	5.591	2.644
ACE2(6M0J)_101749852_uff_E=396.61	-4.5	5.591	2.349
ACE2(6M0J)_144564061_uff_E=397.26	-4.6	5.595	2.465
ACE2(6M0J)_10407853_uff_E=504.30	-4.7	5.598	2.808
ACE2(6M0J)_10643661_uff_E=493.88	-4.4	5.599	2.737
ACE2(6M0J)_25171846_uff_E=442.12	-5.3	5.6	3.814
ACE2(6M0J)_25171634_uff_E=425.00	-4.4	5.6	3.132
ACE2(6M0J)_75218823_uff_E=527.02	-4.1	5.6	2.271
ACE2(6M0J)_123836216_uff_E=631.96	-4.3	5.601	3.216
ACE2(6M0J)_85199072_uff_E=427.63	-3.8	5.606	3.266
ACE2(6M0J)_586839_uff_E=882.59	-5.7	5.61	3.065
ACE2(6M0J)_11794329_uff_E=432.53	-5.7	5.611	3.919
ACE2(6M0J)_142550538_uff_E=347.64	-5.1	5.612	4.023
ACE2(6M0J)_10693960_uff_E=552.84	-4.7	5.613	2.411
ACE2(6M0J)_10019062_uff_E=415.66	-4.8	5.616	2.262
ACE2(6M0J)_620374_uff_E=372.95	-4.7	5.62	3.451
ACE2(6M0J)_44566051_uff_E=374.99	-4.6	5.621	2.669
ACE2(6M0J)_23424318_uff_E=443.60	-4.3	5.623	2.461
ACE2(6M0J)_71317161_uff_E=422.79	-5	5.626	2.698
ACE2(6M0J)_118254216_uff_E=633.63	-3.9	5.627	3.744
ACE2(6M0J)_25171634_uff_E=425.00	-5.1	5.628	2.852
ACE2(6M0J)_44139588_uff_E=509.86	-4.7	5.631	3.315
ACE2(6M0J)_122400007_uff_E=563.29	-2.1	5.631	2.186
ACE2(6M0J)_71317160_uff_E=364.50	-5.2	5.632	3.488
ACE2(6M0J)_44139589_uff_E=599.15	-5	5.634	3.112
ACE2(6M0J)_73053256_uff_E=792.96	-4.4	5.635	3.574
ACE2(6M0J)_14706665_uff_E=484.89	-4.3	5.638	3.163
ACE2(6M0J)_92222231_uff_E=448.41	-4.6	5.641	3.461
ACE2(6M0J)_46844137_uff_E=493.79	-4.9	5.642	3.036
ACE2(6M0J)_56950843_uff_E=482.15	-5.2	5.643	2.778
ACE2(6M0J)_10668598_uff_E=474.70	-3	5.644	3.374
ACE2(6M0J)_10406626_uff_E=512.41	-5	5.646	2.49
ACE2(6M0J)_10097_uff_E=554.35	-6.2	5.65	3.828
ACE2(6M0J)_75218847_uff_E=520.97	-3.9	5.657	2.319
ACE2(6M0J)_129010273_uff_E=436.64	-4.5	5.658	3.298
ACE2(6M0J)_10810923_uff_E=477.96	-5.5	5.66	3.644
ACE2(6M0J)_123872201_uff_E=1875.00	-4.7	5.661	2.955
ACE2(6M0J)_56950843_uff_E=482.15	-4.2	5.662	2.599
ACE2(6M0J)_71764910_uff_E=531.32	-4.2	5.662	3.108
ACE2(6M0J)_122400007_uff_E=563.29	-2.7	5.663	2.512
ACE2(6M0J)_25171636_uff_E=493.57	-5	5.665	2.85
ACE2(6M0J)_10407853_uff_E=504.30	-4.9	5.665	2.994
ACE2(6M0J)_68024713_uff_E=427.25	-4.5	5.665	2.351
ACE2(6M0J)_10787864_uff_E=481.64	-5.5	5.667	3.666
ACE2(6M0J)_11603327_uff_E=498.67	-4.9	5.672	2.215
ACE2(6M0J)_74426566_uff_E=467.72	-4.6	5.673	2.766
ACE2(6M0J)_137641183_uff_E=530.84	-4.1	5.674	2.45
ACE2(6M0J)_154388188_uff_E=342.57	-4.8	5.679	2.884
ACE2(6M0J)_68024713_uff_E=427.25	-4.7	5.68	2.232
ACE2(6M0J)_68727568_uff_E=497.72	-5	5.681	2.887
ACE2(6M0J)_123282608_uff_E=523.14	-4.2	5.682	4.031
ACE2(6M0J)_75218824_uff_E=483.43	-4.8	5.683	3.085
ACE2(6M0J)_10785158_uff_E=562.11	-5	5.684	3.606
ACE2(6M0J)_10763672_uff_E=488.17	-4.5	5.685	3.048
ACE2(6M0J)_10810923_uff_E=477.96	-4.4	5.685	2.505
ACE2(6M0J)_14565589_uff_E=493.87	-4.9	5.688	2.982
ACE2(6M0J)_71763717_uff_E=465.30	-4.9	5.689	3.426
ACE2(6M0J)_25171427_uff_E=451.54	-4.6	5.689	2.764
ACE2(6M0J)_101749852_uff_E=396.61	-4.2	5.69	2.228
ACE2(6M0J)_46844079_uff_E=544.43	-3.6	5.693	3.024
ACE2(6M0J)_144564067_uff_E=408.10	-4.4	5.695	2.152
ACE2(6M0J)_122400007_uff_E=563.29	-4.1	5.696	2.23
ACE2(6M0J)_10693960_uff_E=552.84	-6.3	5.699	4.263
ACE2(6M0J)_25171429_uff_E=423.15	-4.5	5.701	2.579
ACE2(6M0J)_9974417_uff_E=422.04	-4.8	5.702	2.587
ACE2(6M0J)_14589753_uff_E=472.14	-4.7	5.702	1.991
ACE2(6M0J)_10623284_uff_E=545.80	-4.1	5.702	2.526
ACE2(6M0J)_92222233_uff_E=448.40	-4.9	5.706	3.722
ACE2(6M0J)_98159926_uff_E=475.82	-4.7	5.708	2.024
ACE2(6M0J)_71043635_uff_E=1668.80	-4.6	5.709	2.571
ACE2(6M0J)_46843964_uff_E=523.87	-5	5.714	3.443
ACE2(6M0J)_10406626_uff_E=512.41	-6	5.717	2.433
ACE2(6M0J)_10407853_uff_E=504.30	-5	5.72	2.777
ACE2(6M0J)_154593892_uff_E=383.60	-5.2	5.722	4.096
ACE2(6M0J)_127053184_uff_E=568.68	-3.5	5.728	3.061
ACE2(6M0J)_101592382_uff_E=439.16	-5.4	5.729	2.353
ACE2(6M0J)_75218864_uff_E=499.12	-4	5.729	2.618
ACE2(6M0J)_74426566_uff_E=467.72	-3.6	5.73	3.077
ACE2(6M0J)_118254179_uff_E=699.45	-3.6	5.731	2.687
ACE2(6M0J)_10787978_uff_E=533.30	-5	5.733	2.119
ACE2(6M0J)_125429986_uff_E=507.32	-4.2	5.735	3.089
ACE2(6M0J)_75218864_uff_E=499.12	-5.1	5.736	2.647
ACE2(6M0J)_10763672_uff_E=488.17	-4.8	5.737	3.139
ACE2(6M0J)_941385_uff_E=474.79	-5	5.739	2.961
ACE2(6M0J)_44566064_uff_E=432.11	-4.6	5.74	3.744
ACE2(6M0J)_46844079_uff_E=544.43	-4.4	5.74	2.696
ACE2(6M0J)_46843962_uff_E=816.62	-5.1	5.741	2.505
ACE2(6M0J)_118263272_uff_E=1079.99	-2.7	5.742	2.542
ACE2(6M0J)_10763672_uff_E=488.17	-5.1	5.744	2.886
ACE2(6M0J)_118267049_uff_E=466.20	-4.7	5.749	3.5
ACE2(6M0J)_44566075_uff_E=523.32	-5.9	5.75	2.889
ACE2(6M0J)_10497262_uff_E=397.63	-5	5.75	2.571
ACE2(6M0J)_144564061_uff_E=397.26	-4.7	5.758	2.205
ACE2(6M0J)_14706665_uff_E=484.89	-4.7	5.759	2.735
ACE2(6M0J)_76968174_uff_E=424.16	-4.9	5.761	2.658
ACE2(6M0J)_153989287_uff_E=412.33	-4.6	5.763	2.835
ACE2(6M0J)_10763672_uff_E=488.17	-5.8	5.764	3.097
ACE2(6M0J)_46844022_uff_E=503.08	-4.7	5.765	4.536
ACE2(6M0J)_631655_uff_E=461.61	-5.2	5.769	3.036
ACE2(6M0J)_14565584_uff_E=434.46	-4.9	5.772	3.464
ACE2(6M0J)_10407853_uff_E=504.30	-6.1	5.773	2.867
ACE2(6M0J)_3082005_uff_E=446.17	-5	5.773	3.082
ACE2(6M0J)_71312580_uff_E=422.79	-4.6	5.773	2.677
ACE2(6M0J)_91564943_uff_E=503.49	-4.5	5.773	2.935
ACE2(6M0J)_118207067_uff_E=773.99	-4.3	5.773	2.34
ACE2(6M0J)_91564943_uff_E=503.49	-3.7	5.773	2.42
ACE2(6M0J)_131975184_uff_E=547.56	-5.1	5.776	3.286
ACE2(6M0J)_25171847_uff_E=476.88	-5	5.777	2.534
ACE2(6M0J)_127053184_uff_E=568.68	-5.3	5.78	3.433
ACE2(6M0J)_40455568_uff_E=387.73	-5.1	5.781	3.282
ACE2(6M0J)_118207067_uff_E=773.99	-5.1	5.783	2.28
ACE2(6M0J)_127053185_uff_E=417.22	-5	5.784	3.563
ACE2(6M0J)_101288398_uff_E=438.73	-5.9	5.789	3.746
ACE2(6M0J)_76968174_uff_E=424.16	-4.6	5.79	3.179
ACE2(6M0J)_56950843_uff_E=482.15	-5.7	5.793	2.293
ACE2(6M0J)_118254232_uff_E=631.91	-4.4	5.795	3.202
ACE2(6M0J)_118218025_uff_E=467.72	-4.8	5.799	3.165
ACE2(6M0J)_10619960_uff_E=518.46	-6	5.802	2.647
ACE2(6M0J)_25171428_uff_E=435.54	-4.9	5.802	3.555
ACE2(6M0J)_14589751_uff_E=447.75	-4.8	5.802	2.394
ACE2(6M0J)_10643661_uff_E=493.88	-4.5	5.804	3.371
ACE2(6M0J)_10642700_uff_E=509.25	-5.8	5.805	3.386
ACE2(6M0J)_91820110_uff_E=337.73	-5	5.805	3.066
ACE2(6M0J)_14565589_uff_E=493.87	-4.7	5.805	3.34
ACE2(6M0J)_131964506_uff_E=573.49	-3.9	5.805	1.912
ACE2(6M0J)_101749852_uff_E=396.61	-5.8	5.806	2.896
ACE2(6M0J)_71312580_uff_E=422.79	-4.8	5.808	2.875
ACE2(6M0J)_91564943_uff_E=503.49	-4.3	5.808	2.094
ACE2(6M0J)_44565973_uff_E=439.63	-5	5.809	3.064
ACE2(6M0J)_118254131_uff_E=612.52	-5.6	5.818	2.949
ACE2(6M0J)_10097_uff_E=554.35	-4.8	5.818	3
ACE2(6M0J)_21677661_uff_E=485.34	-4.7	5.825	3.008
ACE2(6M0J)_71312580_uff_E=422.79	-4.9	5.826	3.248
ACE2(6M0J)_138514465_uff_E=385.97	-5	5.829	3.558
ACE2(6M0J)_76964619_uff_E=417.09	-4.2	5.829	3.755
ACE2(6M0J)_46843899_uff_E=466.21	-5.5	5.83	2.62
ACE2(6M0J)_135027778_uff_E=580.27	-3.9	5.83	2.379
ACE2(6M0J)_592609_uff_E=494.95	-4.9	5.832	3.046
ACE2(6M0J)_10837041_uff_E=552.85	-4.2	5.832	3.482
ACE2(6M0J)_25171849_uff_E=574.34	-5.4	5.834	3.526
ACE2(6M0J)_101749855_uff_E=354.12	-4.8	5.834	3.681
ACE2(6M0J)_11794329_uff_E=432.53	-4.5	5.834	2.706
ACE2(6M0J)_441140_uff_E=466.49	-4.5	5.835	2.766
ACE2(6M0J)_10761572_uff_E=428.30	-5.6	5.836	3.463
ACE2(6M0J)_118263233_uff_E=562.91	-5.2	5.836	2.837
ACE2(6M0J)_118218025_uff_E=467.72	-5.7	5.838	2.361
ACE2(6M0J)_102066898_uff_E=415.66	-4.8	5.838	2.827
ACE2(6M0J)_75218825_uff_E=478.84	-3.4	5.838	2.913
ACE2(6M0J)_10687333_uff_E=410.19	-5.7	5.841	2.626
ACE2(6M0J)_10837041_uff_E=552.85	-6.3	5.842	4.219
ACE2(6M0J)_25171847_uff_E=476.88	-5.2	5.842	2.11
ACE2(6M0J)_10787978_uff_E=533.30	-4	5.846	2.094
ACE2(6M0J)_611914_uff_E=389.12	-5.5	5.848	2.688
ACE2(6M0J)_10787864_uff_E=481.64	-4.4	5.849	2.459
ACE2(6M0J)_118263243_uff_E=326.16	-5.2	5.852	3.558
ACE2(6M0J)_74426566_uff_E=467.72	-4.6	5.852	2.557
ACE2(6M0J)_40455568_uff_E=387.73	-4.5	5.853	3.285
ACE2(6M0J)_98125637_uff_E=650.71	-3.7	5.854	3.509
ACE2(6M0J)_44566077_uff_E=490.23	-4.1	5.858	3.554
ACE2(6M0J)_10045461_uff_E=524.59	-5	5.859	2.813
ACE2(6M0J)_161302_uff_E=363.38	-5	5.859	2.91
ACE2(6M0J)_44139590_uff_E=680.31	-3.7	5.86	3.595
ACE2(6M0J)_10097_uff_E=554.35	-5.8	5.863	2.443
ACE2(6M0J)_10621755_uff_E=626.37	-2.7	5.866	2.587
ACE2(6M0J)_46843965_uff_E=501.88	-5.1	5.869	3.146
ACE2(6M0J)_56950843_uff_E=482.15	-3.3	5.869	2.374
ACE2(6M0J)_118263273_uff_E=1882.98	-5	5.873	3.224
ACE2(6M0J)_176431_uff_E=457.70	-4.8	5.874	3.754
ACE2(6M0J)_441140_uff_E=466.49	-4.8	5.875	2.949
ACE2(6M0J)_10810923_uff_E=477.96	-4.6	5.875	2.748
ACE2(6M0J)_123872201_uff_E=1875.00	-5.2	5.88	3.099
ACE2(6M0J)_46844079_uff_E=544.43	-5.7	5.882	3.238
ACE2(6M0J)_137652147_uff_E=534.82	-5.6	5.882	2.693
ACE2(6M0J)_14565589_uff_E=493.87	-4.5	5.884	3.086
ACE2(6M0J)_154178022_uff_E=368.39	-4.7	5.887	2.191
ACE2(6M0J)_46844024_uff_E=467.06	-5.1	5.891	2.917
ACE2(6M0J)_71317161_uff_E=422.79	-4.8	5.892	2.901
ACE2(6M0J)_118267046_uff_E=447.92	-5	5.893	3.58
ACE2(6M0J)_10787864_uff_E=481.64	-4.5	5.893	2.672
ACE2(6M0J)_101592382_uff_E=439.16	-4.8	5.894	2.064
ACE2(6M0J)_10687333_uff_E=410.19	-5.9	5.896	3.139
ACE2(6M0J)_10643661_uff_E=493.88	-5.5	5.897	3.542
[truncated: 1,915 more rows]

## Sheet: PyRx_RBD
Ligand	Binding Affinity	rmsd/ub	rmsd/lb
6M0JRDB_118254179_uff_E=699.45	-7.1	0	0
6M0JRDB_127053184_uff_E=568.68	-7.1	0	0
6M0JRDB_73331346_uff_E=611.27	-7	0	0
6M0JRDB_73331488_uff_E=637.67	-7	0	0
6M0JRDB_56950846_uff_E=485.31	-6.9	0	0
6M0JRDB_73330911_uff_E=636.92	-6.9	0	0
6M0JRDB_118254179_uff_E=699.45	-6.9	5.454	2.601
6M0JRDB_118263246_uff_E=636.92	-6.9	0	0
6M0JRDB_123293391_uff_E=636.92	-6.9	0	0
6M0JRDB_127053184_uff_E=568.68	-6.9	3.243	2.627
6M0JRDB_137652147_uff_E=534.82	-6.9	0	0
6M0JRDB_125429633_uff_E=507.88	-6.8	3.828	1.804
6M0JRDB_125429633_uff_E=507.88	-6.8	0	0
6M0JRDB_25171637_uff_E=456.94	-6.8	0	0
6M0JRDB_70876805_uff_E=498.65	-6.8	0	0
6M0JRDB_73331345_uff_E=668.75	-6.8	0	0
6M0JRDB_73331346_uff_E=611.27	-6.8	6.266	2.795
6M0JRDB_73331347_uff_E=651.09	-6.8	0	0
6M0JRDB_44139586_uff_E=530.12	-6.8	0	0
6M0JRDB_127053185_uff_E=417.22	-6.8	0	0
6M0JRDB_46844082_uff_E=682.67	-6.7	4.611	0.742
6M0JRDB_46844082_uff_E=682.67	-6.7	0	0
6M0JRDB_70876805_uff_E=498.65	-6.7	5.833	2.466
6M0JRDB_73331349_uff_E=627.67	-6.7	0	0
6M0JRDB_73331490_uff_E=626.42	-6.7	1.325	0.935
6M0JRDB_73331490_uff_E=626.42	-6.7	0	0
6M0JRDB_75218825_uff_E=478.84	-6.7	0	0
6M0JRDB_118254142_uff_E=558.28	-6.7	0	0
6M0JRDB_118254145_uff_E=558.28	-6.7	0	0
6M0JRDB_118254179_uff_E=699.45	-6.7	1.674	1.508
6M0JRDB_127053185_uff_E=417.22	-6.7	6.753	4.244
6M0JRDB_44139588_uff_E=509.86	-6.7	0	0
6M0JRDB_25171633_uff_E=466.90	-6.7	6.094	2.699
6M0JRDB_25171633_uff_E=466.90	-6.7	0	0
6M0JRDB_73331772_uff_E=586.44	-6.6	0	0
6M0JRDB_44566075_uff_E=523.32	-6.6	0	0
6M0JRDB_46844082_uff_E=682.67	-6.6	11.266	4.873
6M0JRDB_73330764_uff_E=710.57	-6.6	0	0
6M0JRDB_73331208_uff_E=661.17	-6.6	0	0
6M0JRDB_73331345_uff_E=668.75	-6.6	3.969	2.879
6M0JRDB_73331348_uff_E=633.58	-6.6	0	0
6M0JRDB_73331349_uff_E=627.67	-6.6	6.442	2.812
6M0JRDB_73331490_uff_E=626.42	-6.6	6.481	2.783
6M0JRDB_73331491_uff_E=631.59	-6.6	0	0
6M0JRDB_75218825_uff_E=478.84	-6.6	2.614	2.005
6M0JRDB_118254232_uff_E=631.91	-6.6	0	0
6M0JRDB_127053184_uff_E=568.68	-6.6	6.262	4.084
6M0JRDB_25171635_uff_E=456.32	-6.6	0	0
6M0JRDB_25171849_uff_E=574.34	-6.6	0	0
6M0JRDB_25172057_uff_E=459.89	-6.6	0	0
6M0JRDB_46844024_uff_E=467.06	-6.6	0	0
6M0JRDB_125429633_uff_E=507.88	-6.5	5.729	2.618
6M0JRDB_125429633_uff_E=507.88	-6.5	2.813	2.111
6M0JRDB_25171637_uff_E=456.94	-6.5	5.85	2.563
6M0JRDB_25171637_uff_E=456.94	-6.5	2.048	1.643
6M0JRDB_46844082_uff_E=682.67	-6.5	10.825	6.955
6M0JRDB_46844082_uff_E=682.67	-6.5	10.852	4.684
6M0JRDB_70876805_uff_E=498.65	-6.5	1.516	1.139
6M0JRDB_70876805_uff_E=498.65	-6.5	5.95	2.378
6M0JRDB_73330763_uff_E=714.76	-6.5	0	0
6M0JRDB_73330911_uff_E=636.92	-6.5	4.386	3.047
6M0JRDB_73331345_uff_E=668.75	-6.5	5.353	3.837
6M0JRDB_73331345_uff_E=668.75	-6.5	6.162	2.795
6M0JRDB_73331346_uff_E=611.27	-6.5	2.434	1.825
6M0JRDB_75218825_uff_E=478.84	-6.5	1.771	1.638
6M0JRDB_118254083_uff_E=620.90	-6.5	0	0
6M0JRDB_118254213_uff_E=644.51	-6.5	0	0
6M0JRDB_118254214_uff_E=630.93	-6.5	0	0
6M0JRDB_142550537_uff_E=823.03	-6.5	0	0
6M0JRDB_147116578_uff_E=520.21	-6.5	0	0
6M0JRDB_44566031_uff_E=562.36	-6.5	0	0
6M0JRDB_25172057_uff_E=459.89	-6.5	5.745	2.258
6M0JRDB_46844024_uff_E=467.06	-6.5	5.548	2.4
6M0JRDB_132286397_uff_E=602.85	-6.4	0	0
6M0JRDB_125429634_uff_E=502.94	-6.4	0	0
6M0JRDB_46844022_uff_E=503.08	-6.4	0	0
6M0JRDB_46844082_uff_E=682.67	-6.4	4.697	1.385
6M0JRDB_46844082_uff_E=682.67	-6.4	12.488	9.061
6M0JRDB_46844082_uff_E=682.67	-6.4	8.433	3.518
6M0JRDB_46844082_uff_E=682.67	-6.4	7.23	2.335
6M0JRDB_56950846_uff_E=485.31	-6.4	2.843	2.104
6M0JRDB_70870984_uff_E=487.13	-6.4	0	0
6M0JRDB_73330625_uff_E=631.30	-6.4	0	0
6M0JRDB_73330911_uff_E=636.92	-6.4	1.505	1.147
6M0JRDB_73331346_uff_E=611.27	-6.4	5.471	2.692
6M0JRDB_73331348_uff_E=633.58	-6.4	3.977	2.815
6M0JRDB_73331487_uff_E=640.93	-6.4	0	0
6M0JRDB_73331488_uff_E=637.67	-6.4	1.464	1.12
6M0JRDB_73331491_uff_E=631.59	-6.4	3.721	2.89
6M0JRDB_73331491_uff_E=631.59	-6.4	5.377	4.16
6M0JRDB_74426566_uff_E=467.72	-6.4	0	0
6M0JRDB_90958864_uff_E=541.66	-6.4	0	0
6M0JRDB_118254121_uff_E=637.58	-6.4	0	0
6M0JRDB_118254131_uff_E=612.52	-6.4	7.63	4.414
6M0JRDB_118254131_uff_E=612.52	-6.4	0	0
6M0JRDB_118263246_uff_E=636.92	-6.4	4.33	3.058
6M0JRDB_127053184_uff_E=568.68	-6.4	5.66	3.933
6M0JRDB_137652147_uff_E=534.82	-6.4	5.609	2.321
6M0JRDB_44139589_uff_E=599.15	-6.4	0	0
6M0JRDB_129895451_uff_E=502.94	-6.3	0	0
6M0JRDB_44139587_uff_E=1748.94	-6.3	0	0
6M0JRDB_46844022_uff_E=503.08	-6.3	5.516	2.243
6M0JRDB_73330763_uff_E=714.76	-6.3	4.879	2.828
6M0JRDB_73331208_uff_E=661.17	-6.3	14.268	12.722
6M0JRDB_73331347_uff_E=651.09	-6.3	6.662	3.225
6M0JRDB_73331348_uff_E=633.58	-6.3	7.425	4.336
6M0JRDB_73331349_uff_E=627.67	-6.3	3.291	2.598
6M0JRDB_73331488_uff_E=637.67	-6.3	2.433	1.812
6M0JRDB_74426566_uff_E=467.72	-6.3	1.748	1.443
6M0JRDB_118218025_uff_E=467.72	-6.3	0	0
6M0JRDB_118254179_uff_E=699.45	-6.3	4.996	2.642
6M0JRDB_118254214_uff_E=630.93	-6.3	14.093	12.529
6M0JRDB_118254232_uff_E=631.91	-6.3	7.641	4.694
6M0JRDB_44139586_uff_E=530.12	-6.3	5.363	2.304
6M0JRDB_137641183_uff_E=530.84	-6.3	0	0
6M0JRDB_25171632_uff_E=683.46	-6.3	0	0
6M0JRDB_25171635_uff_E=456.32	-6.3	6.026	1.726
6M0JRDB_46844137_uff_E=493.79	-6.3	0	0
6M0JRDB_25171633_uff_E=466.90	-6.3	5.596	2.577
6M0JRDB_121304016	-6.2	0	0
6M0JRDB_132286067_uff_E=605.32	-6.2	0	0
6M0JRDB_129895618_uff_E=499.93	-6.2	0	0
6M0JRDB_125429841_uff_E=499.93	-6.2	0	0
6M0JRDB_125429634_uff_E=502.94	-6.2	4.231	2.966
6M0JRDB_70876805_uff_E=498.65	-6.2	5.666	2.626
6M0JRDB_71318420_uff_E=519.02	-6.2	0	0
6M0JRDB_73330763_uff_E=714.76	-6.2	15.453	9.813
6M0JRDB_73330910_uff_E=648.69	-6.2	0	0
6M0JRDB_73331348_uff_E=633.58	-6.2	5.664	4.407
6M0JRDB_73331349_uff_E=627.67	-6.2	6.658	3.399
6M0JRDB_73331487_uff_E=640.93	-6.2	2.348	1.662
6M0JRDB_73331488_uff_E=637.67	-6.2	11.906	9.177
6M0JRDB_73331490_uff_E=626.42	-6.2	6.628	3.313
6M0JRDB_118218025_uff_E=467.72	-6.2	5.661	2.542
6M0JRDB_118254213_uff_E=644.51	-6.2	4.883	3.255
6M0JRDB_123293391_uff_E=636.92	-6.2	5.646	3.09
6M0JRDB_123704177_uff_E=624.00	-6.2	0	0
6M0JRDB_138490235_uff_E=829.78	-6.2	0	0
6M0JRDB_142550537_uff_E=823.03	-6.2	5.625	3.149
6M0JRDB_44139586_uff_E=530.12	-6.2	4.849	2.592
6M0JRDB_25171430_uff_E=1688.83	-6.2	0	0
6M0JRDB_25171635_uff_E=456.32	-6.2	3.022	2.443
6M0JRDB_25171635_uff_E=456.32	-6.2	6.439	2.512
6M0JRDB_25171635_uff_E=456.32	-6.2	2.424	1.857
6M0JRDB_25171849_uff_E=574.34	-6.2	5.99	3.574
6M0JRDB_44139589_uff_E=599.15	-6.2	15.093	12.712
6M0JRDB_44139589_uff_E=599.15	-6.2	15.999	13.358
6M0JRDB_44139589_uff_E=599.15	-6.2	2.577	2.013
6M0JRDB_44566031_uff_E=562.36	-6.2	6.122	2.756
6M0JRDB_44139468_uff_E=480.55	-6.2	0	0
6M0JRDB_44139588_uff_E=509.86	-6.2	1.687	1.385
6M0JRDB_44139588_uff_E=509.86	-6.2	5.949	2.526
6M0JRDB_46844137_uff_E=493.79	-6.2	1.246	0.931
6M0JRDB_121304016	-6.1	1.517	1.284
6M0JRDB_134126307_uff_E=430.18	-6.1	0	0
6M0JRDB_132286457_uff_E=528.62	-6.1	0	0
6M0JRDB_129895451_uff_E=502.94	-6.1	4.29	2.903
6M0JRDB_125429498_uff_E=568.24	-6.1	0	0
6M0JRDB_98125635_uff_E=587.84	-6.1	0	0
6M0JRDB_25171429_uff_E=423.15	-6.1	0	0
6M0JRDB_25171637_uff_E=456.94	-6.1	5.64	2.869
6M0JRDB_56950846_uff_E=485.31	-6.1	14.038	9.949
6M0JRDB_70876805_uff_E=498.65	-6.1	5.459	3.087
6M0JRDB_70876805_uff_E=498.65	-6.1	3.063	2.115
6M0JRDB_71043635_uff_E=1668.80	-6.1	0	0
6M0JRDB_71318420_uff_E=519.02	-6.1	4.886	2.956
6M0JRDB_73330625_uff_E=631.30	-6.1	13.523	11.974
6M0JRDB_73330763_uff_E=714.76	-6.1	14.562	9.541
6M0JRDB_73330766_uff_E=651.99	-6.1	8.048	2.866
6M0JRDB_73330766_uff_E=651.99	-6.1	0	0
6M0JRDB_73330910_uff_E=648.69	-6.1	12.15	8.813
6M0JRDB_73331345_uff_E=668.75	-6.1	6.143	2.909
6M0JRDB_73331487_uff_E=640.93	-6.1	13.075	9.922
6M0JRDB_73331490_uff_E=626.42	-6.1	2.985	2.334
6M0JRDB_73331628_uff_E=624.00	-6.1	0	0
6M0JRDB_74426566_uff_E=467.72	-6.1	6.015	2.578
6M0JRDB_75218864_uff_E=499.12	-6.1	12.519	10.223
6M0JRDB_75218864_uff_E=499.12	-6.1	0	0
6M0JRDB_90958864_uff_E=541.66	-6.1	6.216	2.384
6M0JRDB_118254083_uff_E=620.90	-6.1	9.165	5.775
6M0JRDB_118254083_uff_E=620.90	-6.1	5.297	3.721
6M0JRDB_118254151_uff_E=635.34	-6.1	0	0
6M0JRDB_118254219_uff_E=599.83	-6.1	0	0
6M0JRDB_118263246_uff_E=636.92	-6.1	5.524	3.232
6M0JRDB_118263247_uff_E=624.00	-6.1	0	0
6M0JRDB_123293391_uff_E=636.92	-6.1	4.606	3.146
6M0JRDB_137467367_uff_E=372.94	-6.1	0	0
6M0JRDB_44139586_uff_E=530.12	-6.1	2.812	1.874
6M0JRDB_57393956_uff_E=482.31	-6.1	0	0
6M0JRDB_127053184_uff_E=568.68	-6.1	5.81	3.641
6M0JRDB_127053185_uff_E=417.22	-6.1	6.502	3.973
6M0JRDB_44566031_uff_E=562.36	-6.1	1.772	1.567
6M0JRDB_46843964_uff_E=523.87	-6.1	0	0
6M0JRDB_25172057_uff_E=459.89	-6.1	5.631	2.82
6M0JRDB_132286457_uff_E=528.62	-6	12.329	8.629
6M0JRDB_132286322_uff_E=531.16	-6	0	0
6M0JRDB_129895481_uff_E=567.88	-6	0	0
6M0JRDB_125429498_uff_E=568.24	-6	5.53	2.636
6M0JRDB_125429497_uff_E=567.88	-6	0	0
6M0JRDB_125428750_uff_E=537.29	-6	0	0
6M0JRDB_101749852_uff_E=396.61	-6	0	0
6M0JRDB_101592379_uff_E=353.83	-6	0	0
6M0JRDB_73053256_uff_E=792.96	-6	10.709	8.806
6M0JRDB_73053256_uff_E=792.96	-6	0	0
6M0JRDB_25171429_uff_E=423.15	-6	1.521	1.31
6M0JRDB_23424320_uff_E=445.80	-6	0	0
6M0JRDB_14760418_uff_E=350.88	-6	0	0
6M0JRDB_10668598_uff_E=474.70	-6	0	0
6M0JRDB_586839_uff_E=882.59	-6	2.605	2.117
6M0JRDB_586839_uff_E=882.59	-6	0	0
6M0JRDB_13735050_uff_E=749.67	-6	0	0
6M0JRDB_25171637_uff_E=456.94	-6	2.234	2.147
6M0JRDB_44566075_uff_E=523.32	-6	7.778	4.625
6M0JRDB_46844023_uff_E=474.74	-6	0	0
6M0JRDB_56950846_uff_E=485.31	-6	8.84	5.397
6M0JRDB_56950846_uff_E=485.31	-6	2.344	1.82
6M0JRDB_71318422_uff_E=595.64	-6	0	0
6M0JRDB_73330763_uff_E=714.76	-6	16.462	13.245
6M0JRDB_73330763_uff_E=714.76	-6	4.223	2.401
6M0JRDB_73330763_uff_E=714.76	-6	8.894	5.26
6M0JRDB_73330764_uff_E=710.57	-6	5.328	3.173
6M0JRDB_73330766_uff_E=651.99	-6	14.483	11.203
6M0JRDB_73331060_uff_E=634.29	-6	6.633	2.984
6M0JRDB_73331060_uff_E=634.29	-6	0	0
6M0JRDB_73331205_uff_E=629.44	-6	0	0
6M0JRDB_73331209_uff_E=661.60	-6	0	0
6M0JRDB_73331346_uff_E=611.27	-6	10.922	8.729
6M0JRDB_73331349_uff_E=627.67	-6	11.285	8.077
6M0JRDB_73331491_uff_E=631.59	-6	7.532	4.369
6M0JRDB_75218825_uff_E=478.84	-6	12.041	9.605
6M0JRDB_118254103_uff_E=631.96	-6	0	0
6M0JRDB_118254121_uff_E=637.58	-6	7.327	4.391
6M0JRDB_118254121_uff_E=637.58	-6	5.213	3.803
6M0JRDB_118254121_uff_E=637.58	-6	1.776	1.385
6M0JRDB_118254214_uff_E=630.93	-6	15.134	13.012
6M0JRDB_118254232_uff_E=631.91	-6	9.613	6.877
6M0JRDB_118254232_uff_E=631.91	-6	7.173	4.041
6M0JRDB_118254246_uff_E=635.83	-6	0	0
6M0JRDB_131975182_uff_E=561.17	-6	0	0
6M0JRDB_137467381_uff_E=489.66	-6	0	0
6M0JRDB_148240297_uff_E=338.09	-6	3.959	2.521
6M0JRDB_148240297_uff_E=338.09	-6	0	0
6M0JRDB_44139586_uff_E=530.12	-6	5.653	2.358
6M0JRDB_56950845_uff_E=553.08	-6	0	0
6M0JRDB_127053184_uff_E=568.68	-6	12.515	10.259
6M0JRDB_127053185_uff_E=417.22	-6	12.667	10.602
6M0JRDB_127053185_uff_E=417.22	-6	6.559	4.112
6M0JRDB_137641183_uff_E=530.84	-6	4.2	2.639
6M0JRDB_137652147_uff_E=534.82	-6	5.045	2.859
6M0JRDB_25171635_uff_E=456.32	-6	6.143	2.75
6M0JRDB_44139589_uff_E=599.15	-6	15.028	11.321
6M0JRDB_44139589_uff_E=599.15	-6	14.609	10.568
6M0JRDB_25172057_uff_E=459.89	-6	5.516	3.05
6M0JRDB_25171633_uff_E=466.90	-6	2.076	1.538
6M0JRDB_121304016	-5.9	7.031	3.648
6M0JRDB_132286397_uff_E=602.85	-5.9	14.751	9.633
6M0JRDB_132285949_uff_E=530.49	-5.9	0	0
6M0JRDB_129895205_uff_E=525.50	-5.9	0	0
6M0JRDB_125429840_uff_E=506.48	-5.9	0	0
6M0JRDB_125429633_uff_E=507.88	-5.9	3.823	1.625
6M0JRDB_125429633_uff_E=507.88	-5.9	10.705	7.852
6M0JRDB_125427757_uff_E=524.66	-5.9	5.521	2.721
6M0JRDB_125427757_uff_E=524.66	-5.9	0	0
6M0JRDB_76973167_uff_E=599.22	-5.9	0	0
6M0JRDB_73331772_uff_E=586.44	-5.9	13.851	11.856
6M0JRDB_25171429_uff_E=423.15	-5.9	6.132	2.591
6M0JRDB_23424319_uff_E=490.69	-5.9	0	0
6M0JRDB_10787978_uff_E=533.30	-5.9	0	0
6M0JRDB_14737140_uff_E=464.56	-5.9	2.059	1.612
6M0JRDB_14737140_uff_E=464.56	-5.9	0	0
6M0JRDB_73331209_uff_E=661.60	-5.9	8.321	3.87
6M0JRDB_73331209_uff_E=661.60	-5.9	15.055	10.543
6M0JRDB_73331345_uff_E=668.75	-5.9	11.348	8.735
6M0JRDB_73331345_uff_E=668.75	-5.9	5.921	3.708
6M0JRDB_73331345_uff_E=668.75	-5.9	12.205	10.19
6M0JRDB_73331345_uff_E=668.75	-5.9	11.268	8.143
6M0JRDB_73331346_uff_E=611.27	-5.9	5.167	3.036
6M0JRDB_73331347_uff_E=651.09	-5.9	11.393	8.089
6M0JRDB_73331348_uff_E=633.58	-5.9	9.361	6.665
6M0JRDB_73331348_uff_E=633.58	-5.9	2.453	1.939
6M0JRDB_73331348_uff_E=633.58	-5.9	8.5	4.909
6M0JRDB_73331487_uff_E=640.93	-5.9	14.594	12.094
6M0JRDB_73331488_uff_E=637.67	-5.9	9.661	5.959
6M0JRDB_73331490_uff_E=626.42	-5.9	11.314	7.995
6M0JRDB_90958864_uff_E=541.66	-5.9	12.103	9.332
6M0JRDB_90958864_uff_E=541.66	-5.9	5.578	2.212
6M0JRDB_90958864_uff_E=541.66	-5.9	5.601	2.196
6M0JRDB_91564943_uff_E=503.49	-5.9	0	0
6M0JRDB_118218025_uff_E=467.72	-5.9	2.378	1.779
6M0JRDB_118254142_uff_E=558.28	-5.9	7.27	2.515
6M0JRDB_118254142_uff_E=558.28	-5.9	12.469	11.006
6M0JRDB_118254145_uff_E=558.28	-5.9	7.267	2.505
6M0JRDB_118254145_uff_E=558.28	-5.9	12.458	10.993
6M0JRDB_118254151_uff_E=635.34	-5.9	15.131	12.819
6M0JRDB_118254179_uff_E=699.45	-5.9	12.431	9.351
6M0JRDB_118254214_uff_E=630.93	-5.9	3.759	2.619
6M0JRDB_118254216_uff_E=633.63	-5.9	0	0
6M0JRDB_118254232_uff_E=631.91	-5.9	8.535	4.873
6M0JRDB_118263241_uff_E=578.46	-5.9	0	0
6M0JRDB_118263246_uff_E=636.92	-5.9	3.522	2.747
6M0JRDB_118267097_uff_E=473.76	-5.9	0	0
6M0JRDB_131964492_uff_E=498.10	-5.9	0	0
6M0JRDB_131975182_uff_E=561.17	-5.9	10.398	8.843
6M0JRDB_137467447_uff_E=315.96	-5.9	0	0
6M0JRDB_142550537_uff_E=823.03	-5.9	3.891	2.247
6M0JRDB_144564145_uff_E=652.83	-5.9	0	0
6M0JRDB_127053184_uff_E=568.68	-5.9	13.231	10.658
6M0JRDB_137641183_uff_E=530.84	-5.9	5.184	2.701
6M0JRDB_137641183_uff_E=530.84	-5.9	5.416	3.276
6M0JRDB_25171426_uff_E=435.36	-5.9	0	0
6M0JRDB_25171635_uff_E=456.32	-5.9	2.832	2.206
6M0JRDB_25171849_uff_E=574.34	-5.9	4.481	3.029
6M0JRDB_25171849_uff_E=574.34	-5.9	13.651	10.915
6M0JRDB_44139589_uff_E=599.15	-5.9	21.408	18.425
6M0JRDB_44139589_uff_E=599.15	-5.9	8.639	4.161
6M0JRDB_44139589_uff_E=599.15	-5.9	15.318	12.827
6M0JRDB_56950704_uff_E=442.06	-5.9	0	0
6M0JRDB_25172057_uff_E=459.89	-5.9	2.37	1.674
6M0JRDB_25172057_uff_E=459.89	-5.9	3.291	2.466
6M0JRDB_44139588_uff_E=509.86	-5.9	5.091	2.914
6M0JRDB_44139588_uff_E=509.86	-5.9	5.623	2.442
6M0JRDB_132286496_uff_E=560.09	-5.8	0	0
6M0JRDB_132286397_uff_E=602.85	-5.8	13.871	9.485
6M0JRDB_132286397_uff_E=602.85	-5.8	15.151	10.495
6M0JRDB_129895618_uff_E=499.93	-5.8	6.546	4.272
6M0JRDB_129895618_uff_E=499.93	-5.8	4.623	3.143
6M0JRDB_129895481_uff_E=567.88	-5.8	12.692	10.339
6M0JRDB_129603773_uff_E=563.30	-5.8	0	0
6M0JRDB_125429841_uff_E=499.93	-5.8	4.569	2.864
6M0JRDB_125429633_uff_E=507.88	-5.8	6.862	3.947
6M0JRDB_125429497_uff_E=567.88	-5.8	12.68	10.217
6M0JRDB_125429426_uff_E=525.50	-5.8	0	0
6M0JRDB_101749852_uff_E=396.61	-5.8	5.89	2.594
6M0JRDB_72726987_uff_E=607.92	-5.8	11.261	6.497
6M0JRDB_72726987_uff_E=607.92	-5.8	0	0
6M0JRDB_23424318_uff_E=443.60	-5.8	0	0
6M0JRDB_586839_uff_E=882.59	-5.8	5.786	1.861
6M0JRDB_14737140_uff_E=464.56	-5.8	6.031	2.652
6M0JRDB_68024713_uff_E=427.25	-5.8	0	0
6M0JRDB_71318420_uff_E=519.02	-5.8	1.213	1.181
6M0JRDB_73330625_uff_E=631.30	-5.8	15.999	12.91
6M0JRDB_73330625_uff_E=631.30	-5.8	14.303	12.368
6M0JRDB_73330763_uff_E=714.76	-5.8	7.963	5.678
6M0JRDB_73330763_uff_E=714.76	-5.8	5.861	3.461
6M0JRDB_73331060_uff_E=634.29	-5.8	6.69	3.659
6M0JRDB_73331205_uff_E=629.44	-5.8	11.902	9.384
6M0JRDB_73331208_uff_E=661.17	-5.8	3.837	2.801
6M0JRDB_73331208_uff_E=661.17	-5.8	16.443	13.972
6M0JRDB_73331208_uff_E=661.17	-5.8	14.969	10.418
6M0JRDB_73331208_uff_E=661.17	-5.8	6.371	4.499
6M0JRDB_73331487_uff_E=640.93	-5.8	12.683	8.984
6M0JRDB_73331487_uff_E=640.93	-5.8	13.073	8.924
6M0JRDB_73331491_uff_E=631.59	-5.8	8.623	4.776
6M0JRDB_73331628_uff_E=624.00	-5.8	4.858	3.317
6M0JRDB_75218825_uff_E=478.84	-5.8	11.714	9.618
6M0JRDB_90958864_uff_E=541.66	-5.8	1.699	1.468
6M0JRDB_118254142_uff_E=558.28	-5.8	12.9	9.905
6M0JRDB_118254145_uff_E=558.28	-5.8	12.849	9.887
6M0JRDB_118254151_uff_E=635.34	-5.8	14.617	12.906
6M0JRDB_118254179_uff_E=699.45	-5.8	4.424	2.392
6M0JRDB_118254182_uff_E=641.96	-5.8	0	0
6M0JRDB_118254214_uff_E=630.93	-5.8	16.842	14.487
6M0JRDB_118254216_uff_E=633.63	-5.8	17.375	15.054
6M0JRDB_118254246_uff_E=635.83	-5.8	10.601	6.921
6M0JRDB_118263237_uff_E=588.21	-5.8	0	0
6M0JRDB_118263244_uff_E=641.96	-5.8	0	0
6M0JRDB_118263247_uff_E=624.00	-5.8	5.16	3.404
6M0JRDB_123704177_uff_E=624.00	-5.8	4.7	3.311
6M0JRDB_123836216_uff_E=631.96	-5.8	0	0
6M0JRDB_131975182_uff_E=561.17	-5.8	2.069	1.742
6M0JRDB_131975184_uff_E=547.56	-5.8	0	0
6M0JRDB_137467381_uff_E=489.66	-5.8	6.878	3.592
6M0JRDB_137467524_uff_E=386.34	-5.8	0	0
6M0JRDB_138490235_uff_E=829.78	-5.8	5.624	3.705
6M0JRDB_138490235_uff_E=829.78	-5.8	3.476	1.733
6M0JRDB_138514334_uff_E=388.58	-5.8	0	0
6M0JRDB_138514336_uff_E=331.78	-5.8	0	0
6M0JRDB_144564153_uff_E=641.96	-5.8	0	0
6M0JRDB_147116578_uff_E=520.21	-5.8	5.163	2.719
6M0JRDB_148240297_uff_E=338.09	-5.8	4.865	4.033
6M0JRDB_127053184_uff_E=568.68	-5.8	4.829	2.418
6M0JRDB_127053184_uff_E=568.68	-5.8	11.498	10.376
6M0JRDB_6452395_uff_E=485.14	-5.8	0	0
6M0JRDB_25171428_uff_E=435.54	-5.8	0	0
6M0JRDB_46843964_uff_E=523.87	-5.8	5.095	2.425
6M0JRDB_56950843_uff_E=482.15	-5.8	0	0
6M0JRDB_44139468_uff_E=480.55	-5.8	13.01	10.687
6M0JRDB_44139468_uff_E=480.55	-5.8	13.04	10.729
6M0JRDB_46844024_uff_E=467.06	-5.8	12.978	10.645
6M0JRDB_46844137_uff_E=493.79	-5.8	13.582	11.653
6M0JRDB_121304016	-5.7	8.331	3.101
6M0JRDB_144564119_uff_E=511.99	-5.7	0	0
6M0JRDB_134126306_uff_E=422.13	-5.7	0	0
6M0JRDB_132286067_uff_E=605.32	-5.7	15.12	11.864
6M0JRDB_129895618_uff_E=499.93	-5.7	5.371	3.34
6M0JRDB_129895443_uff_E=507.32	-5.7	0	0
6M0JRDB_129895087_uff_E=526.27	-5.7	0	0
6M0JRDB_125429841_uff_E=499.93	-5.7	6.301	4.208
6M0JRDB_125429633_uff_E=507.88	-5.7	10.549	7.661
6M0JRDB_125429498_uff_E=568.24	-5.7	13.576	9.63
6M0JRDB_125429498_uff_E=568.24	-5.7	14.215	11.119
6M0JRDB_125429498_uff_E=568.24	-5.7	14.27	10.236
6M0JRDB_125429498_uff_E=568.24	-5.7	7.447	3.938
6M0JRDB_125429427_uff_E=542.77	-5.7	0	0
6M0JRDB_125429426_uff_E=525.50	-5.7	13.393	10.871
6M0JRDB_125429177_uff_E=507.62	-5.7	0	0
6M0JRDB_125429126_uff_E=510.78	-5.7	0	0
6M0JRDB_125428750_uff_E=537.29	-5.7	5.827	3.161
6M0JRDB_125428703_uff_E=526.27	-5.7	0	0
6M0JRDB_125428702_uff_E=552.27	-5.7	1.832	1.145
6M0JRDB_125428702_uff_E=552.27	-5.7	0	0
6M0JRDB_122400007_uff_E=563.29	-5.7	0	0
6M0JRDB_95988135_uff_E=481.81	-5.7	0	0
6M0JRDB_85199072_uff_E=427.63	-5.7	0	0
6M0JRDB_23424433_uff_E=500.83	-5.7	0	0
6M0JRDB_23424321_uff_E=494.61	-5.7	0	0
6M0JRDB_10715802_uff_E=497.31	-5.7	0	0
6M0JRDB_10623284_uff_E=545.80	-5.7	0	0
6M0JRDB_13735050_uff_E=749.67	-5.7	15.111	10.37
6M0JRDB_14737140_uff_E=464.56	-5.7	3.58	3.101
6M0JRDB_14737140_uff_E=464.56	-5.7	2.394	2.009
6M0JRDB_44566075_uff_E=523.32	-5.7	7.743	2.858
6M0JRDB_44566075_uff_E=523.32	-5.7	13.022	10.235
6M0JRDB_46844022_uff_E=503.08	-5.7	12.585	10.5
6M0JRDB_57390407_uff_E=486.36	-5.7	0	0
6M0JRDB_70658189_uff_E=385.06	-5.7	0	0
6M0JRDB_71043635_uff_E=1668.80	-5.7	6.415	2.977
6M0JRDB_71318420_uff_E=519.02	-5.7	5.181	4.064
6M0JRDB_73330764_uff_E=710.57	-5.7	9.058	4.787
6M0JRDB_73330766_uff_E=651.99	-5.7	9.234	3.689
6M0JRDB_73330910_uff_E=648.69	-5.7	12.48	8.744
6M0JRDB_73330911_uff_E=636.92	-5.7	6.891	3.728
6M0JRDB_73330912_uff_E=647.29	-5.7	0	0
6M0JRDB_73331060_uff_E=634.29	-5.7	7.302	4.295
6M0JRDB_73331209_uff_E=661.60	-5.7	8.298	4.307
6M0JRDB_73331344_uff_E=637.78	-5.7	0	0
6M0JRDB_73331349_uff_E=627.67	-5.7	5.036	3.776
6M0JRDB_73331488_uff_E=637.67	-5.7	4.495	3.3
6M0JRDB_73331488_uff_E=637.67	-5.7	13.067	9.229
6M0JRDB_73331490_uff_E=626.42	-5.7	4.258	3.056
6M0JRDB_73331491_uff_E=631.59	-5.7	9.538	6.733
6M0JRDB_74426566_uff_E=467.72	-5.7	5.765	3.164
6M0JRDB_75218824_uff_E=483.43	-5.7	0	0
6M0JRDB_75218825_uff_E=478.84	-5.7	4.795	2.604
6M0JRDB_90958864_uff_E=541.66	-5.7	3.304	2.34
6M0JRDB_90958864_uff_E=541.66	-5.7	12.324	9.182
6M0JRDB_91035900_uff_E=505.87	-5.7	0	0
6M0JRDB_91564943_uff_E=503.49	-5.7	12.643	10.594
6M0JRDB_91564943_uff_E=503.49	-5.7	12.967	9.452
6M0JRDB_118254103_uff_E=631.96	-5.7	11.537	8.785
6M0JRDB_118254142_uff_E=558.28	-5.7	6.473	3.471
6M0JRDB_118254145_uff_E=558.28	-5.7	6.535	3.49
6M0JRDB_118254151_uff_E=635.34	-5.7	14.163	12.829
6M0JRDB_118254151_uff_E=635.34	-5.7	15.833	11.155
6M0JRDB_118254179_uff_E=699.45	-5.7	13	10.382
6M0JRDB_118254213_uff_E=644.51	-5.7	9.057	5.172
6M0JRDB_118254214_uff_E=630.93	-5.7	6.179	4.338
6M0JRDB_118254214_uff_E=630.93	-5.7	10.33	7.843
6M0JRDB_118254216_uff_E=633.63	-5.7	10.224	7.307
6M0JRDB_118254216_uff_E=633.63	-5.7	8.398	5.611
6M0JRDB_118263228_uff_E=472.25	-5.7	0	0
6M0JRDB_118263237_uff_E=588.21	-5.7	12.973	10.016
6M0JRDB_118263245_uff_E=614.68	-5.7	0	0
6M0JRDB_118263246_uff_E=636.92	-5.7	10.858	7.196
6M0JRDB_123836216_uff_E=631.96	-5.7	11.586	8.841
6M0JRDB_131964506_uff_E=573.49	-5.7	3.685	2.822
6M0JRDB_131964506_uff_E=573.49	-5.7	0	0
6M0JRDB_138514463_uff_E=391.15	-5.7	0	0
6M0JRDB_142550538_uff_E=347.64	-5.7	0	0
6M0JRDB_147116578_uff_E=520.21	-5.7	6.469	2.46
6M0JRDB_44139586_uff_E=530.12	-5.7	12.994	10.948
6M0JRDB_44139590_uff_E=680.31	-5.7	0	0
6M0JRDB_56924747_uff_E=515.53	-5.7	0	0
6M0JRDB_56950845_uff_E=553.08	-5.7	9.969	5.915
6M0JRDB_137641183_uff_E=530.84	-5.7	5.968	2.55
6M0JRDB_25171430_uff_E=1688.83	-5.7	6.53	3.1
6M0JRDB_25171849_uff_E=574.34	-5.7	13.686	10.929
6M0JRDB_46843964_uff_E=523.87	-5.7	13.578	10.827
6M0JRDB_46843964_uff_E=523.87	-5.7	6.034	3.847
6M0JRDB_56950842_uff_E=522.07	-5.7	0	0
6M0JRDB_44139588_uff_E=509.86	-5.7	5.544	2.143
6M0JRDB_46844024_uff_E=467.06	-5.7	2.723	2.306
6M0JRDB_46844024_uff_E=467.06	-5.7	12.39	9.811
6M0JRDB_46844137_uff_E=493.79	-5.7	12.99	10.808
6M0JRDB_46844137_uff_E=493.79	-5.7	3.721	2.123
6M0JRDB_46844137_uff_E=493.79	-5.7	12.916	10.587
6M0JRDB_46844137_uff_E=493.79	-5.7	13.023	10.839
6M0JRDB_25171633_uff_E=466.90	-5.7	12.745	10.592
6M0JRDB_121304016	-5.6	9.162	4.826
6M0JRDB_133688441_uff_E=267.44	-5.6	0	0
6M0JRDB_132286397_uff_E=602.85	-5.6	13.028	8.404
6M0JRDB_132286322_uff_E=531.16	-5.6	12.645	8.605
6M0JRDB_132286165_uff_E=526.02	-5.6	0	0
6M0JRDB_132285949_uff_E=530.49	-5.6	12.506	8.384
6M0JRDB_129895618_uff_E=499.93	-5.6	10.6	8.168
6M0JRDB_129895481_uff_E=567.88	-5.6	9.48	4.75
6M0JRDB_129895451_uff_E=502.94	-5.6	5.862	3.289
6M0JRDB_129895222_uff_E=505.08	-5.6	13.714	10.068
6M0JRDB_129895222_uff_E=505.08	-5.6	0	0
6M0JRDB_129895205_uff_E=525.50	-5.6	13.406	10.891
6M0JRDB_129895176_uff_E=504.54	-5.6	5.112	3.109
6M0JRDB_129895176_uff_E=504.54	-5.6	4.968	3.234
6M0JRDB_129895176_uff_E=504.54	-5.6	0	0
6M0JRDB_129895030_uff_E=475.88	-5.6	0	0
6M0JRDB_129894893_uff_E=493.62	-5.6	0	0
6M0JRDB_125429841_uff_E=499.93	-5.6	10.77	8.37
6M0JRDB_125429840_uff_E=506.48	-5.6	6.535	4.012
6M0JRDB_125429634_uff_E=502.94	-5.6	11.346	8.894
6M0JRDB_125429634_uff_E=502.94	-5.6	5.765	3.194
6M0JRDB_125429633_uff_E=507.88	-5.6	10.931	7.578
6M0JRDB_125429498_uff_E=568.24	-5.6	12.383	9.52
6M0JRDB_125429498_uff_E=568.24	-5.6	14.862	10.542
6M0JRDB_125429420_uff_E=541.67	-5.6	0	0
6M0JRDB_125429178_uff_E=504.54	-5.6	0	0
6M0JRDB_125429177_uff_E=507.62	-5.6	5.872	2.987
6M0JRDB_125428749_uff_E=493.62	-5.6	0	0
6M0JRDB_125428702_uff_E=552.27	-5.6	5.616	2.865
6M0JRDB_125428416_uff_E=475.88	-5.6	0	0
6M0JRDB_122400012_uff_E=584.80	-5.6	0	0
6M0JRDB_101749852_uff_E=396.61	-5.6	5.47	2.094
6M0JRDB_101592379_uff_E=353.83	-5.6	3.315	2.011
6M0JRDB_95988136_uff_E=478.36	-5.6	11.617	9.051
6M0JRDB_95988136_uff_E=478.36	-5.6	0	0
6M0JRDB_95988134_uff_E=482.23	-5.6	0	0
6M0JRDB_95988133_uff_E=478.45	-5.6	0	0
6M0JRDB_76970921_uff_E=483.51	-5.6	0	0
6M0JRDB_56691266_uff_E=482.23	-5.6	0	0
6M0JRDB_23424320_uff_E=445.80	-5.6	1.742	1.493
6M0JRDB_23424082_uff_E=486.48	-5.6	0	0
6M0JRDB_14760418_uff_E=350.88	-5.6	3.509	2.236
6M0JRDB_10693960_uff_E=552.84	-5.6	0	0
6M0JRDB_10691458_uff_E=474.28	-5.6	0	0
6M0JRDB_10596108_uff_E=425.76	-5.6	0	0
6M0JRDB_10574693_uff_E=486.37	-5.6	0	0
6M0JRDB_620374_uff_E=372.95	-5.6	0	0
6M0JRDB_13735050_uff_E=749.67	-5.6	5.615	2.699
6M0JRDB_44139587_uff_E=1748.94	-5.6	3.065	2.115
6M0JRDB_46844022_uff_E=503.08	-5.6	12.429	10.101
6M0JRDB_46844083_uff_E=525.07	-5.6	0	0
6M0JRDB_56950846_uff_E=485.31	-5.6	15.378	13.083
6M0JRDB_68727702_uff_E=407.12	-5.6	0	0
6M0JRDB_70870984_uff_E=487.13	-5.6	6.158	3.716
6M0JRDB_70870984_uff_E=487.13	-5.6	13.263	10.823
6M0JRDB_70876805_uff_E=498.65	-5.6	11.469	9.169
6M0JRDB_70876805_uff_E=498.65	-5.6	12.978	10.752
6M0JRDB_71318422_uff_E=595.64	-5.6	5.06	3.15
6M0JRDB_71318422_uff_E=595.64	-5.6	3.219	2.366
6M0JRDB_71737790_uff_E=419.80	-5.6	0	0
6M0JRDB_73330625_uff_E=631.30	-5.6	2.391	2.141
6M0JRDB_73330764_uff_E=710.57	-5.6	11.114	7.387
6M0JRDB_73330911_uff_E=636.92	-5.6	10.837	6.781
6M0JRDB_73331205_uff_E=629.44	-5.6	9.587	5.436
6M0JRDB_73331209_uff_E=661.60	-5.6	13.525	9.262
6M0JRDB_73331209_uff_E=661.60	-5.6	8.846	3.711
6M0JRDB_73331344_uff_E=637.78	-5.6	13.85	10.763
6M0JRDB_73331344_uff_E=637.78	-5.6	10.378	7.512
6M0JRDB_73331344_uff_E=637.78	-5.6	2.353	1.747
6M0JRDB_73331348_uff_E=633.58	-5.6	5.622	4.192
6M0JRDB_73331348_uff_E=633.58	-5.6	10.361	7.782
6M0JRDB_74426566_uff_E=467.72	-5.6	2.438	1.798
6M0JRDB_74426566_uff_E=467.72	-5.6	3.647	2.715
6M0JRDB_75218824_uff_E=483.43	-5.6	12.997	10.483
6M0JRDB_75218864_uff_E=499.12	-5.6	4.074	2.969
6M0JRDB_90958864_uff_E=541.66	-5.6	13.277	10.407
6M0JRDB_91564943_uff_E=503.49	-5.6	2.96	2.24
6M0JRDB_118218025_uff_E=467.72	-5.6	5.188	2.749
6M0JRDB_118254083_uff_E=620.90	-5.6	2.504	1.899
6M0JRDB_118254121_uff_E=637.58	-5.6	9.693	6.85
6M0JRDB_118254121_uff_E=637.58	-5.6	2.665	2.018
6M0JRDB_118254131_uff_E=612.52	-5.6	15.085	11.569
6M0JRDB_118254151_uff_E=635.34	-5.6	11.333	9.513
6M0JRDB_118254151_uff_E=635.34	-5.6	8.471	4.544
6M0JRDB_118254151_uff_E=635.34	-5.6	13.776	9.698
6M0JRDB_118254179_uff_E=699.45	-5.6	11.51	9.416
6M0JRDB_118254190_uff_E=511.99	-5.6	0	0
6M0JRDB_118254232_uff_E=631.91	-5.6	6.635	4.569
6M0JRDB_118254232_uff_E=631.91	-5.6	10.416	7.969
6M0JRDB_118254246_uff_E=635.83	-5.6	5.082	3.249
6M0JRDB_118263231_uff_E=574.80	-5.6	0	0
6M0JRDB_118263237_uff_E=588.21	-5.6	7.2	2.264
6M0JRDB_118263241_uff_E=578.46	-5.6	11.386	9.163
6M0JRDB_118263246_uff_E=636.92	-5.6	10.604	8.033
6M0JRDB_118263246_uff_E=636.92	-5.6	9.225	5.466
6M0JRDB_118263246_uff_E=636.92	-5.6	10.652	6.331
6M0JRDB_118263246_uff_E=636.92	-5.6	9.109	5.42
6M0JRDB_118267073_uff_E=557.12	-5.6	0	0
6M0JRDB_123282608_uff_E=523.14	-5.6	0	0
6M0JRDB_123293391_uff_E=636.92	-5.6	2.104	1.591
6M0JRDB_123293391_uff_E=636.92	-5.6	10.814	7.113
6M0JRDB_131964492_uff_E=498.10	-5.6	4.663	2.479
6M0JRDB_131964506_uff_E=573.49	-5.6	7.312	2.856
6M0JRDB_131964506_uff_E=573.49	-5.6	12.671	9.87
6M0JRDB_131975184_uff_E=547.56	-5.6	3.814	2.632
6M0JRDB_131975184_uff_E=547.56	-5.6	11.693	9.493
6M0JRDB_135027778_uff_E=580.27	-5.6	0	0
6M0JRDB_138496616_uff_E=483.72	-5.6	0	0
6M0JRDB_138514336_uff_E=331.78	-5.6	5.534	2.385
6M0JRDB_147116578_uff_E=520.21	-5.6	7.42	3.853
6M0JRDB_147116578_uff_E=520.21	-5.6	13.128	9.842
6M0JRDB_153989287_uff_E=412.33	-5.6	0	0
6M0JRDB_44139586_uff_E=530.12	-5.6	5.407	2.34
6M0JRDB_44139586_uff_E=530.12	-5.6	12.944	10.37
6M0JRDB_44139586_uff_E=530.12	-5.6	13.242	10.673
6M0JRDB_56950845_uff_E=553.08	-5.6	10.008	7.95
6M0JRDB_56950845_uff_E=553.08	-5.6	3.615	2.541
6M0JRDB_56950845_uff_E=553.08	-5.6	2.012	1.13
6M0JRDB_57393956_uff_E=482.31	-5.6	3.446	2.279
6M0JRDB_137641183_uff_E=530.84	-5.6	3.241	2.075
6M0JRDB_25171427_uff_E=451.54	-5.6	0	0
6M0JRDB_44565974_uff_E=433.18	-5.6	0	0
6M0JRDB_46843964_uff_E=523.87	-5.6	12.608	9.212
6M0JRDB_46843964_uff_E=523.87	-5.6	4.922	2.063
6M0JRDB_25172057_uff_E=459.89	-5.6	13.337	11.239
6M0JRDB_44139588_uff_E=509.86	-5.6	7.155	4.021
6M0JRDB_46844024_uff_E=467.06	-5.6	3.193	2.439
6M0JRDB_46844137_uff_E=493.79	-5.6	12.608	9.453
6M0JRDB_46844137_uff_E=493.79	-5.6	8.065	4.791
6M0JRDB_25171633_uff_E=466.90	-5.6	5.109	2.171
6M0JRDB_25171633_uff_E=466.90	-5.6	12.457	10.208
6M0JRDB_121304016	-5.5	3.068	1.938
6M0JRDB_121304016	-5.5	10.837	6.341
6M0JRDB_144564119_uff_E=511.99	-5.5	6.852	3.273
6M0JRDB_133688441_uff_E=267.44	-5.5	6.456	2.348
6M0JRDB_132286457_uff_E=528.62	-5.5	13.78	10.265
6M0JRDB_132286397_uff_E=602.85	-5.5	11.096	7.842
6M0JRDB_132286359_uff_E=505.08	-5.5	0	0
6M0JRDB_132286165_uff_E=526.02	-5.5	15.888	9.373
6M0JRDB_132286090_uff_E=475.88	-5.5	0	0
6M0JRDB_132286067_uff_E=605.32	-5.5	13.035	8.177
6M0JRDB_132285940_uff_E=519.13	-5.5	13.649	9.909
6M0JRDB_132285940_uff_E=519.13	-5.5	0	0
6M0JRDB_129895451_uff_E=502.94	-5.5	11.111	8.388
6M0JRDB_129895222_uff_E=505.08	-5.5	10.747	7.302
6M0JRDB_129895176_uff_E=504.54	-5.5	10.945	8.472
6M0JRDB_129895176_uff_E=504.54	-5.5	6.313	3.375
6M0JRDB_129895087_uff_E=526.27	-5.5	13.343	10.749
6M0JRDB_129894893_uff_E=493.62	-5.5	11.317	7.531
6M0JRDB_129603773_uff_E=563.30	-5.5	4.922	2.84
6M0JRDB_129603773_uff_E=563.30	-5.5	10.693	6.306
6M0JRDB_129603773_uff_E=563.30	-5.5	8.583	4.834
6M0JRDB_125429634_uff_E=502.94	-5.5	11.159	8.489
6M0JRDB_125429498_uff_E=568.24	-5.5	7.76	2.437
6M0JRDB_125429497_uff_E=567.88	-5.5	8.167	3.019
6M0JRDB_125429497_uff_E=567.88	-5.5	9.477	4.755
6M0JRDB_125429427_uff_E=542.77	-5.5	12.422	8.439
6M0JRDB_125429426_uff_E=525.50	-5.5	15.655	11.721
6M0JRDB_125429420_uff_E=541.67	-5.5	12.328	8.556
6M0JRDB_125429178_uff_E=504.54	-5.5	8.206	4.206
6M0JRDB_125429177_uff_E=507.62	-5.5	5.722	2.765
6M0JRDB_125429127_uff_E=505.08	-5.5	0	0
6M0JRDB_125429126_uff_E=510.78	-5.5	5.364	2.634
6M0JRDB_125428750_uff_E=537.29	-5.5	5.248	3.312
6M0JRDB_125428749_uff_E=493.62	-5.5	11.28	7.437
6M0JRDB_125428703_uff_E=526.27	-5.5	13.388	10.801
6M0JRDB_125427758_uff_E=519.13	-5.5	13.797	9.821
6M0JRDB_125427758_uff_E=519.13	-5.5	0	0
6M0JRDB_124301776_uff_E=496.28	-5.5	0	0
6M0JRDB_122400007_uff_E=563.29	-5.5	3.992	2.367
6M0JRDB_101288398_uff_E=438.73	-5.5	0	0
6M0JRDB_98159926_uff_E=475.82	-5.5	0	0
6M0JRDB_98125634_uff_E=613.87	-5.5	0	0
6M0JRDB_95988133_uff_E=478.45	-5.5	6.487	2.104
6M0JRDB_92222232_uff_E=435.92	-5.5	0	0
6M0JRDB_73331632_uff_E=609.71	-5.5	0	0
6M0JRDB_73053256_uff_E=792.96	-5.5	13.895	11.061
6M0JRDB_23424319_uff_E=490.69	-5.5	3.168	1.986
6M0JRDB_21629991_uff_E=425.22	-5.5	0	0
6M0JRDB_14589761_uff_E=525.45	-5.5	0	0
6M0JRDB_14589759_uff_E=441.86	-5.5	0	0
6M0JRDB_14067764_uff_E=703.84	-5.5	0	0
6M0JRDB_574586_uff_E=496.46	-5.5	0	0
6M0JRDB_13735050_uff_E=749.67	-5.5	13.333	11.034
6M0JRDB_25171637_uff_E=456.94	-5.5	11.541	8.315
6M0JRDB_25171637_uff_E=456.94	-5.5	10.686	8.525
6M0JRDB_44566075_uff_E=523.32	-5.5	14.201	12.092
6M0JRDB_46844022_uff_E=503.08	-5.5	4.661	2.204
6M0JRDB_71318422_uff_E=595.64	-5.5	3.967	2.091
6M0JRDB_73330625_uff_E=631.30	-5.5	10.149	7.719
6M0JRDB_73330762_uff_E=621.15	-5.5	4.498	2.632
6M0JRDB_73330762_uff_E=621.15	-5.5	0	0
6M0JRDB_73330764_uff_E=710.57	-5.5	11.108	7.708
6M0JRDB_73330910_uff_E=648.69	-5.5	7.774	3.508
6M0JRDB_73330911_uff_E=636.92	-5.5	9.25	5.404
6M0JRDB_73331209_uff_E=661.60	-5.5	9.316	3.2
6M0JRDB_73331344_uff_E=637.78	-5.5	8.438	4.08
6M0JRDB_73331344_uff_E=637.78	-5.5	8.96	5.679
6M0JRDB_73331347_uff_E=651.09	-5.5	10.436	7.714
6M0JRDB_73331491_uff_E=631.59	-5.5	10.583	7.373
6M0JRDB_73331491_uff_E=631.59	-5.5	10.182	7.726
6M0JRDB_73331628_uff_E=624.00	-5.5	8.788	5.128
6M0JRDB_74426566_uff_E=467.72	-5.5	6.14	2.994
6M0JRDB_91564943_uff_E=503.49	-5.5	12.95	9.9
6M0JRDB_118254099_uff_E=523.14	-5.5	0	0
6M0JRDB_118254121_uff_E=637.58	-5.5	8.755	4.924
6M0JRDB_118254131_uff_E=612.52	-5.5	14.024	10.132
6M0JRDB_118254142_uff_E=558.28	-5.5	12.822	10.017
6M0JRDB_118254142_uff_E=558.28	-5.5	13.221	11.211
6M0JRDB_118254145_uff_E=558.28	-5.5	12.907	11.233
6M0JRDB_118254145_uff_E=558.28	-5.5	13.201	11.198
6M0JRDB_118254151_uff_E=635.34	-5.5	14.159	12.397
6M0JRDB_118254179_uff_E=699.45	-5.5	13.018	10.656
6M0JRDB_118254182_uff_E=641.96	-5.5	4.612	2.83
6M0JRDB_118254214_uff_E=630.93	-5.5	14.061	11.154
6M0JRDB_118254214_uff_E=630.93	-5.5	16.715	13.389
6M0JRDB_118254216_uff_E=633.63	-5.5	11.322	8.746
6M0JRDB_118254219_uff_E=599.83	-5.5	6.37	2.614
6M0JRDB_118254219_uff_E=599.83	-5.5	4.836	1.939
6M0JRDB_118263233_uff_E=562.91	-5.5	0	0
6M0JRDB_118263244_uff_E=641.96	-5.5	4.767	2.898
6M0JRDB_118263245_uff_E=614.68	-5.5	12.367	10.26
6M0JRDB_118263247_uff_E=624.00	-5.5	8.853	5.015
6M0JRDB_118263248_uff_E=603.75	-5.5	6.692	3.062
6M0JRDB_118263248_uff_E=603.75	-5.5	0	0
6M0JRDB_118263250_uff_E=523.14	-5.5	0	0
6M0JRDB_118263268_uff_E=1104.59	-5.5	0	0
6M0JRDB_118263272_uff_E=1079.99	-5.5	0	0
6M0JRDB_118267046_uff_E=447.92	-5.5	0	0
6M0JRDB_123293391_uff_E=636.92	-5.5	9.125	5.38
6M0JRDB_123293391_uff_E=636.92	-5.5	10.395	6.187
6M0JRDB_123704177_uff_E=624.00	-5.5	8.606	4.887
6M0JRDB_131964492_uff_E=498.10	-5.5	5.809	3.858
6M0JRDB_131975184_uff_E=547.56	-5.5	7.38	3.967
6M0JRDB_135027778_uff_E=580.27	-5.5	1.989	1.571
6M0JRDB_137467381_uff_E=489.66	-5.5	7.713	4.88
6M0JRDB_137467381_uff_E=489.66	-5.5	12.387	10.309
6M0JRDB_138490235_uff_E=829.78	-5.5	11.564	9.341
6M0JRDB_138514334_uff_E=388.58	-5.5	5.672	3.168
6M0JRDB_138514335_uff_E=406.05	-5.5	6.338	2.171
6M0JRDB_138514335_uff_E=406.05	-5.5	0	0
6M0JRDB_138514463_uff_E=391.15	-5.5	12.117	9.981
6M0JRDB_142550524_uff_E=360.94	-5.5	0	0
6M0JRDB_142550538_uff_E=347.64	-5.5	5.559	2.278
6M0JRDB_144564067_uff_E=408.10	-5.5	0	0
6M0JRDB_144564153_uff_E=641.96	-5.5	4.735	2.929
6M0JRDB_147116578_uff_E=520.21	-5.5	10.466	7.883
6M0JRDB_153852916_uff_E=343.22	-5.5	0	0
6M0JRDB_154593892_uff_E=383.60	-5.5	0	0
6M0JRDB_56924747_uff_E=515.53	-5.5	2.267	1.345
6M0JRDB_56924747_uff_E=515.53	-5.5	8.374	3.988
6M0JRDB_56924747_uff_E=515.53	-5.5	7.233	4.604
6M0JRDB_56924747_uff_E=515.53	-5.5	8.341	4.09
6M0JRDB_56950845_uff_E=553.08	-5.5	12.654	8.539
6M0JRDB_56950845_uff_E=553.08	-5.5	10.677	8.002
6M0JRDB_56950845_uff_E=553.08	-5.5	11.324	8.096
6M0JRDB_127053185_uff_E=417.22	-5.5	12.115	9.959
6M0JRDB_127053185_uff_E=417.22	-5.5	13.383	10.795
6M0JRDB_127053185_uff_E=417.22	-5.5	4.958	2.141
6M0JRDB_137641183_uff_E=530.84	-5.5	11.777	8.785
6M0JRDB_25171632_uff_E=683.46	-5.5	5.353	2.797
6M0JRDB_25171635_uff_E=456.32	-5.5	13.785	10.512
6M0JRDB_25171849_uff_E=574.34	-5.5	12.641	10.736
6M0JRDB_46843964_uff_E=523.87	-5.5	13.213	10.332
6M0JRDB_5126442_uff_E=412.73	-5.5	0	0
6M0JRDB_44139468_uff_E=480.55	-5.5	12.419	9.671
6M0JRDB_44139468_uff_E=480.55	-5.5	12.931	10.044
6M0JRDB_44139468_uff_E=480.55	-5.5	13.663	10.525
6M0JRDB_44139588_uff_E=509.86	-5.5	4.085	2.888
6M0JRDB_44139588_uff_E=509.86	-5.5	2.868	2.04
6M0JRDB_121304016	-5.4	7.273	4.38
6M0JRDB_121304016	-5.4	8.838	3.681
6M0JRDB_144564119_uff_E=511.99	-5.4	7.329	3.617
6M0JRDB_134126306_uff_E=422.13	-5.4	6.25	2.767
6M0JRDB_132286528_uff_E=486.36	-5.4	0	0
6M0JRDB_132286457_uff_E=528.62	-5.4	9.278	4.428
6M0JRDB_132286359_uff_E=505.08	-5.4	13.647	9.907
6M0JRDB_132286340_uff_E=569.38	-5.4	0	0
6M0JRDB_132286165_uff_E=526.02	-5.4	12.606	8.766
6M0JRDB_132286067_uff_E=605.32	-5.4	10.449	7.985
6M0JRDB_132286067_uff_E=605.32	-5.4	11.745	9.007
6M0JRDB_132285940_uff_E=519.13	-5.4	10.897	7.504
6M0JRDB_129895618_uff_E=499.93	-5.4	10.033	7.563
6M0JRDB_129895451_uff_E=502.94	-5.4	3.878	1.983
6M0JRDB_129895443_uff_E=507.32	-5.4	5.354	2.66
6M0JRDB_129895222_uff_E=505.08	-5.4	11.771	9.345
6M0JRDB_129895205_uff_E=525.50	-5.4	15.522	11.812
6M0JRDB_129895087_uff_E=526.27	-5.4	9.923	4.592
6M0JRDB_129895087_uff_E=526.27	-5.4	8.684	3.319
6M0JRDB_129894893_uff_E=493.62	-5.4	5.45	2.682
6M0JRDB_129894712_uff_E=519.13	-5.4	13.697	9.826
6M0JRDB_129894712_uff_E=519.13	-5.4	0	0
6M0JRDB_129603774_uff_E=553.99	-5.4	11.894	8.768
6M0JRDB_129603774_uff_E=553.99	-5.4	0	0
6M0JRDB_129603773_uff_E=563.30	-5.4	6.962	4.12
6M0JRDB_125429986_uff_E=507.32	-5.4	0	0
6M0JRDB_125429841_uff_E=499.93	-5.4	10.311	7.961
6M0JRDB_125429841_uff_E=499.93	-5.4	2.314	1.915
6M0JRDB_125429840_uff_E=506.48	-5.4	13.718	10.843
6M0JRDB_125429840_uff_E=506.48	-5.4	6.278	3.884
6M0JRDB_125429634_uff_E=502.94	-5.4	4.241	2.372
6M0JRDB_125429634_uff_E=502.94	-5.4	10.689	9.208
6M0JRDB_125429427_uff_E=542.77	-5.4	6.017	3.092
6M0JRDB_125429427_uff_E=542.77	-5.4	11.182	8.23
6M0JRDB_125429426_uff_E=525.50	-5.4	8.241	4.637
6M0JRDB_125429420_uff_E=541.67	-5.4	13.959	9.598
6M0JRDB_125429178_uff_E=504.54	-5.4	12.585	10.388
6M0JRDB_125429177_uff_E=507.62	-5.4	5.447	2.687
6M0JRDB_125428703_uff_E=526.27	-5.4	8.719	3.336
6M0JRDB_125428702_uff_E=552.27	-5.4	8.906	4.372
6M0JRDB_125428702_uff_E=552.27	-5.4	12.334	8.281
6M0JRDB_125427757_uff_E=524.66	-5.4	12.164	8.141
6M0JRDB_124307480_uff_E=353.26	-5.4	0	0
6M0JRDB_101749855_uff_E=354.12	-5.4	4.24	2.725
6M0JRDB_101749855_uff_E=354.12	-5.4	0	0
6M0JRDB_101592379_uff_E=353.83	-5.4	3.656	2.426
6M0JRDB_98125637_uff_E=650.71	-5.4	2.144	1.662
6M0JRDB_98125637_uff_E=650.71	-5.4	0	0
6M0JRDB_98125634_uff_E=613.87	-5.4	7.39	2.017
6M0JRDB_98058925_uff_E=284.04	-5.4	4.178	2.728
6M0JRDB_98058925_uff_E=284.04	-5.4	0	0
6M0JRDB_95988136_uff_E=478.36	-5.4	7.08	3.753
6M0JRDB_95988136_uff_E=478.36	-5.4	11.2	9.608
6M0JRDB_75641496_uff_E=414.15	-5.4	5.464	3.908
6M0JRDB_75641496_uff_E=414.15	-5.4	0	0
6M0JRDB_73331772_uff_E=586.44	-5.4	14.703	11.326
6M0JRDB_73331772_uff_E=586.44	-5.4	12.77	11.138
6M0JRDB_73053256_uff_E=792.96	-5.4	12.502	9.912
6M0JRDB_23424082_uff_E=486.48	-5.4	1.719	1.449
6M0JRDB_14067764_uff_E=703.84	-5.4	11.168	6.563
6M0JRDB_10837041_uff_E=552.85	-5.4	0	0
6M0JRDB_10810923_uff_E=477.96	-5.4	0	0
6M0JRDB_10643661_uff_E=493.88	-5.4	0	0
6M0JRDB_10621755_uff_E=626.37	-5.4	0	0
6M0JRDB_566721_uff_E=474.85	-5.4	0	0
6M0JRDB_13735050_uff_E=749.67	-5.4	7.142	4.211
6M0JRDB_44566075_uff_E=523.32	-5.4	7.488	2.912
6M0JRDB_46844022_uff_E=503.08	-5.4	12.69	10.625
6M0JRDB_46844023_uff_E=474.74	-5.4	12.941	10.464
6M0JRDB_46844023_uff_E=474.74	-5.4	13.361	11.071
6M0JRDB_46844083_uff_E=525.07	-5.4	13.681	10.156
6M0JRDB_46844083_uff_E=525.07	-5.4	6.611	3.574
6M0JRDB_56950846_uff_E=485.31	-5.4	8.831	4.382
6M0JRDB_56950846_uff_E=485.31	-5.4	15.344	10.936
6M0JRDB_56950846_uff_E=485.31	-5.4	14.275	12.49
6M0JRDB_57397525_uff_E=364.21	-5.4	0	0
6M0JRDB_70870984_uff_E=487.13	-5.4	12.997	10.334
6M0JRDB_70870984_uff_E=487.13	-5.4	4.662	3.198
6M0JRDB_71318420_uff_E=519.02	-5.4	3.108	2.626
6M0JRDB_71318422_uff_E=595.64	-5.4	3.212	1.698
6M0JRDB_73330625_uff_E=631.30	-5.4	13.129	9.752
6M0JRDB_73330625_uff_E=631.30	-5.4	14.756	11.449
6M0JRDB_73330625_uff_E=631.30	-5.4	16.169	12.81
6M0JRDB_73330762_uff_E=621.15	-5.4	6.432	2.361
6M0JRDB_73330766_uff_E=651.99	-5.4	5.337	2.69
6M0JRDB_73330766_uff_E=651.99	-5.4	7.615	2.73
6M0JRDB_73330766_uff_E=651.99	-5.4	16.301	12.976
6M0JRDB_73330910_uff_E=648.69	-5.4	5.211	3.244
6M0JRDB_73330911_uff_E=636.92	-5.4	12.144	8.148
6M0JRDB_73330912_uff_E=647.29	-5.4	3.558	2.549
6M0JRDB_73330912_uff_E=647.29	-5.4	10.478	6.911
6M0JRDB_73331060_uff_E=634.29	-5.4	6.854	3.638
6M0JRDB_73331060_uff_E=634.29	-5.4	7.173	3.353
6M0JRDB_73331060_uff_E=634.29	-5.4	5.269	3.353
6M0JRDB_73331060_uff_E=634.29	-5.4	6.785	2.903
6M0JRDB_73331205_uff_E=629.44	-5.4	10.898	7.851
6M0JRDB_73331205_uff_E=629.44	-5.4	7.835	3.069
6M0JRDB_73331205_uff_E=629.44	-5.4	12.386	7.951
6M0JRDB_73331208_uff_E=661.17	-5.4	13.787	10.119
6M0JRDB_73331208_uff_E=661.17	-5.4	17.06	13.145
6M0JRDB_73331209_uff_E=661.60	-5.4	10.148	6.511
6M0JRDB_73331349_uff_E=627.67	-5.4	7.548	3.996
6M0JRDB_73331487_uff_E=640.93	-5.4	13.652	10.859
6M0JRDB_73331487_uff_E=640.93	-5.4	16.318	13.241
6M0JRDB_73331488_uff_E=637.67	-5.4	11.193	8.173
6M0JRDB_73331488_uff_E=637.67	-5.4	14.616	12.449
6M0JRDB_73331490_uff_E=626.42	-5.4	11.685	8.862
6M0JRDB_73331490_uff_E=626.42	-5.4	5.414	3.765
6M0JRDB_74426566_uff_E=467.72	-5.4	10.958	7.72
6M0JRDB_74426566_uff_E=467.72	-5.4	4.52	3.158
6M0JRDB_75218824_uff_E=483.43	-5.4	12.673	10.689
6M0JRDB_75218825_uff_E=478.84	-5.4	5.617	2.948
6M0JRDB_75218825_uff_E=478.84	-5.4	12.192	9.41
6M0JRDB_75218825_uff_E=478.84	-5.4	4.036	2.307
6M0JRDB_75218864_uff_E=499.12	-5.4	12.794	8.948
6M0JRDB_75218864_uff_E=499.12	-5.4	14.963	12.263
6M0JRDB_75218864_uff_E=499.12	-5.4	12.49	9.988
6M0JRDB_75218864_uff_E=499.12	-5.4	13.52	10.888
6M0JRDB_118207010_uff_E=1815.50	-5.4	0	0
6M0JRDB_118218025_uff_E=467.72	-5.4	11.159	8.654
6M0JRDB_118254083_uff_E=620.90	-5.4	10.426	7.002
6M0JRDB_118254083_uff_E=620.90	-5.4	9.531	5.98
6M0JRDB_118254083_uff_E=620.90	-5.4	7.466	4.372
6M0JRDB_118254121_uff_E=637.58	-5.4	10.583	7.969
6M0JRDB_118254131_uff_E=612.52	-5.4	15.559	11.465
6M0JRDB_118254142_uff_E=558.28	-5.4	7.634	2.127
6M0JRDB_118254142_uff_E=558.28	-5.4	14.047	11.473
6M0JRDB_118254145_uff_E=558.28	-5.4	14.055	11.483
6M0JRDB_118254145_uff_E=558.28	-5.4	11.789	9.351
6M0JRDB_118254190_uff_E=511.99	-5.4	7.292	3.606
6M0JRDB_118254190_uff_E=511.99	-5.4	6.81	3.252
6M0JRDB_118254213_uff_E=644.51	-5.4	10.839	6.47
6M0JRDB_118254213_uff_E=644.51	-5.4	10.515	6.704
6M0JRDB_118254216_uff_E=633.63	-5.4	9.825	6.151
6M0JRDB_118254216_uff_E=633.63	-5.4	18.796	15.378
6M0JRDB_118254246_uff_E=635.83	-5.4	10.134	6.557
6M0JRDB_118263233_uff_E=562.91	-5.4	7.08	3.673
6M0JRDB_118263241_uff_E=578.46	-5.4	11.283	9.268
6M0JRDB_118263242_uff_E=1835.61	-5.4	0	0
6M0JRDB_118263244_uff_E=641.96	-5.4	9.575	6.815
6M0JRDB_118263245_uff_E=614.68	-5.4	13.426	10.829
6M0JRDB_118263247_uff_E=624.00	-5.4	10.776	7.577
6M0JRDB_118263272_uff_E=1079.99	-5.4	11.935	9.613
6M0JRDB_118267073_uff_E=557.12	-5.4	6.868	3.455
6M0JRDB_118267073_uff_E=557.12	-5.4	6.578	2.48
6M0JRDB_123293391_uff_E=636.92	-5.4	10.689	8.037
6M0JRDB_123293391_uff_E=636.92	-5.4	10.502	6.216
6M0JRDB_123704177_uff_E=624.00	-5.4	10.551	7.399
6M0JRDB_123846923_uff_E=605.00	-5.4	5.863	3.295
6M0JRDB_123846923_uff_E=605.00	-5.4	0	0
6M0JRDB_129010273_uff_E=436.64	-5.4	0	0
6M0JRDB_131964492_uff_E=498.10	-5.4	7.238	3.929
6M0JRDB_131964506_uff_E=573.49	-5.4	5.949	3.104
6M0JRDB_131964506_uff_E=573.49	-5.4	6.94	2.665
6M0JRDB_131964506_uff_E=573.49	-5.4	12.689	8.92
6M0JRDB_131964506_uff_E=573.49	-5.4	6.444	3.048
6M0JRDB_131975182_uff_E=561.17	-5.4	9.796	8.456
6M0JRDB_131975184_uff_E=547.56	-5.4	6.938	2.803
6M0JRDB_135027778_uff_E=580.27	-5.4	6.423	2.859
6M0JRDB_137467381_uff_E=489.66	-5.4	4.595	2.573
6M0JRDB_137467381_uff_E=489.66	-5.4	4.529	2.073
6M0JRDB_137467447_uff_E=315.96	-5.4	5.812	2.389
6M0JRDB_137467528_uff_E=393.76	-5.4	0	0
6M0JRDB_137658162_uff_E=447.07	-5.4	0	0
6M0JRDB_138490235_uff_E=829.78	-5.4	11.701	10.106
6M0JRDB_138490235_uff_E=829.78	-5.4	4.728	2.552
6M0JRDB_138514334_uff_E=388.58	-5.4	12.294	9.996
6M0JRDB_138514335_uff_E=406.05	-5.4	2.647	2.112
6M0JRDB_142550519_uff_E=411.61	-5.4	0	0
6M0JRDB_142550537_uff_E=823.03	-5.4	12.032	9.554
6M0JRDB_142550537_uff_E=823.03	-5.4	5.262	3.327
6M0JRDB_144564153_uff_E=641.96	-5.4	9.814	5.585
6M0JRDB_147116578_uff_E=520.21	-5.4	11.676	8.008
6M0JRDB_148240297_uff_E=338.09	-5.4	3.797	2.001
6M0JRDB_153852917_uff_E=321.39	-5.4	0	0
6M0JRDB_154593892_uff_E=383.60	-5.4	5.871	2.392
6M0JRDB_630845_uff_E=373.54	-5.4	0	0
6M0JRDB_941385_uff_E=474.79	-5.4	0	0
6M0JRDB_56924745_uff_E=399.54	-5.4	0	0
6M0JRDB_56924747_uff_E=515.53	-5.4	12.506	8.553
6M0JRDB_56924747_uff_E=515.53	-5.4	2.438	1.83
6M0JRDB_56924747_uff_E=515.53	-5.4	6.828	2.332
6M0JRDB_56950845_uff_E=553.08	-5.4	9.479	7.506
6M0JRDB_57395698_uff_E=490.56	-5.4	3.617	2.529
6M0JRDB_57395698_uff_E=490.56	-5.4	0	0
6M0JRDB_127053185_uff_E=417.22	-5.4	12.568	9.965
6M0JRDB_137641183_uff_E=530.84	-5.4	3.553	2.718
6M0JRDB_137652147_uff_E=534.82	-5.4	3.951	2.443
6M0JRDB_139584816_uff_E=463.51	-5.4	0	0
6M0JRDB_253250_uff_E=428.28	-5.4	0	0
6M0JRDB_6452395_uff_E=485.14	-5.4	11.735	10.218
6M0JRDB_25171426_uff_E=435.36	-5.4	6.529	3.099
6M0JRDB_25171427_uff_E=451.54	-5.4	6.18	2.579
6M0JRDB_25171428_uff_E=435.54	-5.4	5.789	2.226
6M0JRDB_25171635_uff_E=456.32	-5.4	14.034	11.194
6M0JRDB_25171847_uff_E=476.88	-5.4	0	0
6M0JRDB_25171849_uff_E=574.34	-5.4	13.068	10.073
6M0JRDB_25171849_uff_E=574.34	-5.4	13.3	10.243
6M0JRDB_46843964_uff_E=523.87	-5.4	13.455	10.77
6M0JRDB_46843964_uff_E=523.87	-5.4	13.559	10.887
6M0JRDB_56950842_uff_E=522.07	-5.4	13.176	10.377
6M0JRDB_56950842_uff_E=522.07	-5.4	13.484	10.936
6M0JRDB_56950843_uff_E=482.15	-5.4	13.044	10.448
6M0JRDB_5126442_uff_E=412.73	-5.4	6.505	2.271
6M0JRDB_5702061_uff_E=436.39	-5.4	0	0
6M0JRDB_25172057_uff_E=459.89	-5.4	7.026	3.154
6M0JRDB_44139468_uff_E=480.55	-5.4	5.959	2.047
6M0JRDB_44139468_uff_E=480.55	-5.4	13.63	10.82
6M0JRDB_44139468_uff_E=480.55	-5.4	12.491	10.344
6M0JRDB_46844024_uff_E=467.06	-5.4	11.919	9.232
6M0JRDB_46844024_uff_E=467.06	-5.4	12.414	9.658
6M0JRDB_46844024_uff_E=467.06	-5.4	12.486	10.308
6M0JRDB_161302_uff_E=363.38	-5.4	0	0
6M0JRDB_978395_uff_E=436.39	-5.4	0	0
6M0JRDB_25171633_uff_E=466.90	-5.4	13.07	10.373
6M0JRDB_3512_uff_E=436.39	-5.4	0	0
6M0JRDB_144564119_uff_E=511.99	-5.3	6.979	2.477
6M0JRDB_144564119_uff_E=511.99	-5.3	12.544	9.349
6M0JRDB_144564119_uff_E=511.99	-5.3	12.506	10.254
6M0JRDB_132286528_uff_E=486.36	-5.3	3.132	1.359
6M0JRDB_132286397_uff_E=602.85	-5.3	4.317	1.633
6M0JRDB_132286397_uff_E=602.85	-5.3	7.83	2.991
6M0JRDB_132286397_uff_E=602.85	-5.3	7.284	3.375
6M0JRDB_132286359_uff_E=505.08	-5.3	5.475	2.741
6M0JRDB_132286165_uff_E=526.02	-5.3	12.063	7.713
6M0JRDB_132286165_uff_E=526.02	-5.3	8.789	3.126
6M0JRDB_132286067_uff_E=605.32	-5.3	6.403	3.196
6M0JRDB_132285949_uff_E=530.49	-5.3	8.854	2.367
6M0JRDB_129895451_uff_E=502.94	-5.3	10.952	8.269
6M0JRDB_129895373_uff_E=537.90	-5.3	0	0
6M0JRDB_129895205_uff_E=525.50	-5.3	12.41	9.211
6M0JRDB_129603774_uff_E=553.99	-5.3	9.902	4.772
6M0JRDB_129603773_uff_E=563.30	-5.3	8.404	4.647
6M0JRDB_125429986_uff_E=507.32	-5.3	5.323	2.431
6M0JRDB_125429985_uff_E=511.44	-5.3	0	0
6M0JRDB_125429840_uff_E=506.48	-5.3	6.71	3.809
6M0JRDB_125429497_uff_E=567.88	-5.3	5.111	3.187
6M0JRDB_125429427_uff_E=542.77	-5.3	11.476	8.14
6M0JRDB_125429427_uff_E=542.77	-5.3	9.977	4.976
6M0JRDB_125429419_uff_E=537.90	-5.3	0	0
6M0JRDB_125429178_uff_E=504.54	-5.3	7.599	2.884
6M0JRDB_125429127_uff_E=505.08	-5.3	13.592	9.714
6M0JRDB_125429126_uff_E=510.78	-5.3	13.53	10.035
6M0JRDB_125428703_uff_E=526.27	-5.3	9.938	4.545
6M0JRDB_125428702_uff_E=552.27	-5.3	12.871	8.16
6M0JRDB_125428702_uff_E=552.27	-5.3	13.35	8.845
6M0JRDB_125428702_uff_E=552.27	-5.3	7.725	4.1
6M0JRDB_125427758_uff_E=519.13	-5.3	10.914	7.488
6M0JRDB_101749852_uff_E=396.61	-5.3	10.2	8.018
6M0JRDB_101288398_uff_E=438.73	-5.3	6.564	2.515
6M0JRDB_99908084_uff_E=713.20	-5.3	0	0
6M0JRDB_98125636_uff_E=608.30	-5.3	0	0
6M0JRDB_98058927_uff_E=293.39	-5.3	5.478	2.944
6M0JRDB_98058927_uff_E=293.39	-5.3	0	0
6M0JRDB_98058926_uff_E=284.11	-5.3	0	0
6M0JRDB_98058925_uff_E=284.04	-5.3	5.91	2.472
6M0JRDB_98058924_uff_E=293.41	-5.3	0	0
6M0JRDB_95988136_uff_E=478.36	-5.3	6.374	3.026
6M0JRDB_95988136_uff_E=478.36	-5.3	5.78	3.27
6M0JRDB_95988135_uff_E=481.81	-5.3	3.563	2.035
6M0JRDB_95988134_uff_E=482.23	-5.3	12.489	10.434
6M0JRDB_95988134_uff_E=482.23	-5.3	12.406	10.658
6M0JRDB_95988133_uff_E=478.45	-5.3	12.104	9.911
6M0JRDB_95988133_uff_E=478.45	-5.3	11.729	9.994
6M0JRDB_92222233_uff_E=448.40	-5.3	0	0
6M0JRDB_92222232_uff_E=435.92	-5.3	6.539	2.407
6M0JRDB_84820866_uff_E=608.30	-5.3	0	0
6M0JRDB_76970921_uff_E=483.51	-5.3	13.412	11.633
6M0JRDB_76970921_uff_E=483.51	-5.3	5.39	3.177
6M0JRDB_76964619_uff_E=417.09	-5.3	0	0
6M0JRDB_75641496_uff_E=414.15	-5.3	5.38	3.409
6M0JRDB_73331632_uff_E=609.71	-5.3	13.635	10.783
6M0JRDB_73331632_uff_E=609.71	-5.3	13.484	11.487
6M0JRDB_56691266_uff_E=482.23	-5.3	6.655	1.958
6M0JRDB_56691266_uff_E=482.23	-5.3	12.393	9.624
6M0JRDB_56691266_uff_E=482.23	-5.3	12.391	10.664
6M0JRDB_40455568_uff_E=387.73	-5.3	0	0
6M0JRDB_25171429_uff_E=423.15	-5.3	2.534	2.029
6M0JRDB_20841686_uff_E=406.51	-5.3	0	0
6M0JRDB_14589761_uff_E=525.45	-5.3	6.214	2.335
6M0JRDB_14589753_uff_E=472.14	-5.3	3.679	1.967
6M0JRDB_14589753_uff_E=472.14	-5.3	0	0
6M0JRDB_14589751_uff_E=447.75	-5.3	4.704	1.619
6M0JRDB_14589751_uff_E=447.75	-5.3	0	0
6M0JRDB_10787864_uff_E=481.64	-5.3	4.583	2.075
6M0JRDB_10787864_uff_E=481.64	-5.3	0	0
6M0JRDB_10691346_uff_E=498.60	-5.3	0	0
6M0JRDB_10690292_uff_E=457.16	-5.3	0	0
6M0JRDB_10574693_uff_E=486.37	-5.3	9.606	6.339
6M0JRDB_10574693_uff_E=486.37	-5.3	4.487	2.582
6M0JRDB_626596_uff_E=481.66	-5.3	14.714	11.283
6M0JRDB_626596_uff_E=481.66	-5.3	0	0
6M0JRDB_620374_uff_E=372.95	-5.3	6.006	3.619
6M0JRDB_620370_uff_E=467.26	-5.3	5.134	3.173
6M0JRDB_620370_uff_E=467.26	-5.3	0	0
6M0JRDB_617713_uff_E=360.61	-5.3	0	0
6M0JRDB_566721_uff_E=474.85	-5.3	6.358	2.136
6M0JRDB_10097_uff_E=554.35	-5.3	0	0
6M0JRDB_611914_uff_E=389.12	-5.3	6.26	2.618
6M0JRDB_611914_uff_E=389.12	-5.3	0	0
6M0JRDB_612127_uff_E=488.19	-5.3	0	0
6M0JRDB_13735050_uff_E=749.67	-5.3	15.297	10.154
6M0JRDB_13735050_uff_E=749.67	-5.3	13.656	11.066
6M0JRDB_14565581_uff_E=465.26	-5.3	0	0
6M0JRDB_14565585_uff_E=471.35	-5.3	0	0
6M0JRDB_25171637_uff_E=456.94	-5.3	11.316	8.101
6M0JRDB_44566075_uff_E=523.32	-5.3	13.903	10.719
6M0JRDB_44566075_uff_E=523.32	-5.3	13.171	11.413
6M0JRDB_44566075_uff_E=523.32	-5.3	11.71	10.004
6M0JRDB_46844022_uff_E=503.08	-5.3	12.899	9.813
6M0JRDB_46844023_uff_E=474.74	-5.3	13.494	11.123
6M0JRDB_46844083_uff_E=525.07	-5.3	13.162	8.72
6M0JRDB_46844083_uff_E=525.07	-5.3	11.393	8.791
6M0JRDB_46844083_uff_E=525.07	-5.3	5.661	2.648
6M0JRDB_46844083_uff_E=525.07	-5.3	7.225	2.738
6M0JRDB_57397525_uff_E=364.21	-5.3	6.2	2.361
6M0JRDB_57397525_uff_E=364.21	-5.3	11.588	9.219
6M0JRDB_57397525_uff_E=364.21	-5.3	4.527	2.946
6M0JRDB_68024713_uff_E=427.25	-5.3	1.39	1.251
6M0JRDB_68024713_uff_E=427.25	-5.3	5.758	2.162
6M0JRDB_70870984_uff_E=487.13	-5.3	12.195	9.111
6M0JRDB_71318420_uff_E=519.02	-5.3	12.592	10.302
6M0JRDB_71318422_uff_E=595.64	-5.3	13.799	11.973
6M0JRDB_73330762_uff_E=621.15	-5.3	5.548	2.885
6M0JRDB_73330766_uff_E=651.99	-5.3	9.92	6.209
6M0JRDB_73330910_uff_E=648.69	-5.3	7.424	4.181
6M0JRDB_73330910_uff_E=648.69	-5.3	12.497	8.249
6M0JRDB_73330911_uff_E=636.92	-5.3	11.249	7.614
6M0JRDB_73330911_uff_E=636.92	-5.3	7.089	3.847
6M0JRDB_73331205_uff_E=629.44	-5.3	10.076	6.496
6M0JRDB_73331208_uff_E=661.17	-5.3	10.621	8.17
6M0JRDB_73331209_uff_E=661.60	-5.3	14.712	10.814
6M0JRDB_73331344_uff_E=637.78	-5.3	9.814	4.09
6M0JRDB_73331346_uff_E=611.27	-5.3	12.135	8.848
6M0JRDB_73331346_uff_E=611.27	-5.3	12.019	8.987
6M0JRDB_73331347_uff_E=651.09	-5.3	11.718	9.455
6M0JRDB_73331347_uff_E=651.09	-5.3	12.533	9.737
6M0JRDB_73331349_uff_E=627.67	-5.3	10.539	7.766
6M0JRDB_73331487_uff_E=640.93	-5.3	15.493	11.487
6M0JRDB_89798228_uff_E=373.07	-5.3	0	0
6M0JRDB_91564943_uff_E=503.49	-5.3	6.275	2.59
6M0JRDB_118218025_uff_E=467.72	-5.3	6.081	2.767
6M0JRDB_118218025_uff_E=467.72	-5.3	3.579	2.676
6M0JRDB_118254099_uff_E=523.14	-5.3	11.761	10.068
6M0JRDB_118254103_uff_E=631.96	-5.3	9.589	7.122
6M0JRDB_118254131_uff_E=612.52	-5.3	7.654	3.204
6M0JRDB_118254182_uff_E=641.96	-5.3	9.859	5.676
6M0JRDB_118254190_uff_E=511.99	-5.3	12.507	9.344
6M0JRDB_118254190_uff_E=511.99	-5.3	12.457	10.194
6M0JRDB_118254213_uff_E=644.51	-5.3	11.211	7.745
6M0JRDB_118254227_uff_E=641.19	-5.3	11.168	8.095
6M0JRDB_118254227_uff_E=641.19	-5.3	0	0
6M0JRDB_118254232_uff_E=631.91	-5.3	10.484	7.263
6M0JRDB_118254232_uff_E=631.91	-5.3	7.663	5.497
6M0JRDB_118254246_uff_E=635.83	-5.3	9.293	5.158
6M0JRDB_118254246_uff_E=635.83	-5.3	2.857	2.156
6M0JRDB_118254246_uff_E=635.83	-5.3	10.841	7.19
6M0JRDB_118263228_uff_E=472.25	-5.3	6.573	2.011
6M0JRDB_118263231_uff_E=574.80	-5.3	5.919	3.363
6M0JRDB_118263233_uff_E=562.91	-5.3	12.62	11.03
6M0JRDB_118263243_uff_E=326.16	-5.3	0	0
6M0JRDB_118263244_uff_E=641.96	-5.3	8.846	5.096
6M0JRDB_118263244_uff_E=641.96	-5.3	4.03	3.018
6M0JRDB_118263244_uff_E=641.96	-5.3	9.812	6.111
6M0JRDB_118263245_uff_E=614.68	-5.3	12.775	10.725
6M0JRDB_118263248_uff_E=603.75	-5.3	7.252	3.93
6M0JRDB_118263250_uff_E=523.14	-5.3	11.76	10.051
6M0JRDB_118263251_uff_E=515.77	-5.3	0	0
6M0JRDB_118263264_uff_E=1066.87	-5.3	0	0
6M0JRDB_118263269_uff_E=1102.50	-5.3	0	0
6M0JRDB_118263272_uff_E=1079.99	-5.3	11.97	9.727
6M0JRDB_118267046_uff_E=447.92	-5.3	11.66	9.613
6M0JRDB_118267073_uff_E=557.12	-5.3	12.975	10.148
6M0JRDB_118267073_uff_E=557.12	-5.3	6.744	3.397
6M0JRDB_118267073_uff_E=557.12	-5.3	12.308	10.809
6M0JRDB_123282608_uff_E=523.14	-5.3	11.813	10.105
6M0JRDB_123282608_uff_E=523.14	-5.3	14.03	12.104
6M0JRDB_123282608_uff_E=523.14	-5.3	6.558	3.888
6M0JRDB_131964492_uff_E=498.10	-5.3	12.522	10.272
6M0JRDB_131964506_uff_E=573.49	-5.3	12.61	10.469
6M0JRDB_131975182_uff_E=561.17	-5.3	10.911	6.287
6M0JRDB_131975182_uff_E=561.17	-5.3	13.124	7.909
6M0JRDB_131975184_uff_E=547.56	-5.3	6.583	3.308
6M0JRDB_137467368_uff_E=441.10	-5.3	0	0
6M0JRDB_137467447_uff_E=315.96	-5.3	6.057	2.479
6M0JRDB_137467528_uff_E=393.76	-5.3	13.974	12.712
6M0JRDB_138490235_uff_E=829.78	-5.3	4.154	2.505
6M0JRDB_138496616_uff_E=483.72	-5.3	11.063	9.046
6M0JRDB_138496616_uff_E=483.72	-5.3	3.767	2.096
6M0JRDB_138514334_uff_E=388.58	-5.3	5.308	3.547
6M0JRDB_138514335_uff_E=406.05	-5.3	11.849	9.052
6M0JRDB_138514463_uff_E=391.15	-5.3	3.414	1.853
6M0JRDB_138514465_uff_E=385.97	-5.3	0	0
6M0JRDB_142550537_uff_E=823.03	-5.3	5.624	3.615
6M0JRDB_142550537_uff_E=823.03	-5.3	11.862	9.115
6M0JRDB_144564145_uff_E=652.83	-5.3	9.761	7.381
6M0JRDB_144564153_uff_E=641.96	-5.3	8.774	4.84
6M0JRDB_146559679_uff_E=391.25	-5.3	0	0
6M0JRDB_147116578_uff_E=520.21	-5.3	10.223	7.818
6M0JRDB_147116578_uff_E=520.21	-5.3	10.955	8.288
6M0JRDB_148240297_uff_E=338.09	-5.3	5.726	3.629
6M0JRDB_153852917_uff_E=321.39	-5.3	2.14	1.801
6M0JRDB_153989287_uff_E=412.33	-5.3	10.708	8.353
6M0JRDB_154388188_uff_E=342.57	-5.3	0	0
6M0JRDB_620368_uff_E=417.12	-5.3	0	0
6M0JRDB_630845_uff_E=373.54	-5.3	11.705	9.344
6M0JRDB_44139590_uff_E=680.31	-5.3	6.029	3.747
6M0JRDB_44139590_uff_E=680.31	-5.3	2.622	2.291
6M0JRDB_44139590_uff_E=680.31	-5.3	12.484	9.672
6M0JRDB_56924747_uff_E=515.53	-5.3	6.112	3.114
6M0JRDB_137641183_uff_E=530.84	-5.3	6.529	2.983
6M0JRDB_137652147_uff_E=534.82	-5.3	6.73	2.782
6M0JRDB_176431_uff_E=457.70	-5.3	0	0
6M0JRDB_6452395_uff_E=485.14	-5.3	4.637	2.45
6M0JRDB_6452395_uff_E=485.14	-5.3	12.946	11.284
6M0JRDB_25171634_uff_E=425.00	-5.3	0	0
6M0JRDB_25171849_uff_E=574.34	-5.3	5.648	3.244
6M0JRDB_44566031_uff_E=562.36	-5.3	6.344	3.143
6M0JRDB_56950704_uff_E=442.06	-5.3	5.518	2.183
6M0JRDB_56950842_uff_E=522.07	-5.3	12.218	10.032
6M0JRDB_56950843_uff_E=482.15	-5.3	13.67	10.964
6M0JRDB_631655_uff_E=461.61	-5.3	0	0
6M0JRDB_25172057_uff_E=459.89	-5.3	12.629	10.04
6M0JRDB_161302_uff_E=363.38	-5.3	1.854	1.555
6M0JRDB_25171633_uff_E=466.90	-5.3	12.821	10.461
6M0JRDB_44565921_uff_E=420.30	-5.3	0	0
6M0JRDB_132286496_uff_E=560.09	-5.2	12.452	8.458
6M0JRDB_132286340_uff_E=569.38	-5.2	4.226	1.622
6M0JRDB_132286165_uff_E=526.02	-5.2	16.258	10.547
6M0JRDB_132285856_uff_E=542.41	-5.2	0	0
6M0JRDB_129895618_uff_E=499.93	-5.2	10.937	8.948
6M0JRDB_129895481_uff_E=567.88	-5.2	14.556	11.198
6M0JRDB_129895451_uff_E=502.94	-5.2	10.633	8.755
6M0JRDB_129895443_uff_E=507.32	-5.2	13.118	9.82
6M0JRDB_129895087_uff_E=526.27	-5.2	15.131	11.277
6M0JRDB_129894712_uff_E=519.13	-5.2	5.399	2.48
6M0JRDB_129603774_uff_E=553.99	-5.2	13.094	7.766
6M0JRDB_129603774_uff_E=553.99	-5.2	4.274	2.738
6M0JRDB_129603774_uff_E=553.99	-5.2	7.75	3.204
6M0JRDB_129603773_uff_E=563.30	-5.2	8.49	4.773
6M0JRDB_129603773_uff_E=563.30	-5.2	8.362	5.188
6M0JRDB_129603773_uff_E=563.30	-5.2	8.038	5.173
6M0JRDB_125429985_uff_E=511.44	-5.2	5.444	2.637
6M0JRDB_125429841_uff_E=499.93	-5.2	5.708	3.804
6M0JRDB_125429497_uff_E=567.88	-5.2	3.554	2.095
6M0JRDB_125429427_uff_E=542.77	-5.2	2.396	1.922
6M0JRDB_125429426_uff_E=525.50	-5.2	12.592	9.591
6M0JRDB_125429426_uff_E=525.50	-5.2	12.228	8.901
6M0JRDB_125429127_uff_E=505.08	-5.2	5.4	2.716
6M0JRDB_125429127_uff_E=505.08	-5.2	6.613	3.776
6M0JRDB_125428702_uff_E=552.27	-5.2	10.924	8.228
6M0JRDB_125428417_uff_E=471.95	-5.2	0	0
6M0JRDB_125427758_uff_E=519.13	-5.2	3.986	2.239
6M0JRDB_125427757_uff_E=524.66	-5.2	11.284	7.564
6M0JRDB_124301776_uff_E=496.28	-5.2	6.918	2.516
6M0JRDB_122400012_uff_E=584.80	-5.2	4.353	2.417
6M0JRDB_122400007_uff_E=563.29	-5.2	13.979	10.117
6M0JRDB_102239942_uff_E=477.31	-5.2	0	0
6M0JRDB_102066899_uff_E=443.95	-5.2	0	0
6M0JRDB_98125634_uff_E=613.87	-5.2	10.433	8.606
6M0JRDB_98058927_uff_E=293.39	-5.2	11.984	9.872
6M0JRDB_98058926_uff_E=284.11	-5.2	12.403	9.793
6M0JRDB_98058925_uff_E=284.04	-5.2	13.048	10.888
6M0JRDB_98058925_uff_E=284.04	-5.2	11.7	9.782
6M0JRDB_95988136_uff_E=478.36	-5.2	11.591	9.959
6M0JRDB_95988135_uff_E=481.81	-5.2	12.752	10.529
6M0JRDB_95988135_uff_E=481.81	-5.2	6.757	2.15
6M0JRDB_95988134_uff_E=482.23	-5.2	12.076	10.17
6M0JRDB_92860931_uff_E=404.45	-5.2	6.358	2.131
6M0JRDB_92860931_uff_E=404.45	-5.2	0	0
6M0JRDB_76973167_uff_E=599.22	-5.2	6.303	2.484
6M0JRDB_73331772_uff_E=586.44	-5.2	13.479	10.946
6M0JRDB_73053256_uff_E=792.96	-5.2	12.498	10.316
6M0JRDB_73053256_uff_E=792.96	-5.2	11.019	9.473
6M0JRDB_72726987_uff_E=607.92	-5.2	11.216	6.986
6M0JRDB_71777464_uff_E=374.80	-5.2	0	0
6M0JRDB_56691266_uff_E=482.23	-5.2	12.064	10.143
6M0JRDB_25171429_uff_E=423.15	-5.2	12.064	9.435
6M0JRDB_25171429_uff_E=423.15	-5.2	6.215	1.953
6M0JRDB_23424413_uff_E=399.30	-5.2	1.027	0.975
6M0JRDB_23424413_uff_E=399.30	-5.2	0	0
6M0JRDB_23424321_uff_E=494.61	-5.2	3.513	2.358
6M0JRDB_23424082_uff_E=486.48	-5.2	14.107	12.494
6M0JRDB_23424082_uff_E=486.48	-5.2	3.409	2.071
6M0JRDB_21820746_uff_E=391.93	-5.2	0	0
6M0JRDB_21629991_uff_E=425.22	-5.2	11.288	9.692
6M0JRDB_21629991_uff_E=425.22	-5.2	6.232	2.268
6M0JRDB_20841686_uff_E=406.51	-5.2	11.63	8.696
6M0JRDB_14589759_uff_E=441.86	-5.2	5.14	2.108
6M0JRDB_14565584_uff_E=434.46	-5.2	3.469	1.894
6M0JRDB_14565584_uff_E=434.46	-5.2	0	0
6M0JRDB_11603327_uff_E=498.67	-5.2	0	0
6M0JRDB_10763672_uff_E=488.17	-5.2	0	0
6M0JRDB_10715802_uff_E=497.31	-5.2	5.993	3.809
6M0JRDB_10712095_uff_E=399.63	-5.2	0	0
6M0JRDB_10687333_uff_E=410.19	-5.2	0	0
6M0JRDB_10621755_uff_E=626.37	-5.2	2.365	1.951
6M0JRDB_10621755_uff_E=626.37	-5.2	6.681	3.052
6M0JRDB_10619960_uff_E=518.46	-5.2	0	0
6M0JRDB_10497262_uff_E=397.63	-5.2	0	0
6M0JRDB_629676_uff_E=362.11	-5.2	0	0
6M0JRDB_620374_uff_E=372.95	-5.2	6.131	2.933
6M0JRDB_620374_uff_E=372.95	-5.2	13.142	10.39
6M0JRDB_617268_uff_E=361.47	-5.2	0	0
6M0JRDB_592609_uff_E=494.95	-5.2	0	0
6M0JRDB_586858_uff_E=517.53	-5.2	0	0
6M0JRDB_586839_uff_E=882.59	-5.2	11.561	9.453
6M0JRDB_574586_uff_E=496.46	-5.2	4.745	2.858
6M0JRDB_566721_uff_E=474.85	-5.2	6.725	2.511
6M0JRDB_611914_uff_E=389.12	-5.2	5.077	3.484
6M0JRDB_611914_uff_E=389.12	-5.2	6.761	3.495
6M0JRDB_611918_uff_E=475.46	-5.2	6.387	2.364
6M0JRDB_611918_uff_E=475.46	-5.2	0	0
6M0JRDB_612127_uff_E=488.19	-5.2	12.597	9.815
6M0JRDB_23955821_uff_E=351.99	-5.2	14.896	13.568
6M0JRDB_23955821_uff_E=351.99	-5.2	0	0
6M0JRDB_25171637_uff_E=456.94	-5.2	11.641	8.833
6M0JRDB_44566068_uff_E=401.62	-5.2	0	0
6M0JRDB_46844022_uff_E=503.08	-5.2	13.405	10.581
6M0JRDB_46844022_uff_E=503.08	-5.2	12.503	10.186
6M0JRDB_46844023_uff_E=474.74	-5.2	12.423	10.212
6M0JRDB_46844083_uff_E=525.07	-5.2	6.619	3.396
6M0JRDB_46844083_uff_E=525.07	-5.2	8.873	3.708
6M0JRDB_57390407_uff_E=486.36	-5.2	3.379	2.112
6M0JRDB_57390407_uff_E=486.36	-5.2	1.955	1.573
6M0JRDB_57397525_uff_E=364.21	-5.2	3.824	2.349
6M0JRDB_71318420_uff_E=519.02	-5.2	2.604	2.168
6M0JRDB_71318422_uff_E=595.64	-5.2	3.353	2.24
6M0JRDB_73330764_uff_E=710.57	-5.2	10.446	7.503
6M0JRDB_73330764_uff_E=710.57	-5.2	11.711	8.64
6M0JRDB_73330910_uff_E=648.69	-5.2	9.26	4.179
6M0JRDB_73331060_uff_E=634.29	-5.2	11.686	7.319
6M0JRDB_73331344_uff_E=637.78	-5.2	11.111	8.01
6M0JRDB_73331344_uff_E=637.78	-5.2	8.171	5.582
6M0JRDB_73331346_uff_E=611.27	-5.2	10.556	8.931
6M0JRDB_73331347_uff_E=651.09	-5.2	11.578	8.084
6M0JRDB_73331349_uff_E=627.67	-5.2	11.26	7.532
6M0JRDB_73331491_uff_E=631.59	-5.2	9.423	5.895
6M0JRDB_73331629_uff_E=624.62	-5.2	0	0
6M0JRDB_75218824_uff_E=483.43	-5.2	13.275	10.86
6M0JRDB_75218824_uff_E=483.43	-5.2	12.964	9.999
6M0JRDB_75218864_uff_E=499.12	-5.2	14.297	11.208
6M0JRDB_89798228_uff_E=373.07	-5.2	6.056	2.452
6M0JRDB_91035900_uff_E=505.87	-5.2	9.313	5.801
6M0JRDB_91564943_uff_E=503.49	-5.2	13.991	10.836
6M0JRDB_91820110_uff_E=337.73	-5.2	0	0
6M0JRDB_118207010_uff_E=1815.50	-5.2	6.015	3.895
6M0JRDB_118254099_uff_E=523.14	-5.2	4.478	2.37
6M0JRDB_118254121_uff_E=637.58	-5.2	10.708	7.7
6M0JRDB_118254190_uff_E=511.99	-5.2	12.817	8.857
6M0JRDB_118254190_uff_E=511.99	-5.2	6.95	2.445
6M0JRDB_118254213_uff_E=644.51	-5.2	8.991	4.926
6M0JRDB_118254213_uff_E=644.51	-5.2	10.171	5.341
6M0JRDB_118254227_uff_E=641.19	-5.2	4.651	2.685
6M0JRDB_118254246_uff_E=635.83	-5.2	10.231	7.076
6M0JRDB_118263228_uff_E=472.25	-5.2	10.624	7.55
6M0JRDB_118263237_uff_E=588.21	-5.2	2.486	2.04
6M0JRDB_118263241_uff_E=578.46	-5.2	14.912	11.961
6M0JRDB_118263241_uff_E=578.46	-5.2	7.786	2.702
6M0JRDB_118263243_uff_E=326.16	-5.2	13.096	11.58
6M0JRDB_118263243_uff_E=326.16	-5.2	4.979	2.728
6M0JRDB_118263243_uff_E=326.16	-5.2	5.828	2.872
6M0JRDB_118263244_uff_E=641.96	-5.2	10.627	7.412
6M0JRDB_118263248_uff_E=603.75	-5.2	12.726	10.638
6M0JRDB_118263248_uff_E=603.75	-5.2	4.846	2.987
6M0JRDB_118263250_uff_E=523.14	-5.2	4.537	2.444
6M0JRDB_118263251_uff_E=515.77	-5.2	6.749	3.097
6M0JRDB_118263264_uff_E=1066.87	-5.2	2.114	1.589
6M0JRDB_118263264_uff_E=1066.87	-5.2	11.755	9.917
6M0JRDB_118267045_uff_E=475.47	-5.2	0	0
6M0JRDB_118267046_uff_E=447.92	-5.2	6.449	2.685
6M0JRDB_123282608_uff_E=523.14	-5.2	4.495	2.405
6M0JRDB_123825667_uff_E=368.14	-5.2	0	0
6M0JRDB_123836216_uff_E=631.96	-5.2	9.635	7.163
6M0JRDB_123846923_uff_E=605.00	-5.2	7.19	3.016
6M0JRDB_123846923_uff_E=605.00	-5.2	6.914	3.915
6M0JRDB_124024037_uff_E=377.64	-5.2	0	0
6M0JRDB_131964492_uff_E=498.10	-5.2	13.075	9.877
6M0JRDB_131964505_uff_E=399.09	-5.2	0	0
6M0JRDB_131975182_uff_E=561.17	-5.2	12.029	8.33
6M0JRDB_131975182_uff_E=561.17	-5.2	11.999	5.93
6M0JRDB_135027778_uff_E=580.27	-5.2	14.223	10.32
6M0JRDB_135027778_uff_E=580.27	-5.2	4.909	3.034
6M0JRDB_137467381_uff_E=489.66	-5.2	12.47	10.576
6M0JRDB_137467381_uff_E=489.66	-5.2	7.055	2.786
6M0JRDB_137467447_uff_E=315.96	-5.2	2.448	2.238
6M0JRDB_137467528_uff_E=393.76	-5.2	13.402	10.227
6M0JRDB_137467528_uff_E=393.76	-5.2	6.788	3.68
6M0JRDB_138514334_uff_E=388.58	-5.2	5.506	3.855
6M0JRDB_138514335_uff_E=406.05	-5.2	6.359	2.877
6M0JRDB_138514336_uff_E=331.78	-5.2	6.188	3.176
6M0JRDB_142550519_uff_E=411.61	-5.2	5.518	2.37
6M0JRDB_142550537_uff_E=823.03	-5.2	5.721	3.628
6M0JRDB_144564153_uff_E=641.96	-5.2	10.604	7.256
6M0JRDB_146559679_uff_E=391.25	-5.2	12.822	9.672
6M0JRDB_153989287_uff_E=412.33	-5.2	10.753	9.195
6M0JRDB_153989287_uff_E=412.33	-5.2	4.192	2.208
6M0JRDB_153989287_uff_E=412.33	-5.2	6.479	1.852
6M0JRDB_153989287_uff_E=412.33	-5.2	11.03	8.167
6M0JRDB_154388188_uff_E=342.57	-5.2	3.585	2.433
6M0JRDB_620368_uff_E=417.12	-5.2	6.067	3.533
6M0JRDB_6604225_uff_E=488.78	-5.2	0	0
6M0JRDB_10761572_uff_E=428.30	-5.2	0	0
6M0JRDB_44139590_uff_E=680.31	-5.2	13.099	11.502
6M0JRDB_44148513_uff_E=442.54	-5.2	0	0
6M0JRDB_56924745_uff_E=399.54	-5.2	5.18	3.216
6M0JRDB_57397526_uff_E=321.86	-5.2	5.053	2.876
6M0JRDB_57397526_uff_E=321.86	-5.2	0	0
6M0JRDB_131770040_uff_E=354.57	-5.2	0	0
6M0JRDB_137652147_uff_E=534.82	-5.2	5.086	2.025
6M0JRDB_139588134_uff_E=457.99	-5.2	0	0
6M0JRDB_176431_uff_E=457.70	-5.2	12.854	10.468
6M0JRDB_195521_uff_E=426.42	-5.2	0	0
6M0JRDB_44565973_uff_E=439.63	-5.2	0	0
6M0JRDB_44565974_uff_E=433.18	-5.2	6.672	3.131
6M0JRDB_44566031_uff_E=562.36	-5.2	10.771	7.938
6M0JRDB_44566031_uff_E=562.36	-5.2	5.596	2.942
6M0JRDB_56950842_uff_E=522.07	-5.2	12.749	9.742
6M0JRDB_56950842_uff_E=522.07	-5.2	12.328	9.137
6M0JRDB_56950843_uff_E=482.15	-5.2	12.992	10.313
6M0JRDB_195522_uff_E=471.34	-5.2	0	0
6M0JRDB_5126442_uff_E=412.73	-5.2	8.05	4.379
6M0JRDB_21677661_uff_E=485.34	-5.2	0	0
6M0JRDB_3082005_uff_E=446.17	-5.2	0	0
6M0JRDB_71317160_uff_E=364.50	-5.2	0	0
6M0JRDB_144564119_uff_E=511.99	-5.1	13.093	10.277
6M0JRDB_144564119_uff_E=511.99	-5.1	12.934	9.003
6M0JRDB_144564061_uff_E=397.26	-5.1	0	0
6M0JRDB_132286528_uff_E=486.36	-5.1	15.475	11.137
6M0JRDB_132286528_uff_E=486.36	-5.1	12.358	8.119
6M0JRDB_132286496_uff_E=560.09	-5.1	8.138	3.112
6M0JRDB_132286496_uff_E=560.09	-5.1	4.654	2.302
6M0JRDB_132286457_uff_E=528.62	-5.1	7.375	4.249
6M0JRDB_132286322_uff_E=531.16	-5.1	8.604	2.401
6M0JRDB_132286165_uff_E=526.02	-5.1	7.719	4.3
6M0JRDB_132286067_uff_E=605.32	-5.1	13.466	9.876
6M0JRDB_132286067_uff_E=605.32	-5.1	7.498	2.369
6M0JRDB_132285940_uff_E=519.13	-5.1	10.477	8.104
6M0JRDB_132285856_uff_E=542.41	-5.1	14.999	9.299
6M0JRDB_129895618_uff_E=499.93	-5.1	12.099	9.102
6M0JRDB_129895481_uff_E=567.88	-5.1	16.462	12.191
6M0JRDB_129895451_uff_E=502.94	-5.1	10.845	8.078
6M0JRDB_129895373_uff_E=537.90	-5.1	13.665	9.867
6M0JRDB_129895222_uff_E=505.08	-5.1	3.945	1.96
6M0JRDB_129895222_uff_E=505.08	-5.1	3.973	2.522
6M0JRDB_129895087_uff_E=526.27	-5.1	18.286	12.792
6M0JRDB_129895087_uff_E=526.27	-5.1	15.358	9.816
6M0JRDB_129895087_uff_E=526.27	-5.1	12.152	8.755
6M0JRDB_129895087_uff_E=526.27	-5.1	7.897	3.746
6M0JRDB_129895030_uff_E=475.88	-5.1	2.675	1.261
6M0JRDB_129894893_uff_E=493.62	-5.1	9.634	5.63
6M0JRDB_125429986_uff_E=507.32	-5.1	13.251	10.416
6M0JRDB_125429841_uff_E=499.93	-5.1	11.173	9.118
6M0JRDB_125429634_uff_E=502.94	-5.1	11.172	8.75
6M0JRDB_125429497_uff_E=567.88	-5.1	16.414	11.741
6M0JRDB_125429497_uff_E=567.88	-5.1	11.876	9.284
6M0JRDB_125429427_uff_E=542.77	-5.1	12.774	9.002
6M0JRDB_125429427_uff_E=542.77	-5.1	13.849	10.194
6M0JRDB_125429420_uff_E=541.67	-5.1	6.425	2.913
6M0JRDB_125429419_uff_E=537.90	-5.1	13.623	9.693
6M0JRDB_125429177_uff_E=507.62	-5.1	13.409	10.016
6M0JRDB_125429126_uff_E=510.78	-5.1	16.725	12.834
6M0JRDB_125428750_uff_E=537.29	-5.1	5.685	3.357
6M0JRDB_125428750_uff_E=537.29	-5.1	10.969	8.447
6M0JRDB_125428750_uff_E=537.29	-5.1	3.033	2.412
6M0JRDB_125428750_uff_E=537.29	-5.1	11.122	8.455
6M0JRDB_125428703_uff_E=526.27	-5.1	18.345	12.898
6M0JRDB_125428703_uff_E=526.27	-5.1	15.233	11.289
6M0JRDB_125428417_uff_E=471.95	-5.1	13.051	10.091
6M0JRDB_125427758_uff_E=519.13	-5.1	10.554	6.597
6M0JRDB_124301776_uff_E=496.28	-5.1	5.5	3.208
6M0JRDB_124301775_uff_E=494.73	-5.1	12.541	9.825
6M0JRDB_124301775_uff_E=494.73	-5.1	0	0
6M0JRDB_122400012_uff_E=584.80	-5.1	11.78	9.355
6M0JRDB_122400007_uff_E=563.29	-5.1	3.699	2.292
6M0JRDB_122400007_uff_E=563.29	-5.1	3.529	2.414
6M0JRDB_102239942_uff_E=477.31	-5.1	4.85	3.245
6M0JRDB_102066899_uff_E=443.95	-5.1	5.831	3.297
6M0JRDB_101749855_uff_E=354.12	-5.1	3.229	2.236
6M0JRDB_101592379_uff_E=353.83	-5.1	5.519	2.319
6M0JRDB_101592379_uff_E=353.83	-5.1	4.581	2.844
6M0JRDB_98159927_uff_E=447.95	-5.1	0	0
6M0JRDB_98125635_uff_E=587.84	-5.1	7.485	3.125
6M0JRDB_98058926_uff_E=284.11	-5.1	6.126	3.948
6M0JRDB_98058926_uff_E=284.11	-5.1	11.129	8.333
6M0JRDB_98058926_uff_E=284.11	-5.1	10.787	8.504
6M0JRDB_98058925_uff_E=284.04	-5.1	4.765	3.376
6M0JRDB_95988136_uff_E=478.36	-5.1	11.161	8.507
6M0JRDB_95988136_uff_E=478.36	-5.1	11.643	9.186
6M0JRDB_92860931_uff_E=404.45	-5.1	2.152	1.656
6M0JRDB_92222233_uff_E=448.40	-5.1	6.368	2.236
6M0JRDB_92222231_uff_E=448.41	-5.1	0	0
6M0JRDB_76970921_uff_E=483.51	-5.1	6.866	2.534
6M0JRDB_76968174_uff_E=424.16	-5.1	0	0
6M0JRDB_75641496_uff_E=414.15	-5.1	5.565	3.331
6M0JRDB_73331772_uff_E=586.44	-5.1	14.34	10.483
6M0JRDB_73331632_uff_E=609.71	-5.1	8.578	3.404
6M0JRDB_73053256_uff_E=792.96	-5.1	10.193	6.55
6M0JRDB_73053256_uff_E=792.96	-5.1	11.883	9.191
6M0JRDB_72726987_uff_E=607.92	-5.1	11.186	8.904
6M0JRDB_72726987_uff_E=607.92	-5.1	11.822	9.426
6M0JRDB_72726987_uff_E=607.92	-5.1	12.756	8.043
6M0JRDB_25171429_uff_E=423.15	-5.1	12.474	10.129
6M0JRDB_25171429_uff_E=423.15	-5.1	11.482	9.095
6M0JRDB_25171429_uff_E=423.15	-5.1	12.432	10.147
6M0JRDB_23424320_uff_E=445.80	-5.1	10.803	8.971
6M0JRDB_23424318_uff_E=443.60	-5.1	10.718	9.178
6M0JRDB_23424318_uff_E=443.60	-5.1	6.451	1.9
6M0JRDB_23424082_uff_E=486.48	-5.1	7.018	2.938
6M0JRDB_23424082_uff_E=486.48	-5.1	5.454	3.611
6M0JRDB_21820746_uff_E=391.93	-5.1	11.978	9.611
6M0JRDB_21677662_uff_E=400.18	-5.1	0	0
6M0JRDB_14565587_uff_E=489.93	-5.1	0	0
6M0JRDB_14565584_uff_E=434.46	-5.1	11.567	9.695
6M0JRDB_14565584_uff_E=434.46	-5.1	6.209	2.321
6M0JRDB_14565583_uff_E=446.70	-5.1	0	0
6M0JRDB_14067764_uff_E=703.84	-5.1	9.707	5.347
6M0JRDB_11603327_uff_E=498.67	-5.1	12.844	10.303
6M0JRDB_11603327_uff_E=498.67	-5.1	6.235	2.864
6M0JRDB_10810786_uff_E=493.34	-5.1	0	0
6M0JRDB_10785158_uff_E=562.11	-5.1	0	0
6M0JRDB_10691346_uff_E=498.60	-5.1	5.645	3.589
6M0JRDB_10687333_uff_E=410.19	-5.1	12.096	9.288
6M0JRDB_10687333_uff_E=410.19	-5.1	3.752	2.292
6M0JRDB_10642700_uff_E=509.25	-5.1	11.218	8.959
6M0JRDB_10642700_uff_E=509.25	-5.1	0	0
6M0JRDB_10621755_uff_E=626.37	-5.1	7.423	3.598
6M0JRDB_10497262_uff_E=397.63	-5.1	11.77	10.024
6M0JRDB_10406626_uff_E=512.41	-5.1	0	0
6M0JRDB_620374_uff_E=372.95	-5.1	4.618	3.256
6M0JRDB_620242_uff_E=487.43	-5.1	5.279	3.451
6M0JRDB_620242_uff_E=487.43	-5.1	0	0
6M0JRDB_617268_uff_E=361.47	-5.1	12.578	10.244
6M0JRDB_586839_uff_E=882.59	-5.1	10.79	8.874
6M0JRDB_566721_uff_E=474.85	-5.1	6.29	2.481
6M0JRDB_10019062_uff_E=415.66	-5.1	0	0
6M0JRDB_13735050_uff_E=749.67	-5.1	13.305	11.161
6M0JRDB_13735050_uff_E=749.67	-5.1	7.654	2.983
6M0JRDB_14565585_uff_E=471.35	-5.1	11.541	9.547
6M0JRDB_14737140_uff_E=464.56	-5.1	3.468	3.08
6M0JRDB_23955821_uff_E=351.99	-5.1	5.545	3.352
6M0JRDB_44139587_uff_E=1748.94	-5.1	13.918	10.089
6M0JRDB_44566068_uff_E=401.62	-5.1	14.403	11.059
6M0JRDB_56950844_uff_E=501.37	-5.1	0	0
6M0JRDB_57390407_uff_E=486.36	-5.1	6.977	2.966
6M0JRDB_57390407_uff_E=486.36	-5.1	14.249	10.671
6M0JRDB_57390407_uff_E=486.36	-5.1	13.996	12.395
6M0JRDB_57397525_uff_E=364.21	-5.1	10.392	8.358
6M0JRDB_68024713_uff_E=427.25	-5.1	5.682	2.137
6M0JRDB_68727568_uff_E=497.72	-5.1	0	0
6M0JRDB_70658189_uff_E=385.06	-5.1	6.275	1.732
6M0JRDB_70870984_uff_E=487.13	-5.1	5.688	2.316
6M0JRDB_71043635_uff_E=1668.80	-5.1	6.36	2.814
6M0JRDB_71318420_uff_E=519.02	-5.1	3.598	2.925
6M0JRDB_73330762_uff_E=621.15	-5.1	6.816	2.606
6M0JRDB_73330762_uff_E=621.15	-5.1	5.364	2.893
6M0JRDB_73330766_uff_E=651.99	-5.1	8.56	2.83
6M0JRDB_73330912_uff_E=647.29	-5.1	11.013	7.362
6M0JRDB_73331205_uff_E=629.44	-5.1	6.734	3.209
6M0JRDB_73331205_uff_E=629.44	-5.1	2.811	1.877
6M0JRDB_73331628_uff_E=624.00	-5.1	6.719	2.958
6M0JRDB_73331628_uff_E=624.00	-5.1	10.554	7.354
6M0JRDB_75218823_uff_E=527.02	-5.1	0	0
6M0JRDB_75218824_uff_E=483.43	-5.1	13.211	10.814
6M0JRDB_75218864_uff_E=499.12	-5.1	13.254	10.719
6M0JRDB_91564943_uff_E=503.49	-5.1	1.572	1.393
6M0JRDB_91564943_uff_E=503.49	-5.1	5.189	3.004
6M0JRDB_91820110_uff_E=337.73	-5.1	5.161	2.99
6M0JRDB_91820110_uff_E=337.73	-5.1	11.754	8.636
6M0JRDB_118218025_uff_E=467.72	-5.1	11.728	9.874
6M0JRDB_118218025_uff_E=467.72	-5.1	11.999	9.357
6M0JRDB_118254083_uff_E=620.90	-5.1	6.986	4.411
6M0JRDB_118254083_uff_E=620.90	-5.1	6.413	4.043
6M0JRDB_118254099_uff_E=523.14	-5.1	7.971	3.276
6M0JRDB_118254099_uff_E=523.14	-5.1	4.52	2.343
6M0JRDB_118254131_uff_E=612.52	-5.1	12.58	10.49
6M0JRDB_118254131_uff_E=612.52	-5.1	11.425	9.525
6M0JRDB_118254131_uff_E=612.52	-5.1	13.957	11.354
6M0JRDB_118254213_uff_E=644.51	-5.1	9.364	4.633
6M0JRDB_118254216_uff_E=633.63	-5.1	15.176	11.357
6M0JRDB_118254216_uff_E=633.63	-5.1	4.251	3.052
6M0JRDB_118254219_uff_E=599.83	-5.1	5.986	3.088
6M0JRDB_118254219_uff_E=599.83	-5.1	10.743	8.538
6M0JRDB_118254227_uff_E=641.19	-5.1	10.002	4.435
6M0JRDB_118254227_uff_E=641.19	-5.1	6.598	2.314
6M0JRDB_118254246_uff_E=635.83	-5.1	10.897	7.73
6M0JRDB_118263231_uff_E=574.80	-5.1	6.254	2.231
6M0JRDB_118263233_uff_E=562.91	-5.1	11.397	9.014
6M0JRDB_118263237_uff_E=588.21	-5.1	13.176	10.135
6M0JRDB_118263241_uff_E=578.46	-5.1	7.775	2.39
6M0JRDB_118263242_uff_E=1835.61	-5.1	5.772	3.179
6M0JRDB_118263243_uff_E=326.16	-5.1	13.32	10.037
6M0JRDB_118263244_uff_E=641.96	-5.1	6.748	2.766
6M0JRDB_118263247_uff_E=624.00	-5.1	9.712	6.063
6M0JRDB_118263247_uff_E=624.00	-5.1	10.659	7.575
6M0JRDB_118263250_uff_E=523.14	-5.1	7.874	3.01
6M0JRDB_118263251_uff_E=515.77	-5.1	2.648	2.176
6M0JRDB_118263268_uff_E=1104.59	-5.1	9.344	8.069
6M0JRDB_118263268_uff_E=1104.59	-5.1	8.129	4.006
6M0JRDB_118263269_uff_E=1102.50	-5.1	11.354	9.198
6M0JRDB_118263272_uff_E=1079.99	-5.1	12.31	8.426
6M0JRDB_118267045_uff_E=475.47	-5.1	5.02	3.117
6M0JRDB_118267046_uff_E=447.92	-5.1	6.338	2.266
6M0JRDB_118267097_uff_E=473.76	-5.1	6.957	3.367
6M0JRDB_118267097_uff_E=473.76	-5.1	11.783	9.192
6M0JRDB_118267131_uff_E=382.54	-5.1	6.245	2.333
6M0JRDB_118267131_uff_E=382.54	-5.1	0	0
6M0JRDB_123282608_uff_E=523.14	-5.1	7.887	2.995
6M0JRDB_123282608_uff_E=523.14	-5.1	4.659	2.559
6M0JRDB_123361815_uff_E=380.82	-5.1	6.446	3.311
6M0JRDB_123361815_uff_E=380.82	-5.1	0	0
6M0JRDB_123396595_uff_E=400.61	-5.1	0	0
6M0JRDB_123704177_uff_E=624.00	-5.1	10.43	7.509
6M0JRDB_123825667_uff_E=368.14	-5.1	4.919	3.018
6M0JRDB_123846923_uff_E=605.00	-5.1	12.833	10.155
6M0JRDB_124024037_uff_E=377.64	-5.1	14.545	12.218
6M0JRDB_129010273_uff_E=436.64	-5.1	12.702	10.139
6M0JRDB_131964492_uff_E=498.10	-5.1	7.082	3.714
6M0JRDB_131975182_uff_E=561.17	-5.1	8.237	5.048
6M0JRDB_135027778_uff_E=580.27	-5.1	6.219	2.321
6M0JRDB_137467367_uff_E=372.94	-5.1	11.983	10.126
6M0JRDB_137467367_uff_E=372.94	-5.1	5.889	3.462
6M0JRDB_137467524_uff_E=386.34	-5.1	10.791	8.753
6M0JRDB_137467524_uff_E=386.34	-5.1	10.822	9.599
6M0JRDB_137467524_uff_E=386.34	-5.1	5.042	3.094
6M0JRDB_137467528_uff_E=393.76	-5.1	14.524	11.061
6M0JRDB_137647518_uff_E=469.45	-5.1	0	0
6M0JRDB_138490235_uff_E=829.78	-5.1	5.413	3.481
6M0JRDB_138490235_uff_E=829.78	-5.1	6.168	3.681
6M0JRDB_138496616_uff_E=483.72	-5.1	11.749	9.586
6M0JRDB_138514335_uff_E=406.05	-5.1	10.663	8.463
6M0JRDB_138514335_uff_E=406.05	-5.1	7.068	4.462
6M0JRDB_138514463_uff_E=391.15	-5.1	5.86	4.165
6M0JRDB_142550537_uff_E=823.03	-5.1	11.708	9.576
6M0JRDB_142550538_uff_E=347.64	-5.1	11.107	9.658
6M0JRDB_144564145_uff_E=652.83	-5.1	14.007	10.781
6M0JRDB_153852917_uff_E=321.39	-5.1	3.771	2.426
6M0JRDB_153852917_uff_E=321.39	-5.1	4.147	3.57
6M0JRDB_154593892_uff_E=383.60	-5.1	11.434	9.777
6M0JRDB_31336_uff_E=499.84	-5.1	0	0
6M0JRDB_298140_uff_E=400.18	-5.1	0	0
6M0JRDB_941385_uff_E=474.79	-5.1	6.171	2.371
6M0JRDB_14706665_uff_E=484.89	-5.1	0	0
6M0JRDB_25171636_uff_E=493.57	-5.1	0	0
6M0JRDB_44139590_uff_E=680.31	-5.1	12.168	10.537
6M0JRDB_44139590_uff_E=680.31	-5.1	12.332	10.799
6M0JRDB_44139590_uff_E=680.31	-5.1	7.065	3.394
6M0JRDB_44139590_uff_E=680.31	-5.1	2.934	1.698
6M0JRDB_44566076_uff_E=484.63	-5.1	0	0
6M0JRDB_57393956_uff_E=482.31	-5.1	5.963	3.967
6M0JRDB_57393956_uff_E=482.31	-5.1	7.277	3.012
6M0JRDB_57397526_uff_E=321.86	-5.1	5.75	2.34
6M0JRDB_57397526_uff_E=321.86	-5.1	5.896	2.115
6M0JRDB_76973812_uff_E=262.34	-5.1	0	0
6M0JRDB_137652147_uff_E=534.82	-5.1	12.945	10.163
6M0JRDB_137652147_uff_E=534.82	-5.1	2.087	1.553
6M0JRDB_139588134_uff_E=457.99	-5.1	5.241	2.793
6M0JRDB_195521_uff_E=426.42	-5.1	3.81	2.339
6M0JRDB_6452395_uff_E=485.14	-5.1	12.339	10.439
6M0JRDB_15086460_uff_E=467.63	-5.1	10.896	8.713
6M0JRDB_15086460_uff_E=467.63	-5.1	6.202	2.958
6M0JRDB_15086460_uff_E=467.63	-5.1	0	0
6M0JRDB_25171632_uff_E=683.46	-5.1	6.485	2.719
6M0JRDB_25171632_uff_E=683.46	-5.1	10.699	7.41
6M0JRDB_25171847_uff_E=476.88	-5.1	4.59	2.058
6M0JRDB_25171847_uff_E=476.88	-5.1	6.336	2.609
6M0JRDB_44566031_uff_E=562.36	-5.1	10.255	7.625
6M0JRDB_56924746_uff_E=397.29	-5.1	0	0
6M0JRDB_56950842_uff_E=522.07	-5.1	6.496	2.646
6M0JRDB_56950842_uff_E=522.07	-5.1	12.793	9.609
6M0JRDB_56950843_uff_E=482.15	-5.1	12.415	10.03
6M0JRDB_118207067_uff_E=773.99	-5.1	0	0
6M0JRDB_195522_uff_E=471.34	-5.1	11.515	9.546
6M0JRDB_631655_uff_E=461.61	-5.1	12.356	10.553
6M0JRDB_21677661_uff_E=485.34	-5.1	4.845	3.198
6M0JRDB_161302_uff_E=363.38	-5.1	5.997	2.24
6M0JRDB_161302_uff_E=363.38	-5.1	12.598	10.609
6M0JRDB_978395_uff_E=436.39	-5.1	12.679	10.088
6M0JRDB_9974417_uff_E=422.04	-5.1	0	0
6M0JRDB_44565921_uff_E=420.30	-5.1	11.445	9.553
6M0JRDB_44565921_uff_E=420.30	-5.1	11.652	8.703
6M0JRDB_71317160_uff_E=364.50	-5.1	14.13	10.765
6M0JRDB_71317160_uff_E=364.50	-5.1	13.121	11.214
6M0JRDB_71317160_uff_E=364.50	-5.1	6.007	2.905
6M0JRDB_71317160_uff_E=364.50	-5.1	4.484	2.889
6M0JRDB_3512_uff_E=436.39	-5.1	12.69	10.136
6M0JRDB_144564119_uff_E=511.99	-5	14.017	11.457
6M0JRDB_133688441_uff_E=267.44	-5	12.392	10.476
6M0JRDB_132286528_uff_E=486.36	-5	12.527	8.242
6M0JRDB_132286496_uff_E=560.09	-5	9.596	3.376
6M0JRDB_132286496_uff_E=560.09	-5	10.161	2.996
6M0JRDB_132286359_uff_E=505.08	-5	13.622	8.687
6M0JRDB_132286322_uff_E=531.16	-5	14.399	10.132
6M0JRDB_132286165_uff_E=526.02	-5	7.828	2.865
6M0JRDB_132285949_uff_E=530.49	-5	7.247	3.969
6M0JRDB_132285940_uff_E=519.13	-5	7.953	2.922
6M0JRDB_132285940_uff_E=519.13	-5	3.776	2.32
6M0JRDB_132285940_uff_E=519.13	-5	10.344	6.542
6M0JRDB_129895481_uff_E=567.88	-5	5.156	4.279
6M0JRDB_129895481_uff_E=567.88	-5	10.791	8.814
6M0JRDB_129895481_uff_E=567.88	-5	11.808	8.966
6M0JRDB_129895451_uff_E=502.94	-5	11.109	7.884
6M0JRDB_129895222_uff_E=505.08	-5	11.696	7.684
6M0JRDB_129895222_uff_E=505.08	-5	10.197	7.827
6M0JRDB_129895030_uff_E=475.88	-5	12.647	9.67
6M0JRDB_129895030_uff_E=475.88	-5	13.185	10.445
6M0JRDB_129894712_uff_E=519.13	-5	13.417	8.443
6M0JRDB_129603774_uff_E=553.99	-5	9.044	4.036
6M0JRDB_129603774_uff_E=553.99	-5	13.924	9.15
6M0JRDB_125429985_uff_E=511.44	-5	10.622	7.742
6M0JRDB_125429841_uff_E=499.93	-5	7.04	4.315
6M0JRDB_125429634_uff_E=502.94	-5	13.067	10.183
6M0JRDB_125429497_uff_E=567.88	-5	13.866	10.985
6M0JRDB_125429426_uff_E=525.50	-5	13.29	9.525
6M0JRDB_125429178_uff_E=504.54	-5	15.969	11.899
6M0JRDB_125429126_uff_E=510.78	-5	13.933	10.297
6M0JRDB_125428750_uff_E=537.29	-5	14.085	11.168
6M0JRDB_125428750_uff_E=537.29	-5	10.196	7.823
6M0JRDB_125428749_uff_E=493.62	-5	11.812	8.305
6M0JRDB_125428749_uff_E=493.62	-5	11.829	7.545
6M0JRDB_125428703_uff_E=526.27	-5	15.567	9.933
6M0JRDB_125428416_uff_E=475.88	-5	2.427	1.259
6M0JRDB_125427757_uff_E=524.66	-5	5.062	2.435
6M0JRDB_124307480_uff_E=353.26	-5	5.776	2.311
6M0JRDB_124307480_uff_E=353.26	-5	5.967	2.161
6M0JRDB_122400012_uff_E=584.80	-5	4.563	2.878
6M0JRDB_101749855_uff_E=354.12	-5	5.997	2.521
6M0JRDB_101749855_uff_E=354.12	-5	5.724	2.777
6M0JRDB_101288398_uff_E=438.73	-5	2.301	1.861
6M0JRDB_101288398_uff_E=438.73	-5	12.713	9.912
6M0JRDB_98125637_uff_E=650.71	-5	12.218	8.747
6M0JRDB_98058927_uff_E=293.39	-5	6.097	2.093
6M0JRDB_98058925_uff_E=284.04	-5	5.752	2.047
6M0JRDB_95988133_uff_E=478.45	-5	4.7	2.781
6M0JRDB_92860931_uff_E=404.45	-5	13.083	11.454
6M0JRDB_92860931_uff_E=404.45	-5	4.773	2.821
6M0JRDB_92222232_uff_E=435.92	-5	6.363	2.033
6M0JRDB_92222231_uff_E=448.41	-5	12.377	10.329
6M0JRDB_76973167_uff_E=599.22	-5	6.458	2.709
6M0JRDB_73331772_uff_E=586.44	-5	14.317	12.322
6M0JRDB_73331772_uff_E=586.44	-5	12.627	10.534
6M0JRDB_72726987_uff_E=607.92	-5	13.061	9.127
6M0JRDB_72726987_uff_E=607.92	-5	12.975	9.284
6M0JRDB_72726987_uff_E=607.92	-5	11.492	9.761
6M0JRDB_71317161_uff_E=422.79	-5	0	0
6M0JRDB_71312580_uff_E=422.79	-5	11.307	9.463
6M0JRDB_71312580_uff_E=422.79	-5	0	0
6M0JRDB_56691266_uff_E=482.23	-5	15.423	11.797
6M0JRDB_56691266_uff_E=482.23	-5	4.583	2.474
6M0JRDB_56691266_uff_E=482.23	-5	5.787	2.64
6M0JRDB_40455568_uff_E=387.73	-5	12.362	10.542
6M0JRDB_25171846_uff_E=442.12	-5	0	0
6M0JRDB_23424433_uff_E=500.83	-5	14.327	12.649
6M0JRDB_23424433_uff_E=500.83	-5	15.324	11.253
6M0JRDB_23424433_uff_E=500.83	-5	14.922	11.654
6M0JRDB_23424433_uff_E=500.83	-5	14.221	10.07
6M0JRDB_23424433_uff_E=500.83	-5	14.892	13.011
6M0JRDB_23424319_uff_E=490.69	-5	5.889	3.871
6M0JRDB_22216755_uff_E=505.61	-5	11.38	9.44
6M0JRDB_22216755_uff_E=505.61	-5	5.664	3.663
6M0JRDB_22216755_uff_E=505.61	-5	0	0
6M0JRDB_20841686_uff_E=406.51	-5	10.915	8.362
6M0JRDB_14589759_uff_E=441.86	-5	3.358	2.098
6M0JRDB_14589751_uff_E=447.75	-5	5.167	2.099
6M0JRDB_14589751_uff_E=447.75	-5	4.545	2.038
6M0JRDB_14565589_uff_E=493.87	-5	0	0
6M0JRDB_14565583_uff_E=446.70	-5	6.237	2.34
6M0JRDB_14067764_uff_E=703.84	-5	3.18	2.223
6M0JRDB_14067764_uff_E=703.84	-5	1.469	1.173
6M0JRDB_11794329_uff_E=432.53	-5	0	0
6M0JRDB_10810923_uff_E=477.96	-5	11.578	9.408
6M0JRDB_10787978_uff_E=533.30	-5	4.821	2.092
6M0JRDB_10785158_uff_E=562.11	-5	13.671	11.755
6M0JRDB_10785158_uff_E=562.11	-5	5.134	3.267
6M0JRDB_10763672_uff_E=488.17	-5	11.943	9.911
6M0JRDB_10712095_uff_E=399.63	-5	3.917	2.627
6M0JRDB_10712095_uff_E=399.63	-5	5.103	2.727
6M0JRDB_10687333_uff_E=410.19	-5	4.948	2.317
6M0JRDB_10643661_uff_E=493.88	-5	11.652	9.534
6M0JRDB_10642700_uff_E=509.25	-5	11.398	9.145
6M0JRDB_10642700_uff_E=509.25	-5	6.274	2.253
6M0JRDB_10623284_uff_E=545.80	-5	2.408	1.928
6M0JRDB_10619960_uff_E=518.46	-5	12.089	9.972
6M0JRDB_10574693_uff_E=486.37	-5	10.223	8.177
6M0JRDB_10574693_uff_E=486.37	-5	10.844	8.287
6M0JRDB_10574693_uff_E=486.37	-5	9.873	7.931
6M0JRDB_10406626_uff_E=512.41	-5	11.405	9.421
6M0JRDB_629676_uff_E=362.11	-5	6.078	3.001
6M0JRDB_629676_uff_E=362.11	-5	4.466	3.023
6M0JRDB_622712_uff_E=363.04	-5	0	0
6M0JRDB_592609_uff_E=494.95	-5	11.701	9.672
6M0JRDB_566721_uff_E=474.85	-5	6.08	2.827
6M0JRDB_10097_uff_E=554.35	-5	4.857	3.232
6M0JRDB_10097_uff_E=554.35	-5	1.785	1.451
6M0JRDB_611914_uff_E=389.12	-5	11.172	9.697
6M0JRDB_978391_uff_E=427.59	-5	12.58	9.723
6M0JRDB_978391_uff_E=427.59	-5	0	0
6M0JRDB_10407853_uff_E=504.30	-5	0	0
6M0JRDB_14565581_uff_E=465.26	-5	12.894	11.478
6M0JRDB_14565581_uff_E=465.26	-5	6.328	3.253
6M0JRDB_14565585_uff_E=471.35	-5	11.315	8.839
6M0JRDB_14565585_uff_E=471.35	-5	6.215	2.387
6M0JRDB_44139587_uff_E=1748.94	-5	3.167	2.243
6M0JRDB_46843962_uff_E=816.62	-5	5.422	3.219
6M0JRDB_46843962_uff_E=816.62	-5	0	0
6M0JRDB_46843965_uff_E=501.88	-5	5.302	3.086
6M0JRDB_46843965_uff_E=501.88	-5	0	0
6M0JRDB_46844023_uff_E=474.74	-5	13.323	10.795
6M0JRDB_56950844_uff_E=501.37	-5	5.359	3.067
6M0JRDB_57390407_uff_E=486.36	-5	5.553	3.606
6M0JRDB_68727568_uff_E=497.72	-5	11.705	9.699
6M0JRDB_68727702_uff_E=407.12	-5	11.079	8.644
6M0JRDB_68727702_uff_E=407.12	-5	6.255	2.208
6M0JRDB_70658189_uff_E=385.06	-5	10.75	8.678
6M0JRDB_70870984_uff_E=487.13	-5	13.032	11.044
6M0JRDB_70870984_uff_E=487.13	-5	12.442	10.072
6M0JRDB_71318422_uff_E=595.64	-5	11.876	10.428
6M0JRDB_71737790_uff_E=419.80	-5	6.545	3.274
6M0JRDB_73330764_uff_E=710.57	-5	11.871	7.086
6M0JRDB_73330764_uff_E=710.57	-5	7.826	3.969
6M0JRDB_73330912_uff_E=647.29	-5	10.626	7.06
6M0JRDB_73330912_uff_E=647.29	-5	9.535	7.897
6M0JRDB_73331347_uff_E=651.09	-5	12.505	9.555
6M0JRDB_73331628_uff_E=624.00	-5	11.765	7.677
6M0JRDB_73331629_uff_E=624.62	-5	4.46	2.769
6M0JRDB_73331629_uff_E=624.62	-5	5.702	3.161
6M0JRDB_75218824_uff_E=483.43	-5	13.867	11.008
6M0JRDB_75218824_uff_E=483.43	-5	14.071	10.954
6M0JRDB_75218824_uff_E=483.43	-5	17.949	14.382
6M0JRDB_89798228_uff_E=373.07	-5	10.746	9.079
6M0JRDB_91035900_uff_E=505.87	-5	11.198	5.675
6M0JRDB_91820110_uff_E=337.73	-5	10.448	8.371
6M0JRDB_91820110_uff_E=337.73	-5	11.487	9.527
6M0JRDB_118207010_uff_E=1815.50	-5	6.131	3.001
6M0JRDB_118207010_uff_E=1815.50	-5	2.577	2.094
6M0JRDB_118254099_uff_E=523.14	-5	5.089	3.396
6M0JRDB_118254103_uff_E=631.96	-5	2.712	2.41
6M0JRDB_118254103_uff_E=631.96	-5	10.687	7.556
6M0JRDB_118254103_uff_E=631.96	-5	11.699	8.175
6M0JRDB_118254190_uff_E=511.99	-5	13.118	10.07
6M0JRDB_118254190_uff_E=511.99	-5	11.993	10.358
6M0JRDB_118254227_uff_E=641.19	-5	1.702	1.343
6M0JRDB_118263228_uff_E=472.25	-5	9.834	7.834
6M0JRDB_118263231_uff_E=574.80	-5	11.288	8.606
6M0JRDB_118263233_uff_E=562.91	-5	4.406	2.401
6M0JRDB_118263237_uff_E=588.21	-5	13.418	10.118
6M0JRDB_118263237_uff_E=588.21	-5	12.406	9.112
6M0JRDB_118263241_uff_E=578.46	-5	11.011	9.388
6M0JRDB_118263242_uff_E=1835.61	-5	3.928	2.295
6M0JRDB_118263242_uff_E=1835.61	-5	5.908	2.214
6M0JRDB_118263244_uff_E=641.96	-5	9.803	6.881
6M0JRDB_118263245_uff_E=614.68	-5	4.832	2.438
6M0JRDB_118263245_uff_E=614.68	-5	9.217	4.436
6M0JRDB_118263250_uff_E=523.14	-5	13.623	11.538
6M0JRDB_118263251_uff_E=515.77	-5	12.289	9.727
6M0JRDB_118263251_uff_E=515.77	-5	5.109	2.504
6M0JRDB_118263251_uff_E=515.77	-5	12.155	8.868
6M0JRDB_118263268_uff_E=1104.59	-5	8.599	7.297
6M0JRDB_118267045_uff_E=475.47	-5	12.425	10.497
6M0JRDB_118267046_uff_E=447.92	-5	2.81	1.975
6M0JRDB_118267049_uff_E=466.20	-5	11.43	9.98
6M0JRDB_118267049_uff_E=466.20	-5	2.807	1.972
6M0JRDB_118267049_uff_E=466.20	-5	0	0
6M0JRDB_118267052_uff_E=464.23	-5	0	0
6M0JRDB_118267073_uff_E=557.12	-5	11.394	9.216
6M0JRDB_118267096_uff_E=623.75	-5	0	0
6M0JRDB_118267097_uff_E=473.76	-5	6.381	2.193
6M0JRDB_118267097_uff_E=473.76	-5	19.083	17.863
6M0JRDB_119091269_uff_E=287.41	-5	0	0
6M0JRDB_123350254_uff_E=1809.62	-5	0	0
6M0JRDB_123825667_uff_E=368.14	-5	11.489	9.801
6M0JRDB_123825667_uff_E=368.14	-5	5.832	3.584
6M0JRDB_123836216_uff_E=631.96	-5	12.437	8.655
6M0JRDB_123836216_uff_E=631.96	-5	7.271	2.613
6M0JRDB_129010273_uff_E=436.64	-5	1.842	1.547
6M0JRDB_131964492_uff_E=498.10	-5	12.569	10.077
6M0JRDB_131964492_uff_E=498.10	-5	2.869	2.307
6M0JRDB_131975184_uff_E=547.56	-5	5.815	4.084
6M0JRDB_131975184_uff_E=547.56	-5	6.473	2.275
6M0JRDB_131975184_uff_E=547.56	-5	11.729	10.152
6M0JRDB_137467381_uff_E=489.66	-5	12.745	10.174
6M0JRDB_137467447_uff_E=315.96	-5	5.634	2.033
6M0JRDB_137467447_uff_E=315.96	-5	3.672	2.268
6M0JRDB_137467524_uff_E=386.34	-5	11.46	9.186
6M0JRDB_137467524_uff_E=386.34	-5	10.365	8.523
6M0JRDB_137467524_uff_E=386.34	-5	6.916	3.033
6M0JRDB_137467528_uff_E=393.76	-5	14.621	12.646
6M0JRDB_137647518_uff_E=469.45	-5	4.018	2.603
6M0JRDB_137647518_uff_E=469.45	-5	5.624	3.586
6M0JRDB_137658162_uff_E=447.07	-5	11.338	8.731
6M0JRDB_138496616_uff_E=483.72	-5	11.756	9.623
6M0JRDB_138514334_uff_E=388.58	-5	11.479	9.474
6M0JRDB_138514334_uff_E=388.58	-5	6.375	4.641
6M0JRDB_138514336_uff_E=331.78	-5	11.565	9.184
6M0JRDB_138514463_uff_E=391.15	-5	12.525	10.909
6M0JRDB_138514463_uff_E=391.15	-5	12.439	10.471
6M0JRDB_138514465_uff_E=385.97	-5	5.361	3.364
6M0JRDB_142550519_uff_E=411.61	-5	12.081	10.855
6M0JRDB_142550524_uff_E=360.94	-5	6.176	1.793
6M0JRDB_142550524_uff_E=360.94	-5	10.906	8.607
6M0JRDB_142550524_uff_E=360.94	-5	10.626	9.065
6M0JRDB_142550538_uff_E=347.64	-5	10.911	8.58
6M0JRDB_142550538_uff_E=347.64	-5	6.092	3.092
6M0JRDB_144564153_uff_E=641.96	-5	9.854	6.752
6M0JRDB_146559679_uff_E=391.25	-5	4.649	2.876
6M0JRDB_148240297_uff_E=338.09	-5	4.214	2.888
6M0JRDB_153852916_uff_E=343.22	-5	5.767	2.103
6M0JRDB_153852917_uff_E=321.39	-5	3.184	2.707
6M0JRDB_153989287_uff_E=412.33	-5	10.928	9.076
6M0JRDB_154178022_uff_E=368.39	-5	0	0
6M0JRDB_154388188_uff_E=342.57	-5	5.844	2.751
6M0JRDB_154593892_uff_E=383.60	-5	11.032	9.608
6M0JRDB_6604225_uff_E=488.78	-5	6.202	2.079
6M0JRDB_25171636_uff_E=493.57	-5	11.75	9.701
6M0JRDB_57397526_uff_E=321.86	-5	10.503	8.281
6M0JRDB_57397526_uff_E=321.86	-5	10.794	8.901
6M0JRDB_57397526_uff_E=321.86	-5	11.301	8.676
6M0JRDB_76973812_uff_E=262.34	-5	11.554	9.571
6M0JRDB_131770040_uff_E=354.57	-5	11.202	9.555
6M0JRDB_131770040_uff_E=354.57	-5	2.051	1.541
6M0JRDB_137652147_uff_E=534.82	-5	13.696	10.539
6M0JRDB_139588134_uff_E=457.99	-5	13.019	11.566
6M0JRDB_195521_uff_E=426.42	-5	11.784	9.787
6M0JRDB_253250_uff_E=428.28	-5	6.409	2.183
6M0JRDB_15086460_uff_E=467.63	-5	11.573	9.538
6M0JRDB_25171426_uff_E=435.36	-5	6.38	2.296
6M0JRDB_25171427_uff_E=451.54	-5	3.21	2.428
6M0JRDB_25171632_uff_E=683.46	-5	10.438	7.289
6M0JRDB_25171632_uff_E=683.46	-5	5.931	3.284
6M0JRDB_25171634_uff_E=425.00	-5	11.959	10.44
6M0JRDB_25171634_uff_E=425.00	-5	11.961	9.789
6M0JRDB_56924746_uff_E=397.29	-5	11.617	9.547
6M0JRDB_56924746_uff_E=397.29	-5	6.221	2.012
6M0JRDB_56950704_uff_E=442.06	-5	1.445	1.415
6M0JRDB_56950704_uff_E=442.06	-5	12.355	10.208
6M0JRDB_56950842_uff_E=522.07	-5	5.823	2.621
6M0JRDB_56950843_uff_E=482.15	-5	13.832	11.188
6M0JRDB_56950843_uff_E=482.15	-5	12.601	10.096
6M0JRDB_56950843_uff_E=482.15	-5	12.905	8.829
6M0JRDB_56950843_uff_E=482.15	-5	13.326	9.936
6M0JRDB_57392201_uff_E=381.98	-5	0	0
6M0JRDB_118207067_uff_E=773.99	-5	5.991	2.311
6M0JRDB_118207067_uff_E=773.99	-5	11.647	9.053
6M0JRDB_195522_uff_E=471.34	-5	6.204	2.372
6M0JRDB_289550_uff_E=239.38	-5	0	0
6M0JRDB_5702061_uff_E=436.39	-5	1.864	1.562
6M0JRDB_5702061_uff_E=436.39	-5	12.715	10.134
6M0JRDB_6713927_uff_E=497.21	-5	14.486	12.175
6M0JRDB_6713927_uff_E=497.21	-5	0	0
6M0JRDB_21677661_uff_E=485.34	-5	1.999	1.569
6M0JRDB_3082005_uff_E=446.17	-5	5.223	3.44
6M0JRDB_3082005_uff_E=446.17	-5	1.76	1.533
6M0JRDB_9974417_uff_E=422.04	-5	10.915	9.273
6M0JRDB_9974417_uff_E=422.04	-5	6.948	3.503
6M0JRDB_44565921_uff_E=420.30	-5	10.929	8.492
6M0JRDB_3512_uff_E=436.39	-5	6.313	2.44
6M0JRDB_441140_uff_E=466.49	-5	0	0
6M0JRDB_147554572_uff_E=341.50	-4.9	0	0
6M0JRDB_144564061_uff_E=397.26	-4.9	6.345	2.685
6M0JRDB_134126307_uff_E=430.18	-4.9	6.721	2.137
6M0JRDB_134126306_uff_E=422.13	-4.9	4.936	2.312
6M0JRDB_132286528_uff_E=486.36	-4.9	8.992	7.469
6M0JRDB_132286457_uff_E=528.62	-4.9	8.235	5.386
6M0JRDB_132286457_uff_E=528.62	-4.9	13.922	9.806
6M0JRDB_132286457_uff_E=528.62	-4.9	7.347	4.739
6M0JRDB_132286359_uff_E=505.08	-4.9	16.829	11.669
6M0JRDB_132286090_uff_E=475.88	-4.9	12.725	9.524
6M0JRDB_132286090_uff_E=475.88	-4.9	13.342	10.424
6M0JRDB_132286067_uff_E=605.32	-4.9	13.619	9.197
6M0JRDB_132285949_uff_E=530.49	-4.9	11.833	8.27
6M0JRDB_132285856_uff_E=542.41	-4.9	7.917	3.909
6M0JRDB_132285856_uff_E=542.41	-4.9	14.143	8.249
6M0JRDB_132285856_uff_E=542.41	-4.9	2.808	1.589
6M0JRDB_129895618_uff_E=499.93	-4.9	10.752	8.488
6M0JRDB_129895481_uff_E=567.88	-4.9	15.407	12.293
6M0JRDB_129895222_uff_E=505.08	-4.9	7.839	2.518
6M0JRDB_129895205_uff_E=525.50	-4.9	8.755	3.078
6M0JRDB_129895205_uff_E=525.50	-4.9	12.793	8.377
6M0JRDB_129895176_uff_E=504.54	-4.9	4.017	1.668
6M0JRDB_129895030_uff_E=475.88	-4.9	11.587	7.498
6M0JRDB_129894893_uff_E=493.62	-4.9	12.074	8.774
6M0JRDB_129603774_uff_E=553.99	-4.9	10.833	7.184
6M0JRDB_125429985_uff_E=511.44	-4.9	10.429	7.324
6M0JRDB_125429840_uff_E=506.48	-4.9	11.151	8.833
6M0JRDB_125429840_uff_E=506.48	-4.9	7.895	3.459
6M0JRDB_125429840_uff_E=506.48	-4.9	12.684	9.677
6M0JRDB_125429420_uff_E=541.67	-4.9	4.965	2.948
6M0JRDB_125429178_uff_E=504.54	-4.9	12.575	10.536
6M0JRDB_125429177_uff_E=507.62	-4.9	13.407	9.701
6M0JRDB_125429127_uff_E=505.08	-4.9	16.808	11.594
6M0JRDB_125429127_uff_E=505.08	-4.9	13.601	8.21
6M0JRDB_125429126_uff_E=510.78	-4.9	13.561	9.855
6M0JRDB_125428749_uff_E=493.62	-4.9	10.679	7.537
6M0JRDB_125428703_uff_E=526.27	-4.9	12.47	8.942
6M0JRDB_125428703_uff_E=526.27	-4.9	3.973	2.213
6M0JRDB_125428416_uff_E=475.88	-4.9	13.076	10.36
6M0JRDB_125428416_uff_E=475.88	-4.9	5.347	2.725
6M0JRDB_125428416_uff_E=475.88	-4.9	12.509	9.549
6M0JRDB_125427758_uff_E=519.13	-4.9	17.148	13.652
6M0JRDB_125427758_uff_E=519.13	-4.9	8.034	2.9
6M0JRDB_125427758_uff_E=519.13	-4.9	10.318	5.652
6M0JRDB_125427757_uff_E=524.66	-4.9	11.273	8.127
6M0JRDB_124307480_uff_E=353.26	-4.9	12.793	11.126
6M0JRDB_124301775_uff_E=494.73	-4.9	13.209	11.606
6M0JRDB_122400012_uff_E=584.80	-4.9	12.265	9.898
6M0JRDB_102239942_uff_E=477.31	-4.9	3.034	1.795
6M0JRDB_102239942_uff_E=477.31	-4.9	1.963	1.532
6M0JRDB_102066898_uff_E=415.66	-4.9	0	0
6M0JRDB_101749855_uff_E=354.12	-4.9	6.239	2.262
6M0JRDB_101749852_uff_E=396.61	-4.9	9.834	7.054
6M0JRDB_101749852_uff_E=396.61	-4.9	10.928	7.798
6M0JRDB_101592379_uff_E=353.83	-4.9	12.315	10.008
6M0JRDB_99908084_uff_E=713.20	-4.9	9.779	4.513
6M0JRDB_99908084_uff_E=713.20	-4.9	5.618	3.536
6M0JRDB_98125637_uff_E=650.71	-4.9	9.766	7.17
6M0JRDB_98125635_uff_E=587.84	-4.9	13.878	11.473
6M0JRDB_98125635_uff_E=587.84	-4.9	7.472	2.983
6M0JRDB_98058926_uff_E=284.11	-4.9	5.626	3.687
6M0JRDB_98058926_uff_E=284.11	-4.9	7.035	3.468
6M0JRDB_98058926_uff_E=284.11	-4.9	10.036	8.949
6M0JRDB_98058926_uff_E=284.11	-4.9	12.939	10.372
6M0JRDB_98058925_uff_E=284.04	-4.9	12.883	10.403
6M0JRDB_98058925_uff_E=284.04	-4.9	12.987	10.945
6M0JRDB_98058924_uff_E=293.41	-4.9	13.227	11.319
6M0JRDB_98058924_uff_E=293.41	-4.9	12.56	10.859
6M0JRDB_95988134_uff_E=482.23	-4.9	5.733	2.627
6M0JRDB_95988134_uff_E=482.23	-4.9	15.424	11.806
6M0JRDB_95988133_uff_E=478.45	-4.9	9.806	8.419
6M0JRDB_76970921_uff_E=483.51	-4.9	13.498	10.865
6M0JRDB_76970921_uff_E=483.51	-4.9	13.909	12.152
6M0JRDB_76970921_uff_E=483.51	-4.9	12.36	10.976
6M0JRDB_76968174_uff_E=424.16	-4.9	12.439	9.355
6M0JRDB_76964619_uff_E=417.09	-4.9	6.386	2.167
6M0JRDB_75641496_uff_E=414.15	-4.9	9.717	8.666
6M0JRDB_73331772_uff_E=586.44	-4.9	14.353	12.251
6M0JRDB_73053256_uff_E=792.96	-4.9	13.645	10.974
6M0JRDB_71317161_uff_E=422.79	-4.9	6.271	2.177
6M0JRDB_71317161_uff_E=422.79	-4.9	11.129	8.558
6M0JRDB_71317161_uff_E=422.79	-4.9	11.433	9.554
6M0JRDB_71312580_uff_E=422.79	-4.9	6.29	2.231
6M0JRDB_71312580_uff_E=422.79	-4.9	11.003	8.478
[truncated: 1,934 more rows]

## Sheet: PyRx_RdRp
Ligand	Binding Affinity	rmsd/ub	rmsd/lb
optfinalrdrp_73330763_uff_E=714.76	-8.2	0	0
optfinalrdrp_73330763_uff_E=714.76	-8.2	0	0
optfinalrdrp_118254151_uff_E=635.34	-8	0	0
optfinalrdrp_73331344_uff_E=637.78	-8	0	0
optfinalrdrp_73331209_uff_E=661.60	-8	0	0
optfinalrdrp_118254151_uff_E=635.34	-8	0	0
optfinalrdrp_73331344_uff_E=637.78	-8	0	0
optfinalrdrp_73331209_uff_E=661.60	-8	0	0
optfinalrdrp_56924747_uff_E=515.53	-7.9	0	0
optfinalrdrp_118254216_uff_E=633.63	-7.9	0	0
optfinalrdrp_73330763_uff_E=714.76	-7.9	11.007	5.205
optfinalrdrp_56924747_uff_E=515.53	-7.9	0	0
optfinalrdrp_118254216_uff_E=633.63	-7.9	0	0
optfinalrdrp_73330763_uff_E=714.76	-7.9	10.991	5.205
optfinalrdrp_46844082_uff_E=682.67	-7.9	0	0
optfinalrdrp_46844082_uff_E=682.67	-7.9	4.459	2.237
optfinalrdrp_56924747_uff_E=515.53	-7.8	11.528	8.971
optfinalrdrp_118254151_uff_E=635.34	-7.8	9.415	3.678
optfinalrdrp_118254151_uff_E=635.34	-7.8	9.088	5.719
optfinalrdrp_73331209_uff_E=661.60	-7.8	9.254	3.32
optfinalrdrp_118254151_uff_E=635.34	-7.8	9.41	3.677
optfinalrdrp_73331487_uff_E=640.93	-7.8	0	0
optfinalrdrp_73331209_uff_E=661.60	-7.8	7.92	5.98
optfinalrdrp_73331209_uff_E=661.60	-7.8	9.245	3.301
optfinalrdrp_46844082_uff_E=682.67	-7.8	2.857	1.977
optfinalrdrp_46844082_uff_E=682.67	-7.8	9.266	3.394
optfinalrdrp_46844082_uff_E=682.67	-7.8	10.006	5.372
optfinalrdrp_56924747_uff_E=515.53	-7.7	8.742	6.125
optfinalrdrp_73331345_uff_E=668.75	-7.7	0	0
optfinalrdrp_73331060_uff_E=634.29	-7.7	0	0
optfinalrdrp_73330766_uff_E=651.99	-7.7	0	0
optfinalrdrp_73330764_uff_E=710.57	-7.7	0	0
optfinalrdrp_13735050_uff_E=749.67	-7.7	0	0
optfinalrdrp_13735050_uff_E=749.67	-7.7	5.894	3.175
optfinalrdrp_56924747_uff_E=515.53	-7.7	11.572	9.018
optfinalrdrp_73331060_uff_E=634.29	-7.7	0	0
optfinalrdrp_73330764_uff_E=710.57	-7.7	0	0
optfinalrdrp_46844082_uff_E=682.67	-7.7	9.12	3.768
optfinalrdrp_46844082_uff_E=682.67	-7.7	6.64	2.382
optfinalrdrp_13735050_uff_E=749.67	-7.7	0	0
optfinalrdrp_118254216_uff_E=633.63	-7.6	9.285	2.978
optfinalrdrp_118254145_uff_E=558.28	-7.6	0	0
optfinalrdrp_118254142_uff_E=558.28	-7.6	0	0
optfinalrdrp_73331487_uff_E=640.93	-7.6	0	0
optfinalrdrp_73331487_uff_E=640.93	-7.6	9.905	5.945
optfinalrdrp_73331348_uff_E=633.58	-7.6	0	0
optfinalrdrp_73331347_uff_E=651.09	-7.6	0	0
optfinalrdrp_73331344_uff_E=637.78	-7.6	9.333	3.313
optfinalrdrp_73330764_uff_E=710.57	-7.6	5.006	2.357
optfinalrdrp_118254216_uff_E=633.63	-7.6	9.3	2.997
optfinalrdrp_118254145_uff_E=558.28	-7.6	0	0
optfinalrdrp_118254142_uff_E=558.28	-7.6	0	0
optfinalrdrp_73331345_uff_E=668.75	-7.6	0	0
optfinalrdrp_73330764_uff_E=710.57	-7.6	4.944	2.337
optfinalrdrp_46844082_uff_E=682.67	-7.6	9.562	3.995
optfinalrdrp_46844082_uff_E=682.67	-7.6	10.59	4.558
optfinalrdrp_13735050_uff_E=749.67	-7.6	5.877	3.177
optfinalrdrp_56924747_uff_E=515.53	-7.5	8.663	6.889
optfinalrdrp_118263241_uff_E=578.46	-7.5	0	0
optfinalrdrp_118254232_uff_E=631.91	-7.5	0	0
optfinalrdrp_118254227_uff_E=641.19	-7.5	0	0
optfinalrdrp_118254151_uff_E=635.34	-7.5	9.406	4.004
optfinalrdrp_73331488_uff_E=637.67	-7.5	0	0
optfinalrdrp_73331487_uff_E=640.93	-7.5	10.863	6.844
optfinalrdrp_73331487_uff_E=640.93	-7.5	8.891	7
optfinalrdrp_73331347_uff_E=651.09	-7.5	6.175	3.177
optfinalrdrp_73331060_uff_E=634.29	-7.5	6.267	4.134
optfinalrdrp_56924747_uff_E=515.53	-7.5	8.58	6.881
optfinalrdrp_56924747_uff_E=515.53	-7.5	1.742	0.731
optfinalrdrp_147116578_uff_E=520.21	-7.5	0	0
optfinalrdrp_118263241_uff_E=578.46	-7.5	0	0
optfinalrdrp_118254232_uff_E=631.91	-7.5	0	0
optfinalrdrp_118254227_uff_E=641.19	-7.5	0	0
optfinalrdrp_73331488_uff_E=637.67	-7.5	0	0
optfinalrdrp_73331488_uff_E=637.67	-7.5	12.545	8.1
optfinalrdrp_73331487_uff_E=640.93	-7.5	6.717	4.754
optfinalrdrp_73331487_uff_E=640.93	-7.5	8.685	6.28
optfinalrdrp_73331348_uff_E=633.58	-7.5	0	0
optfinalrdrp_73331347_uff_E=651.09	-7.5	0	0
optfinalrdrp_73331347_uff_E=651.09	-7.5	6.172	3.175
optfinalrdrp_73331344_uff_E=637.78	-7.5	9.317	3.298
optfinalrdrp_13735050_uff_E=749.67	-7.5	5.423	3.318
optfinalrdrp_147116578_uff_E=520.21	-7.4	0	0
optfinalrdrp_118254246_uff_E=635.83	-7.4	0	0
optfinalrdrp_118254214_uff_E=630.93	-7.4	0	0
optfinalrdrp_118254214_uff_E=630.93	-7.4	9.443	4.985
optfinalrdrp_118254151_uff_E=635.34	-7.4	4.655	3.319
optfinalrdrp_118254131_uff_E=612.52	-7.4	0	0
optfinalrdrp_90958864_uff_E=541.66	-7.4	0	0
optfinalrdrp_73331488_uff_E=637.67	-7.4	8.924	5.811
optfinalrdrp_73331488_uff_E=637.67	-7.4	7.679	5.05
optfinalrdrp_73331348_uff_E=633.58	-7.4	6.485	3.206
optfinalrdrp_73331345_uff_E=668.75	-7.4	6.413	3.055
optfinalrdrp_73331209_uff_E=661.60	-7.4	1.51	1.385
optfinalrdrp_73331205_uff_E=629.44	-7.4	0	0
optfinalrdrp_73331060_uff_E=634.29	-7.4	7.909	3.665
optfinalrdrp_46844082_uff_E=682.67	-7.4	0	0
optfinalrdrp_46844082_uff_E=682.67	-7.4	8.959	4.767
optfinalrdrp_13735050_uff_E=749.67	-7.4	7.076	3.068
optfinalrdrp_13735050_uff_E=749.67	-7.4	5.456	3.353
optfinalrdrp_56924747_uff_E=515.53	-7.4	7.479	5.68
optfinalrdrp_118254246_uff_E=635.83	-7.4	0	0
optfinalrdrp_118254214_uff_E=630.93	-7.4	0	0
optfinalrdrp_118254214_uff_E=630.93	-7.4	9.406	4.953
optfinalrdrp_118254145_uff_E=558.28	-7.4	13.378	10.115
optfinalrdrp_118254131_uff_E=612.52	-7.4	0	0
optfinalrdrp_90958864_uff_E=541.66	-7.4	0	0
optfinalrdrp_75218823_uff_E=527.02	-7.4	0	0
optfinalrdrp_73331488_uff_E=637.67	-7.4	7.654	5.035
optfinalrdrp_73331488_uff_E=637.67	-7.4	8.905	5.847
optfinalrdrp_73331488_uff_E=637.67	-7.4	10.028	6.994
optfinalrdrp_73331487_uff_E=640.93	-7.4	8.768	4.885
optfinalrdrp_73331487_uff_E=640.93	-7.4	9.823	5.891
optfinalrdrp_73331487_uff_E=640.93	-7.4	15.152	11.84
optfinalrdrp_73331348_uff_E=633.58	-7.4	6.49	3.23
optfinalrdrp_73331345_uff_E=668.75	-7.4	6.418	3.067
optfinalrdrp_73331205_uff_E=629.44	-7.4	0	0
optfinalrdrp_73331060_uff_E=634.29	-7.4	6.307	4.133
optfinalrdrp_73330763_uff_E=714.76	-7.4	10.489	5.707
optfinalrdrp_56950846_uff_E=485.31	-7.4	0	0
optfinalrdrp_13735050_uff_E=749.67	-7.4	7.055	3.089
optfinalrdrp_6452395_uff_E=485.14	-7.3	0	0
optfinalrdrp_127053184_uff_E=568.68	-7.3	0	0
optfinalrdrp_56950845_uff_E=553.08	-7.3	0	0
optfinalrdrp_56924747_uff_E=515.53	-7.3	10.519	8.036
optfinalrdrp_144564153_uff_E=641.96	-7.3	0	0
optfinalrdrp_144564153_uff_E=641.96	-7.3	4.521	2.614
optfinalrdrp_118263245_uff_E=614.68	-7.3	0	0
optfinalrdrp_118263244_uff_E=641.96	-7.3	0	0
optfinalrdrp_118263244_uff_E=641.96	-7.3	4.564	2.636
optfinalrdrp_118263237_uff_E=588.21	-7.3	0	0
optfinalrdrp_118254246_uff_E=635.83	-7.3	1.475	1.112
optfinalrdrp_118254232_uff_E=631.91	-7.3	6.169	3.957
optfinalrdrp_118254216_uff_E=633.63	-7.3	4.513	3.095
optfinalrdrp_118254182_uff_E=641.96	-7.3	0	0
optfinalrdrp_118254182_uff_E=641.96	-7.3	4.533	2.63
optfinalrdrp_118254151_uff_E=635.34	-7.3	10.371	5.312
optfinalrdrp_118254151_uff_E=635.34	-7.3	8.526	4.594
optfinalrdrp_118254145_uff_E=558.28	-7.3	13.35	10.145
optfinalrdrp_118254142_uff_E=558.28	-7.3	13.443	10.266
optfinalrdrp_118254083_uff_E=620.90	-7.3	0	0
optfinalrdrp_90958864_uff_E=541.66	-7.3	13.584	10.265
optfinalrdrp_75218823_uff_E=527.02	-7.3	0	0
optfinalrdrp_73331487_uff_E=640.93	-7.3	5.709	3.01
optfinalrdrp_73331487_uff_E=640.93	-7.3	13.422	11.669
optfinalrdrp_73331487_uff_E=640.93	-7.3	8.195	6.425
optfinalrdrp_73331487_uff_E=640.93	-7.3	2.423	1.807
optfinalrdrp_73331346_uff_E=611.27	-7.3	0	0
optfinalrdrp_73331344_uff_E=637.78	-7.3	10.933	5.621
optfinalrdrp_73331209_uff_E=661.60	-7.3	8.821	4.253
optfinalrdrp_73331209_uff_E=661.60	-7.3	2.482	2.012
optfinalrdrp_73331205_uff_E=629.44	-7.3	15.266	11.694
optfinalrdrp_73330766_uff_E=651.99	-7.3	6.892	4.592
optfinalrdrp_73330766_uff_E=651.99	-7.3	8.01	4.427
optfinalrdrp_73330766_uff_E=651.99	-7.3	9.604	3.946
optfinalrdrp_73330764_uff_E=710.57	-7.3	14.471	10.935
optfinalrdrp_73330764_uff_E=710.57	-7.3	7.214	3.703
optfinalrdrp_56950846_uff_E=485.31	-7.3	0	0
optfinalrdrp_46844082_uff_E=682.67	-7.3	6.454	2.74
optfinalrdrp_44139589_uff_E=599.15	-7.3	0	0
optfinalrdrp_44139589_uff_E=599.15	-7.3	7.284	4.401
optfinalrdrp_44139589_uff_E=599.15	-7.3	5.456	2.595
optfinalrdrp_6452395_uff_E=485.14	-7.3	0	0
optfinalrdrp_56924747_uff_E=515.53	-7.3	12.524	10.086
optfinalrdrp_144564153_uff_E=641.96	-7.3	0	0
optfinalrdrp_144564153_uff_E=641.96	-7.3	4.586	2.632
optfinalrdrp_118263245_uff_E=614.68	-7.3	0	0
optfinalrdrp_118263244_uff_E=641.96	-7.3	0	0
optfinalrdrp_118263244_uff_E=641.96	-7.3	4.55	2.62
optfinalrdrp_118263237_uff_E=588.21	-7.3	0	0
optfinalrdrp_118254182_uff_E=641.96	-7.3	0	0
optfinalrdrp_118254182_uff_E=641.96	-7.3	4.635	2.665
optfinalrdrp_118254151_uff_E=635.34	-7.3	9.397	3.961
optfinalrdrp_118254151_uff_E=635.34	-7.3	10.396	5.325
optfinalrdrp_118254151_uff_E=635.34	-7.3	9.047	4.017
optfinalrdrp_118254142_uff_E=558.28	-7.3	13.398	10.133
optfinalrdrp_118254083_uff_E=620.90	-7.3	0	0
optfinalrdrp_73331487_uff_E=640.93	-7.3	8.251	5.711
optfinalrdrp_73331487_uff_E=640.93	-7.3	7.805	5.109
optfinalrdrp_73331349_uff_E=627.67	-7.3	0	0
optfinalrdrp_73331346_uff_E=611.27	-7.3	0	0
optfinalrdrp_73331209_uff_E=661.60	-7.3	2.384	1.999
optfinalrdrp_73331209_uff_E=661.60	-7.3	8.807	4.273
optfinalrdrp_73331205_uff_E=629.44	-7.3	6.753	2.644
optfinalrdrp_73331060_uff_E=634.29	-7.3	7.965	3.667
optfinalrdrp_73330766_uff_E=651.99	-7.3	0	0
optfinalrdrp_73330764_uff_E=710.57	-7.3	14.444	10.903
optfinalrdrp_56950846_uff_E=485.31	-7.3	8.555	4.128
optfinalrdrp_13735050_uff_E=749.67	-7.3	6.896	3.229
optfinalrdrp_161302_uff_E=363.38	-7.2	0	0
optfinalrdrp_56924747_uff_E=515.53	-7.2	7.301	4.984
optfinalrdrp_56924747_uff_E=515.53	-7.2	4.564	2.929
optfinalrdrp_147116578_uff_E=520.21	-7.2	6.279	3.431
optfinalrdrp_144564153_uff_E=641.96	-7.2	9.506	6.13
optfinalrdrp_118263244_uff_E=641.96	-7.2	9.021	5.748
optfinalrdrp_118254246_uff_E=635.83	-7.2	14.023	10.789
optfinalrdrp_118254227_uff_E=641.19	-7.2	16.17	13.727
optfinalrdrp_118254214_uff_E=630.93	-7.2	7.829	3.884
optfinalrdrp_118254182_uff_E=641.96	-7.2	9.064	5.792
optfinalrdrp_118254083_uff_E=620.90	-7.2	6.837	2.638
optfinalrdrp_90958864_uff_E=541.66	-7.2	3.116	2.057
optfinalrdrp_73331491_uff_E=631.59	-7.2	0	0
optfinalrdrp_73331491_uff_E=631.59	-7.2	5.872	3.517
optfinalrdrp_73331490_uff_E=626.42	-7.2	0	0
optfinalrdrp_73331488_uff_E=637.67	-7.2	15.13	13.459
optfinalrdrp_73331488_uff_E=637.67	-7.2	8.478	5.316
optfinalrdrp_73331488_uff_E=637.67	-7.2	9.956	6.764
optfinalrdrp_73331487_uff_E=640.93	-7.2	7.826	5.189
optfinalrdrp_73331349_uff_E=627.67	-7.2	0	0
optfinalrdrp_73331349_uff_E=627.67	-7.2	10.765	7.625
optfinalrdrp_73331348_uff_E=633.58	-7.2	5.982	3.53
optfinalrdrp_73331347_uff_E=651.09	-7.2	11.6	7.179
optfinalrdrp_73331344_uff_E=637.78	-7.2	4.684	3.34
optfinalrdrp_73331208_uff_E=661.17	-7.2	0	0
optfinalrdrp_73331205_uff_E=629.44	-7.2	6.892	2.598
optfinalrdrp_73331060_uff_E=634.29	-7.2	7.087	3.152
optfinalrdrp_73330912_uff_E=647.29	-7.2	0	0
optfinalrdrp_73330912_uff_E=647.29	-7.2	15.758	12.438
optfinalrdrp_73330910_uff_E=648.69	-7.2	0	0
optfinalrdrp_73330910_uff_E=648.69	-7.2	8.78	4.616
optfinalrdrp_73330910_uff_E=648.69	-7.2	7.695	3.117
optfinalrdrp_73330766_uff_E=651.99	-7.2	8.15	3.91
optfinalrdrp_73330762_uff_E=621.15	-7.2	0	0
optfinalrdrp_73330625_uff_E=631.30	-7.2	0	0
optfinalrdrp_56950846_uff_E=485.31	-7.2	8.434	4.08
optfinalrdrp_46844082_uff_E=682.67	-7.2	5.596	2.807
optfinalrdrp_46844082_uff_E=682.67	-7.2	8.644	3.623
optfinalrdrp_46844082_uff_E=682.67	-7.2	6.777	1.644
optfinalrdrp_46844082_uff_E=682.67	-7.2	5.722	2.48
optfinalrdrp_46844082_uff_E=682.67	-7.2	5.543	3.493
optfinalrdrp_13735050_uff_E=749.67	-7.2	7.826	2.197
optfinalrdrp_13735050_uff_E=749.67	-7.2	5.596	3.157
optfinalrdrp_161302_uff_E=363.38	-7.2	0	0
optfinalrdrp_44139589_uff_E=599.15	-7.2	7.902	4.561
optfinalrdrp_127053184_uff_E=568.68	-7.2	0	0
optfinalrdrp_56950845_uff_E=553.08	-7.2	0	0
optfinalrdrp_56924747_uff_E=515.53	-7.2	10.535	8.056
optfinalrdrp_56924747_uff_E=515.53	-7.2	11.647	8.305
optfinalrdrp_56924747_uff_E=515.53	-7.2	4.941	3.351
optfinalrdrp_118263244_uff_E=641.96	-7.2	9.485	6.12
optfinalrdrp_118254246_uff_E=635.83	-7.2	13.963	10.71
optfinalrdrp_118254232_uff_E=631.91	-7.2	6.176	3.962
optfinalrdrp_118254227_uff_E=641.19	-7.2	16.166	13.71
optfinalrdrp_118254227_uff_E=641.19	-7.2	10.608	7.511
optfinalrdrp_118254216_uff_E=633.63	-7.2	4.468	3.107
optfinalrdrp_118254151_uff_E=635.34	-7.2	9.808	4.52
optfinalrdrp_118254083_uff_E=620.90	-7.2	6.856	2.643
optfinalrdrp_73331491_uff_E=631.59	-7.2	0	0
optfinalrdrp_73331491_uff_E=631.59	-7.2	5.973	3.532
optfinalrdrp_73331490_uff_E=626.42	-7.2	0	0
optfinalrdrp_73331488_uff_E=637.67	-7.2	4.364	2.607
optfinalrdrp_73331488_uff_E=637.67	-7.2	8.36	5.256
optfinalrdrp_73331487_uff_E=640.93	-7.2	8.08	4.813
optfinalrdrp_73331349_uff_E=627.67	-7.2	10.713	7.577
optfinalrdrp_73331349_uff_E=627.67	-7.2	6.178	3.193
optfinalrdrp_73331348_uff_E=633.58	-7.2	5.94	3.519
optfinalrdrp_73331346_uff_E=611.27	-7.2	6.275	3.251
optfinalrdrp_73331209_uff_E=661.60	-7.2	9.416	4.977
optfinalrdrp_73331208_uff_E=661.17	-7.2	0	0
optfinalrdrp_73331205_uff_E=629.44	-7.2	15.281	11.694
optfinalrdrp_73331060_uff_E=634.29	-7.2	10.283	6.02
optfinalrdrp_73331060_uff_E=634.29	-7.2	7.165	3.499
optfinalrdrp_73330911_uff_E=636.92	-7.2	0	0
optfinalrdrp_73330910_uff_E=648.69	-7.2	0	0
optfinalrdrp_73330910_uff_E=648.69	-7.2	7.91	4.7
optfinalrdrp_73330910_uff_E=648.69	-7.2	8.506	4.574
optfinalrdrp_73330766_uff_E=651.99	-7.2	6.927	2.957
optfinalrdrp_73330766_uff_E=651.99	-7.2	10.174	5.619
optfinalrdrp_73330763_uff_E=714.76	-7.2	9.034	4.881
optfinalrdrp_73330762_uff_E=621.15	-7.2	0	0
optfinalrdrp_73330625_uff_E=631.30	-7.2	0	0
optfinalrdrp_13735050_uff_E=749.67	-7.2	9.811	4.497
optfinalrdrp_13735050_uff_E=749.67	-7.2	7.71	3.574
optfinalrdrp_56950845_uff_E=553.08	-7.1	9.02	4.035
optfinalrdrp_56924747_uff_E=515.53	-7.1	7.388	4.796
optfinalrdrp_56924747_uff_E=515.53	-7.1	7.267	4.315
optfinalrdrp_123293391_uff_E=636.92	-7.1	0	0
optfinalrdrp_118263246_uff_E=636.92	-7.1	0	0
optfinalrdrp_118254246_uff_E=635.83	-7.1	4.345	3.423
optfinalrdrp_118254246_uff_E=635.83	-7.1	14.098	10.732
optfinalrdrp_118254232_uff_E=631.91	-7.1	7.835	4.038
optfinalrdrp_118254216_uff_E=633.63	-7.1	9.378	3.344
optfinalrdrp_118254216_uff_E=633.63	-7.1	11.021	5.573
optfinalrdrp_118254216_uff_E=633.63	-7.1	8.673	2.469
optfinalrdrp_118254216_uff_E=633.63	-7.1	4.195	3.271
optfinalrdrp_118254214_uff_E=630.93	-7.1	3.914	2.359
optfinalrdrp_118254214_uff_E=630.93	-7.1	9.894	4.723
optfinalrdrp_90958864_uff_E=541.66	-7.1	16.983	14.007
optfinalrdrp_90958864_uff_E=541.66	-7.1	5.165	2.037
optfinalrdrp_75218864_uff_E=499.12	-7.1	0	0
optfinalrdrp_73331490_uff_E=626.42	-7.1	6.232	2.752
optfinalrdrp_73331488_uff_E=637.67	-7.1	7.482	5.017
optfinalrdrp_73331488_uff_E=637.67	-7.1	3.954	2.398
optfinalrdrp_73331349_uff_E=627.67	-7.1	6.17	3.195
optfinalrdrp_73331348_uff_E=633.58	-7.1	6.654	3.138
optfinalrdrp_73331347_uff_E=651.09	-7.1	11.451	7.21
optfinalrdrp_73331347_uff_E=651.09	-7.1	14.844	11.619
optfinalrdrp_73331346_uff_E=611.27	-7.1	6.271	3.254
optfinalrdrp_73331346_uff_E=611.27	-7.1	10.786	7.687
optfinalrdrp_73331345_uff_E=668.75	-7.1	6.676	3.15
optfinalrdrp_73331345_uff_E=668.75	-7.1	6.048	3.622
optfinalrdrp_73331344_uff_E=637.78	-7.1	8.809	3.488
optfinalrdrp_73331208_uff_E=661.17	-7.1	7.808	4.016
optfinalrdrp_73331208_uff_E=661.17	-7.1	7.636	3.348
optfinalrdrp_73330912_uff_E=647.29	-7.1	8.519	3.639
optfinalrdrp_73330912_uff_E=647.29	-7.1	9.936	5.154
optfinalrdrp_73330911_uff_E=636.92	-7.1	0	0
optfinalrdrp_73330910_uff_E=648.69	-7.1	8.646	4.373
optfinalrdrp_73330766_uff_E=651.99	-7.1	8.857	5.138
optfinalrdrp_73330764_uff_E=710.57	-7.1	3.482	2.613
optfinalrdrp_73330763_uff_E=714.76	-7.1	6.006	4.544
optfinalrdrp_73330763_uff_E=714.76	-7.1	10.56	9.257
optfinalrdrp_73330763_uff_E=714.76	-7.1	10.366	5.356
optfinalrdrp_73330625_uff_E=631.30	-7.1	8.936	3.774
optfinalrdrp_46844082_uff_E=682.67	-7.1	7.902	4.489
optfinalrdrp_46844079_uff_E=544.43	-7.1	0	0
optfinalrdrp_13735050_uff_E=749.67	-7.1	6.938	3.342
optfinalrdrp_13735050_uff_E=749.67	-7.1	2.087	1.54
optfinalrdrp_13735050_uff_E=749.67	-7.1	6.942	2.878
optfinalrdrp_44139589_uff_E=599.15	-7.1	4.059	2.932
optfinalrdrp_56950845_uff_E=553.08	-7.1	8.827	4.031
optfinalrdrp_147116578_uff_E=520.21	-7.1	4.041	2.717
optfinalrdrp_147116578_uff_E=520.21	-7.1	6.23	3.469
optfinalrdrp_144564153_uff_E=641.96	-7.1	9.024	5.712
optfinalrdrp_138514334_uff_E=388.58	-7.1	0	0
optfinalrdrp_123293391_uff_E=636.92	-7.1	0	0
optfinalrdrp_118263246_uff_E=636.92	-7.1	0	0
optfinalrdrp_118254246_uff_E=635.83	-7.1	4.372	3.442
optfinalrdrp_118254232_uff_E=631.91	-7.1	7.803	3.996
optfinalrdrp_118254232_uff_E=631.91	-7.1	6.877	3.813
optfinalrdrp_118254232_uff_E=631.91	-7.1	7.204	3.794
optfinalrdrp_118254216_uff_E=633.63	-7.1	9.28	3.382
optfinalrdrp_118254214_uff_E=630.93	-7.1	7.95	4.28
optfinalrdrp_118254214_uff_E=630.93	-7.1	3.933	2.365
optfinalrdrp_118254214_uff_E=630.93	-7.1	9.93	4.753
optfinalrdrp_118254182_uff_E=641.96	-7.1	9.511	6.141
optfinalrdrp_118254151_uff_E=635.34	-7.1	8.476	4.537
optfinalrdrp_118254083_uff_E=620.90	-7.1	6.547	2.985
optfinalrdrp_90958864_uff_E=541.66	-7.1	17.017	14.082
optfinalrdrp_73331491_uff_E=631.59	-7.1	6.827	2.873
optfinalrdrp_73331490_uff_E=626.42	-7.1	6.109	2.796
optfinalrdrp_73331490_uff_E=626.42	-7.1	11.55	6.975
optfinalrdrp_73331488_uff_E=637.67	-7.1	7.218	4.553
optfinalrdrp_73331347_uff_E=651.09	-7.1	11.659	6.918
optfinalrdrp_73331345_uff_E=668.75	-7.1	6.028	3.567
optfinalrdrp_73331344_uff_E=637.78	-7.1	10.912	5.442
optfinalrdrp_73331344_uff_E=637.78	-7.1	4.689	3.374
optfinalrdrp_73331344_uff_E=637.78	-7.1	8.831	3.4
optfinalrdrp_73331344_uff_E=637.78	-7.1	6.459	4.518
optfinalrdrp_73331209_uff_E=661.60	-7.1	8.928	7.376
optfinalrdrp_73331209_uff_E=661.60	-7.1	3.056	2.157
optfinalrdrp_73331208_uff_E=661.17	-7.1	7.826	4.111
optfinalrdrp_73331060_uff_E=634.29	-7.1	7.08	3.112
optfinalrdrp_73330910_uff_E=648.69	-7.1	3.833	3.085
optfinalrdrp_73330766_uff_E=651.99	-7.1	7.011	3.699
optfinalrdrp_73330625_uff_E=631.30	-7.1	8.905	3.748
optfinalrdrp_46844079_uff_E=544.43	-7.1	0	0
optfinalrdrp_46844079_uff_E=544.43	-7.1	1.486	1.168
optfinalrdrp_44566075_uff_E=523.32	-7.1	0	0
optfinalrdrp_13735050_uff_E=749.67	-7.1	7.39	2.251
optfinalrdrp_13735050_uff_E=749.67	-7.1	7.37	4.58
optfinalrdrp_44139589_uff_E=599.15	-7	0	0
optfinalrdrp_6452395_uff_E=485.14	-7	16.007	13.257
optfinalrdrp_138514334_uff_E=388.58	-7	0	0
optfinalrdrp_123846923_uff_E=605.00	-7	0	0
optfinalrdrp_118263269_uff_E=1102.50	-7	0	0
optfinalrdrp_118263241_uff_E=578.46	-7	8.328	2.951
optfinalrdrp_118263241_uff_E=578.46	-7	8.831	3.684
optfinalrdrp_118254232_uff_E=631.91	-7	9.244	4.66
optfinalrdrp_118254232_uff_E=631.91	-7	9.636	5.414
optfinalrdrp_118254227_uff_E=641.19	-7	11.172	6.695
optfinalrdrp_118254214_uff_E=630.93	-7	9.578	4.453
optfinalrdrp_118254151_uff_E=635.34	-7	5.23	2.671
optfinalrdrp_118254131_uff_E=612.52	-7	7.405	3.294
optfinalrdrp_118254121_uff_E=637.58	-7	0	0
optfinalrdrp_118254121_uff_E=637.58	-7	5.825	3.449
optfinalrdrp_118254083_uff_E=620.90	-7	6.568	2.959
optfinalrdrp_118254083_uff_E=620.90	-7	9.887	5.622
optfinalrdrp_75218864_uff_E=499.12	-7	15.486	12.771
optfinalrdrp_75218823_uff_E=527.02	-7	17.076	14.266
optfinalrdrp_73331491_uff_E=631.59	-7	6.67	2.915
optfinalrdrp_73331490_uff_E=626.42	-7	11.525	6.923
optfinalrdrp_73331349_uff_E=627.67	-7	10.729	7.877
optfinalrdrp_73331344_uff_E=637.78	-7	6.346	4.412
optfinalrdrp_73331209_uff_E=661.60	-7	9.329	3.789
optfinalrdrp_73331209_uff_E=661.60	-7	9.167	3.702
optfinalrdrp_73331208_uff_E=661.17	-7	7.778	4.294
optfinalrdrp_73331060_uff_E=634.29	-7	7.233	3.628
optfinalrdrp_73331060_uff_E=634.29	-7	6.927	3.193
optfinalrdrp_73330910_uff_E=648.69	-7	12.303	6.273
optfinalrdrp_73330764_uff_E=710.57	-7	2.249	1.757
optfinalrdrp_73330625_uff_E=631.30	-7	7.985	3.673
optfinalrdrp_56950846_uff_E=485.31	-7	3.883	2.402
optfinalrdrp_44566075_uff_E=523.32	-7	0	0
optfinalrdrp_44139589_uff_E=599.15	-7	7.683	4.956
optfinalrdrp_44139589_uff_E=599.15	-7	7.416	3.113
optfinalrdrp_44139589_uff_E=599.15	-7	6.407	3.997
optfinalrdrp_6452395_uff_E=485.14	-7	16	13.263
optfinalrdrp_56950845_uff_E=553.08	-7	8.592	4.156
optfinalrdrp_44139586_uff_E=530.12	-7	0	0
optfinalrdrp_142550538_uff_E=347.64	-7	0	0
optfinalrdrp_138514334_uff_E=388.58	-7	6.909	3.556
optfinalrdrp_138496616_uff_E=483.72	-7	0	0
optfinalrdrp_123846923_uff_E=605.00	-7	0	0
optfinalrdrp_118263269_uff_E=1102.50	-7	0	0
optfinalrdrp_118263246_uff_E=636.92	-7	9.48	5.861
optfinalrdrp_118263241_uff_E=578.46	-7	8.322	2.942
optfinalrdrp_118263241_uff_E=578.46	-7	8.84	3.642
optfinalrdrp_118254246_uff_E=635.83	-7	13.969	10.547
optfinalrdrp_118254246_uff_E=635.83	-7	3.973	3.116
optfinalrdrp_118254232_uff_E=631.91	-7	9.275	4.682
optfinalrdrp_118254232_uff_E=631.91	-7	7.056	3.521
optfinalrdrp_118254227_uff_E=641.19	-7	9.736	6.918
optfinalrdrp_118254227_uff_E=641.19	-7	11.251	6.741
optfinalrdrp_118254216_uff_E=633.63	-7	10.357	4.99
optfinalrdrp_118254214_uff_E=630.93	-7	3.53	2.367
optfinalrdrp_118254121_uff_E=637.58	-7	0	0
optfinalrdrp_118254121_uff_E=637.58	-7	5.848	3.438
optfinalrdrp_90958864_uff_E=541.66	-7	12.493	9.542
optfinalrdrp_75218864_uff_E=499.12	-7	0	0
optfinalrdrp_75218864_uff_E=499.12	-7	15.297	12.646
optfinalrdrp_75218823_uff_E=527.02	-7	17.102	14.265
optfinalrdrp_73331629_uff_E=624.62	-7	0	0
optfinalrdrp_73331488_uff_E=637.67	-7	8.855	6.339
optfinalrdrp_73331348_uff_E=633.58	-7	6.663	3.116
optfinalrdrp_73331348_uff_E=633.58	-7	10.151	6.662
optfinalrdrp_73331347_uff_E=651.09	-7	14.822	11.639
optfinalrdrp_73331345_uff_E=668.75	-7	6.59	3.168
optfinalrdrp_73331344_uff_E=637.78	-7	9.969	3.824
optfinalrdrp_73331209_uff_E=661.60	-7	9.275	3.763
optfinalrdrp_73331208_uff_E=661.17	-7	4.092	2.767
optfinalrdrp_73331060_uff_E=634.29	-7	8.079	5.455
optfinalrdrp_73331060_uff_E=634.29	-7	6.916	3.156
optfinalrdrp_73330910_uff_E=648.69	-7	6.331	3.456
optfinalrdrp_73330764_uff_E=710.57	-7	2.297	1.807
optfinalrdrp_73330764_uff_E=710.57	-7	7.352	3.723
optfinalrdrp_73330763_uff_E=714.76	-7	5.921	4.038
optfinalrdrp_73330625_uff_E=631.30	-7	8.613	4.929
optfinalrdrp_44139589_uff_E=599.15	-6.9	10.045	5.856
optfinalrdrp_25171849_uff_E=574.34	-6.9	0	0
optfinalrdrp_25171635_uff_E=456.32	-6.9	0	0
optfinalrdrp_137652147_uff_E=534.82	-6.9	0	0
optfinalrdrp_56950845_uff_E=553.08	-6.9	8.254	3
optfinalrdrp_56950845_uff_E=553.08	-6.9	8.532	3.193
optfinalrdrp_44139586_uff_E=530.12	-6.9	0	0
optfinalrdrp_44139586_uff_E=530.12	-6.9	15.804	13.483
optfinalrdrp_147116578_uff_E=520.21	-6.9	8.376	4.722
optfinalrdrp_144564153_uff_E=641.96	-6.9	5.482	2.636
optfinalrdrp_142550538_uff_E=347.64	-6.9	0	0
optfinalrdrp_142550537_uff_E=823.03	-6.9	0	0
optfinalrdrp_138514335_uff_E=406.05	-6.9	0	0
optfinalrdrp_138514334_uff_E=388.58	-6.9	6.871	3.62
optfinalrdrp_138496616_uff_E=483.72	-6.9	0	0
optfinalrdrp_135027778_uff_E=580.27	-6.9	0	0
optfinalrdrp_124024037_uff_E=377.64	-6.9	0	0
optfinalrdrp_123836216_uff_E=631.96	-6.9	0	0
optfinalrdrp_118263246_uff_E=636.92	-6.9	9.222	5.78
optfinalrdrp_118263244_uff_E=641.96	-6.9	5.485	2.635
optfinalrdrp_118263244_uff_E=641.96	-6.9	6.644	2.916
optfinalrdrp_118263228_uff_E=472.25	-6.9	0	0
optfinalrdrp_118254246_uff_E=635.83	-6.9	8.914	5.123
optfinalrdrp_118254246_uff_E=635.83	-6.9	15.064	12.157
optfinalrdrp_118254246_uff_E=635.83	-6.9	7.552	3.653
optfinalrdrp_118254232_uff_E=631.91	-6.9	14.524	11.1
optfinalrdrp_118254227_uff_E=641.19	-6.9	9.325	6.589
optfinalrdrp_118254214_uff_E=630.93	-6.9	3.366	2.285
optfinalrdrp_118254182_uff_E=641.96	-6.9	8.946	5.719
optfinalrdrp_118254182_uff_E=641.96	-6.9	4.259	3.117
optfinalrdrp_118254182_uff_E=641.96	-6.9	5.447	2.558
optfinalrdrp_118254179_uff_E=699.45	-6.9	0	0
optfinalrdrp_118254131_uff_E=612.52	-6.9	5.233	2.953
optfinalrdrp_118254103_uff_E=631.96	-6.9	0	0
optfinalrdrp_118254083_uff_E=620.90	-6.9	6.677	2.511
optfinalrdrp_90958864_uff_E=541.66	-6.9	7.751	4.196
optfinalrdrp_90958864_uff_E=541.66	-6.9	17.269	14.661
optfinalrdrp_75218823_uff_E=527.02	-6.9	5.179	2.211
optfinalrdrp_75218823_uff_E=527.02	-6.9	7.756	4.417
optfinalrdrp_73331491_uff_E=631.59	-6.9	7.591	3.38
optfinalrdrp_73331488_uff_E=637.67	-6.9	18.016	15.541
optfinalrdrp_73331349_uff_E=627.67	-6.9	11.612	7.188
optfinalrdrp_73331349_uff_E=627.67	-6.9	14.843	12.467
optfinalrdrp_73331348_uff_E=633.58	-6.9	6.709	4.116
optfinalrdrp_73331347_uff_E=651.09	-6.9	15.033	13.081
optfinalrdrp_73331347_uff_E=651.09	-6.9	14.048	10.685
optfinalrdrp_73331345_uff_E=668.75	-6.9	6.828	4.202
optfinalrdrp_73331345_uff_E=668.75	-6.9	6.379	3.075
optfinalrdrp_73331209_uff_E=661.60	-6.9	4.785	3.121
optfinalrdrp_73331208_uff_E=661.17	-6.9	9.868	6.536
optfinalrdrp_73331208_uff_E=661.17	-6.9	8.751	5.159
optfinalrdrp_73331208_uff_E=661.17	-6.9	6.737	4.5
optfinalrdrp_73331205_uff_E=629.44	-6.9	11.696	7.673
optfinalrdrp_73330911_uff_E=636.92	-6.9	9.218	5.756
optfinalrdrp_73330910_uff_E=648.69	-6.9	8.469	4.186
optfinalrdrp_73330910_uff_E=648.69	-6.9	15.107	13.517
optfinalrdrp_73330766_uff_E=651.99	-6.9	10.36	5.436
optfinalrdrp_73330766_uff_E=651.99	-6.9	11.107	6.388
optfinalrdrp_73330766_uff_E=651.99	-6.9	8.446	3.013
optfinalrdrp_73330764_uff_E=710.57	-6.9	5.936	2.904
optfinalrdrp_73330764_uff_E=710.57	-6.9	7.05	3.131
optfinalrdrp_73330764_uff_E=710.57	-6.9	5.126	2.696
optfinalrdrp_73330762_uff_E=621.15	-6.9	15.852	13.534
optfinalrdrp_73330625_uff_E=631.30	-6.9	10.952	7.405
optfinalrdrp_46844079_uff_E=544.43	-6.9	10.371	8.006
optfinalrdrp_44566075_uff_E=523.32	-6.9	10.811	7.865
optfinalrdrp_9974417_uff_E=422.04	-6.9	0	0
optfinalrdrp_44139589_uff_E=599.15	-6.9	6.819	4.865
optfinalrdrp_25171849_uff_E=574.34	-6.9	0	0
optfinalrdrp_25171635_uff_E=456.32	-6.9	0	0
optfinalrdrp_137652147_uff_E=534.82	-6.9	0	0
optfinalrdrp_56950845_uff_E=553.08	-6.9	8.778	4.184
optfinalrdrp_56950845_uff_E=553.08	-6.9	8.123	3.042
optfinalrdrp_56950845_uff_E=553.08	-6.9	6.315	4.2
optfinalrdrp_44139586_uff_E=530.12	-6.9	5.544	2.076
optfinalrdrp_44139586_uff_E=530.12	-6.9	15.886	13.525
optfinalrdrp_44139586_uff_E=530.12	-6.9	2.016	1.316
optfinalrdrp_147116578_uff_E=520.21	-6.9	4.691	2.725
optfinalrdrp_147116578_uff_E=520.21	-6.9	6.987	5.159
optfinalrdrp_144564153_uff_E=641.96	-6.9	9.073	5.806
optfinalrdrp_138514335_uff_E=406.05	-6.9	0	0
optfinalrdrp_124024037_uff_E=377.64	-6.9	0	0
optfinalrdrp_123836216_uff_E=631.96	-6.9	0	0
optfinalrdrp_118263244_uff_E=641.96	-6.9	6.571	2.703
optfinalrdrp_118263228_uff_E=472.25	-6.9	0	0
optfinalrdrp_118254246_uff_E=635.83	-6.9	7.167	4.154
optfinalrdrp_118254246_uff_E=635.83	-6.9	6.194	2.973
optfinalrdrp_118254232_uff_E=631.91	-6.9	10.099	6.076
optfinalrdrp_118254232_uff_E=631.91	-6.9	14.481	11.061
optfinalrdrp_118254216_uff_E=633.63	-6.9	6.126	4.115
optfinalrdrp_118254214_uff_E=630.93	-6.9	5.641	3.638
optfinalrdrp_118254182_uff_E=641.96	-6.9	8.973	5.734
optfinalrdrp_118254182_uff_E=641.96	-6.9	5.439	2.639
optfinalrdrp_118254182_uff_E=641.96	-6.9	4.264	3.134
optfinalrdrp_118254179_uff_E=699.45	-6.9	0	0
optfinalrdrp_118254151_uff_E=635.34	-6.9	5.167	2.662
optfinalrdrp_118254145_uff_E=558.28	-6.9	7.159	5.283
optfinalrdrp_118254131_uff_E=612.52	-6.9	7.428	3.36
optfinalrdrp_118254103_uff_E=631.96	-6.9	0	0
optfinalrdrp_118254083_uff_E=620.90	-6.9	9.505	5.069
optfinalrdrp_118254083_uff_E=620.90	-6.9	6.583	2.513
optfinalrdrp_118254083_uff_E=620.90	-6.9	6.97	3.212
optfinalrdrp_75218823_uff_E=527.02	-6.9	7.758	4.459
optfinalrdrp_73331491_uff_E=631.59	-6.9	7.639	3.354
optfinalrdrp_73331349_uff_E=627.67	-6.9	14.767	12.533
optfinalrdrp_73331349_uff_E=627.67	-6.9	8.252	5.107
optfinalrdrp_73331347_uff_E=651.09	-6.9	6.98	5.362
optfinalrdrp_73331346_uff_E=611.27	-6.9	11.76	7.296
optfinalrdrp_73331345_uff_E=668.75	-6.9	10.924	6.9
optfinalrdrp_73331345_uff_E=668.75	-6.9	6.212	3.714
optfinalrdrp_73331345_uff_E=668.75	-6.9	6.418	3.081
optfinalrdrp_73331344_uff_E=637.78	-6.9	6.251	3.352
optfinalrdrp_73331344_uff_E=637.78	-6.9	5.772	3.959
optfinalrdrp_73331208_uff_E=661.17	-6.9	10.52	4.68
optfinalrdrp_73331208_uff_E=661.17	-6.9	12.337	7.329
optfinalrdrp_73331205_uff_E=629.44	-6.9	5.663	3.458
optfinalrdrp_73331060_uff_E=634.29	-6.9	6.958	4.094
optfinalrdrp_73330910_uff_E=648.69	-6.9	14.588	10.82
optfinalrdrp_73330910_uff_E=648.69	-6.9	6.766	3.894
optfinalrdrp_73330766_uff_E=651.99	-6.9	13.343	8.752
optfinalrdrp_73330764_uff_E=710.57	-6.9	6.297	3.119
optfinalrdrp_73330762_uff_E=621.15	-6.9	15.785	13.475
optfinalrdrp_73330762_uff_E=621.15	-6.9	14.606	11.758
optfinalrdrp_73330625_uff_E=631.30	-6.9	10.932	7.392
optfinalrdrp_56950846_uff_E=485.31	-6.9	8.674	3.458
optfinalrdrp_46844079_uff_E=544.43	-6.9	10.178	7.7
optfinalrdrp_46844079_uff_E=544.43	-6.9	6.77	3.105
optfinalrdrp_44566075_uff_E=523.32	-6.9	12.833	11.47
optfinalrdrp_44566075_uff_E=523.32	-6.9	14.908	11.775
optfinalrdrp_5126442_uff_E=412.73	-6.8	0	0
optfinalrdrp_44139589_uff_E=599.15	-6.8	10.981	6.183
optfinalrdrp_44139589_uff_E=599.15	-6.8	6.321	3.36
optfinalrdrp_25171849_uff_E=574.34	-6.8	5.565	2.053
optfinalrdrp_25171849_uff_E=574.34	-6.8	10.592	6.408
optfinalrdrp_25171849_uff_E=574.34	-6.8	14.37	11.838
optfinalrdrp_25171849_uff_E=574.34	-6.8	12.538	10.093
optfinalrdrp_6452395_uff_E=485.14	-6.8	5.832	1.954
optfinalrdrp_137641183_uff_E=530.84	-6.8	0	0
optfinalrdrp_137641183_uff_E=530.84	-6.8	5.745	2.11
optfinalrdrp_56950845_uff_E=553.08	-6.8	6.138	4.028
optfinalrdrp_44139586_uff_E=530.12	-6.8	5.596	2.051
optfinalrdrp_153989287_uff_E=412.33	-6.8	0	0
optfinalrdrp_147116578_uff_E=520.21	-6.8	2.264	2.015
optfinalrdrp_147116578_uff_E=520.21	-6.8	5.742	3.024
optfinalrdrp_144564153_uff_E=641.96	-6.8	4.174	3.063
optfinalrdrp_144564153_uff_E=641.96	-6.8	3.448	2.41
optfinalrdrp_144564153_uff_E=641.96	-6.8	2.136	1.624
optfinalrdrp_144564153_uff_E=641.96	-6.8	5.794	2.702
optfinalrdrp_138490235_uff_E=829.78	-6.8	0	0
optfinalrdrp_137467381_uff_E=489.66	-6.8	0	0
optfinalrdrp_135027778_uff_E=580.27	-6.8	8.958	3.791
optfinalrdrp_135027778_uff_E=580.27	-6.8	9.741	4.611
optfinalrdrp_131964506_uff_E=573.49	-6.8	0	0
optfinalrdrp_123704177_uff_E=624.00	-6.8	0	0
optfinalrdrp_123293391_uff_E=636.92	-6.8	9.267	4.835
optfinalrdrp_123293391_uff_E=636.92	-6.8	9.089	5.594
optfinalrdrp_123214764_uff_E=687.85	-6.8	0	0
optfinalrdrp_118263248_uff_E=603.75	-6.8	0	0
optfinalrdrp_118263247_uff_E=624.00	-6.8	0	0
optfinalrdrp_118263247_uff_E=624.00	-6.8	4.67	2.894
optfinalrdrp_118263246_uff_E=636.92	-6.8	9.302	4.983
optfinalrdrp_118263244_uff_E=641.96	-6.8	4.151	3.118
optfinalrdrp_118263241_uff_E=578.46	-6.8	12.599	9.73
optfinalrdrp_118263241_uff_E=578.46	-6.8	4.245	2.871
optfinalrdrp_118254246_uff_E=635.83	-6.8	5.994	3.506
optfinalrdrp_118254216_uff_E=633.63	-6.8	6.102	4.073
optfinalrdrp_118254216_uff_E=633.63	-6.8	9.917	4.325
optfinalrdrp_118254214_uff_E=630.93	-6.8	11.765	8.673
optfinalrdrp_118254182_uff_E=641.96	-6.8	3.511	2.446
optfinalrdrp_118254151_uff_E=635.34	-6.8	14.603	9.087
optfinalrdrp_118254145_uff_E=558.28	-6.8	5.617	3.186
optfinalrdrp_118254142_uff_E=558.28	-6.8	5.536	3.148
optfinalrdrp_118254142_uff_E=558.28	-6.8	6.089	3.946
optfinalrdrp_118254142_uff_E=558.28	-6.8	7.313	2.307
optfinalrdrp_118254121_uff_E=637.58	-6.8	6.305	2.736
optfinalrdrp_118254121_uff_E=637.58	-6.8	5.867	3.181
optfinalrdrp_118254083_uff_E=620.90	-6.8	6.842	3.156
optfinalrdrp_90958864_uff_E=541.66	-6.8	7.821	3.785
optfinalrdrp_90958864_uff_E=541.66	-6.8	2.22	1.437
optfinalrdrp_75218825_uff_E=478.84	-6.8	0	0
optfinalrdrp_73331629_uff_E=624.62	-6.8	0	0
optfinalrdrp_73331628_uff_E=624.00	-6.8	0	0
optfinalrdrp_73331628_uff_E=624.00	-6.8	4.651	2.926
optfinalrdrp_73331491_uff_E=631.59	-6.8	9.249	4.362
optfinalrdrp_73331490_uff_E=626.42	-6.8	14.855	11.395
optfinalrdrp_73331348_uff_E=633.58	-6.8	14.191	10.908
optfinalrdrp_73331348_uff_E=633.58	-6.8	6.517	3.295
optfinalrdrp_73331347_uff_E=651.09	-6.8	10.638	5.851
optfinalrdrp_73331347_uff_E=651.09	-6.8	6.817	3.994
optfinalrdrp_73331346_uff_E=611.27	-6.8	14.793	12.533
optfinalrdrp_73331345_uff_E=668.75	-6.8	10.337	6.746
optfinalrdrp_73331345_uff_E=668.75	-6.8	6.27	3.826
optfinalrdrp_73331344_uff_E=637.78	-6.8	9.143	3.576
optfinalrdrp_73331344_uff_E=637.78	-6.8	5.812	3.972
optfinalrdrp_73331344_uff_E=637.78	-6.8	10.196	3.947
optfinalrdrp_73331209_uff_E=661.60	-6.8	9.322	7.08
optfinalrdrp_73331208_uff_E=661.17	-6.8	8.956	5.628
optfinalrdrp_73331205_uff_E=629.44	-6.8	10.374	5.811
optfinalrdrp_73331060_uff_E=634.29	-6.8	7.392	4.816
optfinalrdrp_73331060_uff_E=634.29	-6.8	9.491	5.103
optfinalrdrp_73331060_uff_E=634.29	-6.8	7.573	3.012
optfinalrdrp_73330912_uff_E=647.29	-6.8	8.818	5.152
optfinalrdrp_73330911_uff_E=636.92	-6.8	9.331	5.04
optfinalrdrp_73330763_uff_E=714.76	-6.8	8.327	6.05
optfinalrdrp_73330625_uff_E=631.30	-6.8	9.496	6.083
optfinalrdrp_73330625_uff_E=631.30	-6.8	8.038	3.012
optfinalrdrp_56950846_uff_E=485.31	-6.8	8.528	3.431
optfinalrdrp_46844079_uff_E=544.43	-6.8	7.674	3.682
optfinalrdrp_46844079_uff_E=544.43	-6.8	2.869	2.299
optfinalrdrp_46844079_uff_E=544.43	-6.8	5.563	2.262
optfinalrdrp_44566075_uff_E=523.32	-6.8	14.931	11.765
optfinalrdrp_611918_uff_E=475.46	-6.8	0	0
optfinalrdrp_5126442_uff_E=412.73	-6.8	0	0
optfinalrdrp_25171849_uff_E=574.34	-6.8	5.611	2.082
optfinalrdrp_6452395_uff_E=485.14	-6.8	5.802	2.018
optfinalrdrp_56950845_uff_E=553.08	-6.8	7.354	5.583
optfinalrdrp_144564153_uff_E=641.96	-6.8	5.597	2.747
optfinalrdrp_144564153_uff_E=641.96	-6.8	3.502	2.444
optfinalrdrp_142550537_uff_E=823.03	-6.8	0	0
optfinalrdrp_142550537_uff_E=823.03	-6.8	7.076	3.467
optfinalrdrp_142550537_uff_E=823.03	-6.8	7.169	3.676
optfinalrdrp_142550537_uff_E=823.03	-6.8	13.771	11.186
optfinalrdrp_142550537_uff_E=823.03	-6.8	2.152	1.828
optfinalrdrp_138514334_uff_E=388.58	-6.8	7.527	3.717
optfinalrdrp_138490235_uff_E=829.78	-6.8	0	0
optfinalrdrp_137467381_uff_E=489.66	-6.8	0	0
optfinalrdrp_135027778_uff_E=580.27	-6.8	0	0
optfinalrdrp_135027778_uff_E=580.27	-6.8	9.701	4.9
optfinalrdrp_131964506_uff_E=573.49	-6.8	0	0
optfinalrdrp_131964492_uff_E=498.10	-6.8	0	0
optfinalrdrp_123704177_uff_E=624.00	-6.8	0	0
optfinalrdrp_123704177_uff_E=624.00	-6.8	4.638	2.91
optfinalrdrp_123293391_uff_E=636.92	-6.8	9.492	5.944
optfinalrdrp_123214764_uff_E=687.85	-6.8	0	0
optfinalrdrp_118263248_uff_E=603.75	-6.8	0	0
optfinalrdrp_118263247_uff_E=624.00	-6.8	0	0
optfinalrdrp_118263246_uff_E=636.92	-6.8	9.331	4.883
optfinalrdrp_118263244_uff_E=641.96	-6.8	1.994	1.498
optfinalrdrp_118263244_uff_E=641.96	-6.8	3.438	2.461
optfinalrdrp_118254246_uff_E=635.83	-6.8	6.628	3.57
optfinalrdrp_118254246_uff_E=635.83	-6.8	5.217	2.325
optfinalrdrp_118254214_uff_E=630.93	-6.8	4.048	3.291
optfinalrdrp_118254214_uff_E=630.93	-6.8	9.555	4.62
optfinalrdrp_118254182_uff_E=641.96	-6.8	6.645	2.772
optfinalrdrp_118254182_uff_E=641.96	-6.8	7.51	3.871
optfinalrdrp_118254151_uff_E=635.34	-6.8	13.731	10.696
optfinalrdrp_118254145_uff_E=558.28	-6.8	5.957	3.895
optfinalrdrp_118254142_uff_E=558.28	-6.8	5.533	3.128
optfinalrdrp_118254142_uff_E=558.28	-6.8	7.331	2.318
optfinalrdrp_118254131_uff_E=612.52	-6.8	5.188	2.923
optfinalrdrp_118254131_uff_E=612.52	-6.8	6.778	4.419
optfinalrdrp_118254131_uff_E=612.52	-6.8	6.714	4.403
optfinalrdrp_118254121_uff_E=637.58	-6.8	8.123	5.158
optfinalrdrp_118254121_uff_E=637.58	-6.8	5.93	3.176
optfinalrdrp_118254083_uff_E=620.90	-6.8	7.626	3.971
optfinalrdrp_118254083_uff_E=620.90	-6.8	9.869	5.631
optfinalrdrp_90958864_uff_E=541.66	-6.8	7.569	4.272
optfinalrdrp_75218825_uff_E=478.84	-6.8	0	0
optfinalrdrp_75218823_uff_E=527.02	-6.8	12.649	9.564
optfinalrdrp_73331629_uff_E=624.62	-6.8	13.845	11.068
optfinalrdrp_73331628_uff_E=624.00	-6.8	0	0
optfinalrdrp_73331491_uff_E=631.59	-6.8	9.143	4.256
optfinalrdrp_73331348_uff_E=633.58	-6.8	6.703	4.108
optfinalrdrp_73331348_uff_E=633.58	-6.8	14.066	10.797
optfinalrdrp_73331347_uff_E=651.09	-6.8	10.649	5.92
optfinalrdrp_73331345_uff_E=668.75	-6.8	3.767	2.501
optfinalrdrp_73331208_uff_E=661.17	-6.8	4.356	2.338
optfinalrdrp_73331208_uff_E=661.17	-6.8	11.195	5.981
optfinalrdrp_73331205_uff_E=629.44	-6.8	6.794	4.079
optfinalrdrp_73331205_uff_E=629.44	-6.8	6.481	4.136
optfinalrdrp_73330910_uff_E=648.69	-6.8	6.007	3.392
optfinalrdrp_73330910_uff_E=648.69	-6.8	5.596	3.813
optfinalrdrp_73330766_uff_E=651.99	-6.8	12.128	6.202
optfinalrdrp_73330764_uff_E=710.57	-6.8	6.597	2.76
optfinalrdrp_73330763_uff_E=714.76	-6.8	8.047	5.744
optfinalrdrp_73330762_uff_E=621.15	-6.8	12.995	10.321
optfinalrdrp_73330625_uff_E=631.30	-6.8	7.937	2.846
optfinalrdrp_56950846_uff_E=485.31	-6.8	9.094	4.6
optfinalrdrp_46844079_uff_E=544.43	-6.8	2.719	2.278
optfinalrdrp_611918_uff_E=475.46	-6.8	0	0
optfinalrdrp_44139589_uff_E=599.15	-6.7	7.886	4.54
optfinalrdrp_44139589_uff_E=599.15	-6.7	5.815	3.035
optfinalrdrp_25171849_uff_E=574.34	-6.7	2.123	1.021
optfinalrdrp_25171849_uff_E=574.34	-6.7	12.929	9.088
optfinalrdrp_137641183_uff_E=530.84	-6.7	5.635	3.063
optfinalrdrp_137641183_uff_E=530.84	-6.7	5.749	2.518
optfinalrdrp_127053184_uff_E=568.68	-6.7	3.571	2.194
optfinalrdrp_56950845_uff_E=553.08	-6.7	8.989	3.212
optfinalrdrp_44566078_uff_E=549.87	-6.7	0	0
optfinalrdrp_44139586_uff_E=530.12	-6.7	7.125	2.911
optfinalrdrp_44139586_uff_E=530.12	-6.7	6.266	2.457
optfinalrdrp_44139586_uff_E=530.12	-6.7	7.044	2.619
optfinalrdrp_153989287_uff_E=412.33	-6.7	14.032	11.464
optfinalrdrp_144564153_uff_E=641.96	-6.7	2.988	2.333
optfinalrdrp_142550538_uff_E=347.64	-6.7	6.156	3.13
optfinalrdrp_142550537_uff_E=823.03	-6.7	7.219	3.593
optfinalrdrp_142550537_uff_E=823.03	-6.7	1.972	1.525
optfinalrdrp_138514336_uff_E=331.78	-6.7	0	0
optfinalrdrp_138514336_uff_E=331.78	-6.7	5.203	2.165
optfinalrdrp_135027778_uff_E=580.27	-6.7	10.665	6.827
optfinalrdrp_135027778_uff_E=580.27	-6.7	7.576	3.436
optfinalrdrp_135027778_uff_E=580.27	-6.7	6.719	3.875
optfinalrdrp_131975182_uff_E=561.17	-6.7	0	0
optfinalrdrp_131975182_uff_E=561.17	-6.7	7.547	3.471
optfinalrdrp_131975182_uff_E=561.17	-6.7	3.005	2.313
optfinalrdrp_131964492_uff_E=498.10	-6.7	0	0
optfinalrdrp_123825667_uff_E=368.14	-6.7	0	0
optfinalrdrp_123704177_uff_E=624.00	-6.7	4.672	2.918
optfinalrdrp_123293391_uff_E=636.92	-6.7	3.372	2.238
optfinalrdrp_123293391_uff_E=636.92	-6.7	4.677	2.523
optfinalrdrp_123293391_uff_E=636.92	-6.7	3.051	2.159
optfinalrdrp_123282608_uff_E=523.14	-6.7	0	0
optfinalrdrp_118263272_uff_E=1079.99	-6.7	0	0
optfinalrdrp_118263250_uff_E=523.14	-6.7	0	0
optfinalrdrp_118263246_uff_E=636.92	-6.7	4.57	2.52
optfinalrdrp_118263244_uff_E=641.96	-6.7	7.518	3.859
optfinalrdrp_118263244_uff_E=641.96	-6.7	7.151	3.737
optfinalrdrp_118263243_uff_E=326.16	-6.7	0	0
optfinalrdrp_118263241_uff_E=578.46	-6.7	8.202	6.836
optfinalrdrp_118263237_uff_E=588.21	-6.7	7.473	2.655
optfinalrdrp_118263228_uff_E=472.25	-6.7	4.699	2.699
optfinalrdrp_118254232_uff_E=631.91	-6.7	9.876	5.876
optfinalrdrp_118254232_uff_E=631.91	-6.7	7.783	3.649
optfinalrdrp_118254232_uff_E=631.91	-6.7	6.677	4.186
optfinalrdrp_118254227_uff_E=641.19	-6.7	10.576	7.392
optfinalrdrp_118254219_uff_E=599.83	-6.7	0	0
optfinalrdrp_118254214_uff_E=630.93	-6.7	4.4	2.764
optfinalrdrp_118254145_uff_E=558.28	-6.7	3.574	2.449
optfinalrdrp_118254145_uff_E=558.28	-6.7	4.661	2.643
optfinalrdrp_118254145_uff_E=558.28	-6.7	7.286	2.254
optfinalrdrp_118254145_uff_E=558.28	-6.7	6.741	3.447
optfinalrdrp_118254142_uff_E=558.28	-6.7	3.626	2.489
optfinalrdrp_118254142_uff_E=558.28	-6.7	6.662	3.365
optfinalrdrp_118254131_uff_E=612.52	-6.7	6.751	4.35
optfinalrdrp_118254131_uff_E=612.52	-6.7	6.739	4.344
optfinalrdrp_118254121_uff_E=637.58	-6.7	6.731	4.497
optfinalrdrp_118254121_uff_E=637.58	-6.7	8.213	5.261
optfinalrdrp_118254099_uff_E=523.14	-6.7	0	0
optfinalrdrp_118254083_uff_E=620.90	-6.7	6.908	4.055
optfinalrdrp_118254083_uff_E=620.90	-6.7	5.844	2.835
optfinalrdrp_118218025_uff_E=467.72	-6.7	0	0
optfinalrdrp_75218864_uff_E=499.12	-6.7	6.277	3.206
optfinalrdrp_75218825_uff_E=478.84	-6.7	15.854	13.1
optfinalrdrp_75218824_uff_E=483.43	-6.7	0	0
optfinalrdrp_75218823_uff_E=527.02	-6.7	16.842	14.383
optfinalrdrp_75218823_uff_E=527.02	-6.7	7.808	3.938
optfinalrdrp_75218823_uff_E=527.02	-6.7	9.802	6.746
optfinalrdrp_75218801_uff_E=494.49	-6.7	0	0
optfinalrdrp_74426566_uff_E=467.72	-6.7	0	0
optfinalrdrp_73331491_uff_E=631.59	-6.7	6.619	2.891
optfinalrdrp_73331491_uff_E=631.59	-6.7	9.734	5.193
optfinalrdrp_73331490_uff_E=626.42	-6.7	11.626	7.117
optfinalrdrp_73331346_uff_E=611.27	-6.7	8.489	5.032
optfinalrdrp_73331346_uff_E=611.27	-6.7	10.015	6.269
optfinalrdrp_73331345_uff_E=668.75	-6.7	14.052	10.799
optfinalrdrp_73331208_uff_E=661.17	-6.7	8.225	4.852
optfinalrdrp_73331205_uff_E=629.44	-6.7	4.887	2.965
optfinalrdrp_73330911_uff_E=636.92	-6.7	3.256	2.198
optfinalrdrp_73330911_uff_E=636.92	-6.7	3.511	2.38
optfinalrdrp_73330911_uff_E=636.92	-6.7	4.616	2.513
optfinalrdrp_73330910_uff_E=648.69	-6.7	7.2	3.585
optfinalrdrp_73330763_uff_E=714.76	-6.7	6.156	4.26
optfinalrdrp_73330763_uff_E=714.76	-6.7	10.8	7.978
optfinalrdrp_73330762_uff_E=621.15	-6.7	14.04	11.948
optfinalrdrp_73330762_uff_E=621.15	-6.7	14.716	10.751
optfinalrdrp_56950846_uff_E=485.31	-6.7	8.358	3.432
optfinalrdrp_56950846_uff_E=485.31	-6.7	6.468	4.46
optfinalrdrp_46844079_uff_E=544.43	-6.7	6.236	3.162
optfinalrdrp_44566075_uff_E=523.32	-6.7	12.802	10.97
optfinalrdrp_44566068_uff_E=401.62	-6.7	0	0
optfinalrdrp_44139587_uff_E=1748.94	-6.7	0	0
optfinalrdrp_14737140_uff_E=464.56	-6.7	0	0
optfinalrdrp_574586_uff_E=496.46	-6.7	0	0
optfinalrdrp_586839_uff_E=882.59	-6.7	0	0
optfinalrdrp_9974417_uff_E=422.04	-6.7	5.941	1.777
optfinalrdrp_25171849_uff_E=574.34	-6.7	10.743	6.988
optfinalrdrp_127053184_uff_E=568.68	-6.7	9.543	7.837
optfinalrdrp_44566078_uff_E=549.87	-6.7	0	0
optfinalrdrp_44139586_uff_E=530.12	-6.7	11.518	7.923
optfinalrdrp_44139586_uff_E=530.12	-6.7	5.531	2.36
optfinalrdrp_44139586_uff_E=530.12	-6.7	7.299	3.053
optfinalrdrp_44139586_uff_E=530.12	-6.7	7.129	2.66
optfinalrdrp_147116578_uff_E=520.21	-6.7	2.616	2.083
optfinalrdrp_144564153_uff_E=641.96	-6.7	3.387	2.197
optfinalrdrp_144564153_uff_E=641.96	-6.7	4.289	3.075
optfinalrdrp_144564153_uff_E=641.96	-6.7	1.994	1.582
optfinalrdrp_142550538_uff_E=347.64	-6.7	6.166	3.114
optfinalrdrp_142550537_uff_E=823.03	-6.7	2.724	2.389
optfinalrdrp_142550537_uff_E=823.03	-6.7	5.191	3.282
optfinalrdrp_142550537_uff_E=823.03	-6.7	7.43	3.232
optfinalrdrp_135027778_uff_E=580.27	-6.7	11.171	7.815
optfinalrdrp_135027778_uff_E=580.27	-6.7	6.68	3.811
optfinalrdrp_131975184_uff_E=547.56	-6.7	0	0
optfinalrdrp_131975182_uff_E=561.17	-6.7	0	0
optfinalrdrp_123825667_uff_E=368.14	-6.7	0	0
optfinalrdrp_123293391_uff_E=636.92	-6.7	9.389	5.093
optfinalrdrp_123293391_uff_E=636.92	-6.7	3.316	2.261
optfinalrdrp_123293391_uff_E=636.92	-6.7	4.514	2.495
optfinalrdrp_123282608_uff_E=523.14	-6.7	0	0
optfinalrdrp_118263272_uff_E=1079.99	-6.7	0	0
optfinalrdrp_118263250_uff_E=523.14	-6.7	0	0
optfinalrdrp_118263246_uff_E=636.92	-6.7	4.657	2.52
optfinalrdrp_118263246_uff_E=636.92	-6.7	3.144	2.147
optfinalrdrp_118263244_uff_E=641.96	-6.7	4.307	3.243
optfinalrdrp_118263243_uff_E=326.16	-6.7	0	0
optfinalrdrp_118263237_uff_E=588.21	-6.7	7.437	2.566
optfinalrdrp_118254219_uff_E=599.83	-6.7	0	0
optfinalrdrp_118254216_uff_E=633.63	-6.7	5.8	3.792
optfinalrdrp_118254216_uff_E=633.63	-6.7	8.802	2.577
optfinalrdrp_118254216_uff_E=633.63	-6.7	3.809	3.086
optfinalrdrp_118254182_uff_E=641.96	-6.7	7.244	3.805
optfinalrdrp_118254145_uff_E=558.28	-6.7	1.931	1.431
optfinalrdrp_118254142_uff_E=558.28	-6.7	1.965	1.414
optfinalrdrp_118254142_uff_E=558.28	-6.7	5.257	2.701
optfinalrdrp_118254131_uff_E=612.52	-6.7	7.88	3.052
optfinalrdrp_118254121_uff_E=637.58	-6.7	6.299	2.735
optfinalrdrp_118254121_uff_E=637.58	-6.7	6.903	4.703
optfinalrdrp_118254121_uff_E=637.58	-6.7	11.391	7.147
optfinalrdrp_118254099_uff_E=523.14	-6.7	0	0
optfinalrdrp_118254083_uff_E=620.90	-6.7	6.907	4.028
optfinalrdrp_118218025_uff_E=467.72	-6.7	0	0
optfinalrdrp_90958864_uff_E=541.66	-6.7	12.648	9.314
optfinalrdrp_90958864_uff_E=541.66	-6.7	7.128	3.479
optfinalrdrp_90958864_uff_E=541.66	-6.7	9.736	7.283
optfinalrdrp_90958864_uff_E=541.66	-6.7	5.011	2.051
optfinalrdrp_90958864_uff_E=541.66	-6.7	9.802	6.508
optfinalrdrp_75218825_uff_E=478.84	-6.7	15.864	13.128
optfinalrdrp_75218824_uff_E=483.43	-6.7	0	0
optfinalrdrp_75218823_uff_E=527.02	-6.7	2.2	1.646
optfinalrdrp_75218823_uff_E=527.02	-6.7	7.84	3.98
optfinalrdrp_75218823_uff_E=527.02	-6.7	9.892	6.727
optfinalrdrp_75218823_uff_E=527.02	-6.7	16.746	14.264
optfinalrdrp_75218801_uff_E=494.49	-6.7	0	0
optfinalrdrp_74426566_uff_E=467.72	-6.7	0	0
optfinalrdrp_73331629_uff_E=624.62	-6.7	15.208	12.042
optfinalrdrp_73331628_uff_E=624.00	-6.7	4.767	2.948
optfinalrdrp_73331628_uff_E=624.00	-6.7	10.126	6.571
optfinalrdrp_73331347_uff_E=651.09	-6.7	8.714	4.498
optfinalrdrp_73331346_uff_E=611.27	-6.7	10.014	6.287
optfinalrdrp_73331346_uff_E=611.27	-6.7	14.67	12.555
optfinalrdrp_73331346_uff_E=611.27	-6.7	12.668	8.427
optfinalrdrp_73331345_uff_E=668.75	-6.7	11.968	8.649
optfinalrdrp_73331208_uff_E=661.17	-6.7	9.005	3.397
optfinalrdrp_73331208_uff_E=661.17	-6.7	6.235	4.853
optfinalrdrp_73331205_uff_E=629.44	-6.7	6.793	4.058
optfinalrdrp_73330911_uff_E=636.92	-6.7	4.552	2.5
optfinalrdrp_73330911_uff_E=636.92	-6.7	9.23	4.962
optfinalrdrp_73330766_uff_E=651.99	-6.7	7.621	2.844
optfinalrdrp_73330766_uff_E=651.99	-6.7	2.686	2.213
optfinalrdrp_73330766_uff_E=651.99	-6.7	11.339	8.908
optfinalrdrp_73330764_uff_E=710.57	-6.7	5.899	2.401
optfinalrdrp_73330764_uff_E=710.57	-6.7	13.718	9.602
optfinalrdrp_73330763_uff_E=714.76	-6.7	6.425	3.817
optfinalrdrp_73330762_uff_E=621.15	-6.7	14.997	13.126
optfinalrdrp_73330762_uff_E=621.15	-6.7	14.033	11.955
optfinalrdrp_73330762_uff_E=621.15	-6.7	6.612	2.418
optfinalrdrp_73330762_uff_E=621.15	-6.7	13.678	10.198
optfinalrdrp_70658189_uff_E=385.06	-6.7	0	0
optfinalrdrp_56950846_uff_E=485.31	-6.7	6.415	4.363
optfinalrdrp_46844079_uff_E=544.43	-6.7	7.397	3.425
optfinalrdrp_46844079_uff_E=544.43	-6.7	7.669	3.735
optfinalrdrp_46844079_uff_E=544.43	-6.7	15.042	11.979
optfinalrdrp_44566075_uff_E=523.32	-6.7	13.716	10.608
optfinalrdrp_44566068_uff_E=401.62	-6.7	0	0
optfinalrdrp_44139587_uff_E=1748.94	-6.7	0	0
optfinalrdrp_14737140_uff_E=464.56	-6.7	0	0
optfinalrdrp_574586_uff_E=496.46	-6.7	0	0
optfinalrdrp_586839_uff_E=882.59	-6.7	0	0
optfinalrdrp_71317160_uff_E=364.50	-6.6	0	0
optfinalrdrp_9974417_uff_E=422.04	-6.6	0	0
optfinalrdrp_44139468_uff_E=480.55	-6.6	0	0
optfinalrdrp_44566031_uff_E=562.36	-6.6	0	0
optfinalrdrp_44139589_uff_E=599.15	-6.6	6.174	3.16
optfinalrdrp_44139589_uff_E=599.15	-6.6	7.191	4.139
optfinalrdrp_44139589_uff_E=599.15	-6.6	9.648	6.159
optfinalrdrp_25171849_uff_E=574.34	-6.6	12.953	7.892
optfinalrdrp_25171849_uff_E=574.34	-6.6	13.151	10.016
optfinalrdrp_25171635_uff_E=456.32	-6.6	13.173	11.084
optfinalrdrp_25171635_uff_E=456.32	-6.6	12.346	8.094
optfinalrdrp_6452395_uff_E=485.14	-6.6	5.037	2.782
optfinalrdrp_137641183_uff_E=530.84	-6.6	6.204	3.428
optfinalrdrp_127053184_uff_E=568.68	-6.6	6.041	3.488
optfinalrdrp_127053184_uff_E=568.68	-6.6	15.016	12.259
optfinalrdrp_127053184_uff_E=568.68	-6.6	6.98	4.186
optfinalrdrp_56950845_uff_E=553.08	-6.6	3.897	2.779
optfinalrdrp_44139586_uff_E=530.12	-6.6	5.612	2.344
optfinalrdrp_44139586_uff_E=530.12	-6.6	17.005	14.14
optfinalrdrp_44139586_uff_E=530.12	-6.6	5.277	2.414
optfinalrdrp_147116578_uff_E=520.21	-6.6	7.171	3.488
optfinalrdrp_147116578_uff_E=520.21	-6.6	8.671	4.141
optfinalrdrp_144564145_uff_E=652.83	-6.6	0	0
optfinalrdrp_142550537_uff_E=823.03	-6.6	15.762	13.194
optfinalrdrp_142550537_uff_E=823.03	-6.6	2.667	2.344
optfinalrdrp_138514465_uff_E=385.97	-6.6	0	0
optfinalrdrp_138514335_uff_E=406.05	-6.6	4.458	2.938
optfinalrdrp_138514334_uff_E=388.58	-6.6	7.415	3.642
optfinalrdrp_138490235_uff_E=829.78	-6.6	14.684	11.902
optfinalrdrp_135027778_uff_E=580.27	-6.6	11.186	7.701
optfinalrdrp_135027778_uff_E=580.27	-6.6	8.892	3.779
optfinalrdrp_131975184_uff_E=547.56	-6.6	0	0
optfinalrdrp_131964506_uff_E=573.49	-6.6	8.887	5.12
optfinalrdrp_131964506_uff_E=573.49	-6.6	12.749	10.804
optfinalrdrp_131964506_uff_E=573.49	-6.6	8.883	6.326
optfinalrdrp_131964506_uff_E=573.49	-6.6	9.06	6.533
optfinalrdrp_124024037_uff_E=377.64	-6.6	4.483	2.748
optfinalrdrp_123846923_uff_E=605.00	-6.6	7.188	3.521
optfinalrdrp_123836216_uff_E=631.96	-6.6	6.551	3.398
optfinalrdrp_123836216_uff_E=631.96	-6.6	9.428	6.906
optfinalrdrp_123836216_uff_E=631.96	-6.6	5.968	3.062
optfinalrdrp_123704177_uff_E=624.00	-6.6	10.158	6.616
optfinalrdrp_123282608_uff_E=523.14	-6.6	8.927	3.246
optfinalrdrp_118267073_uff_E=557.12	-6.6	0	0
optfinalrdrp_118263268_uff_E=1104.59	-6.6	0	0
optfinalrdrp_118263264_uff_E=1066.87	-6.6	0	0
optfinalrdrp_118263264_uff_E=1066.87	-6.6	16.287	13.394
optfinalrdrp_118263246_uff_E=636.92	-6.6	9.346	5.898
optfinalrdrp_118263245_uff_E=614.68	-6.6	7.132	2.436
optfinalrdrp_118263244_uff_E=641.96	-6.6	2.858	2.154
optfinalrdrp_118263231_uff_E=574.80	-6.6	0	0
optfinalrdrp_118254227_uff_E=641.19	-6.6	4.601	3.118
optfinalrdrp_118254182_uff_E=641.96	-6.6	3.351	2.246
optfinalrdrp_118254145_uff_E=558.28	-6.6	4.744	2.581
optfinalrdrp_118254142_uff_E=558.28	-6.6	4.738	2.564
optfinalrdrp_118254142_uff_E=558.28	-6.6	8.772	3.495
optfinalrdrp_118254131_uff_E=612.52	-6.6	5.829	4.008
optfinalrdrp_118254121_uff_E=637.58	-6.6	12.68	9.485
optfinalrdrp_118254103_uff_E=631.96	-6.6	9.547	7.158
optfinalrdrp_118254103_uff_E=631.96	-6.6	6.636	3.45
optfinalrdrp_118254083_uff_E=620.90	-6.6	7.059	4.14
optfinalrdrp_118218025_uff_E=467.72	-6.6	3.45	1.956
optfinalrdrp_89798228_uff_E=373.07	-6.6	0	0
optfinalrdrp_75218864_uff_E=499.12	-6.6	5.494	4.349
optfinalrdrp_75218864_uff_E=499.12	-6.6	14.552	12.172
optfinalrdrp_75218847_uff_E=520.97	-6.6	0	0
optfinalrdrp_75218825_uff_E=478.84	-6.6	14.785	12.622
optfinalrdrp_75218825_uff_E=478.84	-6.6	6.178	2.984
optfinalrdrp_75218823_uff_E=527.02	-6.6	7.137	3.339
optfinalrdrp_74426566_uff_E=467.72	-6.6	3.429	1.946
optfinalrdrp_73331629_uff_E=624.62	-6.6	13.612	10.88
optfinalrdrp_73331629_uff_E=624.62	-6.6	15.144	12.347
optfinalrdrp_73331628_uff_E=624.00	-6.6	10.004	6.488
optfinalrdrp_73331491_uff_E=631.59	-6.6	6.739	2.601
optfinalrdrp_73331491_uff_E=631.59	-6.6	10.184	5.98
optfinalrdrp_73331349_uff_E=627.67	-6.6	10.05	6.284
optfinalrdrp_73331348_uff_E=633.58	-6.6	6.465	3.047
optfinalrdrp_73331348_uff_E=633.58	-6.6	7.194	2.983
optfinalrdrp_73331346_uff_E=611.27	-6.6	16.24	12.612
optfinalrdrp_73331205_uff_E=629.44	-6.6	10.187	5.859
optfinalrdrp_73330912_uff_E=647.29	-6.6	9.99	6.601
optfinalrdrp_73330912_uff_E=647.29	-6.6	7.742	5.113
optfinalrdrp_73330912_uff_E=647.29	-6.6	4.902	3.693
optfinalrdrp_73330910_uff_E=648.69	-6.6	8.688	5.495
optfinalrdrp_73330762_uff_E=621.15	-6.6	13.727	10.226
optfinalrdrp_73330762_uff_E=621.15	-6.6	15.263	11.821
optfinalrdrp_73330762_uff_E=621.15	-6.6	13.275	10.458
optfinalrdrp_73330625_uff_E=631.30	-6.6	10.682	5.313
optfinalrdrp_71737790_uff_E=419.80	-6.6	0	0
optfinalrdrp_70658189_uff_E=385.06	-6.6	0	0
optfinalrdrp_56950846_uff_E=485.31	-6.6	3.537	2.317
optfinalrdrp_56950846_uff_E=485.31	-6.6	2.992	2.455
optfinalrdrp_56950846_uff_E=485.31	-6.6	9.076	4.666
optfinalrdrp_46844079_uff_E=544.43	-6.6	6.816	3.12
optfinalrdrp_46844079_uff_E=544.43	-6.6	6.285	3.618
optfinalrdrp_46844079_uff_E=544.43	-6.6	7.973	5.481
optfinalrdrp_44566075_uff_E=523.32	-6.6	12.276	9.813
optfinalrdrp_44566075_uff_E=523.32	-6.6	13.77	10.68
optfinalrdrp_44566075_uff_E=523.32	-6.6	13.245	9.7
optfinalrdrp_44139587_uff_E=1748.94	-6.6	7.809	2.384
optfinalrdrp_611918_uff_E=475.46	-6.6	4.402	2.515
optfinalrdrp_617713_uff_E=360.61	-6.6	0	0
optfinalrdrp_71317160_uff_E=364.50	-6.6	0	0
optfinalrdrp_44139468_uff_E=480.55	-6.6	0	0
optfinalrdrp_44566031_uff_E=562.36	-6.6	0	0
optfinalrdrp_25171849_uff_E=574.34	-6.6	13.565	9.907
optfinalrdrp_25171849_uff_E=574.34	-6.6	10.165	6.918
optfinalrdrp_25171849_uff_E=574.34	-6.6	13.073	9.09
optfinalrdrp_25171635_uff_E=456.32	-6.6	13.201	11.109
optfinalrdrp_25171635_uff_E=456.32	-6.6	11.102	8.449
optfinalrdrp_6452395_uff_E=485.14	-6.6	5.041	2.784
optfinalrdrp_127053184_uff_E=568.68	-6.6	6.019	3.47
optfinalrdrp_127053184_uff_E=568.68	-6.6	6.886	4.102
optfinalrdrp_127053184_uff_E=568.68	-6.6	14.999	12.248
optfinalrdrp_127053184_uff_E=568.68	-6.6	5.238	2.905
optfinalrdrp_56950845_uff_E=553.08	-6.6	8.224	3.855
optfinalrdrp_56950845_uff_E=553.08	-6.6	8.405	5.559
optfinalrdrp_44139590_uff_E=680.31	-6.6	0	0
optfinalrdrp_44139586_uff_E=530.12	-6.6	5.069	2.408
optfinalrdrp_144564145_uff_E=652.83	-6.6	0	0
optfinalrdrp_138514465_uff_E=385.97	-6.6	0	0
optfinalrdrp_138514336_uff_E=331.78	-6.6	0	0
optfinalrdrp_138514336_uff_E=331.78	-6.6	5.304	2.126
optfinalrdrp_138490235_uff_E=829.78	-6.6	14.598	11.862
optfinalrdrp_131975184_uff_E=547.56	-6.6	7.152	2.819
optfinalrdrp_131964506_uff_E=573.49	-6.6	9.049	5.262
optfinalrdrp_131964506_uff_E=573.49	-6.6	8.864	6.96
optfinalrdrp_131964492_uff_E=498.10	-6.6	2.245	1.722
optfinalrdrp_123846923_uff_E=605.00	-6.6	7.175	3.516
optfinalrdrp_123836216_uff_E=631.96	-6.6	6.643	3.428
optfinalrdrp_123836216_uff_E=631.96	-6.6	9.744	7.217
optfinalrdrp_123836216_uff_E=631.96	-6.6	9.456	7.011
optfinalrdrp_123836216_uff_E=631.96	-6.6	5.878	3.088
optfinalrdrp_123704177_uff_E=624.00	-6.6	9.923	6.489
optfinalrdrp_123282608_uff_E=523.14	-6.6	8.932	3.248
optfinalrdrp_118267131_uff_E=382.54	-6.6	0	0
optfinalrdrp_118267073_uff_E=557.12	-6.6	0	0
optfinalrdrp_118263268_uff_E=1104.59	-6.6	0	0
optfinalrdrp_118263250_uff_E=523.14	-6.6	8.901	3.245
optfinalrdrp_118263247_uff_E=624.00	-6.6	10.029	6.508
optfinalrdrp_118263246_uff_E=636.92	-6.6	9.316	5.709
optfinalrdrp_118263245_uff_E=614.68	-6.6	7.144	2.454
optfinalrdrp_118263244_uff_E=641.96	-6.6	7.245	3.808
optfinalrdrp_118263237_uff_E=588.21	-6.6	8.579	4.885
optfinalrdrp_118263231_uff_E=574.80	-6.6	0	0
optfinalrdrp_118263228_uff_E=472.25	-6.6	4.613	2.625
optfinalrdrp_118254227_uff_E=641.19	-6.6	10.64	6.805
optfinalrdrp_118254227_uff_E=641.19	-6.6	4.686	3.126
optfinalrdrp_118254227_uff_E=641.19	-6.6	9.56	5.511
optfinalrdrp_118254179_uff_E=699.45	-6.6	7.05	3.498
optfinalrdrp_118254145_uff_E=558.28	-6.6	8.706	3.452
optfinalrdrp_118254145_uff_E=558.28	-6.6	4.724	2.538
optfinalrdrp_118254121_uff_E=637.58	-6.6	6.449	2.547
optfinalrdrp_118254121_uff_E=637.58	-6.6	12.727	9.555
optfinalrdrp_118254103_uff_E=631.96	-6.6	6.664	3.485
optfinalrdrp_118254103_uff_E=631.96	-6.6	9.193	6.688
optfinalrdrp_118218025_uff_E=467.72	-6.6	3.456	1.95
optfinalrdrp_75218825_uff_E=478.84	-6.6	14.789	12.627
optfinalrdrp_75218823_uff_E=527.02	-6.6	10.181	7.877
optfinalrdrp_74426566_uff_E=467.72	-6.6	3.388	1.944
optfinalrdrp_74426566_uff_E=467.72	-6.6	15.772	13.479
optfinalrdrp_73331629_uff_E=624.62	-6.6	14.158	11.68
optfinalrdrp_73331491_uff_E=631.59	-6.6	6.449	2.648
optfinalrdrp_73331491_uff_E=631.59	-6.6	14.273	10.649
optfinalrdrp_73331349_uff_E=627.67	-6.6	15.896	12.611
optfinalrdrp_73331348_uff_E=633.58	-6.6	11.312	7.105
optfinalrdrp_73331348_uff_E=633.58	-6.6	9.067	6.281
optfinalrdrp_73331347_uff_E=651.09	-6.6	14.968	13.055
optfinalrdrp_73331205_uff_E=629.44	-6.6	10.227	5.887
optfinalrdrp_73331205_uff_E=629.44	-6.6	5.06	2.616
optfinalrdrp_73330912_uff_E=647.29	-6.6	0	0
optfinalrdrp_73330911_uff_E=636.92	-6.6	8.88	4.316
optfinalrdrp_73330911_uff_E=636.92	-6.6	8.969	5.567
optfinalrdrp_73330763_uff_E=714.76	-6.6	9.221	4.083
optfinalrdrp_73330762_uff_E=621.15	-6.6	13.329	10.535
optfinalrdrp_73330625_uff_E=631.30	-6.6	13.652	9.516
optfinalrdrp_73330625_uff_E=631.30	-6.6	5.631	4.517
optfinalrdrp_70870984_uff_E=487.13	-6.6	0	0
optfinalrdrp_56950846_uff_E=485.31	-6.6	9.574	5.82
optfinalrdrp_56950846_uff_E=485.31	-6.6	8.025	5.538
optfinalrdrp_46844079_uff_E=544.43	-6.6	6.568	4.139
optfinalrdrp_44566075_uff_E=523.32	-6.6	14.755	12.145
optfinalrdrp_44139587_uff_E=1748.94	-6.6	7.832	2.37
optfinalrdrp_611918_uff_E=475.46	-6.6	4.421	2.582
optfinalrdrp_611918_uff_E=475.46	-6.6	5.988	1.928
optfinalrdrp_617713_uff_E=360.61	-6.6	0	0
optfinalrdrp_71317160_uff_E=364.50	-6.5	5.795	2.198
optfinalrdrp_9974417_uff_E=422.04	-6.5	3.758	1.829
optfinalrdrp_46844024_uff_E=467.06	-6.5	0	0
optfinalrdrp_25172057_uff_E=459.89	-6.5	0	0
optfinalrdrp_25172057_uff_E=459.89	-6.5	14.002	12.765
optfinalrdrp_5126442_uff_E=412.73	-6.5	6.123	1.996
optfinalrdrp_44566031_uff_E=562.36	-6.5	6.278	2.445
optfinalrdrp_44566031_uff_E=562.36	-6.5	5.208	2.625
optfinalrdrp_25171635_uff_E=456.32	-6.5	13.771	12.205
optfinalrdrp_25171635_uff_E=456.32	-6.5	12.919	9.318
optfinalrdrp_15086460_uff_E=467.63	-6.5	0	0
optfinalrdrp_195521_uff_E=426.42	-6.5	0	0
optfinalrdrp_137641183_uff_E=530.84	-6.5	15.504	12.759
optfinalrdrp_137641183_uff_E=530.84	-6.5	12.752	8.286
optfinalrdrp_127053184_uff_E=568.68	-6.5	5.219	2.904
optfinalrdrp_127053184_uff_E=568.68	-6.5	7.909	5.221
optfinalrdrp_57393956_uff_E=482.31	-6.5	0	0
optfinalrdrp_56950845_uff_E=553.08	-6.5	15.158	13.792
optfinalrdrp_56950845_uff_E=553.08	-6.5	3.711	2.309
optfinalrdrp_56924745_uff_E=399.54	-6.5	0	0
optfinalrdrp_44139590_uff_E=680.31	-6.5	0	0
optfinalrdrp_44139590_uff_E=680.31	-6.5	7.628	2.626
optfinalrdrp_153989287_uff_E=412.33	-6.5	10.351	8.592
optfinalrdrp_153989287_uff_E=412.33	-6.5	14.427	11.989
optfinalrdrp_153989287_uff_E=412.33	-6.5	13.755	12
optfinalrdrp_147116578_uff_E=520.21	-6.5	2.534	1.972
optfinalrdrp_144564145_uff_E=652.83	-6.5	9.023	6.714
optfinalrdrp_144564145_uff_E=652.83	-6.5	6.858	2.474
optfinalrdrp_142550537_uff_E=823.03	-6.5	11.237	7.986
optfinalrdrp_142550537_uff_E=823.03	-6.5	7.167	3.34
optfinalrdrp_138514463_uff_E=391.15	-6.5	0	0
optfinalrdrp_138514336_uff_E=331.78	-6.5	14.644	12.812
optfinalrdrp_138514335_uff_E=406.05	-6.5	5.584	2.145
optfinalrdrp_137467381_uff_E=489.66	-6.5	13.302	9.43
optfinalrdrp_135027778_uff_E=580.27	-6.5	8.286	3.321
optfinalrdrp_131975184_uff_E=547.56	-6.5	7.22	2.833
optfinalrdrp_131964506_uff_E=573.49	-6.5	8.994	6.972
optfinalrdrp_123836216_uff_E=631.96	-6.5	16.959	14.616
optfinalrdrp_123836216_uff_E=631.96	-6.5	8.307	6.584
optfinalrdrp_123836216_uff_E=631.96	-6.5	7.276	2.916
optfinalrdrp_123836216_uff_E=631.96	-6.5	11.715	9.42
optfinalrdrp_123836216_uff_E=631.96	-6.5	7.224	3.32
optfinalrdrp_123825667_uff_E=368.14	-6.5	5.792	2.344
optfinalrdrp_123704177_uff_E=624.00	-6.5	6.034	3.5
optfinalrdrp_123361815_uff_E=380.82	-6.5	0	0
optfinalrdrp_123293391_uff_E=636.92	-6.5	6.167	3.868
optfinalrdrp_123282608_uff_E=523.14	-6.5	8.849	3.083
optfinalrdrp_123282608_uff_E=523.14	-6.5	8.865	3.587
optfinalrdrp_123282608_uff_E=523.14	-6.5	8.217	2.938
optfinalrdrp_118267131_uff_E=382.54	-6.5	0	0
optfinalrdrp_118267131_uff_E=382.54	-6.5	4.399	2.496
optfinalrdrp_118267131_uff_E=382.54	-6.5	5.831	2.107
optfinalrdrp_118267073_uff_E=557.12	-6.5	5.23	2.561
optfinalrdrp_118267052_uff_E=464.23	-6.5	0	0
optfinalrdrp_118267046_uff_E=447.92	-6.5	0	0
optfinalrdrp_118267045_uff_E=475.47	-6.5	0	0
optfinalrdrp_118263272_uff_E=1079.99	-6.5	13.894	11.555
optfinalrdrp_118263269_uff_E=1102.50	-6.5	7.999	3.181
optfinalrdrp_118263269_uff_E=1102.50	-6.5	7.127	2.721
optfinalrdrp_118263269_uff_E=1102.50	-6.5	4.772	3.109
optfinalrdrp_118263264_uff_E=1066.87	-6.5	14.253	11.898
optfinalrdrp_118263250_uff_E=523.14	-6.5	8.859	3.09
optfinalrdrp_118263250_uff_E=523.14	-6.5	9.395	3.564
optfinalrdrp_118263250_uff_E=523.14	-6.5	8.172	2.979
optfinalrdrp_118263247_uff_E=624.00	-6.5	5.722	3.179
optfinalrdrp_118263246_uff_E=636.92	-6.5	3.383	2.279
optfinalrdrp_118263241_uff_E=578.46	-6.5	9.349	6.486
optfinalrdrp_118263241_uff_E=578.46	-6.5	11.862	6.799
optfinalrdrp_118263237_uff_E=588.21	-6.5	8.426	4.747
optfinalrdrp_118263237_uff_E=588.21	-6.5	7.996	3.286
optfinalrdrp_118263233_uff_E=562.91	-6.5	0	0
optfinalrdrp_118263228_uff_E=472.25	-6.5	11.485	9.351
optfinalrdrp_118263228_uff_E=472.25	-6.5	4.913	2.878
optfinalrdrp_118254227_uff_E=641.19	-6.5	9.566	5.475
optfinalrdrp_118254227_uff_E=641.19	-6.5	17.252	14.622
optfinalrdrp_118254227_uff_E=641.19	-6.5	5.737	4.023
optfinalrdrp_118254213_uff_E=644.51	-6.5	0	0
optfinalrdrp_118254213_uff_E=644.51	-6.5	5.594	3.015
optfinalrdrp_118254190_uff_E=511.99	-6.5	0	0
optfinalrdrp_118254182_uff_E=641.96	-6.5	4.813	2.535
optfinalrdrp_118254179_uff_E=699.45	-6.5	7.051	3.494
optfinalrdrp_118254179_uff_E=699.45	-6.5	11.664	7.226
optfinalrdrp_118254145_uff_E=558.28	-6.5	14.135	10.677
optfinalrdrp_118254131_uff_E=612.52	-6.5	7.837	3.097
optfinalrdrp_118254131_uff_E=612.52	-6.5	6.981	4.024
optfinalrdrp_118254131_uff_E=612.52	-6.5	10.624	5.414
optfinalrdrp_118254121_uff_E=637.58	-6.5	8.704	6.866
optfinalrdrp_118254121_uff_E=637.58	-6.5	11.357	7.102
optfinalrdrp_118254103_uff_E=631.96	-6.5	8.262	6.547
optfinalrdrp_118254103_uff_E=631.96	-6.5	5.892	3.072
optfinalrdrp_118254103_uff_E=631.96	-6.5	16.902	14.593
optfinalrdrp_118254103_uff_E=631.96	-6.5	5.732	2.991
optfinalrdrp_118254099_uff_E=523.14	-6.5	8.925	3.082
optfinalrdrp_118254099_uff_E=523.14	-6.5	8.221	2.963
optfinalrdrp_118218025_uff_E=467.72	-6.5	16.001	13.222
optfinalrdrp_75218864_uff_E=499.12	-6.5	7.009	3.955
optfinalrdrp_75218864_uff_E=499.12	-6.5	3.557	2.906
optfinalrdrp_75218824_uff_E=483.43	-6.5	15.795	12.983
optfinalrdrp_75218823_uff_E=527.02	-6.5	11.63	9.151
optfinalrdrp_75218801_uff_E=494.49	-6.5	4.629	3.163
optfinalrdrp_74426566_uff_E=467.72	-6.5	16.015	13.278
optfinalrdrp_73331629_uff_E=624.62	-6.5	14.106	11.983
optfinalrdrp_73331628_uff_E=624.00	-6.5	5.881	3.397
optfinalrdrp_73331628_uff_E=624.00	-6.5	9.744	5.662
optfinalrdrp_73331490_uff_E=626.42	-6.5	15.049	11.807
optfinalrdrp_73331490_uff_E=626.42	-6.5	6.319	3.81
optfinalrdrp_73331490_uff_E=626.42	-6.5	8.447	3.488
optfinalrdrp_73331490_uff_E=626.42	-6.5	14.337	10.851
optfinalrdrp_73331349_uff_E=627.67	-6.5	16.946	14.135
optfinalrdrp_73331349_uff_E=627.67	-6.5	16.246	12.586
optfinalrdrp_73331346_uff_E=611.27	-6.5	9.423	6.513
optfinalrdrp_73331346_uff_E=611.27	-6.5	4.456	2.626
optfinalrdrp_73331205_uff_E=629.44	-6.5	9.447	6.149
optfinalrdrp_73331205_uff_E=629.44	-6.5	6.36	3.944
optfinalrdrp_73330912_uff_E=647.29	-6.5	9.762	6.367
optfinalrdrp_73330763_uff_E=714.76	-6.5	8.517	5.85
optfinalrdrp_73330762_uff_E=621.15	-6.5	11.131	7.542
optfinalrdrp_73330762_uff_E=621.15	-6.5	12.196	9.319
optfinalrdrp_73330625_uff_E=631.30	-6.5	8.028	5.825
optfinalrdrp_73330625_uff_E=631.30	-6.5	6.267	4.02
optfinalrdrp_70658189_uff_E=385.06	-6.5	16.162	13.815
optfinalrdrp_46844022_uff_E=503.08	-6.5	0	0
optfinalrdrp_46843963_uff_E=502.61	-6.5	0	0
optfinalrdrp_44566075_uff_E=523.32	-6.5	14.318	12.115
optfinalrdrp_44566075_uff_E=523.32	-6.5	14.868	11.406
optfinalrdrp_44566051_uff_E=374.99	-6.5	0	0
optfinalrdrp_44139587_uff_E=1748.94	-6.5	3.376	2.013
optfinalrdrp_611918_uff_E=475.46	-6.5	6.046	1.945
optfinalrdrp_566721_uff_E=474.85	-6.5	0	0
optfinalrdrp_586839_uff_E=882.59	-6.5	11.742	8.686
optfinalrdrp_586839_uff_E=882.59	-6.5	16.716	14.274
optfinalrdrp_71317160_uff_E=364.50	-6.5	5.803	2.21
optfinalrdrp_9974417_uff_E=422.04	-6.5	5.839	2.091
optfinalrdrp_46844137_uff_E=493.79	-6.5	0	0
optfinalrdrp_44139468_uff_E=480.55	-6.5	12.619	9.416
optfinalrdrp_25172057_uff_E=459.89	-6.5	0	0
optfinalrdrp_25172057_uff_E=459.89	-6.5	14.058	12.781
optfinalrdrp_5126442_uff_E=412.73	-6.5	6.144	1.993
optfinalrdrp_25171849_uff_E=574.34	-6.5	14.167	11.813
optfinalrdrp_25171849_uff_E=574.34	-6.5	12.607	9.338
optfinalrdrp_25171849_uff_E=574.34	-6.5	13.3	10.197
optfinalrdrp_25171635_uff_E=456.32	-6.5	12.935	9.287
optfinalrdrp_25171635_uff_E=456.32	-6.5	13.77	12.128
optfinalrdrp_15086460_uff_E=467.63	-6.5	0	0
optfinalrdrp_195521_uff_E=426.42	-6.5	0	0
optfinalrdrp_127053185_uff_E=417.22	-6.5	0	0
optfinalrdrp_127053185_uff_E=417.22	-6.5	12.49	9.513
optfinalrdrp_56924745_uff_E=399.54	-6.5	0	0
optfinalrdrp_44139590_uff_E=680.31	-6.5	7.625	2.595
optfinalrdrp_147116578_uff_E=520.21	-6.5	6.959	4.078
optfinalrdrp_147116578_uff_E=520.21	-6.5	2.42	1.955
optfinalrdrp_144564145_uff_E=652.83	-6.5	9.034	6.702
optfinalrdrp_144564145_uff_E=652.83	-6.5	7.819	6.155
optfinalrdrp_144564145_uff_E=652.83	-6.5	6.853	2.462
optfinalrdrp_142550519_uff_E=411.61	-6.5	0	0
optfinalrdrp_138514463_uff_E=391.15	-6.5	0	0
optfinalrdrp_138514335_uff_E=406.05	-6.5	4.553	3.01
optfinalrdrp_138514335_uff_E=406.05	-6.5	5.813	1.871
optfinalrdrp_138514334_uff_E=388.58	-6.5	12.144	9.972
optfinalrdrp_138490235_uff_E=829.78	-6.5	14.169	10.917
optfinalrdrp_137467381_uff_E=489.66	-6.5	13.28	9.423
optfinalrdrp_135027778_uff_E=580.27	-6.5	7.152	2.869
optfinalrdrp_131975184_uff_E=547.56	-6.5	6.943	3.27
optfinalrdrp_131975182_uff_E=561.17	-6.5	2.69	1.692
optfinalrdrp_124024037_uff_E=377.64	-6.5	4.478	2.75
optfinalrdrp_124024037_uff_E=377.64	-6.5	6.265	2.451
optfinalrdrp_123836216_uff_E=631.96	-6.5	7.228	2.813
optfinalrdrp_123836216_uff_E=631.96	-6.5	8.336	6.621
optfinalrdrp_123836216_uff_E=631.96	-6.5	16.963	14.597
optfinalrdrp_123825667_uff_E=368.14	-6.5	5.786	2.315
optfinalrdrp_123704177_uff_E=624.00	-6.5	6.097	3.601
optfinalrdrp_123704177_uff_E=624.00	-6.5	5.592	2.571
optfinalrdrp_123361815_uff_E=380.82	-6.5	0	0
optfinalrdrp_123293391_uff_E=636.92	-6.5	3.653	2.382
optfinalrdrp_123282608_uff_E=523.14	-6.5	8.249	2.935
optfinalrdrp_118267131_uff_E=382.54	-6.5	4.434	2.536
optfinalrdrp_118267073_uff_E=557.12	-6.5	5.208	2.551
optfinalrdrp_118267052_uff_E=464.23	-6.5	0	0
optfinalrdrp_118267046_uff_E=447.92	-6.5	0	0
optfinalrdrp_118267046_uff_E=447.92	-6.5	5.562	2.672
optfinalrdrp_118267045_uff_E=475.47	-6.5	0	0
optfinalrdrp_118263269_uff_E=1102.50	-6.5	7.14	2.73
optfinalrdrp_118263264_uff_E=1066.87	-6.5	0	0
optfinalrdrp_118263250_uff_E=523.14	-6.5	8.871	3.1
optfinalrdrp_118263250_uff_E=523.14	-6.5	8.16	2.981
optfinalrdrp_118263247_uff_E=624.00	-6.5	5.935	3.48
optfinalrdrp_118263244_uff_E=641.96	-6.5	3.083	2.319
optfinalrdrp_118263241_uff_E=578.46	-6.5	7.995	4.782
optfinalrdrp_118263241_uff_E=578.46	-6.5	12.181	8.919
optfinalrdrp_118263241_uff_E=578.46	-6.5	7.921	5.383
optfinalrdrp_118263233_uff_E=562.91	-6.5	0	0
optfinalrdrp_118263228_uff_E=472.25	-6.5	4.97	2.908
optfinalrdrp_118263228_uff_E=472.25	-6.5	11.484	9.336
optfinalrdrp_118254227_uff_E=641.19	-6.5	10.206	6.673
optfinalrdrp_118254213_uff_E=644.51	-6.5	0	0
optfinalrdrp_118254190_uff_E=511.99	-6.5	0	0
optfinalrdrp_118254179_uff_E=699.45	-6.5	5.526	2.415
optfinalrdrp_118254131_uff_E=612.52	-6.5	6.329	4.335
optfinalrdrp_118254103_uff_E=631.96	-6.5	8.286	6.539
optfinalrdrp_118254103_uff_E=631.96	-6.5	7.221	2.809
optfinalrdrp_118254103_uff_E=631.96	-6.5	11.559	9.246
optfinalrdrp_118254103_uff_E=631.96	-6.5	7.189	3.251
optfinalrdrp_118254099_uff_E=523.14	-6.5	8.875	3.113
optfinalrdrp_118254099_uff_E=523.14	-6.5	9.323	3.572
optfinalrdrp_118254099_uff_E=523.14	-6.5	8.183	2.961
optfinalrdrp_118218025_uff_E=467.72	-6.5	16.037	13.214
optfinalrdrp_91564943_uff_E=503.49	-6.5	0	0
optfinalrdrp_75218864_uff_E=499.12	-6.5	6.994	3.933
optfinalrdrp_75218825_uff_E=478.84	-6.5	3.878	2.894
optfinalrdrp_75218824_uff_E=483.43	-6.5	15.811	13.013
optfinalrdrp_75218801_uff_E=494.49	-6.5	4.601	3.145
optfinalrdrp_73331629_uff_E=624.62	-6.5	6.829	2.993
optfinalrdrp_73331629_uff_E=624.62	-6.5	15.836	12.671
optfinalrdrp_73331629_uff_E=624.62	-6.5	15.732	12.283
optfinalrdrp_73331628_uff_E=624.00	-6.5	5.93	3.378
optfinalrdrp_73331491_uff_E=631.59	-6.5	10.44	6.034
optfinalrdrp_73331490_uff_E=626.42	-6.5	8.418	3.475
optfinalrdrp_73331490_uff_E=626.42	-6.5	15.141	11.873
optfinalrdrp_73331349_uff_E=627.67	-6.5	6.706	4.259
optfinalrdrp_73331349_uff_E=627.67	-6.5	16.177	12.525
optfinalrdrp_73331349_uff_E=627.67	-6.5	9.166	6.25
optfinalrdrp_73331346_uff_E=611.27	-6.5	9.36	6.119
optfinalrdrp_73331346_uff_E=611.27	-6.5	9.275	6.454
optfinalrdrp_73331346_uff_E=611.27	-6.5	5.908	2.942
optfinalrdrp_73330912_uff_E=647.29	-6.5	14.013	10.939
optfinalrdrp_73330911_uff_E=636.92	-6.5	9.108	5.696
optfinalrdrp_73330763_uff_E=714.76	-6.5	9.21	3.475
optfinalrdrp_71737790_uff_E=419.80	-6.5	0	0
optfinalrdrp_70870984_uff_E=487.13	-6.5	5.944	2.803
optfinalrdrp_70870984_uff_E=487.13	-6.5	5.632	2.475
optfinalrdrp_70870984_uff_E=487.13	-6.5	7.332	3.588
optfinalrdrp_70870984_uff_E=487.13	-6.5	3.951	2.83
optfinalrdrp_70658189_uff_E=385.06	-6.5	16.192	13.856
optfinalrdrp_56950846_uff_E=485.31	-6.5	3.457	2.391
optfinalrdrp_46843963_uff_E=502.61	-6.5	0	0
optfinalrdrp_46843899_uff_E=466.21	-6.5	0	0
optfinalrdrp_44566075_uff_E=523.32	-6.5	14.026	12.112
optfinalrdrp_44566075_uff_E=523.32	-6.5	13.151	9.586
optfinalrdrp_44566075_uff_E=523.32	-6.5	12.931	9.979
optfinalrdrp_44566051_uff_E=374.99	-6.5	0	0
optfinalrdrp_566721_uff_E=474.85	-6.5	0	0
optfinalrdrp_566721_uff_E=474.85	-6.5	3.474	1.934
optfinalrdrp_586839_uff_E=882.59	-6.5	11.421	8.597
optfinalrdrp_3512_uff_E=436.39	-6.4	0	0
optfinalrdrp_71317160_uff_E=364.50	-6.4	4.18	2.532
optfinalrdrp_25171633_uff_E=466.90	-6.4	0	0
optfinalrdrp_978395_uff_E=436.39	-6.4	0	0
optfinalrdrp_978395_uff_E=436.39	-6.4	4.503	2.572
optfinalrdrp_46844137_uff_E=493.79	-6.4	0	0
optfinalrdrp_46844024_uff_E=467.06	-6.4	12.649	9.79
optfinalrdrp_44139468_uff_E=480.55	-6.4	12.689	9.554
optfinalrdrp_21677661_uff_E=485.34	-6.4	0	0
optfinalrdrp_5702061_uff_E=436.39	-6.4	0	0
optfinalrdrp_118207067_uff_E=773.99	-6.4	0	0
optfinalrdrp_253250_uff_E=428.28	-6.4	0	0
optfinalrdrp_253250_uff_E=428.28	-6.4	4.535	2.686
optfinalrdrp_137641183_uff_E=530.84	-6.4	15.291	12.204
optfinalrdrp_131770040_uff_E=354.57	-6.4	0	0
optfinalrdrp_127053185_uff_E=417.22	-6.4	0	0
optfinalrdrp_127053184_uff_E=568.68	-6.4	6.935	4.342
optfinalrdrp_57397526_uff_E=321.86	-6.4	0	0
optfinalrdrp_57393956_uff_E=482.31	-6.4	1.497	1.28
optfinalrdrp_56924745_uff_E=399.54	-6.4	5.952	2.135
optfinalrdrp_44566076_uff_E=484.63	-6.4	0	0
optfinalrdrp_44139590_uff_E=680.31	-6.4	9.184	3.224
optfinalrdrp_44139590_uff_E=680.31	-6.4	6.266	3.618
optfinalrdrp_10761572_uff_E=428.30	-6.4	0	0
optfinalrdrp_630845_uff_E=373.54	-6.4	0	0
optfinalrdrp_154593892_uff_E=383.60	-6.4	0	0
optfinalrdrp_154593892_uff_E=383.60	-6.4	5.57	2.301
optfinalrdrp_153989287_uff_E=412.33	-6.4	15.662	13.325
optfinalrdrp_147116578_uff_E=520.21	-6.4	7.948	3.207
optfinalrdrp_144564145_uff_E=652.83	-6.4	7.181	3.061
optfinalrdrp_142550537_uff_E=823.03	-6.4	5.558	3.376
optfinalrdrp_142550537_uff_E=823.03	-6.4	7.869	5.106
optfinalrdrp_138514463_uff_E=391.15	-6.4	7.576	4.162
optfinalrdrp_138514336_uff_E=331.78	-6.4	4.152	2.886
optfinalrdrp_138514336_uff_E=331.78	-6.4	11.822	9.557
optfinalrdrp_138514334_uff_E=388.58	-6.4	7.84	4.138
optfinalrdrp_138496616_uff_E=483.72	-6.4	8.005	4.423
optfinalrdrp_138490235_uff_E=829.78	-6.4	13.758	10.81
optfinalrdrp_137467381_uff_E=489.66	-6.4	12.228	9.456
optfinalrdrp_137467367_uff_E=372.94	-6.4	0	0
optfinalrdrp_131975184_uff_E=547.56	-6.4	2.197	1.7
optfinalrdrp_131975182_uff_E=561.17	-6.4	6.999	3.779
optfinalrdrp_131964506_uff_E=573.49	-6.4	8	5.414
optfinalrdrp_131964492_uff_E=498.10	-6.4	13.067	10.976
optfinalrdrp_129010273_uff_E=436.64	-6.4	0	0
optfinalrdrp_129010273_uff_E=436.64	-6.4	4.503	2.562
optfinalrdrp_123704177_uff_E=624.00	-6.4	6.751	3.661
optfinalrdrp_123704177_uff_E=624.00	-6.4	6.594	3.413
optfinalrdrp_123396595_uff_E=400.61	-6.4	0	0
optfinalrdrp_123293391_uff_E=636.92	-6.4	8.636	4.319
optfinalrdrp_118267097_uff_E=473.76	-6.4	0	0
optfinalrdrp_118267052_uff_E=464.23	-6.4	6.237	2.479
optfinalrdrp_118267046_uff_E=447.92	-6.4	5.56	2.695
optfinalrdrp_118263272_uff_E=1079.99	-6.4	6.531	2.781
optfinalrdrp_118263269_uff_E=1102.50	-6.4	6.246	3.734
optfinalrdrp_118263268_uff_E=1104.59	-6.4	9.898	6.033
optfinalrdrp_118263268_uff_E=1104.59	-6.4	6.868	4.476
optfinalrdrp_118263268_uff_E=1104.59	-6.4	6.095	3.509
optfinalrdrp_118263268_uff_E=1104.59	-6.4	8.622	4.047
optfinalrdrp_118263268_uff_E=1104.59	-6.4	10.662	8.254
optfinalrdrp_118263264_uff_E=1066.87	-6.4	16.37	12.959
optfinalrdrp_118263251_uff_E=515.77	-6.4	0	0
optfinalrdrp_118263247_uff_E=624.00	-6.4	6.768	3.605
optfinalrdrp_118263247_uff_E=624.00	-6.4	6.507	3.396
optfinalrdrp_118263246_uff_E=636.92	-6.4	6.212	3.449
optfinalrdrp_118263243_uff_E=326.16	-6.4	5.435	2.529
optfinalrdrp_118263241_uff_E=578.46	-6.4	12.162	7.221
optfinalrdrp_118254219_uff_E=599.83	-6.4	15.805	12.693
optfinalrdrp_118254179_uff_E=699.45	-6.4	5.557	2.47
optfinalrdrp_118254103_uff_E=631.96	-6.4	7.153	3.315
optfinalrdrp_118254103_uff_E=631.96	-6.4	6.32	4.352
optfinalrdrp_118254099_uff_E=523.14	-6.4	9.406	3.443
optfinalrdrp_91035900_uff_E=505.87	-6.4	0	0
optfinalrdrp_75218864_uff_E=499.12	-6.4	5.087	2.377
optfinalrdrp_75218864_uff_E=499.12	-6.4	11.479	9.559
optfinalrdrp_75218847_uff_E=520.97	-6.4	6.415	3.324
optfinalrdrp_75218824_uff_E=483.43	-6.4	6.143	2.774
optfinalrdrp_75218824_uff_E=483.43	-6.4	3.991	2.999
optfinalrdrp_75218824_uff_E=483.43	-6.4	4.905	2.577
optfinalrdrp_75218801_uff_E=494.49	-6.4	6.239	3.025
optfinalrdrp_73331629_uff_E=624.62	-6.4	16.18	13.466
optfinalrdrp_73331629_uff_E=624.62	-6.4	6.84	2.949
optfinalrdrp_73331628_uff_E=624.00	-6.4	6.501	3.384
optfinalrdrp_73331628_uff_E=624.00	-6.4	9.854	5.87
optfinalrdrp_73331628_uff_E=624.00	-6.4	7.143	4.12
optfinalrdrp_73330911_uff_E=636.92	-6.4	6.096	3.38
optfinalrdrp_73330911_uff_E=636.92	-6.4	9.796	5.853
optfinalrdrp_71737790_uff_E=419.80	-6.4	6.378	3.036
optfinalrdrp_70870984_uff_E=487.13	-6.4	0	0
optfinalrdrp_46843961_uff_E=566.24	-6.4	0	0
optfinalrdrp_46843899_uff_E=466.21	-6.4	0	0
optfinalrdrp_46843899_uff_E=466.21	-6.4	12.412	9.154
optfinalrdrp_46843899_uff_E=466.21	-6.4	5.926	2.8
optfinalrdrp_44139587_uff_E=1748.94	-6.4	8.096	4.335
optfinalrdrp_612127_uff_E=488.19	-6.4	0	0
optfinalrdrp_10097_uff_E=554.35	-6.4	0	0
optfinalrdrp_574586_uff_E=496.46	-6.4	6.521	2.322
optfinalrdrp_617268_uff_E=361.47	-6.4	0	0
optfinalrdrp_617713_uff_E=360.61	-6.4	6.483	2.125
optfinalrdrp_3512_uff_E=436.39	-6.4	0	0
optfinalrdrp_71317160_uff_E=364.50	-6.4	4.195	2.545
optfinalrdrp_25171633_uff_E=466.90	-6.4	0	0
optfinalrdrp_978395_uff_E=436.39	-6.4	0	0
optfinalrdrp_978395_uff_E=436.39	-6.4	4.482	2.543
optfinalrdrp_46844137_uff_E=493.79	-6.4	4.621	2.391
optfinalrdrp_46844137_uff_E=493.79	-6.4	9.597	6.925
optfinalrdrp_21677661_uff_E=485.34	-6.4	0	0
optfinalrdrp_5702061_uff_E=436.39	-6.4	0	0
optfinalrdrp_5702061_uff_E=436.39	-6.4	4.502	2.57
optfinalrdrp_5126442_uff_E=412.73	-6.4	4.466	2.655
optfinalrdrp_44566031_uff_E=562.36	-6.4	5.218	2.605
optfinalrdrp_44566031_uff_E=562.36	-6.4	6.229	2.458
optfinalrdrp_25171635_uff_E=456.32	-6.4	7.392	4.44
optfinalrdrp_25171635_uff_E=456.32	-6.4	12.865	8.543
optfinalrdrp_253250_uff_E=428.28	-6.4	0	0
optfinalrdrp_253250_uff_E=428.28	-6.4	4.536	2.696
optfinalrdrp_139588134_uff_E=457.99	-6.4	0	0
optfinalrdrp_127053185_uff_E=417.22	-6.4	5.716	3.076
optfinalrdrp_127053185_uff_E=417.22	-6.4	16.604	13.998
optfinalrdrp_127053184_uff_E=568.68	-6.4	8.138	5.257
optfinalrdrp_127053184_uff_E=568.68	-6.4	3.395	2.21
optfinalrdrp_127053184_uff_E=568.68	-6.4	6.978	4.396
optfinalrdrp_57397526_uff_E=321.86	-6.4	0	0
optfinalrdrp_57397526_uff_E=321.86	-6.4	12.388	10.996
optfinalrdrp_57393956_uff_E=482.31	-6.4	0	0
optfinalrdrp_56924745_uff_E=399.54	-6.4	5.982	2.155
optfinalrdrp_44566076_uff_E=484.63	-6.4	0	0
optfinalrdrp_44139590_uff_E=680.31	-6.4	9.194	3.196
optfinalrdrp_44139590_uff_E=680.31	-6.4	6.305	3.632
optfinalrdrp_44139590_uff_E=680.31	-6.4	7.474	4.133
optfinalrdrp_10761572_uff_E=428.30	-6.4	0	0
optfinalrdrp_154593892_uff_E=383.60	-6.4	0	0
optfinalrdrp_154593892_uff_E=383.60	-6.4	5.582	2.314
optfinalrdrp_147116578_uff_E=520.21	-6.4	7.527	3.674
optfinalrdrp_144564145_uff_E=652.83	-6.4	7.23	3.227
optfinalrdrp_144564145_uff_E=652.83	-6.4	2.163	1.652
optfinalrdrp_142550537_uff_E=823.03	-6.4	7.099	3.513
optfinalrdrp_142550524_uff_E=360.94	-6.4	0	0
optfinalrdrp_142550519_uff_E=411.61	-6.4	4.279	2.744
optfinalrdrp_138514463_uff_E=391.15	-6.4	7.531	4.051
optfinalrdrp_138514336_uff_E=331.78	-6.4	13.584	12.203
optfinalrdrp_138514334_uff_E=388.58	-6.4	4.512	2.827
optfinalrdrp_138514334_uff_E=388.58	-6.4	14.837	13.104
optfinalrdrp_138496616_uff_E=483.72	-6.4	8.103	4.384
optfinalrdrp_138490235_uff_E=829.78	-6.4	13.835	11.333
optfinalrdrp_137467381_uff_E=489.66	-6.4	12.2	9.469
optfinalrdrp_135027778_uff_E=580.27	-6.4	8.575	3.687
optfinalrdrp_135027778_uff_E=580.27	-6.4	9.534	5.751
optfinalrdrp_135027778_uff_E=580.27	-6.4	6.55	2.96
optfinalrdrp_135027778_uff_E=580.27	-6.4	7.513	2.833
optfinalrdrp_131975184_uff_E=547.56	-6.4	5.711	2.428
optfinalrdrp_131964506_uff_E=573.49	-6.4	7.309	4.141
optfinalrdrp_131964506_uff_E=573.49	-6.4	12.508	9.973
optfinalrdrp_131964506_uff_E=573.49	-6.4	8.643	5.738
optfinalrdrp_131964492_uff_E=498.10	-6.4	7.859	5.436
optfinalrdrp_131964492_uff_E=498.10	-6.4	13.418	8.845
optfinalrdrp_129010273_uff_E=436.64	-6.4	0	0
optfinalrdrp_123846923_uff_E=605.00	-6.4	4.137	2.696
optfinalrdrp_123836216_uff_E=631.96	-6.4	7.116	3.216
optfinalrdrp_123825667_uff_E=368.14	-6.4	6.598	2.712
optfinalrdrp_123704177_uff_E=624.00	-6.4	6.596	3.377
optfinalrdrp_123704177_uff_E=624.00	-6.4	9.704	5.639
optfinalrdrp_123704177_uff_E=624.00	-6.4	6.761	3.595
optfinalrdrp_123704177_uff_E=624.00	-6.4	9.899	5.932
optfinalrdrp_123396595_uff_E=400.61	-6.4	0	0
optfinalrdrp_123293391_uff_E=636.92	-6.4	3.974	2.073
optfinalrdrp_123282608_uff_E=523.14	-6.4	6.97	4.767
optfinalrdrp_123282608_uff_E=523.14	-6.4	8.835	3.145
optfinalrdrp_118267131_uff_E=382.54	-6.4	5.915	2.004
optfinalrdrp_118267097_uff_E=473.76	-6.4	0	0
optfinalrdrp_118267096_uff_E=623.75	-6.4	0	0
optfinalrdrp_118267052_uff_E=464.23	-6.4	6.229	2.493
optfinalrdrp_118263272_uff_E=1079.99	-6.4	6.574	2.791
optfinalrdrp_118263269_uff_E=1102.50	-6.4	12.672	8.143
optfinalrdrp_118263268_uff_E=1104.59	-6.4	6.072	3.507
optfinalrdrp_118263268_uff_E=1104.59	-6.4	10.014	6.138
optfinalrdrp_118263268_uff_E=1104.59	-6.4	8.5	4.114
optfinalrdrp_118263264_uff_E=1066.87	-6.4	4.469	2.709
optfinalrdrp_118263264_uff_E=1066.87	-6.4	16.333	13.468
optfinalrdrp_118263264_uff_E=1066.87	-6.4	6.196	2.463
optfinalrdrp_118263251_uff_E=515.77	-6.4	0	0
optfinalrdrp_118263250_uff_E=523.14	-6.4	11.948	5.43
optfinalrdrp_118263247_uff_E=624.00	-6.4	9.783	5.687
optfinalrdrp_118263247_uff_E=624.00	-6.4	6.791	3.628
optfinalrdrp_118263247_uff_E=624.00	-6.4	6.566	3.379
optfinalrdrp_118263246_uff_E=636.92	-6.4	6.115	3.851
optfinalrdrp_118263246_uff_E=636.92	-6.4	7.196	2.929
optfinalrdrp_118263241_uff_E=578.46	-6.4	15.241	12.127
optfinalrdrp_118263237_uff_E=588.21	-6.4	7.988	3.361
optfinalrdrp_118254219_uff_E=599.83	-6.4	15.823	12.702
optfinalrdrp_118254213_uff_E=644.51	-6.4	5.589	2.949
optfinalrdrp_118254179_uff_E=699.45	-6.4	8.068	5.822
optfinalrdrp_118254179_uff_E=699.45	-6.4	10.063	5.826
optfinalrdrp_118254145_uff_E=558.28	-6.4	5.701	3.786
optfinalrdrp_118254145_uff_E=558.28	-6.4	6.733	2.632
optfinalrdrp_118254142_uff_E=558.28	-6.4	4.805	2.558
optfinalrdrp_118254142_uff_E=558.28	-6.4	12.726	10.924
optfinalrdrp_118254131_uff_E=612.52	-6.4	7.459	4.323
optfinalrdrp_118254131_uff_E=612.52	-6.4	6.656	3.832
optfinalrdrp_118254103_uff_E=631.96	-6.4	16.792	14.469
optfinalrdrp_118254103_uff_E=631.96	-6.4	7.451	2.511
optfinalrdrp_118254099_uff_E=523.14	-6.4	8.824	3.515
optfinalrdrp_118207010_uff_E=1815.50	-6.4	0	0
optfinalrdrp_91564943_uff_E=503.49	-6.4	3.803	2.296
optfinalrdrp_91564943_uff_E=503.49	-6.4	15.283	12.772
optfinalrdrp_91564943_uff_E=503.49	-6.4	3.904	2.214
optfinalrdrp_91035900_uff_E=505.87	-6.4	0	0
optfinalrdrp_91035900_uff_E=505.87	-6.4	3.311	1.613
optfinalrdrp_91035900_uff_E=505.87	-6.4	2.088	1.069
optfinalrdrp_75218847_uff_E=520.97	-6.4	0	0
optfinalrdrp_75218824_uff_E=483.43	-6.4	4.873	2.566
optfinalrdrp_75218801_uff_E=494.49	-6.4	6.178	2.973
optfinalrdrp_73331628_uff_E=624.00	-6.4	6.631	3.417
optfinalrdrp_73331628_uff_E=624.00	-6.4	6.8	3.655
optfinalrdrp_73331628_uff_E=624.00	-6.4	9.908	5.94
optfinalrdrp_73331490_uff_E=626.42	-6.4	5.954	3.532
optfinalrdrp_73331490_uff_E=626.42	-6.4	10.629	5.354
optfinalrdrp_73331347_uff_E=651.09	-6.4	9.951	7.358
optfinalrdrp_73330912_uff_E=647.29	-6.4	15.35	11.968
optfinalrdrp_73330911_uff_E=636.92	-6.4	2.875	1.985
optfinalrdrp_73330625_uff_E=631.30	-6.4	11.428	7.788
optfinalrdrp_73330625_uff_E=631.30	-6.4	8.608	2.721
optfinalrdrp_71737790_uff_E=419.80	-6.4	6.375	3.021
optfinalrdrp_70870984_uff_E=487.13	-6.4	13.78	10.906
optfinalrdrp_70870984_uff_E=487.13	-6.4	6.063	2.353
optfinalrdrp_56950844_uff_E=501.37	-6.4	0	0
optfinalrdrp_46843961_uff_E=566.24	-6.4	0	0
optfinalrdrp_46843899_uff_E=466.21	-6.4	12.409	8.912
optfinalrdrp_44566075_uff_E=523.32	-6.4	13.895	11.596
optfinalrdrp_44139587_uff_E=1748.94	-6.4	3.33	1.971
optfinalrdrp_14565581_uff_E=465.26	-6.4	0	0
optfinalrdrp_612127_uff_E=488.19	-6.4	0	0
optfinalrdrp_612127_uff_E=488.19	-6.4	4.83	2.738
optfinalrdrp_10097_uff_E=554.35	-6.4	0	0
optfinalrdrp_574586_uff_E=496.46	-6.4	6.527	2.318
optfinalrdrp_617268_uff_E=361.47	-6.4	0	0
optfinalrdrp_617713_uff_E=360.61	-6.4	6.463	2.132
optfinalrdrp_3512_uff_E=436.39	-6.3	4.492	2.57
optfinalrdrp_3082005_uff_E=446.17	-6.3	0	0
optfinalrdrp_161302_uff_E=363.38	-6.3	17.114	14.994
optfinalrdrp_46844137_uff_E=493.79	-6.3	12.593	9.478
optfinalrdrp_46844024_uff_E=467.06	-6.3	15.882	13.295
optfinalrdrp_5702061_uff_E=436.39	-6.3	4.508	2.572
optfinalrdrp_5126442_uff_E=412.73	-6.3	4.465	2.657
optfinalrdrp_195522_uff_E=471.34	-6.3	0	0
optfinalrdrp_118207067_uff_E=773.99	-6.3	6.652	2.589
optfinalrdrp_56950843_uff_E=482.15	-6.3	0	0
optfinalrdrp_56950842_uff_E=522.07	-6.3	0	0
optfinalrdrp_56950842_uff_E=522.07	-6.3	10.804	8.268
optfinalrdrp_56924746_uff_E=397.29	-6.3	0	0
optfinalrdrp_56924746_uff_E=397.29	-6.3	5.216	2.694
optfinalrdrp_44566031_uff_E=562.36	-6.3	12.761	9
optfinalrdrp_44566031_uff_E=562.36	-6.3	5.443	2.586
optfinalrdrp_44566031_uff_E=562.36	-6.3	10.599	7.53
optfinalrdrp_25171635_uff_E=456.32	-6.3	13.881	11.618
optfinalrdrp_25171635_uff_E=456.32	-6.3	13.29	9.138
optfinalrdrp_25171635_uff_E=456.32	-6.3	14.521	12.182
optfinalrdrp_25171635_uff_E=456.32	-6.3	10.78	7.067
optfinalrdrp_25171632_uff_E=683.46	-6.3	0	0
optfinalrdrp_25171632_uff_E=683.46	-6.3	5.877	2.763
optfinalrdrp_139588134_uff_E=457.99	-6.3	0	0
optfinalrdrp_127053185_uff_E=417.22	-6.3	12.442	9.504
optfinalrdrp_127053185_uff_E=417.22	-6.3	8.153	6.522
optfinalrdrp_57397526_uff_E=321.86	-6.3	12.342	10.945
optfinalrdrp_57395698_uff_E=490.56	-6.3	0	0
optfinalrdrp_57393956_uff_E=482.31	-6.3	7.416	2.346
optfinalrdrp_44566078_uff_E=549.87	-6.3	6.055	3.087
optfinalrdrp_44139590_uff_E=680.31	-6.3	6.627	3.412
optfinalrdrp_10761572_uff_E=428.30	-6.3	4.53	2.704
optfinalrdrp_298140_uff_E=400.18	-6.3	0	0
optfinalrdrp_298140_uff_E=400.18	-6.3	5.428	2.167
optfinalrdrp_31336_uff_E=499.84	-6.3	0	0
optfinalrdrp_153989287_uff_E=412.33	-6.3	15.881	13.286
optfinalrdrp_148240297_uff_E=338.09	-6.3	0	0
optfinalrdrp_144564145_uff_E=652.83	-6.3	8.224	4.093
optfinalrdrp_144564145_uff_E=652.83	-6.3	16.978	14.853
optfinalrdrp_144564145_uff_E=652.83	-6.3	8.783	5.184
optfinalrdrp_144564145_uff_E=652.83	-6.3	6.991	4.985
optfinalrdrp_142550538_uff_E=347.64	-6.3	14.005	12.171
optfinalrdrp_142550524_uff_E=360.94	-6.3	0	0
optfinalrdrp_142550519_uff_E=411.61	-6.3	0	0
optfinalrdrp_138514336_uff_E=331.78	-6.3	6.254	4.1
optfinalrdrp_138514336_uff_E=331.78	-6.3	2.023	1.809
optfinalrdrp_138514335_uff_E=406.05	-6.3	14.356	12.813
optfinalrdrp_138514334_uff_E=388.58	-6.3	14.612	12.878
optfinalrdrp_138496616_uff_E=483.72	-6.3	5.711	3.563
optfinalrdrp_138490235_uff_E=829.78	-6.3	13.131	10.951
optfinalrdrp_138490235_uff_E=829.78	-6.3	13.451	9.95
optfinalrdrp_138490235_uff_E=829.78	-6.3	13.506	10.917
optfinalrdrp_137467447_uff_E=315.96	-6.3	0	0
optfinalrdrp_137467381_uff_E=489.66	-6.3	10.832	7.803
optfinalrdrp_131975184_uff_E=547.56	-6.3	8.147	5.242
optfinalrdrp_131975184_uff_E=547.56	-6.3	14.747	13.282
optfinalrdrp_131975184_uff_E=547.56	-6.3	5.438	2.537
optfinalrdrp_131964506_uff_E=573.49	-6.3	11.463	8.897
optfinalrdrp_131964492_uff_E=498.10	-6.3	9.791	6.602
optfinalrdrp_131964492_uff_E=498.10	-6.3	7.899	5.458
optfinalrdrp_123846923_uff_E=605.00	-6.3	4.182	2.718
optfinalrdrp_123704177_uff_E=624.00	-6.3	9.927	5.92
optfinalrdrp_123704177_uff_E=624.00	-6.3	5.052	2.687
optfinalrdrp_123361815_uff_E=380.82	-6.3	5.853	2.202
optfinalrdrp_123293391_uff_E=636.92	-6.3	5.682	2.759
optfinalrdrp_118267096_uff_E=623.75	-6.3	0	0
optfinalrdrp_118267096_uff_E=623.75	-6.3	5.586	3.087
optfinalrdrp_118267049_uff_E=466.20	-6.3	0	0
optfinalrdrp_118267046_uff_E=447.92	-6.3	4.345	2.575
optfinalrdrp_118267046_uff_E=447.92	-6.3	6.275	3.348
optfinalrdrp_118263272_uff_E=1079.99	-6.3	6.289	2.651
optfinalrdrp_118263269_uff_E=1102.50	-6.3	15.544	12.755
optfinalrdrp_118263269_uff_E=1102.50	-6.3	11.518	8.647
optfinalrdrp_118263268_uff_E=1104.59	-6.3	6.916	5.445
optfinalrdrp_118263264_uff_E=1066.87	-6.3	15.931	13.867
optfinalrdrp_118263251_uff_E=515.77	-6.3	5.378	2.807
optfinalrdrp_118263250_uff_E=523.14	-6.3	7.981	4.76
optfinalrdrp_118263248_uff_E=603.75	-6.3	6.942	3.189
optfinalrdrp_118263247_uff_E=624.00	-6.3	9.86	5.871
optfinalrdrp_118263246_uff_E=636.92	-6.3	9.513	6.394
optfinalrdrp_118263246_uff_E=636.92	-6.3	9.2	5.238
optfinalrdrp_118263245_uff_E=614.68	-6.3	7.828	3.213
optfinalrdrp_118263245_uff_E=614.68	-6.3	5.099	2.99
optfinalrdrp_118263237_uff_E=588.21	-6.3	7.209	2.384
optfinalrdrp_118263237_uff_E=588.21	-6.3	4.838	3.268
optfinalrdrp_118263237_uff_E=588.21	-6.3	9.175	5.958
optfinalrdrp_118263228_uff_E=472.25	-6.3	4.625	2.907
optfinalrdrp_118254213_uff_E=644.51	-6.3	8.081	4.131
optfinalrdrp_118254213_uff_E=644.51	-6.3	7.893	4.261
optfinalrdrp_118254190_uff_E=511.99	-6.3	5.268	2.46
optfinalrdrp_118254179_uff_E=699.45	-6.3	9.7	5.561
optfinalrdrp_118254179_uff_E=699.45	-6.3	6.455	3.259
optfinalrdrp_118254179_uff_E=699.45	-6.3	14.429	11.049
optfinalrdrp_118254099_uff_E=523.14	-6.3	6.973	4.717
optfinalrdrp_118254099_uff_E=523.14	-6.3	2.025	1.834
optfinalrdrp_118207010_uff_E=1815.50	-6.3	0	0
optfinalrdrp_118207010_uff_E=1815.50	-6.3	5.812	2.297
optfinalrdrp_91564943_uff_E=503.49	-6.3	0	0
optfinalrdrp_75218847_uff_E=520.97	-6.3	5.032	2.34
optfinalrdrp_75218801_uff_E=494.49	-6.3	15.6	12.828
optfinalrdrp_73331629_uff_E=624.62	-6.3	13.132	10.302
optfinalrdrp_73331629_uff_E=624.62	-6.3	15.55	12.162
optfinalrdrp_73331628_uff_E=624.00	-6.3	4.998	2.645
optfinalrdrp_73330911_uff_E=636.92	-6.3	9.203	5.282
optfinalrdrp_70870984_uff_E=487.13	-6.3	6.236	2.435
optfinalrdrp_70658189_uff_E=385.06	-6.3	16.034	13.589
optfinalrdrp_57397525_uff_E=364.21	-6.3	0	0
optfinalrdrp_57390407_uff_E=486.36	-6.3	0	0
optfinalrdrp_56950844_uff_E=501.37	-6.3	0	0
optfinalrdrp_46843961_uff_E=566.24	-6.3	6.907	3.799
optfinalrdrp_44566068_uff_E=401.62	-6.3	7.562	3.163
optfinalrdrp_44566051_uff_E=374.99	-6.3	3.823	1.834
optfinalrdrp_44139587_uff_E=1748.94	-6.3	5.839	3.557
optfinalrdrp_44139587_uff_E=1748.94	-6.3	2.17	1.658
optfinalrdrp_25171637_uff_E=456.94	-6.3	0	0
optfinalrdrp_14737140_uff_E=464.56	-6.3	8.629	6.723
optfinalrdrp_14565585_uff_E=471.35	-6.3	0	0
optfinalrdrp_14565585_uff_E=471.35	-6.3	16.42	14.254
optfinalrdrp_14565581_uff_E=465.26	-6.3	0	0
optfinalrdrp_14565581_uff_E=465.26	-6.3	5.753	2.188
optfinalrdrp_612127_uff_E=488.19	-6.3	4.797	2.726
optfinalrdrp_566721_uff_E=474.85	-6.3	7.499	6.547
optfinalrdrp_586858_uff_E=517.53	-6.3	0	0
optfinalrdrp_592609_uff_E=494.95	-6.3	0	0
optfinalrdrp_617268_uff_E=361.47	-6.3	16.311	14.061
optfinalrdrp_617713_uff_E=360.61	-6.3	8.732	4.572
optfinalrdrp_3512_uff_E=436.39	-6.3	4.498	2.577
optfinalrdrp_25171633_uff_E=466.90	-6.3	12.153	8.939
optfinalrdrp_161302_uff_E=363.38	-6.3	17.107	15.015
optfinalrdrp_46844024_uff_E=467.06	-6.3	0	0
optfinalrdrp_21677661_uff_E=485.34	-6.3	6.307	2.291
optfinalrdrp_195522_uff_E=471.34	-6.3	0	0
optfinalrdrp_195522_uff_E=471.34	-6.3	16.322	14.156
optfinalrdrp_195522_uff_E=471.34	-6.3	5.233	2.484
optfinalrdrp_56950842_uff_E=522.07	-6.3	0	0
optfinalrdrp_56924746_uff_E=397.29	-6.3	0	0
optfinalrdrp_44566031_uff_E=562.36	-6.3	5.462	2.657
optfinalrdrp_25171635_uff_E=456.32	-6.3	15.318	12.188
optfinalrdrp_25171635_uff_E=456.32	-6.3	14.56	11.811
optfinalrdrp_25171632_uff_E=683.46	-6.3	0	0
optfinalrdrp_6452395_uff_E=485.14	-6.3	8.805	7.345
optfinalrdrp_137652147_uff_E=534.82	-6.3	6	2.292
optfinalrdrp_57397526_uff_E=321.86	-6.3	6.074	2.755
optfinalrdrp_57395698_uff_E=490.56	-6.3	0	0
optfinalrdrp_44566078_uff_E=549.87	-6.3	6.017	3.105
optfinalrdrp_10761572_uff_E=428.30	-6.3	4.544	2.666
optfinalrdrp_630845_uff_E=373.54	-6.3	0	0
optfinalrdrp_298140_uff_E=400.18	-6.3	0	0
optfinalrdrp_298140_uff_E=400.18	-6.3	5.432	2.154
optfinalrdrp_31336_uff_E=499.84	-6.3	0	0
optfinalrdrp_154593892_uff_E=383.60	-6.3	2.683	2.171
optfinalrdrp_153989287_uff_E=412.33	-6.3	0	0
optfinalrdrp_153989287_uff_E=412.33	-6.3	13.961	10.691
optfinalrdrp_148240297_uff_E=338.09	-6.3	0	0
optfinalrdrp_144564145_uff_E=652.83	-6.3	9.737	7.162
optfinalrdrp_144564145_uff_E=652.83	-6.3	8.776	5.127
optfinalrdrp_144564145_uff_E=652.83	-6.3	6.996	5.032
optfinalrdrp_142550524_uff_E=360.94	-6.3	6.204	1.996
optfinalrdrp_142550519_uff_E=411.61	-6.3	4.481	3.048
optfinalrdrp_138514336_uff_E=331.78	-6.3	4.368	2.991
optfinalrdrp_138514334_uff_E=388.58	-6.3	8.109	4.387
optfinalrdrp_138514334_uff_E=388.58	-6.3	5.606	3.546
optfinalrdrp_138496616_uff_E=483.72	-6.3	5.377	3.441
optfinalrdrp_137467528_uff_E=393.76	-6.3	0	0
optfinalrdrp_137467447_uff_E=315.96	-6.3	0	0
optfinalrdrp_137467447_uff_E=315.96	-6.3	5.714	2.06
optfinalrdrp_137467381_uff_E=489.66	-6.3	8.872	6.268
optfinalrdrp_137467381_uff_E=489.66	-6.3	10.789	7.806
optfinalrdrp_137467368_uff_E=441.10	-6.3	0	0
optfinalrdrp_137467367_uff_E=372.94	-6.3	0	0
optfinalrdrp_131975184_uff_E=547.56	-6.3	2.42	1.749
optfinalrdrp_131975182_uff_E=561.17	-6.3	7.29	3.536
optfinalrdrp_131964506_uff_E=573.49	-6.3	12.943	10.994
optfinalrdrp_131964506_uff_E=573.49	-6.3	8.785	6.168
optfinalrdrp_131964506_uff_E=573.49	-6.3	7.624	5.732
optfinalrdrp_129010273_uff_E=436.64	-6.3	4.508	2.564
optfinalrdrp_123293391_uff_E=636.92	-6.3	6.18	3.501
optfinalrdrp_123293391_uff_E=636.92	-6.3	7.786	2.688
optfinalrdrp_123282608_uff_E=523.14	-6.3	4.434	3.105
optfinalrdrp_123214764_uff_E=687.85	-6.3	6.7	3.256
optfinalrdrp_118267096_uff_E=623.75	-6.3	5.612	3.149
optfinalrdrp_118267049_uff_E=466.20	-6.3	0	0
optfinalrdrp_118267049_uff_E=466.20	-6.3	6.166	2.604
optfinalrdrp_118267046_uff_E=447.92	-6.3	4.398	2.536
optfinalrdrp_118267046_uff_E=447.92	-6.3	6.268	3.224
optfinalrdrp_118263272_uff_E=1079.99	-6.3	6.626	2.35
optfinalrdrp_118263269_uff_E=1102.50	-6.3	8.432	7.167
optfinalrdrp_118263269_uff_E=1102.50	-6.3	15.511	12.776
optfinalrdrp_118263269_uff_E=1102.50	-6.3	11.496	8.598
optfinalrdrp_118263268_uff_E=1104.59	-6.3	10.651	8.273
optfinalrdrp_118263268_uff_E=1104.59	-6.3	6.829	4.435
optfinalrdrp_118263268_uff_E=1104.59	-6.3	6.889	5.421
optfinalrdrp_118263268_uff_E=1104.59	-6.3	3.48	2.419
optfinalrdrp_118263264_uff_E=1066.87	-6.3	16.363	13.969
optfinalrdrp_118263264_uff_E=1066.87	-6.3	4.81	3.047
optfinalrdrp_118263251_uff_E=515.77	-6.3	5.445	2.713
optfinalrdrp_118263250_uff_E=523.14	-6.3	4.453	3.117
optfinalrdrp_118263250_uff_E=523.14	-6.3	8.081	2.511
optfinalrdrp_118263248_uff_E=603.75	-6.3	6.938	3.158
optfinalrdrp_118263247_uff_E=624.00	-6.3	9.83	5.838
optfinalrdrp_118263246_uff_E=636.92	-6.3	9.257	5.182
optfinalrdrp_118263245_uff_E=614.68	-6.3	5.359	3.061
optfinalrdrp_118263243_uff_E=326.16	-6.3	5.447	2.567
optfinalrdrp_118263241_uff_E=578.46	-6.3	10.716	4.88
optfinalrdrp_118263231_uff_E=574.80	-6.3	3.998	2.172
optfinalrdrp_118254179_uff_E=699.45	-6.3	5.894	2.487
optfinalrdrp_118254179_uff_E=699.45	-6.3	6.405	3.265
optfinalrdrp_118254142_uff_E=558.28	-6.3	6.72	2.66
optfinalrdrp_118254099_uff_E=523.14	-6.3	8.095	2.501
optfinalrdrp_118207010_uff_E=1815.50	-6.3	5.815	2.288
optfinalrdrp_75218864_uff_E=499.12	-6.3	5.644	3.346
optfinalrdrp_75218824_uff_E=483.43	-6.3	3.841	2.997
optfinalrdrp_75218801_uff_E=494.49	-6.3	15.61	12.868
optfinalrdrp_73331629_uff_E=624.62	-6.3	15.6	12.93
optfinalrdrp_73331629_uff_E=624.62	-6.3	13.488	10.642
optfinalrdrp_73331628_uff_E=624.00	-6.3	9.827	5.871
optfinalrdrp_73331491_uff_E=631.59	-6.3	5.855	3.272
optfinalrdrp_73331490_uff_E=626.42	-6.3	6.454	3.572
optfinalrdrp_73330911_uff_E=636.92	-6.3	7.793	2.673
optfinalrdrp_70870984_uff_E=487.13	-6.3	7.396	5.147
optfinalrdrp_70870984_uff_E=487.13	-6.3	15.445	12.724
optfinalrdrp_70658189_uff_E=385.06	-6.3	16.058	13.618
optfinalrdrp_68727568_uff_E=497.72	-6.3	0	0
optfinalrdrp_57397525_uff_E=364.21	-6.3	0	0
optfinalrdrp_57390407_uff_E=486.36	-6.3	0	0
optfinalrdrp_56950846_uff_E=485.31	-6.3	8.094	4.597
optfinalrdrp_46844022_uff_E=503.08	-6.3	0	0
optfinalrdrp_46844022_uff_E=503.08	-6.3	12.002	8.669
optfinalrdrp_46844022_uff_E=503.08	-6.3	5.378	2.811
optfinalrdrp_46843965_uff_E=501.88	-6.3	0	0
optfinalrdrp_46843961_uff_E=566.24	-6.3	5.795	2.125
optfinalrdrp_46843961_uff_E=566.24	-6.3	6.942	3.846
optfinalrdrp_46843899_uff_E=466.21	-6.3	6.005	2.807
optfinalrdrp_44566068_uff_E=401.62	-6.3	6.887	2.469
optfinalrdrp_44566051_uff_E=374.99	-6.3	3.806	1.813
optfinalrdrp_25171637_uff_E=456.94	-6.3	0	0
optfinalrdrp_14565585_uff_E=471.35	-6.3	0	0
optfinalrdrp_14565585_uff_E=471.35	-6.3	16.332	14.157
optfinalrdrp_14565585_uff_E=471.35	-6.3	5.196	2.463
optfinalrdrp_14565581_uff_E=465.26	-6.3	14.813	13.003
optfinalrdrp_14565581_uff_E=465.26	-6.3	14.522	12.537
optfinalrdrp_10097_uff_E=554.35	-6.3	6.359	2.286
optfinalrdrp_566721_uff_E=474.85	-6.3	7.526	6.572
optfinalrdrp_566721_uff_E=474.85	-6.3	10.311	8.335
optfinalrdrp_586839_uff_E=882.59	-6.3	16.641	14.082
optfinalrdrp_586858_uff_E=517.53	-6.3	0	0
optfinalrdrp_592609_uff_E=494.95	-6.3	0	0
optfinalrdrp_617268_uff_E=361.47	-6.3	4.649	2.849
optfinalrdrp_617713_uff_E=360.61	-6.3	8.738	4.577
optfinalrdrp_44565921_uff_E=420.30	-6.2	0	0
optfinalrdrp_25171633_uff_E=466.90	-6.2	12.163	8.96
optfinalrdrp_46844137_uff_E=493.79	-6.2	9.555	6.938
optfinalrdrp_44566077_uff_E=490.23	-6.2	0	0
optfinalrdrp_25172057_uff_E=459.89	-6.2	5.99	2.989
optfinalrdrp_21677661_uff_E=485.34	-6.2	6.315	2.274
optfinalrdrp_5126442_uff_E=412.73	-6.2	11.347	9.116
optfinalrdrp_195522_uff_E=471.34	-6.2	14.911	12.362
optfinalrdrp_195522_uff_E=471.34	-6.2	16.354	14.131
optfinalrdrp_56950843_uff_E=482.15	-6.2	12.739	9.244
optfinalrdrp_46843964_uff_E=523.87	-6.2	0	0
optfinalrdrp_46843964_uff_E=523.87	-6.2	13.726	10.48
optfinalrdrp_25171847_uff_E=476.88	-6.2	0	0
optfinalrdrp_25171632_uff_E=683.46	-6.2	5.833	2.284
optfinalrdrp_15086460_uff_E=467.63	-6.2	4.275	2.522
optfinalrdrp_253250_uff_E=428.28	-6.2	6.341	2.549
optfinalrdrp_176431_uff_E=457.70	-6.2	0	0
optfinalrdrp_139588134_uff_E=457.99	-6.2	14.802	12.55
optfinalrdrp_139584816_uff_E=463.51	-6.2	0	0
optfinalrdrp_137641183_uff_E=530.84	-6.2	9.313	6.076
optfinalrdrp_127053185_uff_E=417.22	-6.2	14.205	11.691
optfinalrdrp_127053184_uff_E=568.68	-6.2	9.154	6.31
optfinalrdrp_57397526_uff_E=321.86	-6.2	6.045	2.768
optfinalrdrp_57397526_uff_E=321.86	-6.2	7.157	5.119
optfinalrdrp_57395698_uff_E=490.56	-6.2	7.24	2.294
optfinalrdrp_57393956_uff_E=482.31	-6.2	3.444	2.025
optfinalrdrp_44566078_uff_E=549.87	-6.2	6.299	3.807
optfinalrdrp_44566076_uff_E=484.63	-6.2	3.78	2.375
optfinalrdrp_44566076_uff_E=484.63	-6.2	6.05	3.066
optfinalrdrp_44139590_uff_E=680.31	-6.2	6.305	3.792
optfinalrdrp_25171636_uff_E=493.57	-6.2	0	0
optfinalrdrp_10761572_uff_E=428.30	-6.2	4.582	2.805
optfinalrdrp_630845_uff_E=373.54	-6.2	4.058	2.317
optfinalrdrp_620368_uff_E=417.12	-6.2	0	0
optfinalrdrp_154593892_uff_E=383.60	-6.2	3.21	2.309
optfinalrdrp_154593892_uff_E=383.60	-6.2	14.203	11.855
optfinalrdrp_154593892_uff_E=383.60	-6.2	2.389	1.965
optfinalrdrp_153989287_uff_E=412.33	-6.2	7.555	4.874
optfinalrdrp_144564145_uff_E=652.83	-6.2	6.756	3.347
optfinalrdrp_138514463_uff_E=391.15	-6.2	8.313	4.476
optfinalrdrp_138514463_uff_E=391.15	-6.2	7.095	4.246
optfinalrdrp_138514336_uff_E=331.78	-6.2	8.562	6.14
optfinalrdrp_138514336_uff_E=331.78	-6.2	14.334	12.971
optfinalrdrp_138514335_uff_E=406.05	-6.2	14.562	13.128
optfinalrdrp_138496616_uff_E=483.72	-6.2	6.575	4.272
optfinalrdrp_138490235_uff_E=829.78	-6.2	12.93	10.34
optfinalrdrp_137467528_uff_E=393.76	-6.2	0	0
optfinalrdrp_137467524_uff_E=386.34	-6.2	0	0
optfinalrdrp_137467381_uff_E=489.66	-6.2	11.22	8.083
optfinalrdrp_137467381_uff_E=489.66	-6.2	11.622	8.672
optfinalrdrp_137467381_uff_E=489.66	-6.2	6.426	2.211
optfinalrdrp_131975184_uff_E=547.56	-6.2	6.145	3.371
optfinalrdrp_131975184_uff_E=547.56	-6.2	5.474	2.896
optfinalrdrp_131975184_uff_E=547.56	-6.2	8.603	6.698
optfinalrdrp_131975182_uff_E=561.17	-6.2	7.789	4.503
optfinalrdrp_131975182_uff_E=561.17	-6.2	7.585	4.965
optfinalrdrp_131964506_uff_E=573.49	-6.2	8.355	6.362
optfinalrdrp_131964492_uff_E=498.10	-6.2	13.6	9.354
optfinalrdrp_123872201_uff_E=1875.00	-6.2	0	0
optfinalrdrp_123846923_uff_E=605.00	-6.2	10.536	7.813
optfinalrdrp_123350254_uff_E=1809.62	-6.2	0	0
optfinalrdrp_123282608_uff_E=523.14	-6.2	4.227	2.65
optfinalrdrp_123282608_uff_E=523.14	-6.2	8.104	2.512
optfinalrdrp_123282608_uff_E=523.14	-6.2	4.579	3.18
optfinalrdrp_123282608_uff_E=523.14	-6.2	11.848	8.366
optfinalrdrp_118267096_uff_E=623.75	-6.2	7.339	3.212
optfinalrdrp_118267073_uff_E=557.12	-6.2	5.816	2.687
optfinalrdrp_118267052_uff_E=464.23	-6.2	5.724	2.609
optfinalrdrp_118267049_uff_E=466.20	-6.2	6.124	2.665
optfinalrdrp_118267049_uff_E=466.20	-6.2	3.721	2.062
optfinalrdrp_118267049_uff_E=466.20	-6.2	5.631	2.57
optfinalrdrp_118267046_uff_E=447.92	-6.2	4.272	2.4
optfinalrdrp_118267046_uff_E=447.92	-6.2	15.774	14.234
optfinalrdrp_118263272_uff_E=1079.99	-6.2	6.613	2.345
optfinalrdrp_118263272_uff_E=1079.99	-6.2	16.255	12.904
optfinalrdrp_118263269_uff_E=1102.50	-6.2	9.854	4.615
optfinalrdrp_118263268_uff_E=1104.59	-6.2	4.555	2.504
optfinalrdrp_118263268_uff_E=1104.59	-6.2	5.444	3.163
optfinalrdrp_118263264_uff_E=1066.87	-6.2	13.31	10.242
optfinalrdrp_118263264_uff_E=1066.87	-6.2	6.763	3.398
optfinalrdrp_118263250_uff_E=523.14	-6.2	4.26	2.898
optfinalrdrp_118263250_uff_E=523.14	-6.2	8.077	2.6
optfinalrdrp_118263250_uff_E=523.14	-6.2	6.971	4.691
optfinalrdrp_118263248_uff_E=603.75	-6.2	5.078	2.888
optfinalrdrp_118263247_uff_E=624.00	-6.2	7.47	4.599
optfinalrdrp_118263247_uff_E=624.00	-6.2	7.457	4.131
optfinalrdrp_118263245_uff_E=614.68	-6.2	5.207	2.99
optfinalrdrp_118263243_uff_E=326.16	-6.2	6.023	2.953
optfinalrdrp_118263243_uff_E=326.16	-6.2	14.484	13.2
optfinalrdrp_118263242_uff_E=1835.61	-6.2	0	0
optfinalrdrp_118263242_uff_E=1835.61	-6.2	5.449	2.234
optfinalrdrp_118263237_uff_E=588.21	-6.2	14.335	11.753
optfinalrdrp_118263233_uff_E=562.91	-6.2	5.408	2.737
optfinalrdrp_118263231_uff_E=574.80	-6.2	3.99	2.171
optfinalrdrp_118263228_uff_E=472.25	-6.2	7.187	4.502
optfinalrdrp_118254219_uff_E=599.83	-6.2	14.949	11.79
optfinalrdrp_118254213_uff_E=644.51	-6.2	5.976	2.881
optfinalrdrp_118254179_uff_E=699.45	-6.2	15.995	13.262
optfinalrdrp_118254179_uff_E=699.45	-6.2	13.903	11.095
optfinalrdrp_118254099_uff_E=523.14	-6.2	8.155	2.561
optfinalrdrp_118207010_uff_E=1815.50	-6.2	4.207	2.642
optfinalrdrp_91820110_uff_E=337.73	-6.2	0	0
optfinalrdrp_91564943_uff_E=503.49	-6.2	6.062	2.849
optfinalrdrp_91109362_uff_E=525.20	-6.2	0	0
optfinalrdrp_91035900_uff_E=505.87	-6.2	3.145	1.602
optfinalrdrp_75218825_uff_E=478.84	-6.2	11.224	8.741
optfinalrdrp_75218825_uff_E=478.84	-6.2	4.477	2.732
optfinalrdrp_75218824_uff_E=483.43	-6.2	6.994	3.673
optfinalrdrp_75218801_uff_E=494.49	-6.2	5.192	2.911
optfinalrdrp_74426566_uff_E=467.72	-6.2	4.715	2.525
optfinalrdrp_73331629_uff_E=624.62	-6.2	15.565	12.12
optfinalrdrp_70876805_uff_E=498.65	-6.2	0	0
optfinalrdrp_70870984_uff_E=487.13	-6.2	5.895	2.683
optfinalrdrp_70870984_uff_E=487.13	-6.2	14.377	11.314
optfinalrdrp_70870984_uff_E=487.13	-6.2	6.085	2.906
optfinalrdrp_68727568_uff_E=497.72	-6.2	0	0
optfinalrdrp_57397525_uff_E=364.21	-6.2	3.477	2.113
optfinalrdrp_57390407_uff_E=486.36	-6.2	6.892	2.241
optfinalrdrp_46844023_uff_E=474.74	-6.2	0	0
optfinalrdrp_46844022_uff_E=503.08	-6.2	5.521	2.505
optfinalrdrp_46843965_uff_E=501.88	-6.2	0	0
optfinalrdrp_46843963_uff_E=502.61	-6.2	5.525	2.934
optfinalrdrp_46843962_uff_E=816.62	-6.2	0	0
optfinalrdrp_46843961_uff_E=566.24	-6.2	5.869	2.203
optfinalrdrp_46843961_uff_E=566.24	-6.2	6.193	3.368
optfinalrdrp_44566068_uff_E=401.62	-6.2	6.571	2.378
optfinalrdrp_23955821_uff_E=351.99	-6.2	0	0
optfinalrdrp_14565585_uff_E=471.35	-6.2	5.225	2.486
optfinalrdrp_14565581_uff_E=465.26	-6.2	4.219	2.494
optfinalrdrp_611914_uff_E=389.12	-6.2	0	0
optfinalrdrp_611914_uff_E=389.12	-6.2	3.848	2.171
optfinalrdrp_10097_uff_E=554.35	-6.2	6.245	2.352
optfinalrdrp_566721_uff_E=474.85	-6.2	10.356	8.373
optfinalrdrp_574586_uff_E=496.46	-6.2	3.594	2.118
optfinalrdrp_617268_uff_E=361.47	-6.2	14.16	11.446
optfinalrdrp_617268_uff_E=361.47	-6.2	6.197	2.011
optfinalrdrp_44565921_uff_E=420.30	-6.2	0	0
optfinalrdrp_3082005_uff_E=446.17	-6.2	0	0
optfinalrdrp_46844137_uff_E=493.79	-6.2	12.618	9.514
optfinalrdrp_46844137_uff_E=493.79	-6.2	11.578	8.221
optfinalrdrp_46844024_uff_E=467.06	-6.2	12.664	9.543
optfinalrdrp_44566077_uff_E=490.23	-6.2	0	0
optfinalrdrp_44139468_uff_E=480.55	-6.2	5.987	2.259
optfinalrdrp_25172057_uff_E=459.89	-6.2	3.467	2.921
optfinalrdrp_25172057_uff_E=459.89	-6.2	13.363	12.036
optfinalrdrp_25172057_uff_E=459.89	-6.2	6.054	3.084
optfinalrdrp_56950843_uff_E=482.15	-6.2	0	0
optfinalrdrp_56950843_uff_E=482.15	-6.2	4.608	2.396
optfinalrdrp_56950842_uff_E=522.07	-6.2	11.105	8.521
optfinalrdrp_46843964_uff_E=523.87	-6.2	0	0
optfinalrdrp_46843964_uff_E=523.87	-6.2	12.552	8.999
optfinalrdrp_44566031_uff_E=562.36	-6.2	7.186	4.161
optfinalrdrp_25171847_uff_E=476.88	-6.2	0	0
optfinalrdrp_25171632_uff_E=683.46	-6.2	5.73	2.735
optfinalrdrp_25171632_uff_E=683.46	-6.2	5.795	2.285
optfinalrdrp_15086460_uff_E=467.63	-6.2	4.304	2.539
optfinalrdrp_15086460_uff_E=467.63	-6.2	5.811	2.246
optfinalrdrp_6452395_uff_E=485.14	-6.2	5.277	2.824
optfinalrdrp_176431_uff_E=457.70	-6.2	0	0
optfinalrdrp_139584816_uff_E=463.51	-6.2	0	0
optfinalrdrp_57397526_uff_E=321.86	-6.2	12.551	10.517
optfinalrdrp_57397526_uff_E=321.86	-6.2	7.231	5.204
optfinalrdrp_57395698_uff_E=490.56	-6.2	7.28	2.299
optfinalrdrp_57395698_uff_E=490.56	-6.2	3.376	2.038
optfinalrdrp_57393956_uff_E=482.31	-6.2	7.47	2.339
optfinalrdrp_44566078_uff_E=549.87	-6.2	6.376	3.831
optfinalrdrp_44566076_uff_E=484.63	-6.2	3.835	2.388
optfinalrdrp_44566076_uff_E=484.63	-6.2	6.009	3.086
optfinalrdrp_44139590_uff_E=680.31	-6.2	8.375	2.761
optfinalrdrp_25171636_uff_E=493.57	-6.2	0	0
optfinalrdrp_630845_uff_E=373.54	-6.2	4.029	2.278
optfinalrdrp_620368_uff_E=417.12	-6.2	0	0
optfinalrdrp_154593892_uff_E=383.60	-6.2	14.2	11.853
optfinalrdrp_144564067_uff_E=408.10	-6.2	0	0
optfinalrdrp_144564067_uff_E=408.10	-6.2	5.827	2.216
optfinalrdrp_142550538_uff_E=347.64	-6.2	13.797	11.971
optfinalrdrp_142550538_uff_E=347.64	-6.2	15.105	13.239
optfinalrdrp_142550519_uff_E=411.61	-6.2	5.39	2.968
[truncated: 2,789 more rows]
